# Supplementary material for: Gold self-relay catalysis for accessing functionalized cyclopentenones bearing an all-carbon quaternary stereocenter
Source: Royal Society of Chemistry journal article supplement (doi:10.1039/d1qo01313k), 2021-11-18
Supplement: d1qo01313k1.pdf [file d1qo01313k1.pdf]

## Supporting Information

# Gold self-relay catalysis for accessing functionalized cyclopentenones bearing an all-carbon quaternary stereocenter

Fan-Tao Meng,<sup>a</sup> Jing-Long Chen,<sup>a</sup> Xiao-Yan Qin,<sup>a</sup> Tian-Shu Zhang,<sup>\*,b</sup> Shu-Jiang Tu,<sup>a</sup> Bo Jiang,<sup>\*,a</sup> and Wen-Juan Hao<sup>\*,a</sup>

<sup>a</sup>School of Chemistry & Materials Science, Jiangsu Key Laboratory of Green Synthetic Chemistry for Functional Materials, Jiangsu Normal University, Xuzhou 221116, P. R. China. wjhao@jsnu.edu.cn(WJH); jiangchem@jsnu.edu.cn (BJ)

<sup>b</sup>School of Materials and Chemical Engineering, Xuzhou University of Technology, Xuzhou 221018, P. R. China; email: zts11975@xzit.edu.cn (TSZ)

### Contents

|                                                                                           |          |
|-------------------------------------------------------------------------------------------|----------|
| General Information.....                                                                  | S2       |
| General Procedure A for the Synthesis of Compounds <b>1o</b> and <b>1p</b> .....          | S2       |
| Characterization Data of Compounds <b>1o</b> and <b>1p</b> .....                          | S2-S3    |
| General Procedure for the Synthesis of <b>3</b> .....                                     | S3       |
| Gram-scale experiment for the Synthesis of <b>3b</b> .....                                | S3       |
| Crossover Experiment.....                                                                 | S3-S4    |
| Characterization Data of Compounds <b>3a-3v</b> .....                                     | S4-S10   |
| General Procedure for the Synthesis of <b>5</b> .....                                     | S10      |
| Gram-scale experiment for the Synthesis of <b>5p</b> .....                                | S10-S11  |
| Characterization Data of Compounds <b>5a-5v</b> .....                                     | S11-S18  |
| Copies of <sup>1</sup> H and <sup>13</sup> C NMR Spectra for Compounds <b>3a-3v</b> ..... | S19-S64  |
| Copies of <sup>1</sup> H and <sup>13</sup> C NMR Spectra for Compounds <b>5a-5v</b> ..... | S65-S108 |

## Experimental

### General Information

$^1\text{H}$  NMR ( $^{13}\text{C}$  NMR) spectra were measured on a Bruker DPX 400 MHz spectrometer in  $\text{CDCl}_3$  ( $\text{DMSO}-d_6$ ) with chemical shift ( $\delta$ ) given in ppm relative to TMS as internal standard [(s = singlet, d = doublet, t = triplet, brs = broad singlet, m = multiplet), coupling constant ( $\text{Hz}$ )]. HRMS (ESI) was determined by using microTOF-QII HRMS/MS instrument (BRUKER). X-Ray crystallographic analysis was performed with a Siemens SMART CCD and a Siemens P4 diffractometer.

### General Procedure A for the Synthesis of Compounds **1m** and **1n**.

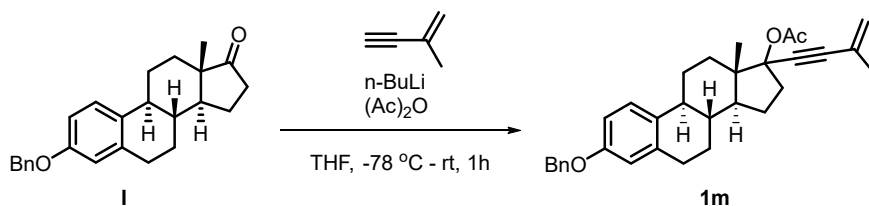

To a THF (0.5 M) solution of 2-methylbut-1-en-3-yne (1.0 equiv) was added *n*-BuLi (2.5 M in hexane, 1.1 equiv) at  $-78$  °C, and the mixture was stirred at this temperature for 0.5 h. To this solution was added **I** (1.0 equiv) at  $-78$  °C, and the reaction mixture was warmed to room temperature, and stirred for 1 h. The solution was added with acetic anhydride (1.2 equiv) and stirred for 1 h. To this reaction mixture was added, a saturated  $\text{NH}_4\text{Cl}$  solution, and the solution was extracted with diethyl ether (2 x 50mL) and washed with brine (30 mL). The combined organic extracts were dried over  $\text{MgSO}_4$  and concentrated under reduced pressure. The crude material was then purified by column chromatography on silica gel with a mixture of petroleum ether and ethyl acetate to give **1m**.

**(8*R*,9*S*,13*S*,14*S*)-3-(Benzyloxy)-13-methyl-17-(3-methylbut-3-en-1-yn-1-yl)-7,8,9,11,12,13,14,15,16,17-decahydro-6*H*-cyclopenta[*a*]phenanthren-17-yl acetate (1o)**

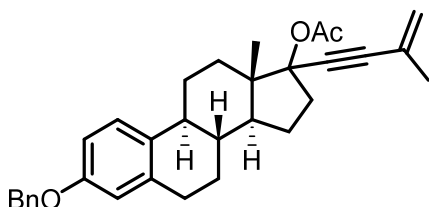

colorless oil; 80% yield;  $^1\text{H}$  NMR (400 MHz,  $\text{CDCl}_3$ ) ( $\delta$ , ppm): 7.48-7.33 (m, 5H), 7.26 (d,  $J = 8.0$  Hz, 1H), 6.84-6.81 (m, 1H), 6.76 (s, 1H), 5.34 (s, 1H), 5.25 (s, 1H), 5.06 (s, 2H), 2.89 (d,  $J = 3.6$  Hz, 3H), 2.38 (s, 1H), 2.30-2.24 (m, 1H), 2.13 (s, 1H), 2.09 (d,  $J = 6.0$  Hz, 3H), 2.03 (d,  $J = 4.0$  Hz, 1H), 1.94 (s, 3H), 1.91-1.85 (m, 2H), 1.79-1.73 (m, 1H), 1.57-1.40 (m, 4H), 0.96 (d,  $J = 4.8$  Hz, 3H);  $^{13}\text{C}$  NMR (100 MHz,  $\text{CDCl}_3$ ) ( $\delta$ , ppm): 169.5, 156.8, 138.0, 137.4, 132.8, 128.6, 127.9, 127.5, 126.6, 126.5, 121.9, 114.9, 112.4, 88.2, 87.8, 85.0, 70.0, 48.3, 48.1, 43.7, 39.2, 37.5, 3.4, 29.9, 27.4, 26.5, 23.6, 23.4, 21.6, 13.63; IR (KBr,  $\nu$ ,  $\text{cm}^{-1}$ ): 2939, 1735, 1366, 1240, 1024, 903, 738; HRMS (ESI -TOF)  $m/z$ :  $[\text{M}+\text{Na}]^+$  Calcd for  $\text{C}_{32}\text{H}_{36}\text{O}_3$  491.2562; Found 491.2553.

**(3*S*,5*S*,8*R*,9*S*,10*S*,13*S*,14*S*)-10,13-Dimethyl-17-(3-methylbut-3-en-1-yn-1-yl)-3-((tetrahydro-2*H*-pyran-2-yl)oxy)hexa-decahydro-1*H*-cyclopenta[*a*]phenanthren-17-yl acetate (1p)**

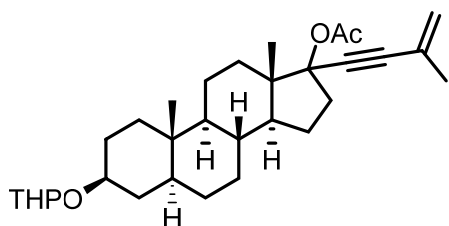

colorless oil; 75% yield;  $^1\text{H}$  NMR (400 MHz,  $\text{CDCl}_3$ ) ( $\delta$ , ppm): 5.22 (s, 1H), 5.15 (s, 1H), 4.66 (d,  $J = 2.8$  Hz, 1H), 3.88-3.83 (m, 1H), 3.67 (s, 3H), 3.55-3.51 (m, 1H), 3.43-3.40 (m, 1H), 2.67-2.57 (m, 1H), 1.96 (s, 3H), 1.83 (s, 3H), 1.78 (d,  $J = 7.2$  Hz, 2H), 1.71-1.55 (m, 8H), 1.47 (s, 5H), 1.40-1.29 (m, 3H), 1.27-1.13 (m, 5H), 0.95-0.87 (m, 2H), 0.78 (d,  $J = 9.6$  Hz, 6H), 0.64-0.57 (m, 1H);  $^{13}\text{C}$  NMR (100 MHz,  $\text{CDCl}_3$ ) ( $\delta$ , ppm): 169.4, 126.7, 121.7, 97.0, 96.7, 94.6, 88.4, 87.7, 85.2, 62.9, 54.1, 49.1, 48.1, 45.1, 44.8, 43.6, 37.6, 36.0, 35.9, 35.8, 34.4, 33.4, 31.8, 31.4, 28.7, 25.7, 23.8, 23.6, 21.6, 21.0, 20.1, 13.7, 12.41; IR (KBr,  $\nu$ ,  $\text{cm}^{-1}$ ): 2956, 1668, 1491, 1322, 1113, 811, 759; HRMS (ESI -TOF)  $m/z$ :  $[\text{M}+\text{Na}]^+$  Calcd for  $\text{C}_{31}\text{H}_{46}\text{O}_4$  505.3294; Found 505.3294.

### General Procedure for the Synthesis of Products 3a-3v.

Example for the synthesis of **3a**:

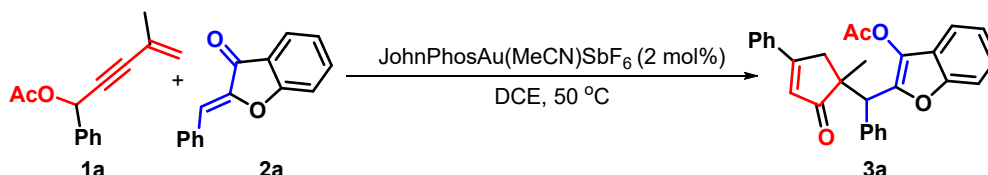

To a 10 mL Schlenk tube under air conditions, 1,3-enyne esters (**1a**, 0.2 mmol, 1 equiv), oxodiene (**2a**, 0.2 mmol, 1 equiv), JohnPhosAu(MeCN)SbF<sub>6</sub> (2 mol%), 1,2-dichloroethane (2.5 mL) were successively added. The mixture was stirred at 50 °C. The reactions were monitored by TLC. After the reaction was completed (indicated by TLC, petroleum ether : ethyl acetate = 5:1), the reaction mixture was concentrated by vacuum distillation and was purified by flash column chromatography to afford the desired pure product (**3a**, 55.9 mg, 64% yield) as yellowish oil.

### Gram-Scale Experiment for the Synthesis of Product 3b.

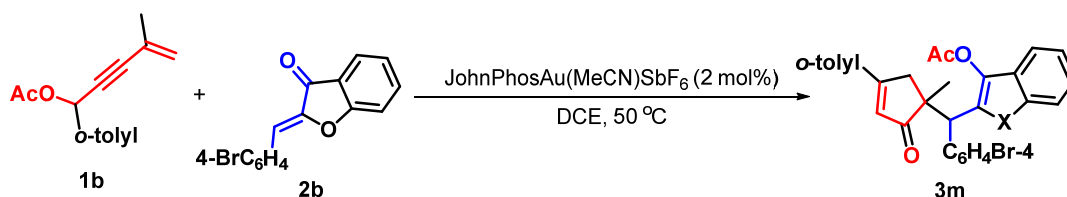

To a 50 mL Schlenk flask under air conditions, 1,3-enyne ester **1b** (3 mmol, 1 equiv), oxodiene **2b** (3 mmol, 1 equiv), JohnPhosAu(MeCN)SbF<sub>6</sub> (2 mol%), 1,2-dichloroethane (15 mL) were successively added. The mixture was stirred at 50 °C. The reactions were monitored by TLC. After the reaction was completed (indicated by TLC, petroleum ether: ethyl acetate = 5:1), the reaction mixture was concentrated by vacuum distillation and was purified by flash column chromatography to afford the desired pure product (**3m**, 1.032g, 65% yield) as yellowish oil.

### Crossover Experiments

To a 10 mL Schlenk tube under air conditions, 1,3-enyne acetate (**1a**, 0.05 mmol, 1 equiv), 1,3-enyne propionate (**1q**, 0.05 mmol, 1 equiv), aurone (**2a**, 0.1 mmol, 2 equiv), JohnPhosAu(MeCN)SbF<sub>6</sub> (2 mol%), 1,2-dichloroethane (2.5 mL) were successively added. The mixture was stirred at 50 °C for 20 hours. After the reaction was completed (indicated by TLC, petroleum ether: ethyl acetate = 5:1), the reaction mixture was detected by HRMS analysis.

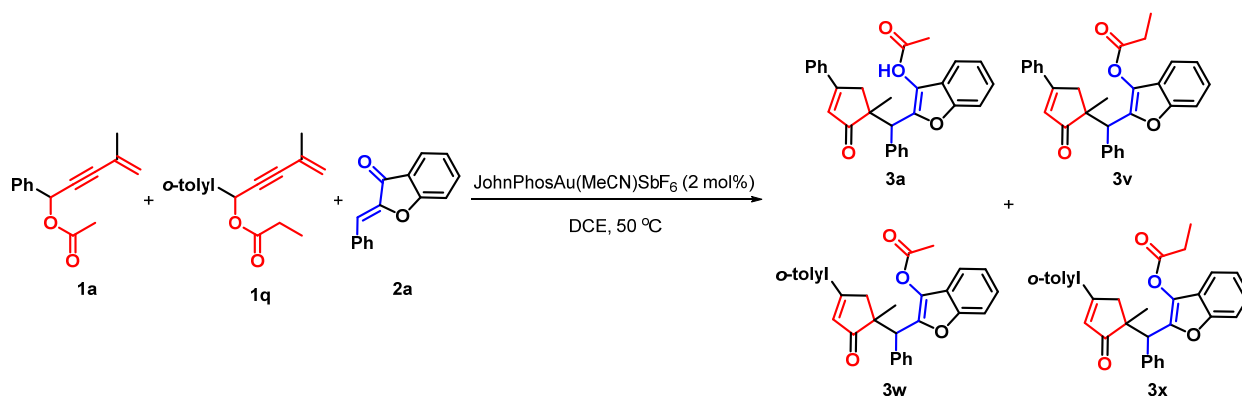

**3a** HRMS (ESI -TOF)  $m/z$ :  $[\text{M}+\text{H}]^+$  Calcd for  $\text{C}_{29}\text{H}_{25}\text{O}_4$  437.1753; Found 451.1735

**3v** and **3w**: HRMS (ESI -TOF)  $m/z$ :  $[\text{M}+\text{H}]^+$  Calcd for  $\text{C}_{30}\text{H}_{26}\text{O}_4$  451.1909; Found 451.1892.

**3x**: HRMS (ESI -TOF)  $m/z$ :  $[\text{M}+\text{H}]^+$  Calcd for  $\text{C}_{31}\text{H}_{29}\text{O}_4$  465.2066; Found 465.2049.

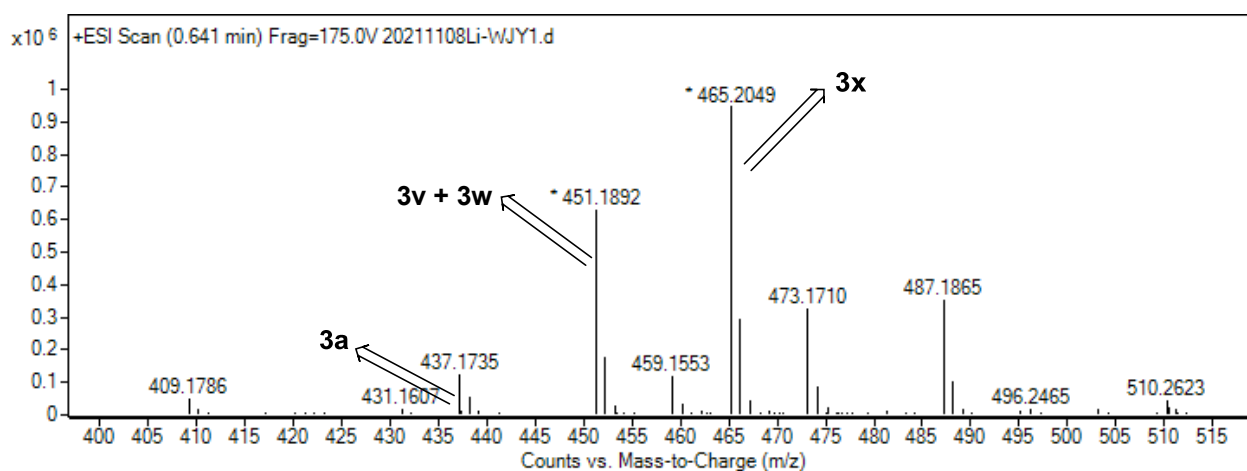

**2-((1-Methyl-2-oxo-4-phenylcyclopent-3-en-1-yl)(phenyl)methyl)benzofuran-3-yl acetate (**3a**, major)**

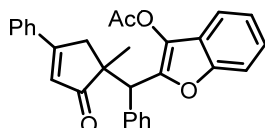

yellowish oil; 55.9 mg, 64% yield; <sup>1</sup>H NMR (400 MHz, CDCl<sub>3</sub>) ( $\delta$ , ppm): 7.60 (d,  $J = 7.2$  Hz, 4H), 7.44 (d,  $J = 4.0$  Hz, 6H), 7.35 (d,  $J = 7.6$  Hz, 2H), 7.15-7.09 (m, 3H), 6.47 (s, 1H), 4.79 (s, 1H), 4.69 (s, 1H), 4.02 (d,  $J = 17.6$  Hz, 1H), 2.84 (d,  $J = 17.6$  Hz, 1H), 2.25 (s, 3H), 1.16 (s, 3H); <sup>13</sup>C NMR (100 MHz, CDCl<sub>3</sub>) ( $\delta$ , ppm): 213.3, 171.8, 141.5, 139.0, 133.9, 133.2, 132.1, 131.4, 130.2, 128.9, 128.8, 128.2, 128.1, 127.8, 127.7, 127.0, 125.7, 56.3 (4° C), 52.6 (3° C), 40.5 (2° C), 26.5 (1° C), 26.3 (1° C); IR (KBr,  $\nu$ , cm<sup>-1</sup>): 3057, 2925, 1693, 1600, 1449, 1305, 1096, 736; HRMS (ESI -TOF)  $m/z$ :  $[\text{M}+\text{Na}]^+$  Calcd for  $\text{C}_{29}\text{H}_{24}\text{O}_4\text{Na}$  459.1572; Found 459.1575.

**2-((1-Methyl-2-oxo-4-(o-tolyl)cyclopent-3-en-1-yl)(phenyl)methyl)benzofuran-3-yl acetate (**3b**, major)**

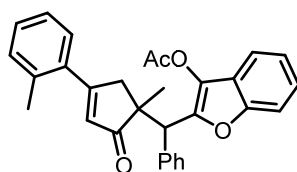

white solid; 67.6 mg, 75% yield; mp: 156.7-163.5 °C; <sup>1</sup>H NMR (400 MHz, CDCl<sub>3</sub>) ( $\delta$ , ppm): 7.56 (d,  $J = 7.6$  Hz, 2H),

7.40-7.36 (m, 2H), 7.34-7.27 (m, 4H), 7.25 (d,  $J = 2.4$  Hz, 2H), 7.23-7.14 (m, 3H), 6.16 (s, 1H), 4.65 (s, 1H), 4.00 (d,  $J = 18.4$  Hz, 1H), 2.76 (d,  $J = 18.4$  Hz, 1H), 2.24 (s, 3H), 2.18 (s, 3H), 1.16 (s, 3H);  $^{13}\text{C}$  NMR (100 MHz,  $\text{CDCl}_3$ ) ( $\delta$ , ppm): 212.1, 173.8, 168.1, 152.2, 145.7, 137.4, 135.9, 135.6, 131.2, 130.6, 130.0, 129.8, 129.5, 128.5, 127.4, 127.1, 126.0, 124.3, 122.9, 122.9, 119.0, 111.4, 51.9 ( $4^\circ\text{C}$ ), 48.0 ( $3^\circ\text{C}$ ), 44.3 ( $2^\circ\text{C}$ ), 24.7 ( $1^\circ\text{C}$ ), 20.9 ( $1^\circ\text{C}$ ), 20.4 ( $1^\circ\text{C}$ ); HRMS (ESI -TOF)  $m/z$ :  $[\text{M}+\text{H}]^+$  Calcd for  $\text{C}_{30}\text{H}_{27}\text{O}_4$  451.1909; Found 451.1908.

**2-((1-Methyl-2-oxo-4-(*m*-tolyl)cyclopent-3-en-1-yl)(phenyl)methyl)benzofuran-3-yl acetate (3c, major)**

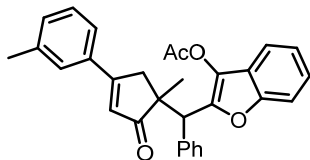

yellowish oil; 53.2 mg, 59% yield;  $^1\text{H}$  NMR (400 MHz,  $\text{CDCl}_3$ ) ( $\delta$ , ppm): 7.59 (d,  $J = 7.2$  Hz, 2H), 7.42 (d,  $J = 8.4$  Hz, 4H), 7.36-7.32 (m, 4H), 7.28 (s, 1H), 7.14-7.12 (m, 2H), 6.45 (s, 1H), 4.67 (s, 1H), 3.98 (d,  $J = 17.9$  Hz, 1H), 2.83 (d,  $J = 17.6$  Hz, 1H), 2.41 (s, 3H), 2.24 (s, 3H), 1.14 (s, 3H);  $^{13}\text{C}$  NMR (100 MHz,  $\text{CDCl}_3$ ) ( $\delta$ , ppm): 211.8, 171.9, 168.2, 152.3, 145.9, 138.6, 137.7, 134.2, 132.1, 130.1, 129.2, 128.6, 127.6, 124.8, 124.2, 122.9, 118.9, 111.6, 52.4 ( $4^\circ\text{C}$ ), 47.9 ( $3^\circ\text{C}$ ), 40.8 ( $2^\circ\text{C}$ ), 25.1 ( $1^\circ\text{C}$ ), 21.5 ( $1^\circ\text{C}$ ), 20.5 ( $1^\circ\text{C}$ ); IR (KBr,  $\nu$ ,  $\text{cm}^{-1}$ ): 3060, 2926, 1775, 1695, 1453, 1197, 1095, 743; HRMS (ESI -TOF)  $m/z$ :  $[\text{M}+\text{H}]^+$  Calcd for  $\text{C}_{30}\text{H}_{27}\text{O}_4$  451.1909; Found 451.1907.

**2-((1-Methyl-2-oxo-4-(*p*-tolyl)cyclopent-3-en-1-yl)(phenyl)methyl)benzofuran-3-yl acetate (3d, major)**

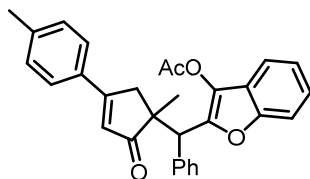

yellowish oil; 48.7 mg, 54% yield;  $^1\text{H}$  NMR (400 MHz,  $\text{CDCl}_3$ ) ( $\delta$ , ppm): 7.55-7.51 (m, 3H), 7.44-7.35 (m, 3H), 7.24 (d,  $J = 8.0$  Hz, 4H), 7.14-7.07 (m, 3H), 6.42 (s, 1H), 4.67 (s, 1H), 3.99 (d,  $J = 18.0$  Hz, 1H), 2.81 (d,  $J = 18.0$  Hz, 1H), 2.40 (s, 3H), 2.25 (s, 3H), 1.14 (s, 3H);  $^{13}\text{C}$  NMR (100 MHz,  $\text{CDCl}_3$ ) ( $\delta$ , ppm): 211.8, 204.6, 171.7, 168.2, 152.4, 145.9, 141.9, 137.8, 131.5, 130.7, 129.6, 128.6, 128.3, 127.0, 124.3, 124.0, 122.9, 122.9, 118.9, 111.6, 52.3 ( $4^\circ\text{C}$ ), 46.5 ( $3^\circ\text{C}$ ), 40.7 ( $2^\circ\text{C}$ ), 25.2 ( $1^\circ\text{C}$ ), 21.7 ( $1^\circ\text{C}$ ), 20.5 ( $1^\circ\text{C}$ ); IR (KBr,  $\nu$ ,  $\text{cm}^{-1}$ ): 3062, 2928, 1767, 1698, 1454, 1195, 1096, 748; HRMS (ESI -TOF)  $m/z$ :  $[\text{M}+\text{H}]^+$  Calcd for  $\text{C}_{30}\text{H}_{27}\text{O}_4$  451.1909; Found 451.1907.

**2-((4-(2-Chlorophenyl)-1-methyl-2-oxocyclopent-3-en-1-yl)(phenyl)methyl)benzofuran-3-yl acetate (3e, major)**

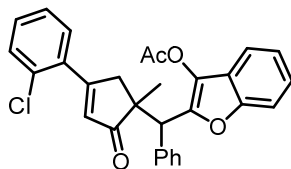

white solid; 64.0 mg, 68% yield; mp: 129.6-134.1  $^\circ\text{C}$ ;  $^1\text{H}$  NMR (400 MHz,  $\text{CDCl}_3$ ) ( $\delta$ , ppm): 7.53 (d,  $J = 7.6$  Hz, 2H), 7.43 (d,  $J = 7.6$  Hz, 1H), 7.39-7.35 (m, 2H), 7.33-7.28 (m, 4H), 7.25 (s, 1H), 7.22-7.13 (m, 2H), 6.41 (s, 1H), 4.64 (s, 1H), 4.03 (d,  $J = 18.4$  Hz, 1H), 2.83 (d,  $J = 18.4$  Hz, 1H), 2.20 (s, 3H), 1.15 (s, 3H);  $^{13}\text{C}$  NMR (100 MHz,  $\text{CDCl}_3$ ) ( $\delta$ , ppm): 212.0, 171.2, 168.1, 152.3, 145.7, 137.5, 135.0, 132.4, 130.0, 129.1, 128.6, 127.5, 127.0, 124.4, 123.0, 122.9, 119.0, 111.6, 52.2 ( $4^\circ\text{C}$ ), 48.1 ( $3^\circ\text{C}$ ), 43.7 ( $2^\circ\text{C}$ ), 24.7 ( $1^\circ\text{C}$ ), 20.4 ( $1^\circ\text{C}$ ); IR (KBr,  $\nu$ ,  $\text{cm}^{-1}$ ): 2927, 1773, 1702, 1601, 1367, 1197, 1097, 744; HRMS (ESI -TOF)  $m/z$ :  $[\text{M}+\text{Na}]^+$  Calcd for  $\text{C}_{29}\text{H}_{23}\text{ClO}_4\text{Na}$  493.1183; Found 493.1170.

**2-((4-(3-Chlorophenyl)-1-methyl-2-oxocyclopent-3-en-1-yl)(phenyl)methyl)benzofuran-3-yl acetate (3f, major)**

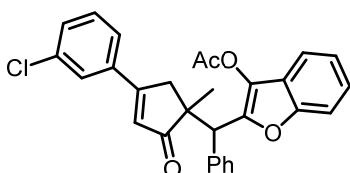

white solid; 65.9 mg, 70% yield; mp: 144.8-151.7 °C; <sup>1</sup>H NMR (400 MHz, CDCl<sub>3</sub>) (δ, ppm): 7.59 (s, 2H), 7.48 (d, *J* = 4.8 Hz, 1H), 7.42 (d, *J* = 7.6 Hz, 3H), 7.34 (d, *J* = 8.0 Hz, 2H), 7.30 (s, 1H), 7.25-7.21 (m, 1H), 7.14-7.11 (m, 3H), 6.44 (s, 1H), 4.65 (s, 1H), 3.96 (d, *J* = 18.0 Hz, 1H), 2.78 (d, *J* = 18.0 Hz, 1H), 2.24 (s, 3H), 1.13 (s, 3H); <sup>13</sup>C NMR (100 MHz, CDCl<sub>3</sub>) (δ, ppm): 211.5, 169.9, 168.2, 152.3, 145.6, 137.5, 136.0, 135.1, 131.1, 130.0, 128.7, 127.5, 126.9, 125.1, 123.0, 119.0, 111.6, 52.5 (4° C), 47.9 (3° C), 40.8 (2° C), 25.0 (1° C), 20.5 (1° C); IR (KBr, ν, cm<sup>-1</sup>): 3061, 2927, 1775, 1698, 1453, 1368, 1197, 741; HRMS (ESI -TOF) *m/z*: [M+Na]<sup>+</sup> Calcd for C<sub>29</sub>H<sub>23</sub>ClO<sub>4</sub>Na 493.1183; Found 493.1165.

**2-((4-(4-Chlorophenyl)-1-methyl-2-oxocyclopent-3-en-1-yl)(phenyl)methyl)benzofuran-3-yl acetate (3g, major)**

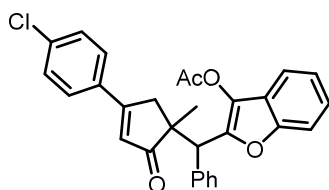

white solid; 66.9 mg, 71% yield; mp: 101.0-106.5 °C; <sup>1</sup>H NMR (400 MHz, CDCl<sub>3</sub>) (δ, ppm): 7.63-7.60 (m, 4H), 7.46-7.44 (m, 4H), 7.35 (d, *J* = 7.6 Hz, 2H), 7.22-7.18 (m, 3H), 6.46 (s, 1H), 4.69 (s, 1H), 4.02 (d, *J* = 18.0 Hz, 1H), 2.83 (d, *J* = 17.6 Hz, 1H), 2.29 (s, 3H), 1.18 (s, 3H); <sup>13</sup>C NMR (100 MHz, CDCl<sub>3</sub>) (δ, ppm): 211.6, 170.1, 168.2, 152.3, 145.7, 137.5, 132.6, 130.0, 129.2, 128.7, 128.3, 125.3, 124.4, 123.0, 111.5, 52.5 (4° C), 47.9 (3° C), 40.7 (2° C), 25.0 (1° C), 20.5 (1° C); IR (KBr, ν, cm<sup>-1</sup>): 3061, 2927, 1774, 1698, 1453, 1197, 1090, 740; HRMS (ESI -TOF) *m/z*: [M+Na]<sup>+</sup> Calcd for C<sub>29</sub>H<sub>23</sub>ClO<sub>4</sub>Na 493.1183; Found 493.1166.

**(E)-2-((4-Bromophenyl)(1-methyl-2-oxo-4-styrylcyclopent-3-en-1-yl)methyl)benzofuran-3-yl acetate (3h, major)**

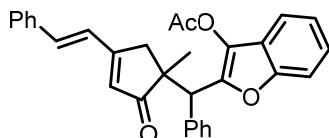

yellowish oil; 53.1 mg, 49% yield; <sup>1</sup>H NMR (400 MHz, CDCl<sub>3</sub>) (δ, ppm): 7.53 (d, *J* = 8.0 Hz, 4H), 7.47 (d, *J* = 8.0 Hz, 2H), 7.42-7.35 (m, 3H), 7.27 (s, 1H), 7.25 (s, 1H), 7.19-7.07 (m, 4H), 6.03 (s, 1H), 4.59 (s, 1H), 3.75 (d, *J* = 17.2 Hz, 1H), 2.67 (d, *J* = 17.2 Hz, 1H), 2.30 (s, 3H), 1.10 (s, 3H); <sup>13</sup>C NMR (100 MHz, CDCl<sub>3</sub>) (δ, ppm): 211.3, 169.5, 168.2, 152.4, 145.2, 136.9, 136.7, 135.6, 131.8, 130.7, 129.7, 129.0, 128.3, 127.7, 124.5, 124.1, 123.0, 122.7, 121.5, 119.0, 111.6, 51.9 (4° C), 47.3 (3° C), 38.9 (2° C), 25.0 (1° C), 20.5 (1° C); IR (KBr, ν, cm<sup>-1</sup>): 2926, 1772, 1694, 1623, 1489, 1195, 1010, 749; HRMS (ESI -TOF) *m/z*: [M+H]<sup>+</sup> Calcd for C<sub>31</sub>H<sub>26</sub>BrO<sub>4</sub> 541.1014; Found 541.0978.

**2-((4-Benzyl-1-methyl-2-oxocyclopent-3-en-1-yl)(4-bromophenyl)methyl)benzofuran-3-yl acetate (3i, major)**

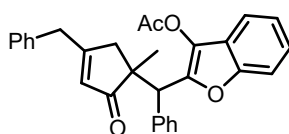

yellowish oil; 69.9 mg, 66% yield; mp: 139.1-140.6 °C; <sup>1</sup>H NMR (400 MHz, CDCl<sub>3</sub>) (δ, ppm): 7.47 (d, *J* = 8.4 Hz, 2H), 7.33-7.27 (m, 6H), 7.25 (s, 3H), 7.18 (d, *J* = 7.2 Hz, 3H), 6.99 (d, *J* = 7.2 Hz, 2H), 5.83 (s, 1H), 5.34-5.32 (m, 1H), 4.54 (s, 1H), 3.64 (s, 1H), 3.52 (d, *J* = 15.6 Hz, 1H), 3.46 (d, *J* = 18.4 Hz, 1H), 2.32 (d, *J* = 18.4 Hz, 1H), 2.28 (s, 3H), 1.00 (s, 3H); <sup>13</sup>C NMR (100 MHz, CDCl<sub>3</sub>) (δ, ppm): 211.9, 178.5, 168.2, 152.4, 145.1, 136.7, 136.5, 131.7, 131.4, 128.8, 128.8,

127.0, 124.5, 123.1, 122.8, 121.4, 119.1, 111.7, 52.4 (4° C), 47.2 (2° C), 42.9 (3° C), 40.0 (2° C), 24.5 (1° C), 20.5 (1° C); IR (KBr,  $\nu$ ,  $\text{cm}^{-1}$ ): 3061, 1778, 1701, 1454, 1368, 1196, 1011, 748; HRMS (ESI -TOF)  $m/z$ :  $[\text{M}+\text{Na}]^+$  Calcd for  $\text{C}_{30}\text{H}_{25}\text{BrO}_4\text{Na}$  551.0834; Found 551.0833.

**2-((4-Bromophenyl)(4-(tert-butyl)-1-methyl-2-oxocyclopent-3-en-1-yl)methyl)benzofuran-3-yl acetate (3j, major)**

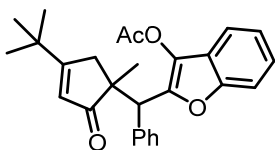

white solid; 54.5 mg, 55% yield; mp: 131.8-132.9 °C;  $^1\text{H}$  NMR (400 MHz,  $\text{CDCl}_3$ ) ( $\delta$ , ppm): 7.49 (d,  $J = 8.4$  Hz, 2H), 7.41 (d,  $J = 8.0$  Hz, 2H), 7.29 (s, 2H), 7.16 (d,  $J = 8.0$  Hz, 2H), 5.79 (s, 1H), 4.51 (s, 1H), 3.61 (d,  $J = 18.4$  Hz, 1H), 2.40 (s, 1H), 2.29 (s, 3H), 1.09 (s, 9H), 1.03 (s, 3H);  $^{13}\text{C}$  NMR (100 MHz,  $\text{CDCl}_3$ ) ( $\delta$ , ppm): 212.5, 188.9, 168.0, 152.3, 145.2, 136.7, 131.7, 130.9, 124.7, 123.3, 123.0, 121.4, 119.1, 111.4, 51.9 (4° C), 47.2 (4° C), 39.6 (3° C), 35.1 (1° C), 28.7 (2° C), 24.6 (1° C), 20.5 (1° C); IR (KBr,  $\nu$ ,  $\text{cm}^{-1}$ ): 2965, 2870, 1779, 1701, 1454, 1368, 1194, 746; HRMS (ESI -TOF)  $m/z$ :  $[\text{M}+\text{H}^+]$  Calcd for  $\text{C}_{27}\text{H}_{28}\text{BrO}_4$  495.1171; Found 495.1162.

**2-((4-Bromophenyl)(4-cyclohexyl-1-methyl-2-oxocyclopent-3-en-1-yl)methyl)benzofuran-3-yl acetate (3k, major)**

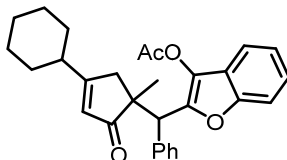

yellowish oil; 73.0 mg, 70% yield;  $^1\text{H}$  NMR (400 MHz,  $\text{CDCl}_3$ ) ( $\delta$ , ppm): 7.48 (d,  $J = 8.0$  Hz, 2H), 7.40 (d,  $J = 8.4$  Hz, 2H), 7.28 (d,  $J = 3.6$  Hz, 2H), 7.15 (d,  $J = 8.0$  Hz, 2H), 5.77 (s, 1H), 4.50 (s, 1H), 3.58 (d,  $J = 18.4$  Hz, 1H), 2.35 (s, 1H), 2.28 (s, 3H), 2.23 (d,  $J = 11.6$  Hz, 1H), 1.78-1.71 (m, 5H), 1.31-1.22 (m, 5H), 1.02 (s, 3H);  $^{13}\text{C}$  NMR (100 MHz,  $\text{CDCl}_3$ ) ( $\delta$ , ppm): 212.3, 185.3, 168.1, 152.3, 145.2, 136.8, 131.6, 131.2, 125.4, 124.5, 123.0, 122.7, 121.4, 119.1, 111.4, 51.5 (4° C), 47.2 (3), 41.9 (3° C), 41.46 (2° C), 31.1 (2° C), 25.9 (2° C), 24.6 (1° C), 20.5 (1° C); IR (KBr,  $\nu$ ,  $\text{cm}^{-1}$ ): 2928, 2853, 1779, 1700, 1453, 1368, 1196, 746; HRMS (ESI -TOF)  $m/z$ :  $[\text{M}+\text{H}]^+$  Calcd for  $\text{C}_{29}\text{H}_{30}\text{BrO}_4$  521.1327; Found 521.1326.

**2-((4-Bromophenyl)(4-hexyl-1-methyl-2-oxocyclopent-3-en-1-yl)methyl)benzofuran-3-yl acetate (3l, major)**

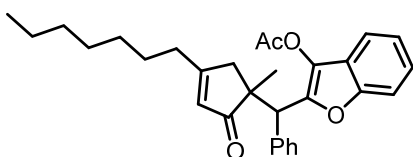

yellowish oil; 52.4 mg, 50% yield;  $^1\text{H}$  NMR (400 MHz,  $\text{CDCl}_3$ ) ( $\delta$ , ppm): 7.48 (d,  $J = 8.0$  Hz, 2H), 7.40 (d,  $J = 8.4$  Hz, 2H), 7.30 (d,  $J = 8.4$  Hz, 2H), 7.16 (d,  $J = 8.4$  Hz, 2H), 5.79 (s, 1H), 4.53 (s, 1H), 3.53 (d,  $J = 18.4$  Hz, 1H), 2.34 (d,  $J = 8.4$  Hz, 1H), 2.29 (s, 3H), 1.28-1.23 (m, 10H), 1.01 (s, 3H), 0.88-0.85 (m, 3H);  $^{13}\text{C}$  NMR (100 MHz,  $\text{CDCl}_3$ ) ( $\delta$ , ppm): 212.1, 181.1, 168.1, 152.4, 145.2, 136.7, 131.7, 131.3, 127.0, 124.5, 123.0, 122.8, 121.4, 119.1, 111.4, 52.0 (4° C), 47.2 (3° C), 43.3 (2° C), 33.6 (2° C), 31.7 (2° C), 29.2 (2° C), 29.1 (2° C), 27.2 (2° C), 24.6 (2° C), 22.7 (2° C), 20.5 (1° C), 14.2 (1° C); IR (KBr,  $\nu$ ,  $\text{cm}^{-1}$ ): 2928, 2857, 1779, 1701, 1617, 1454, 1195, 746; HRMS (ESI -TOF)  $m/z$ :  $[\text{M}+\text{H}]^+$  Calcd for  $\text{C}_{29}\text{H}_{32}\text{BrO}_4$  523.1484; Found 523.1461.

**2-((4-Bromophenyl)(1-methyl-2-oxo-4-(o-tolyl)cyclopent-3-en-1-yl)methyl)benzofuran-3-yl acetate (3m, major)**

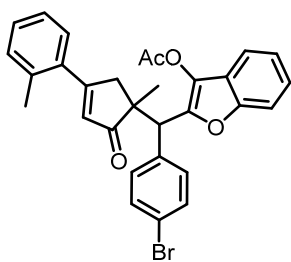

yellowish oil; 77.3 mg, 77% yield;  $^1\text{H NMR}$  (400 MHz,  $\text{CDCl}_3$ ) ( $\delta$ , ppm): 7.52 (d,  $J = 4.0$  Hz, 2H), 7.46 (d,  $J = 8.4$  Hz, 2H), 7.29 (d,  $J = 7.2$  Hz, 4H), 7.25-7.20 (m, 4H), 6.16 (s, 1H), 4.64 (s, 1H), 3.97 (d,  $J = 18.0$  Hz, 1H), 2.77 (d,  $J = 18.4$  Hz, 1H), 2.31 (s, 3H), 2.17 (s, 3H), 1.17 (s, 3H);  $^{13}\text{C NMR}$  (100 MHz,  $\text{CDCl}_3$ ) ( $\delta$ , ppm): 211.8, 173.9, 168.1, 152.4, 145.1, 136.6, 136.0, 135.5, 131.8, 131.3, 130.7, 129.8, 127.2, 126.1, 124.6, 123.1, 122.8, 121.6, 119.1, 111.5, 51.8 ( $4^\circ\text{C}$ ), 47.5 ( $3^\circ\text{C}$ ), 44.2 ( $2^\circ\text{C}$ ), 24.6 ( $1^\circ\text{C}$ ), 21.0 ( $1^\circ\text{C}$ ), 20.6 ( $1^\circ\text{C}$ ); IR (KBr,  $\nu$ ,  $\text{cm}^{-1}$ ): 3062, 2962, 1776, 1698, 1454, 1368, 1194, 747; HRMS (ESI -TOF)  $m/z$ :  $[\text{M}+\text{Na}]^+$  Calcd for  $\text{C}_{30}\text{H}_{25}\text{BrO}_4\text{Na}$  551.0834; Found 551.0842.

**2-((3-Bromophenyl)(1-methyl-2-oxo-4-(o-tolyl)cyclopent-3-en-1-yl)methyl)benzofuran-3-yl acetate (3n, major)**

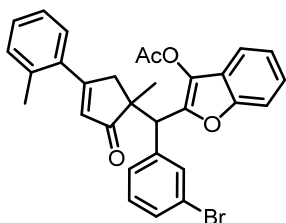

yellowish oil; 46.0 mg, 73% yield;  $^1\text{H NMR}$  (400 MHz,  $\text{CDCl}_3$ ) ( $\delta$ , ppm): 7.52 (d,  $J = 3.9$  Hz, 2H), 7.46 (d,  $J = 8.4$  Hz, 2H), 7.29 (d,  $J = 7.3$  Hz, 4H), 7.25-7.20 (m, 4H), 6.16 (s, 1H), 4.64 (s, 1H), 3.97 (d,  $J = 18.3$  Hz, 1H), 2.97 (d,  $J = 19.2$  Hz, 1H), 2.77 (d,  $J = 18.3$  Hz, 1H), 2.31 (s, 3H), 2.17 (s, 3H), 1.17 (s, 3H);  $^{13}\text{C NMR}$  (100 MHz,  $\text{CDCl}_3$ ) ( $\delta$ , ppm): 212.1, 175.7, 168.1, 152.8, 144.9, 139.8, 135.9, 135.5, 132.0, 131.3, 130.6, 130.2, 129.9, 129.7, 128.8, 127.1, 126.1, 124.6, 123.1, 122.7, 119.2, 111.6, 51.9 ( $4^\circ\text{C}$ ), 47.7 ( $3^\circ\text{C}$ ), 44.20 ( $2^\circ\text{C}$ ), 24.7 ( $1^\circ\text{C}$ ), 20.9 ( $1^\circ\text{C}$ ), 20.5 ( $1^\circ\text{C}$ ); IR (KBr,  $\nu$ ,  $\text{cm}^{-1}$ ): 3062, 2927, 1778, 1698, 1368, 1193, 1094, 746; HRMS (ESI -TOF)  $m/z$ :  $[\text{M}+\text{Na}]^+$  Calcd for  $\text{C}_{30}\text{H}_{25}\text{BrO}_4\text{Na}$  551.0834; Found 551.0851.

**2-((2-Bromophenyl)(1-methyl-2-oxo-4-(o-tolyl)cyclopent-3-en-1-yl)methyl)benzofuran-3-yl acetate (3o, major)**

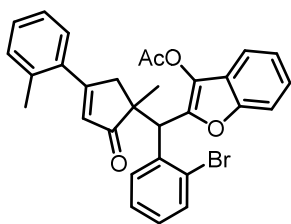

white solid; 79.4 mg, 75% yield; mp: 171.1-177.9  $^\circ\text{C}$ ;  $^1\text{H NMR}$  (400 MHz,  $\text{CDCl}_3$ ) ( $\delta$ , ppm): 7.82 (d,  $J = 7.6$  Hz, 1H), 7.64 (d,  $J = 8.0$  Hz, 1H), 7.37-7.33 (m, 1H), 7.29 (d,  $J = 4.4$  Hz, 4H), 7.25-7.20 (m, 3H), 7.17 (d,  $J = 8.8$  Hz, 2H), 6.19 (s, 1H), 5.51 (s, 1H), 4.05 (d,  $J = 18.4$  Hz, 1H), 2.83 (d,  $J = 18.0$  Hz, 1H), 2.31 (s, 3H), 2.21 (s, 3H), 1.25 (s, 3H);  $^{13}\text{C NMR}$  (100 MHz,  $\text{CDCl}_3$ ) ( $\delta$ , ppm): 211.3, 173.5, 168.3, 152.5, 144.9, 137.1, 135.9, 135.6, 133.5, 131.3, 130.6, 129.9, 129.6, 128.9, 127.7, 127.2, 126.6, 126.1, 124.5, 123.1, 122.9, 119.2, 111.5, 52.5 ( $4^\circ\text{C}$ ), 45.6 ( $3^\circ\text{C}$ ), 44.8 ( $2^\circ\text{C}$ ), 23.9 ( $1^\circ\text{C}$ ), 21.0 ( $1^\circ\text{C}$ ), 20.5 ( $1^\circ\text{C}$ ); IR (KBr,  $\nu$ ,  $\text{cm}^{-1}$ ): 3061, 2963, 1774, 1701, 1454, 1197, 1025, 745; HRMS (ESI -TOF)  $m/z$ :  $[\text{M}+\text{Na}]^+$  Calcd for  $\text{C}_{30}\text{H}_{25}\text{BrO}_4\text{Na}$  551.0834; Found 551.0831.

**2-((1-Methyl-2-oxo-4-(o-tolyl)cyclopent-3-en-1-yl)(p-tolyl)methyl)benzofuran-3-yl acetate (3p, major)**



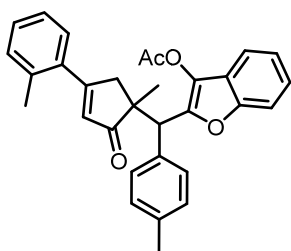

yellowish oil; 44.6 mg, 48% yield;  $^1\text{H NMR}$  (400 MHz,  $\text{CDCl}_3$ ) ( $\delta$ , ppm): 7.44 (d,  $J = 8.0$  Hz, 2H), 7.29 (d,  $J = 6.0$  Hz, 4H), 7.22-7.17 (m, 6H), 6.15 (s, 1H), 4.62 (s, 1H), 3.81 (d,  $J = 19.2$  Hz, 1H), 2.76 (d,  $J = 18.4$  Hz, 1H), 2.40 (s, 3H), 2.26 (s, 3H), 2.17 (s, 3H), 1.17 (s, 3H);  $^{13}\text{C NMR}$  (100 MHz,  $\text{CDCl}_3$ ) ( $\delta$ , ppm): 212.3, 173.9, 168.2, 152.3, 146.0, 137.1, 135.9, 134.4, 131.3, 129.9, 129.3, 129.0, 127.2, 126.1, 124.3, 122.9, 119.0, 111.5, 51.95 ( $4^\circ\text{C}$ ), 47.6 ( $3^\circ\text{C}$ ), 44.4 ( $2^\circ\text{C}$ ), 24.7 ( $1^\circ\text{C}$ ), 21.2 ( $1^\circ\text{C}$ ), 21.0 ( $1^\circ\text{C}$ ), 20.7 ( $1^\circ\text{C}$ ); IR (KBr,  $\nu$ ,  $\text{cm}^{-1}$ ): 3023, 2925, 1778, 1698, 1454, 1368, 1196, 748; HRMS (ESI -TOF)  $m/z$ :  $[\text{M}+\text{H}]^+$  Calcd for  $\text{C}_{31}\text{H}_{29}\text{O}_4$  465.2066; Found 465.2065.

**2-((1-Methyl-2-oxo-4-(o-tolyl)cyclopent-3-en-1-yl)(m-tolyl)methyl)benzofuran-3-yl acetate (3q, major)**

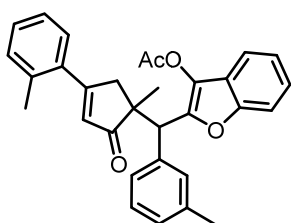

yellowish oil; 58.5 mg, 63% yield;  $^1\text{H NMR}$  (400 MHz,  $\text{CDCl}_3$ ) ( $\delta$ , ppm): 7.54 (d,  $J = 8.4$  Hz, 1H), 7.34 (s, 1H), 7.30-7.27 (m, 6H), 7.17 (d,  $J = 9.2$  Hz, 4H), 6.17 (s, 1H), 4.64 (s, 1H), 3.85 (d,  $J = 19.2$  Hz, 1H), 2.78 (d,  $J = 18.4$  Hz, 1H), 2.41 (s, 3H), 2.25 (s, 3H), 2.19 (s, 3H), 1.18 (s, 3H);  $^{13}\text{C NMR}$  (100 MHz,  $\text{CDCl}_3$ ) ( $\delta$ , ppm): 212.3, 175.6, 168.2, 152.3, 145.9, 138.2, 137.4, 135.9, 131.3, 130.9, 129.9, 129.5, 128.5, 128.2, 127.1, 126.1, 124.1, 123.2, 123.0, 119.0, 111.5, 51.9 ( $4^\circ\text{C}$ ), 48.0 ( $3^\circ\text{C}$ ), 44.5 ( $2^\circ\text{C}$ ), 24.8 ( $1^\circ\text{C}$ ), 21.7 ( $1^\circ\text{C}$ ), 20.9 ( $1^\circ\text{C}$ ), 20.5 ( $1^\circ\text{C}$ ); IR (KBr,  $\nu$ ,  $\text{cm}^{-1}$ ): 3059, 2926, 1779, 1698, 1454, 1190, 1095, 747; HRMS (ESI -TOF)  $m/z$ :  $[\text{M}+\text{H}]^+$  Calcd for  $\text{C}_{31}\text{H}_{29}\text{O}_4$  465.2066; Found 465.2065.

**2-((1-Methyl-2-oxo-4-(o-tolyl)cyclopent-3-en-1-yl)(o-tolyl)methyl)benzofuran-3-yl acetate (3r, major)**

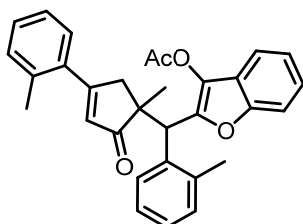

white solid; 71.1 mg, 69% yield; mp: 102.1-107.9  $^\circ\text{C}$ ;  $^1\text{H NMR}$  (400 MHz,  $\text{CDCl}_3$ ) ( $\delta$ , ppm): 7.67 (d,  $J = 7.6$  Hz, 1H), 7.29 (d,  $J = 10.0$  Hz, 2H), 7.26-7.21 (m, 7H), 7.19 (d,  $J = 4.4$  Hz, 1H), 7.16 (d,  $J = 7.2$  Hz, 1H), 6.22 (s, 1H), 5.10 (s, 1H), 4.02 (d,  $J = 18.4$  Hz, 1H), 2.91 (d,  $J = 18.4$  Hz, 1H), 2.49 (s, 3H), 2.18 (s, 3H), 2.17 (s, 3H), 1.18 (s, 3H);  $^{13}\text{C NMR}$  (100 MHz,  $\text{CDCl}_3$ ) ( $\delta$ , ppm): 212.5, 173.9, 168.3, 152.3, 145.5, 137.9, 135.9, 131.2, 131.0, 129.8, 129.5, 129.1, 127.2, 127.1, 126.2, 126.0, 124.4, 122.9, 118.9, 111.6, 52.3 ( $4^\circ\text{C}$ ), 45.1 ( $3^\circ\text{C}$ ), 42.9 ( $2^\circ\text{C}$ ), 24.1 ( $1^\circ\text{C}$ ), 20.9 ( $1^\circ\text{C}$ ), 20.4 ( $1^\circ\text{C}$ ), 20.3 ( $1^\circ\text{C}$ ); IR (KBr,  $\nu$ ,  $\text{cm}^{-1}$ ): 3061, 2961, 1775, 1700, 1454, 1368, 1190, 742; HRMS (ESI -TOF)  $m/z$ :  $[\text{M}+\text{H}]^+$  Calcd for  $\text{C}_{31}\text{H}_{29}\text{O}_4$  465.2066; Found 465.2069.

**2-((1-Methyl-2-oxo-4-(o-tolyl)cyclopent-3-en-1-yl)(thiophen-2-yl)methyl)benzofuran-3-yl acetate (3s, major)**

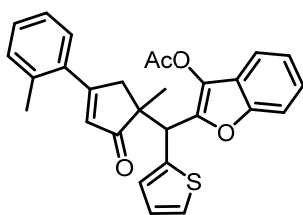

yellowish solid; 76.7 mg, 84% yield; mp: 115.9-120.5 °C; <sup>1</sup>H NMR (400 MHz, CDCl<sub>3</sub>) (δ, ppm): 7.51 (d, *J* = 8.0 Hz, 1H), 7.31-7.28 (m, 5H), 7.19 (d, *J* = 3.2 Hz, 3H), 7.10 (d, *J* = 5.2 Hz, 1H), 6.86-6.84 (m, 1H), 6.17 (s, 1H), 4.99 (s, 1H), 3.91 (d, *J* = 19.2 Hz, 1H), 2.89 (d, *J* = 18.8 Hz, 1H), 2.44 (s, 3H), 2.20 (s, 3H), 1.20 (s, 3H); <sup>13</sup>C NMR (100 MHz, CDCl<sub>3</sub>) (δ, ppm): 212.2, 175.6, 168.2, 152.7, 145.3, 139.3, 136.0, 135.5, 135.5, 131.3, 130.5, 129.7, 128.0, 127.2, 126.5, 126.1, 124.9, 124.8, 123.3, 122.6, 119.3, 111.5, 52.2 (4° C), 44.2 (3° C), 42.5 (2° C), 24.2 (1° C), 21.1 (1° C), 20.7 (1° C); IR (KBr, ν, cm<sup>-1</sup>): 2973, 2899, 1711, 1601, 1457, 1362, 821, 758; HRMS (ESI -TOF) *m/z*: [M+Na]<sup>+</sup> Calcd for C<sub>28</sub>H<sub>24</sub>O<sub>4</sub>SNa 479.1293; Found 479.1267.

**2-((4-Bromophenyl)(2-methyl-1-oxo-1,2,3,4,5,6-hexahydropentalen-2-yl)methyl)benzofuran-3-yl acetate (3t, major)**

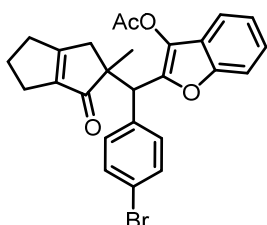

white solid; 56.6 mg, 59% yield; mp: 192.6-193.4 °C; <sup>1</sup>H NMR (400 MHz, CDCl<sub>3</sub>) (δ, ppm): 7.50 (d, *J* = 8.4 Hz, 1H), 7.39-7.27 (m, 5H), 7.16 (d, *J* = 8.0 Hz, 2H), 4.57 (s, 1H), 3.23 (d, *J* = 19.2 Hz, 1H), 2.42 (s, 1H), 2.38 (s, 3H), 2.35-2.09 (m, 6H), 1.12 (s, 3H); <sup>13</sup>C NMR (100 MHz, CDCl<sub>3</sub>) (δ, ppm): 206.3, 168.1, 152.6, 147.2, 146.1, 137.2, 131.2, 130.8, 124.7, 123.3, 122.7, 121.2, 119.1, 111.8, 58.6 (4° C), 46.3 (3° C), 37.2 (2° C), 32.0 (2° C), 27.3 (2° C), 24.6 (2° C), 24.5 (1° C), 20.7 (1° C); IR (KBr, ν, cm<sup>-1</sup>): 2960, 1779, 1695, 1455, 1368, 1193, 1011, 747; HRMS (ESI -TOF) *m/z*: [M+Na]<sup>+</sup> Calcd for C<sub>26</sub>H<sub>23</sub>BrO<sub>4</sub>Na 501.0677; Found 501.0648.

**2-((4-Bromophenyl)(2-methyl-1-oxo-2,3,4,5,6,7-hexahydro-1H-inden-2-yl)methyl)benzofuran-3-yl acetate (3u, major)**

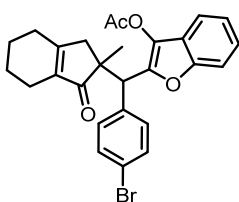

white solid; 63.2 mg, 64% yield; mp: 127.3-128.7 °C; <sup>1</sup>H NMR (400 MHz, CDCl<sub>3</sub>) (δ, ppm): 7.56 (d, *J* = 8.4 Hz, 1H), 7.44-7.32 (m, 5H), 7.18 (d, *J* = 8.4 Hz, 2H), 4.57 (s, 1H), 3.24 (d, *J* = 18.8 Hz, 1H), 2.48 (s, 1H), 2.43 (s, 3H), 2.19-1.87 (m, 4H), 1.72-1.58 (m, 4H), 1.12 (s, 3H); <sup>13</sup>C NMR (100 MHz, CDCl<sub>3</sub>) (δ, ppm): 211.2, 172.9, 168.1, 152.6, 146.1, 137.4, 137.1, 131.1, 130.6, 124.7, 123.3, 122.7, 121.1, 119.1, 111.8, 46.5 (4° C), 41.9 (3° C), 28.3 (2° C), 23.9 (2° C), 22.1 (2° C), 21.6 (2° C), 20.7 (1° C), 20.1 (1° C); IR (KBr, ν, cm<sup>-1</sup>): 2928, 1779, 1695, 1455, 1368, 1193, 1010, 747; HRMS (ESI -TOF) *m/z*: [M+Na]<sup>+</sup> Calcd for C<sub>27</sub>H<sub>25</sub>BrO<sub>4</sub>Na 515.0834; Found 515.0833.

**General Procedure for the Synthesis of Products 5.**

Example for the synthesis of **5a**:

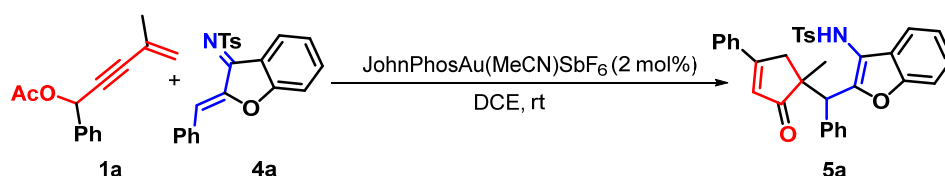

To a 10 mL Schlenk tube under air conditions, 1,3-enyne esters (**1a**, 0.2 mmol, 1 equiv), azadiene (**2a**, 0.2 mmol, 1 equiv), JohnPhosAu(MeCN)SbF<sub>6</sub> (2 mol%), 1,2-dichloroethane (2.5 mL) were successively added. The mixture was stirred at room temperature. The reactions were monitored by TLC. After the reaction was completed (indicated by TLC, petroleum ether : ethyl acetate = 5:1), the reaction mixture was concentrated by vacuum distillation and was purified by flash column chromatography to afford the desired pure product (**5a**, 87.7 mg, 80% yield) as white solid.

#### Gram-Scale Experiment for the Synthesis of Product 5o

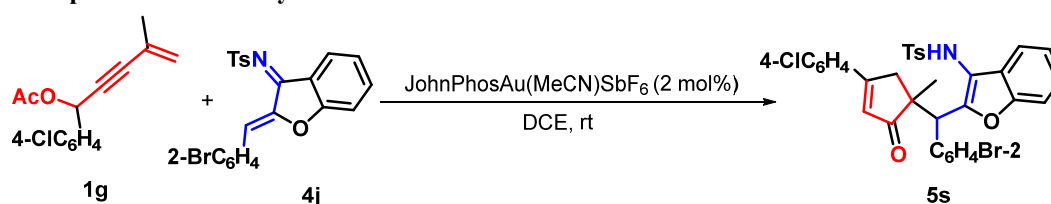

To a 50 mL Schlenk flask under air conditions, 1,3-enyne esters (**1g**, 3 mmol, 1 equiv), azadiene (**4j**, 3 mmol, 1 equiv), JohnPhosAu(MeCN)SbF<sub>6</sub> (2 mol%), 1,2-dichloroethane (15 mL) were successively added. The mixture was stirred at room temperature. The reactions were monitored by TLC. After the reaction was completed (indicated by TLC, petroleum ether: ethyl acetate = 5:1), the reaction mixture was concentrated by vacuum distillation and was purified by flash column chromatography to afford the desired pure product (**5s**, 1.646g, 83% yield) as white solid.

#### 4-Methyl-N-(2-((1-methyl-2-oxo-4-phenylcyclopent-3-en-1-yl)(phenyl)methyl)benzofuran-3-yl)benzenesulfonamide (**5a**, major)

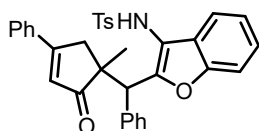

white solid; 87.7 mg, 80% yield; mp: 118.4-119.1 °C; <sup>1</sup>H NMR (400 MHz, CDCl<sub>3</sub>) (δ, ppm): 7.78-7.72 (m, 1H), 7.64 (d, *J* = 8.4 Hz, 2H), 7.58 (d, *J* = 6.8 Hz, 2H), 7.49-7.40 (m, 3H), 7.25-7.13 (m, 8H), 7.08-7.02 (m, 2H), 6.27 (s, 1H), 4.00 (d, *J* = 14.0 Hz, 2H), 2.76 (d, *J* = 18.0 Hz, 1H), 2.41 (s, 3H), 1.03 (s, 3H). <sup>13</sup>C NMR (100 MHz, CDCl<sub>3</sub>) (δ, ppm): 214.1, 174.0, 153.6, 151.4, 143.6, 136.8, 136.3, 133.6, 131.9, 129.9, 129.8, 129.0, 128.2, 127.5, 127.4, 127.1, 125.6, 124.5, 124.2, 123.3, 121.4, 114.6, 111.0, 53.6 (4° C), 46.6 (3° C), 40.1 (2° C), 25.6 (1° C), 21.7 (1° C); IR (KBr, ν, cm<sup>-1</sup>): 3243, 1677, 1570, 1452, 1342, 1166, 737, 574; HRMS (ESI -TOF) *m/z*: [M+Na]<sup>+</sup> Calcd for C<sub>34</sub>H<sub>29</sub>NO<sub>4</sub>SNa 570.1715; Found 570.1715.

#### 4-Methyl-N-(2-((1-methyl-2-oxo-4-(*o*-tolyl)cyclopent-3-en-1-yl)(phenyl)methyl)benzofuran-3-yl)benzenesulfonamide (**5b**, major)

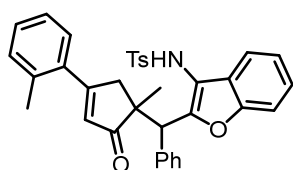

white solid; 70.8 mg, 63% yield; mp: 127.6-128.5 °C; <sup>1</sup>H NMR (400 MHz, CDCl<sub>3</sub>) (δ, ppm): 7.77-7.75 (m, 1H), 7.63 (d, *J* = 8.0 Hz, 2H), 7.30-7.27 (m, 2H), 7.26-7.19 (m, 8H), 7.14-7.03 (m, 6H), 5.97 (s, 1H), 4.07 (d, *J* = 18.4 Hz, 1H), 3.98 (s, 1H), 2.64 (d, *J* = 18.4 Hz, 1H), 2.39 (s, 3H), 2.10 (s, 3H), 1.06 (s, 3H). <sup>13</sup>C NMR (100 MHz, CDCl<sub>3</sub>) (δ, ppm): 214.4,

176.3, 153.6, 151.6, 143.6, 136.7, 136.1, 136.0, 135.1, 131.4, 130.0, 129.9, 129.8, 129.1, 128.2, 127.5, 127.2, 126.2, 124.66, 123.4, 121.5, 114.6, 110.9, 53.0 (4° C), 46.7 (3° C), 43.7 (2° C), 25.1 (1° C), 21.7 (1° C), 21.1 (1° C); IR (KBr,  $\nu$ ,  $\text{cm}^{-1}$ ): 3253, 1682, 1454, 1166, 1093, 750, 566; HRMS (ESI -TOF)  $m/z$ :  $[\text{M}+\text{Na}]^+$  Calcd for  $\text{C}_{35}\text{H}_{31}\text{NO}_4\text{SNa}$  584.1871; Found 584.1874.

**4-Methyl-N-(2-((1-methyl-2-oxo-4-(*m*-tolyl)cyclopent-3-en-1-yl)(phenyl)methyl)benzofuran-3-yl)benzenesulfonamide (5c, major)**

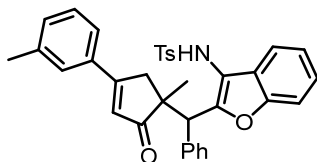

white solid; 82.1 mg, 73% yield; mp: 119.5-120.3 °C;  $^1\text{H}$  NMR (400 MHz,  $\text{CDCl}_3$ ) ( $\delta$ , ppm): 7.78-7.74 (m, 1H), 7.65 (d,  $J = 8.4$  Hz, 2H), 7.38 (d,  $J = 10.0$  Hz, 2H), 7.33-7.27 (m, 4H), 7.26-7.20 (m, 2H), 7.20-7.13 (m, 4H), 7.07-7.04 (m, 2H), 6.25 (s, 1H), 3.97 (d,  $J = 15.6$  Hz, 2H), 2.77 (d,  $J = 16.0$  Hz, 1H), 2.40 (d,  $J = 10.0$  Hz, 6H), 1.03 (s, 3H).  $^{13}\text{C}$  NMR (100 MHz,  $\text{CDCl}_3$ ) ( $\delta$ , ppm): 214.1, 174.3, 153.6, 151.4, 143.5, 138.7, 136.8, 136.3, 133.6, 132.6, 129.9, 129.8, 128.9, 128.2, 127.7, 127.5, 127.3, 125.6, 124.5, 124.3, 124.1, 123.2, 121.4, 114.6, 111.0, 53.6 (4° C), 46.5 (3° C), 40.2 (2° C), 25.6 (1° C), 21.7 (1° C), 21.5 (1° C); IR (KBr,  $\nu$ ,  $\text{cm}^{-1}$ ): 3242, 1677, 1596, 1453, 1166, 1093, 871, 668; HRMS (ESI -TOF)  $m/z$ :  $[\text{M}+\text{Na}]^+$  Calcd for  $\text{C}_{35}\text{H}_{31}\text{NO}_4\text{SNa}$  584.1871; Found 584.1852.

**4-Methyl-N-(2-((1-methyl-2-oxo-4-(*p*-tolyl)cyclopent-3-en-1-yl)(phenyl)methyl)benzofuran-3-yl)benzenesulfonamide (5d, major)**

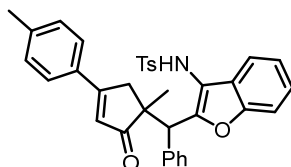

white solid; 64.9 mg, 57% yield; mp: 149.8-150.9 °C;  $^1\text{H}$  NMR (400 MHz,  $\text{CDCl}_3$ ) ( $\delta$ , ppm): 7.76 (d,  $J = 6.8$  Hz, 1H), 7.65 (d,  $J = 8.0$  Hz, 2H), 7.48 (d,  $J = 8.0$  Hz, 2H), 7.29 (s, 1H), 7.26-7.20 (m, 5H), 7.19-7.14 (m, 4H), 7.07-7.01 (m, 2H), 6.23 (s, 1H), 3.99-3.94 (m, 2H), 2.75 (d,  $J = 18.0$  Hz, 1H), 2.40 (d,  $J = 8.8$  Hz, 6H), 1.02 (s, 3H).  $^{13}\text{C}$  NMR (100 MHz,  $\text{CDCl}_3$ ) ( $\delta$ , ppm): 214.1, 174.0, 153.6, 151.4, 143.5, 142.6, 136.8, 136.4, 130.9, 129.9, 129.8, 129.7, 128.2, 127.5, 127.3, 127.2, 125.7, 124.5, 123.3, 123.2, 121.4, 114.6, 111.0, 53.5 (4° C), 46.6 (3° C), 40.1 (2° C), 25.6 (1° C), 21.7 (1° C), 21.7 (1° C); IR (KBr,  $\nu$ ,  $\text{cm}^{-1}$ ): 3225, 1673, 1593, 1453, 1166, 1093, 815, 564; HRMS (ESI -TOF)  $m/z$ :  $[\text{M}+\text{Na}]^+$  Calcd for  $\text{C}_{35}\text{H}_{31}\text{NO}_4\text{SNa}$  584.1871; Found 584.1846.

**N-(2-((4-(4-Chlorophenyl)-1-methyl-2-oxocyclopent-3-en-1-yl)(phenyl)methyl)benzofuran-3-yl)-4-methylbenzenesulfonamide (5e, major)**

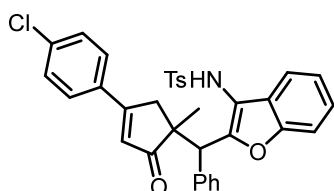

white solid; 102.4 mg, 88% yield; mp: 140.2-141.8 °C;  $^1\text{H}$  NMR (400 MHz,  $\text{CDCl}_3$ ) ( $\delta$ , ppm): 7.75-7.73 (m, 1H), 7.62 (d,  $J = 8.4$  Hz, 2H), 7.50 (d,  $J = 8.4$  Hz, 3H), 7.39 (d,  $J = 8.4$  Hz, 3H), 7.19-7.16 (m, 4H), 7.06-7.02 (m, 3H), 6.88 (d,  $J = 8.0$  Hz, 1H), 6.23 (s, 1H), 3.95 (d,  $J = 18.4$  Hz, 2H), 2.71 (d,  $J = 18.4$  Hz, 1H), 2.40 (s, 3H), 1.03 (s, 3H).  $^{13}\text{C}$  NMR (100 MHz,  $\text{CDCl}_3$ ) ( $\delta$ , ppm): 213.8, 172.3, 153.6, 151.4, 143.6, 137.9, 136.2, 129.9, 129.8, 129.3, 128.4, 128.2, 127.5, 125.6, 124.6, 123.3, 121.4, 114.7, 111.0, 53.7 (4° C), 46.5 (3° C), 40.1 (2° C), 25.5 (1° C), 21.7 (1° C); IR (KBr,  $\nu$ ,  $\text{cm}^{-1}$ ): 3243,

1676, 1490, 1328, 1166, 1091, 828, 574; HRMS (ESI -TOF)  $m/z$ :  $[M+Na]^+$  Calcd for  $C_{34}H_{28}ClNO_4SNa$  604.1325; Found 604.1320.

***(E)-4-Methyl-N-(2-((1-methyl-2-oxo-4-styrylcyclopent-3-en-1-yl)(phenyl)methyl)benzofuran-3-yl)benzenesulfonamide (5f, major)***

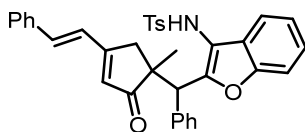

white solid; 66.6 mg, 58% yield; mp: 76.3-77.4 °C;  $^1H$  NMR (400 MHz,  $CDCl_3$ ) ( $\delta$ , ppm): 7.79-7.77 (m, 1H), 7.64 (d,  $J = 8.0$  Hz, 2H), 7.52 (d,  $J = 6.4$  Hz, 2H), 7.41-7.36 (m, 3H), 7.34-7.27 (m, 3H), 7.26 (s, 2H), 7.22-7.18 (m, 2H), 7.16-7.11 (m, 3H), 7.09-7.03 (m, 3H), 5.86 (s, 1H), 3.96 (s, 1H), 3.80 (d,  $J = 17.6$  Hz, 1H), 2.63 (d,  $J = 17.6$  Hz, 1H), 2.41 (s, 3H), 1.00 (s, 3H).  $^{13}C$  NMR (100 MHz,  $CDCl_3$ ) ( $\delta$ , ppm): 214.1, 171.9, 153.7, 151.5, 143.6, 138.0, 136.3, 135.4, 130.0, 129.9, 129.8, 129.1, 128.2, 127.9, 127.6, 127.5, 127.4, 125.7, 124.5, 123.8, 123.3, 121.5, 114.6, 111.1, 53.3 (4° C), 46.6 (3° C), 38.4 (2° C), 25.6 (1° C), 21.7 (1° C); IR (KBr,  $\nu$ ,  $cm^{-1}$ ): 3233, 1674, 1579, 1352, 1166, 1093, 751, 667; HRMS (ESI -TOF)  $m/z$ :  $[M+Na]^+$  Calcd for  $C_{36}H_{31}NO_4SNa$  596.1871; Found 596.1868.

***N-(2-((4-Benzyl-1-methyl-2-oxocyclopent-3-en-1-yl)(phenyl)methyl)benzofuran-3-yl)-4-methylbenzenesulfonamide (5g, major)***

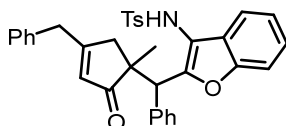

white solid; 60.7 mg, 54% yield; mp: 77.2-78.1 °C;  $^1H$  NMR (400 MHz,  $CDCl_3$ ) ( $\delta$ , ppm): 7.81-7.75 (m, 1H), 7.62 (d,  $J = 8.4$  Hz, 2H), 7.28 (s, 1H), 7.26-7.16 (m, 7H), 7.13 (d,  $J = 8.4$  Hz, 3H), 6.94-6.91 (m, 4H), 5.63 (s, 1H), 3.87 (s, 1H), 3.59 (d,  $J = 22.8$  Hz, 3H), 2.40 (s, 3H), 2.25 (d,  $J = 18.8$  Hz, 1H), 0.90 (s, 3H).  $^{13}C$  NMR (100 MHz,  $CDCl_3$ ) ( $\delta$ , ppm): 214.7, 181.5, 153.5, 151.4, 143.6, 136.3, 136.1, 129.8, 128.9, 128.8, 128.1, 127.5, 127.1, 124.5, 123.3, 121.5, 114.5, 111.1, 53.7 (4° C), 46.4 (2° C), 42.6 (3° C), 40.2 (2° C), 25.0 (1° C), 21.7 (1° C); IR (KBr,  $\nu$ ,  $cm^{-1}$ ): 3251, 1683, 1454, 1344, 1166, 1093, 736, 668; HRMS (ESI -TOF)  $m/z$ :  $[M+Na]^+$  Calcd for  $C_{35}H_{31}NO_4SNa$  584.1871; Found 584.1869.

***N-(2-((4-(tert-Butyl)-1-methyl-2-oxocyclopent-3-en-1-yl)(phenyl)methyl)benzofuran-3-yl)-4-methylbenzenesulfonamide (5h, major)***

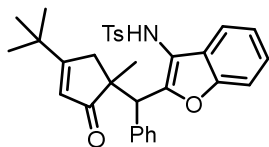

white solid; 55.9 mg, 53% yield; mp: 90.2-91.8 °C;  $^1H$  NMR (400 MHz,  $CDCl_3$ ) ( $\delta$ , ppm): 7.78-7.76 (m, 1H), 7.61 (d,  $J = 8.4$  Hz, 2H), 7.31-7.28 (m, 1H), 7.26-7.18 (m, 5H), 7.14-7.06 (m, 3H), 6.98 (d,  $J = 6.0$  Hz, 2H), 5.62 (s, 1H), 3.86 (s, 1H), 3.66 (d,  $J = 18.4$  Hz, 1H), 2.38 (s, 3H), 2.30 (d,  $J = 18.8$  Hz, 1H), 1.06 (s, 9H), 0.93 (s, 3H).  $^{13}C$  NMR (100 MHz,  $CDCl_3$ ) ( $\delta$ , ppm): 215.3, 191.9, 153.6, 151.6, 143.5, 136.7, 136.2, 129.8, 128.1, 127.4, 125.6, 124.6, 124.2, 123.3, 121.5, 114.4, 110.8(1), 110.8(0), 53.2 (4° C), 46.5 (4° C), 39.2 (3° C), 35.4 (1° C), 28.6 (2° C), 25.0 (1° C), 21.7 (1° C); IR (KBr,  $\nu$ ,  $cm^{-1}$ ): 3258, 2967, 1683, 1598, 1454, 1167, 738, 565; HRMS (ESI -TOF)  $m/z$ :  $[M+Na]^+$  Calcd for  $C_{32}H_{33}NO_4SNa$  550.2028; Found 550.2028.

***N-(2-((4-Cyclohexyl-1-methyl-2-oxocyclopent-3-en-1-yl)(phenyl)methyl)benzofuran-3-yl)-4-methylbenzenesulfonamide (5i, major)***

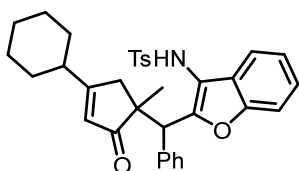

white solid; 83.1 mg, 75% yield; mp: 53.2-54.8 °C; <sup>1</sup>H NMR (400 MHz, CDCl<sub>3</sub>) (δ, ppm): 8.19 (s, 1H), 7.90 (d, *J* = 6.8 Hz, 1H), 7.53 (d, *J* = 7.6 Hz, 1H), 7.38-7.29 (m, 4H), 7.12-7.02 (m 3H), 6.93 (d, *J* = 7.6 Hz, 2H), 6.75 (d, *J* = 6.0 Hz, 2H), 5.92 (s, 1H), 4.71 (s, 1H), 3.27 (d, *J* = 19.6 Hz, 1H), 2.42-2.36 (m, 1H), 2.16 (s, 3H), 2.10 (d, *J* = 11.6 Hz, 1H), 1.69-1.57 (m, 5H), 1.27-1.08 (m, 4H), 0.90 (s, 3H). <sup>13</sup>C NMR (100 MHz, CDCl<sub>3</sub>) (δ, ppm): 214.8, 188.6, 153.6, 137.8, 135.8, 129.2, 128.7, 127.8, 127.0, 126.5, 124.6, 123.4, 121.5, 111.1, 52.1 (4° C), 46.1 (3° C), 42.0 (3° C), 41.3 (2° C), 31.2 (2° C), 25.9 (2° C), 23.8 (1° C), 21.7 (1° C); IR (KBr, ν, cm<sup>-1</sup>): 2928, 2852, 1674, 1453, 1338, 1166, 1093, 737; HRMS (ESI -TOF) *m/z*: [M+Na]<sup>+</sup> Calcd for C<sub>34</sub>H<sub>35</sub>NO<sub>4</sub>SNa 576.2184; Found 576.2167.

***N*-(2-((4-Heptyl-1-methyl-2-oxocyclopent-3-en-1-yl)(phenyl)methyl)benzofuran-3-yl)-4-methylbenzenesulfonamide (5j, major)**

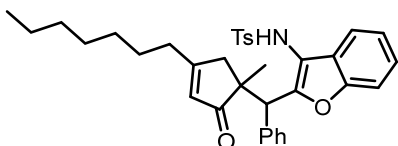

white solid; 78.6 mg, 69% yield; mp: 74.6-75.8 °C; <sup>1</sup>H NMR (400 MHz, CDCl<sub>3</sub>) (δ, ppm): 7.85-7.80 (m, 1H), 7.67 (d, *J* = 8.4 Hz, 2H), 7.38-7.36 (m, 1H), 7.31-7.27 (m, 4H), 7.24 (d, *J* = 2.8 Hz, 1H), 7.18 (d, *J* = 8.0 Hz, 2H), 7.03-7.00 (m, 2H), 5.69 (s, 1H), 3.93 (s, 1H), 3.66 (d, *J* = 18.8 Hz, 1H), 2.44 (s, 3H), 2.38-2.33 (m, 2H), 2.28 (d, *J* = 7.2 Hz, 1H), 1.49-1.44 (m, 2H), 1.31-1.19 (m, 7H), 0.97 (s, 3H), 0.94-0.90 (m, 3H). <sup>13</sup>C NMR (100 MHz, CDCl<sub>3</sub>) (δ, ppm): 213.7, 173.4, 144.3, 143.4, 136.2, 135.5, 131.5, 130.5, 129.7, 128.6, 128.3, 127.3, 126.9, 126.6, 126.2, 123.8, 47.9 (4° C), 45.7 (3° C), 41.8 (2° C), 37.2 (2° C), 36.9 (2° C), 32.0 (2° C), 24.1 (2° C), 23.9 (2° C), 21.9 (2° C), 21.6 (2° C), 21.2 (2° C), 14.1 (1° C), 13.7 (1° C); IR (KBr, ν, cm<sup>-1</sup>): 2928, 1675, 1454, 1343, 1167, 1092, 749, 669; HRMS (ESI -TOF) *m/z*: [M+Na]<sup>+</sup> Calcd for C<sub>35</sub>H<sub>39</sub>NO<sub>4</sub>SNa 592.2497; Found 592.2496.

***4*-Methyl-*N*-(2-((2-methyl-1-oxo-1,2,3,4,5,6-hexahydropentalen-2-yl)(phenyl)methyl)benzofuran-3-yl)benzenesulfonamide (5k, major)**

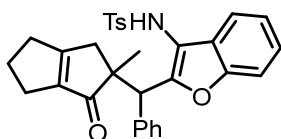

white solid; 44.0 mg, 43% yield; mp: 78.4-79.7 °C; <sup>1</sup>H NMR (400 MHz, CDCl<sub>3</sub>) (δ, ppm): 7.81-7.76 (m, 1H), 7.62 (d, *J* = 8.4 Hz, 2H), 7.35-7.31 (m, 1H), 7.25-7.19 (m, 5H), 7.13 (d, *J* = 8.0 Hz, 2H), 6.98-6.92 (m, 2H), 3.86 (s, 1H), 3.47 (d, *J* = 18.8 Hz, 1H), 2.42 (d, *J* = 18.0 Hz, 1H), 2.40 (s, 3H), 2.38-2.34 (m, 1H), 2.25-2.15 (m, 3H), 2.05-2.01 (m, 2H), 0.95 (s, 3H). <sup>13</sup>C NMR (100 MHz, CDCl<sub>3</sub>) (δ, ppm): 208.7, 187.6, 153.5, 151.5, 145.9, 143.5, 136.7, 136.2, 129.8, 129.7, 128.0, 127.4, 127.2, 125.7, 124.4, 123.2, 121.4, 114.4, 110.8, 59.8 (4° C), 46.8 (3° C), 37.3 (2° C), 32.3 (2° C), 27.0 (2° C), 25.2 (2° C), 24.5 (1° C), 21.7 (1° C); IR (KBr, ν, cm<sup>-1</sup>): 3237, 2961, 1677, 1452, 1380, 1166, 1093, 747; HRMS (ESI -TOF) *m/z*: [M+Na]<sup>+</sup> Calcd for C<sub>31</sub>H<sub>29</sub>NO<sub>4</sub>SNa 534.1715; Found 534.1724.

***4*-Methyl-*N*-(2-((2-methyl-1-oxo-2,3,4,5,6,7-hexahydro-1H-inden-2-yl)(phenyl)methyl)benzofuran-3-yl)benzenesulfonamide (5l, major)**

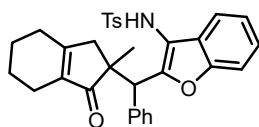

white solid; 62.0 mg, 59% yield; mp: 55.7-56.9 °C; <sup>1</sup>H NMR (400 MHz, CDCl<sub>3</sub>) (δ, ppm): 7.81-7.75 (m, 1H), 7.62 (d, *J* = 8.0 Hz, 2H), 7.35-7.33 (m, 1H), 7.25-7.18 (m, 5H), 7.16-7.10 (m, 3H), 6.97 (d, *J* = 6.8 Hz, 2H), 3.83 (s, 1H), 3.42 (d, *J* = 18.0 Hz, 1H), 2.39 (s, 3H), 2.17 (d, *J* = 18.4 Hz, 3H), 1.91 (d, *J* = 16.0 Hz, 1H), 1.72 (d, *J* = 17.2 Hz, 1H), 1.57-1.52 (m, 1H), 1.43 (s, 2H), 1.17 (d, *J* = 11.2 Hz, 1H), 0.91 (s, 3H). <sup>13</sup>C NMR (100 MHz, CDCl<sub>3</sub>) (δ, ppm): 213.8, 174.6, 153.6, 151.6, 143.6, 143.5, 136.7, 136.2, 129.9, 129.8, 128.0, 127.4, 127.2, 125.8, 124.5, 123.3, 121.4, 114.3, 110.9, 110.8, 52.7 (4° C), 46.9 (3° C), 41.9 (2° C), 28.7 (2° C), 24.6 (2° C), 21.9 (2° C), 21.7 (2° C), 21.2 (1° C), 19.8 (1° C); IR (KBr, ν, cm<sup>-1</sup>): 3246, 2929, 1682, 1496, 1166, 1093, 738, 662; HRMS (ESI -TOF) *m/z*: [M+Na]<sup>+</sup> Calcd for C<sub>32</sub>H<sub>31</sub>NO<sub>4</sub>SNa 548.1871; Found 548.1885.

*N*-(2-(((5*aS*,5*bS*,11*bS*,13*aS*)-9-(benzyloxy)-2,13*a*-dimethyl-3-oxo-2,3,4,5,5*a*,5*b*,6,7,11*b*,12,13,13*a*-dodecahydro-1*H*-cyclopenta[*a*]chrysen-2-yl)(phenyl)methyl)benzofuran-3-yl)-4-methylbenzenesulfonamide (5*m*, major)

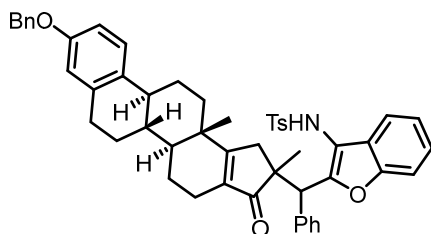

white solid; 120.8 mg, 74% yield; mp: 63.2-66.1 °C; <sup>1</sup>H NMR (400 MHz, CDCl<sub>3</sub>) (δ, ppm): 7.79-7.77 (m, 1H), 7.62 (d, *J* = 8.4 Hz, 2H), 7.45-7.32 (m, 6H), 7.24-7.21 (m, 6H), 7.12 (d, *J* = 8.0 Hz, 2H), 7.08 (s, 1H), 7.00 (d, *J* = 6.4 Hz, 2H), 6.83-6.80 (m, 1H), 6.72 (d, *J* = 2.4 Hz, 1H), 5.05 (s, 2H), 3.85 (s, 1H), 3.55-3.48 (m, 1H), 2.84-2.77 (m, 2H), 2.41 (d, *J* = 5.6 Hz, 1H), 2.39 (s, 3H), 2.22-2.08 (m, 3H), 2.02-1.97 (m, 2H), 1.83-1.78 (m, 1H), 1.66-1.54 (m, 3H), 1.37-1.29 (m, 1H), 1.21-1.04 (m, 2H), 0.94 (d, *J* = 11.2 Hz, 6H), 0.74-0.69 (m, 1H). <sup>13</sup>C NMR (100 MHz, CDCl<sub>3</sub>) (δ, ppm): 214.7, 182.6, 157.0, 153.5, 151.6, 143.5, 138.0, 137.3, 136.7, 136.2, 133.9, 132.8, 129.9, 129.8, 128.7, 128.1, 128.0, 127.5, 127.4, 127.3, 126.2, 125.8, 124.5, 123.4, 121.4, 114.6, 114.3, 112.6, 110.9, 70.1 (4° C), 52.8 (3° C), 47.0 (3° C), 46.8 (3° C), 43.4 (3° C), 38.3 (4° C), 37.6 (2° C), 36.6 (3° C), 35.2 (2° C), 30.0 (2° C), 26.5 (2° C), 25.9 (2° C), 24.3 (2° C), 21.7 (1° C), 20.4 (2° C), 19.2 (1° C), 18.2 (1° C); IR (KBr, ν, cm<sup>-1</sup>): 2926, 1679, 1498, 1379, 1249, 1166, 1027, 737; HRMS (ESI -TOF) *m/z*: [M+H]<sup>+</sup> Calcd for C<sub>53</sub>H<sub>54</sub>NO<sub>5</sub>S 802.3566; Found 802.3572.

4-methyl-*N*-(2-(phenyl((5*aS*,5*bR*,7*aS*,11*aS*,11*bS*,13*aS*)-2,11*a*,13*a*-trimethyl-3-oxo-9-((tetrahydro-2*H*-pyran-2-yl)oxy)-2,3,4,5,5*a*,5*b*,6,7,7*a*,8,9,10,11,11*a*,11*b*,12,13,13*a*-octadecahydro-1*H*-cyclopenta[*a*]chrysen-2-yl)methyl)benzofuran-3-yl)benzenesulfonamide (5*n*, major)

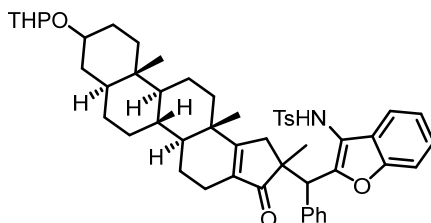

white solid; 83.2 mg, 51% yield; mp: 54.2-55.8 °C; <sup>1</sup>H NMR (400 MHz, CDCl<sub>3</sub>) (δ, ppm): 7.77-7.75 (m, 1H), 7.61 (d, *J* = 8.0 Hz, 2H), 7.36-7.32 (m, 1H), 7.26-7.16 (m, 5H), 7.15-7.08 (m, 3H), 6.96 (d, *J* = 6.4 Hz, 2H), 4.73 (s, 1H), 3.82 (d, *J* = 2.4 Hz, 1H), 3.62-3.41 (m, 2H), 2.38 (s, 3H), 2.14 (d, *J* = 18.0 Hz, 1H), 2.03 (s, 2H), 1.92-1.45 (m, 14H), 1.42-1.12 (m, 7H), 1.10-0.94 (m, 3H), 0.89 (d, *J* = 7.2 Hz, 6H), 0.79 (d, *J* = 6.8 Hz, 3H), 0.63-0.45 (m, 3H). <sup>13</sup>C NMR (100 MHz, CDCl<sub>3</sub>) (δ, ppm): 214.7, 182.7, 170.8, 153.5, 151.6, 143.5, 136.7, 136.2, 133.8, 129.9, 129.8, 128.0, 127.4, 127.2, 125.8,

124.4, 123.3, 121.4, 114.3, 111.0, 73.6 (4° C), 53.7 (2° C), 52.8 (4° C), 47.8 (3° C), 47.0 (3° C), 44.2 (3° C), 37.5 (4° C), 36.7 (2° C), 35.9 (3° C), 35.7 (4° C), 35.3 (3° C), 34.6 (2° C), 33.9 (2° C), 31.4 (2° C), 31.0, (2° C) 28.4 (2° C), 27.5 (2° C), 25.6 (2° C), 24.3 (2° C), 21.7 (2° C), 21.6 (1° C), 20.4 (2° C), 20.2 (2° C), 19.1 (1° C), 18.2 (1° C), 12.3 (1° C); IR (KBr,  $\nu$ ,  $\text{cm}^{-1}$ ): 2936, 1730, 1635, 1452, 1351, 1167, 1027, 737; HRMS (ESI -TOF)  $m/z$ :  $[\text{M}+\text{H}]^+$  Calcd for  $\text{C}_{51}\text{H}_{61}\text{NO}_6\text{SNa}$  838.4117; Found 838.4119.

**3-(4-Chlorophenyl)-5-((3-((4-methoxyphenyl)amino)benzofuran-2-yl)(phenyl)methyl)-5-methylcyclopent-2-en-1-one (5o, major)**

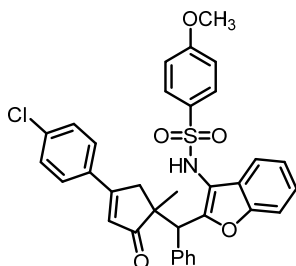

white solid; 49.0 mg, 41% yield; mp: 55.1-56.3 °C;  $^1\text{H}$  NMR (400 MHz,  $\text{CDCl}_3$ ) ( $\delta$ , ppm): 7.77-7.71 (m, 1H), 7.64 (d,  $J = 8.8$  Hz, 2H), 7.50 (d,  $J = 8.8$  Hz, 2H), 7.39 (d,  $J = 8.4$  Hz, 2H), 7.25 (d,  $J = 2.0$  Hz, 2H), 7.18 (d,  $J = 6.8$  Hz, 3H), 7.09 (d,  $J = 4.4$  Hz, 3H), 6.76 (d,  $J = 8.8$  Hz, 2H), 6.23 (s, 1H), 3.98-3.94 (m, 2H), 3.80 (s, 3H), 2.69 (d,  $J = 18.0$  Hz, 1H), 1.03 (s, 3H).  $^{13}\text{C}$  NMR (100 MHz,  $\text{CDCl}_3$ ) ( $\delta$ , ppm): 213.7, 172.2, 163.1, 153.6, 151.4, 137.9, 136.2, 132.1, 131.1, 129.9, 129.5, 129.3, 128.4, 128.2, 127.4, 125.6, 124.6, 123.3, 121.4, 114.8, 114.3, 111.0, 55.6 (4° C), 53.7 (1° C), 46.6 (3° C), 40.0 (2° C), 25.5 (1° C); IR (KBr,  $\nu$ ,  $\text{cm}^{-1}$ ): 3244, 1679, 1596, 1454, 1262, 1092, 830, 738; HRMS (ESI -TOF)  $m/z$ :  $[\text{M}+\text{Na}]^+$  Calcd for  $\text{C}_{34}\text{H}_{28}\text{ClNO}_5\text{SNa}$  620.1274; Found 620.1266.

**5-((3-((4-tert-Butyl)phenyl)amino)benzofuran-2-yl)(phenyl)methyl)-3-(4-chlorophenyl)-5-methylcyclopent-2-en-1-one (5p, major)**

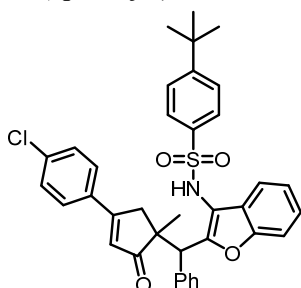

white solid; 98.6 mg, 79% yield; mp: 59.1-60.5 °C;  $^1\text{H}$  NMR (400 MHz,  $\text{CDCl}_3$ ) ( $\delta$ , ppm): 7.77 (d,  $J = 8.8$  Hz, 2H), 7.58-7.51 (m, 3H), 7.46-7.38 (m, 5H), 7.28 (s, 1H), 7.19-7.12 (m, 5H), 7.10 (s, 1H), 6.27 (s, 1H), 4.18 (s, 1H), 3.96 (d,  $J = 18.0$  Hz, 1H), 2.76 (d,  $J = 17.6$  Hz, 1H), 1.35 (s, 9H), 1.04 (s, 3H).  $^{13}\text{C}$  NMR (100 MHz,  $\text{CDCl}_3$ ) ( $\delta$ , ppm): 213.8, 172.2, 156.6, 153.5, 151.7, 137.9, 137.3, 136.5, 132.1, 129.9, 129.3, 128.5, 128.4, 127.5, 126.2, 125.7, 124.6, 124.5, 123.2, 121.1, 114.6, 111.0, 53.7 (4° C), 46.7 (3° C), 40.3 (2° C), 35.3 (4° C), 31.3 (1° C), 25.6 (1° C); IR (KBr,  $\nu$ ,  $\text{cm}^{-1}$ ): 3239, 2965, 1678, 1328, 1169, 1090, 829, 738; HRMS (ESI -TOF)  $m/z$ :  $[\text{M}+\text{Na}]^+$  Calcd for  $\text{C}_{37}\text{H}_{34}\text{ClNO}_4\text{SNa}$  646.1795; Found 646.1782.

**N-(2-((3-Bromophenyl)(4-(4-chlorophenyl)-1-methyl-2-oxocyclopent-3-en-1-yl)methyl)benzofuran-3-yl)-4-methylbenzenesulfonamide (5q, major)**



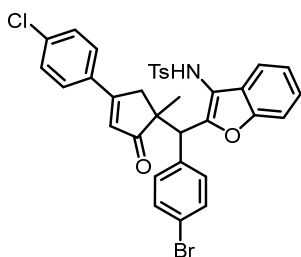

white solid; 89.9 mg, 68% yield; mp: 84.8-85.3 °C; <sup>1</sup>H NMR (400 MHz, CDCl<sub>3</sub>) (δ, ppm): 7.70-7.66 (m, 1H), 7.60 (d, *J* = 8.4 Hz, 2H), 7.49 (d, *J* = 8.8 Hz, 2H), 7.41-7.36 (m, 4H), 7.18 (d, *J* = 4.0 Hz, 3H), 7.12 (d, *J* = 8.0 Hz, 2H), 7.08 (s, 1H), 6.95 (d, *J* = 8.8 Hz, 2H), 6.22 (s, 1H), 3.96 (s, 1H), 3.88 (d, *J* = 18.0 Hz, 1H), 2.67 (d, *J* = 17.6 Hz, 1H), 2.40 (s, 3H), 1.03 (s, 3H). <sup>13</sup>C NMR (100 MHz, CDCl<sub>3</sub>) (δ, ppm): 213.3, 172.2, 153.6, 150.9, 143.7, 138.1, 136.7, 135.3, 132.0, 131.5, 131.4, 129.8, 129.4, 128.4, 127.5, 125.5, 124.8, 124.6, 123.5, 121.4, 115.0, 111.0, 53.5 (4° C), 46.0 (3° C), 39.9 (2° C), 25.4 (1° C), 21.8 (1° C); IR (KBr, ν, cm<sup>-1</sup>): 2925, 1683, 1596, 1489, 1165, 1091, 747; HRMS (ESI -TOF) *m/z*: [M+Na]<sup>+</sup> Calcd for C<sub>34</sub>H<sub>27</sub>BrClNO<sub>4</sub>SNa 682.0430; Found 682.0421.

***N*-(2-((3-Bromophenyl)(4-(4-chlorophenyl)-1-methyl-2-oxocyclopent-3-en-1-yl)methyl)benzofuran-3-yl)-4-methylbenzenesulfonamide (5r, major)**

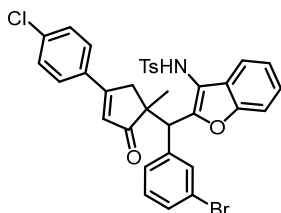

white solid; 104.4 mg, 79% yield; mp: 89.8-91.2 °C; <sup>1</sup>H NMR (400 MHz, CDCl<sub>3</sub>) (δ, ppm): 7.73 (d, *J* = 6.4 Hz, 1H), 7.67-7.60 (m, 3H), 7.44-7.38 (m, 5H), 7.23-7.15 (m, 7H), 6.92-6.84 (m, 1H), 6.25 (d, *J* = 12.8 Hz, 1H), 5.30 (s, 1H), 4.02 (s, 1H), 3.91 (d, *J* = 17.6 Hz, 1H), 2.75 (d, *J* = 18.0 Hz, 1H), 2.41 (s, 3H), 1.05 (s, 3H). <sup>13</sup>C NMR (100 MHz, CDCl<sub>3</sub>) (δ, ppm): 213.6, 174.0, 153.6, 150.6, 143.8, 138.7, 136.8, 133.5, 132.7, 132.0, 130.6, 129.8, 129.0, 128.5, 127.4, 127.2, 125.5, 124.7, 124.2, 123.4, 122.3, 121.4, 115.0, 111.1, 53.5 (4° C), 46.2 (3° C), 39.9 (2° C), 25.6 (1° C), 21.9 (1° C); IR (KBr, ν, cm<sup>-1</sup>): 3243, 1676, 1596, 1453, 1166, 1092, 749; HRMS (ESI -TOF) *m/z*: [M+Na]<sup>+</sup> Calcd for C<sub>34</sub>H<sub>27</sub>BrClNO<sub>4</sub>SNa 682.0430; Found 682.0419.

***N*-(2-((2-Bromophenyl)(4-(4-chlorophenyl)-1-methyl-2-oxocyclopent-3-en-1-yl)methyl)benzofuran-3-yl)-4-methylbenzenesulfonamide (5s, major)**

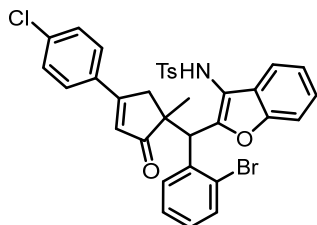

white solid; 121.6 mg, 92% yield; mp: 118.7-119.1 °C; <sup>1</sup>H NMR (400 MHz, CDCl<sub>3</sub>) (δ, ppm): 8.08-8.05 (m, 1H), 7.65-7.60 (m, 3H), 7.59-7.55 (m, 3H), 7.47-7.39 (m, 3H), 7.26-7.17 (m, 4H), 7.09 (d, *J* = 8.4 Hz, 2H), 7.01 (s, 1H), 6.30 (s, 1H), 5.26 (s, 1H), 4.05-4.00 (m, 1H), 2.76-2.71 (m, 1H), 2.36 (s, 3H), 1.25 (s, 3H). <sup>13</sup>C NMR (100 MHz, CDCl<sub>3</sub>) (δ, ppm): 212.4, 171.3, 153.5, 150.2, 143.6, 137.8, 137.0, 136.3, 133.5, 132.3, 130.8, 129.6, 129.3, 128.3, 127.4, 126.8, 125.0, 123.3, 121.7, 115.7, 111.0, 54.8 (4° C), 43.7 (3° C), 40.7 (2° C), 24.8 (1° C), 21.6 (1° C); IR (KBr, ν, cm<sup>-1</sup>): 3244, 1682, 1597, 1454, 1327, 1164, 738, 565; HRMS (ESI -TOF) *m/z*: [M+Na]<sup>+</sup> Calcd for C<sub>34</sub>H<sub>27</sub>BrClNO<sub>4</sub>SNa 682.0430; Found 682.0430.

***N*-2-((4-(4-Chlorophenyl)-1-methyl-2-oxocyclopent-3-en-1-yl)(*p*-tolyl)methyl)benzofuran-3-yl)-4-methylbenzenesulfonamide (**5t**, major)**

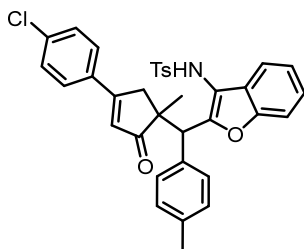

white solid; 71.5 mg, 60% yield; mp: 107.6-108.0 °C; <sup>1</sup>H NMR (400 MHz, CDCl<sub>3</sub>) (δ, ppm): 7.76-7.70 (m, 1H), 7.63 (d, *J* = 8.4 Hz, 2H), 7.50 (d, *J* = 8.4 Hz, 2H), 7.39 (d, *J* = 8.4 Hz, 2H), 7.19-7.12 (m, 5H), 7.05 (d, *J* = 7.6 Hz, 2H), 6.91 (d, *J* = 8.0 Hz, 2H), 6.23 (s, 1H), 4.03-3.81 (m, 2H), 2.72-2.67 (m, 1H), 2.38 (d, *J* = 22.4 Hz, 6H), 1.02 (s, 3H). <sup>13</sup>C NMR (100 MHz, CDCl<sub>3</sub>) (δ, ppm): 213.9, 172.3, 153.6, 151.7, 143.6, 137.9, 137.0, 136.8, 133.1, 132.1, 129.8, 129.3, 128.9, 128.4, 127.5, 124.5, 123.3, 121.4, 114.5, 111.0, 53.7 (4° C), 46.2 (3° C), 40.1 (2° C), 25.5 (1° C), 21.7 (1° C), 21.2 (1° C); IR (KBr, ν, cm<sup>-1</sup>): 3224, 1660, 1591, 1436, 1166, 1091, 750; HRMS (ESI -TOF) *m/z*: [M+Na]<sup>+</sup> Calcd for C<sub>35</sub>H<sub>30</sub>ClNO<sub>4</sub>SNa 618.1482; Found 618.1460.

***N*-2-((4-(4-Chlorophenyl)-1-methyl-2-oxocyclopent-3-en-1-yl)(*m*-tolyl)methyl)benzofuran-3-yl)-4-methylbenzenesulfonamide (**5u**, major)**

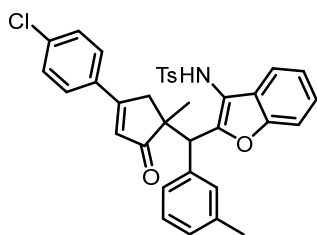

white solid; 77.5 mg, 65% yield; mp: 125.4-126.7 °C; <sup>1</sup>H NMR (400 MHz, CDCl<sub>3</sub>) (δ, ppm): 7.78-7.76 (m, 1H), 7.70 (d, *J* = 8.0 Hz, 2H), 7.56 (d, *J* = 8.4 Hz, 2H), 7.44 (d, *J* = 8.8 Hz, 2H), 7.26-7.16 (m, 7H), 7.13 (d, *J* = 7.6 Hz, 1H), 6.94 (s, 1H), 6.89 (d, *J* = 7.6 Hz, 1H), 6.29 (s, 1H), 5.35 (s, 1H), 4.04 (s, 1H), 4.01-3.94 (m, 1H), 2.76 (d, *J* = 18.0 Hz, 1H), 2.42 (d, *J* = 10.4 Hz, 6H), 1.08 (s, 3H). <sup>13</sup>C NMR (100 MHz, CDCl<sub>3</sub>) (δ, ppm): 213.9, 172.3, 153.6, 151.5, 143.5, 137.8, 136.9, 136.1, 132.2, 130.4, 129.7, 129.3, 128.4, 128.2, 128.1, 127.5, 127.0, 125.7, 124.61, 123.3, 121.4, 114.6, 111.0, 53.6 (4° C), 46.5 (3° C), 40.2 (2° C), 25.5 (1° C), 21.8 (1° C), 21.7 (1° C); IR (KBr, ν, cm<sup>-1</sup>): 3231, 1679, 1454, 1165, 1091, 748, 667; HRMS (ESI -TOF) *m/z*: [M+Na]<sup>+</sup> Calcd for C<sub>35</sub>H<sub>30</sub>ClNO<sub>4</sub>SNa 618.1482; Found 618.1465.

***N*-2-((4-(4-Chlorophenyl)-1-methyl-2-oxocyclopent-3-en-1-yl)(*o*-tolyl)methyl)benzofuran-3-yl)-4-methylbenzenesulfonamide (**5v**, major)**

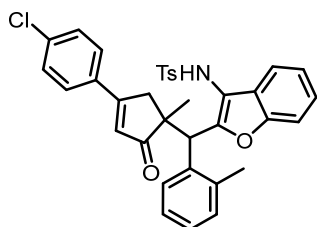

white solid; 81.1 mg, 68% yield; mp: 80.8-81.4 °C; <sup>1</sup>H NMR (400 MHz, CDCl<sub>3</sub>) (δ, ppm): 7.96 (d, *J* = 7.6 Hz, 1H), 7.65 (d, *J* = 8.4 Hz, 2H), 7.54 (d, *J* = 8.8 Hz, 2H), 7.40 (d, *J* = 8.8 Hz, 2H), 7.30 (s, 1H), 7.24 (d, *J* = 8.8 Hz, 1H), 7.21-7.19 (m, 1H), 7.17-7.09 (m, 5H), 7.067.03 (m, 1H), 6.28 (s, 1H), 4.95 (s, 1H), 4.05 (d, *J* = 17.6 Hz, 1H), 2.79 (d, *J* = 18.0 Hz, 1H), 2.39 (s, 3H), 2.15 (s, 3H), 1.12 (s, 3H). <sup>13</sup>C NMR (100 MHz, CDCl<sub>3</sub>) (δ, ppm): 213.7, 172.0, 153.4, 152.1, 143.7, 138.0, 137.6, 135.2, 132.2, 131.0, 129.7, 129.3, 128.4, 127.3, 126.2, 124.5, 123.0, 120.8, 114.8, 111.1, 54.8 (4° C), 40.8 (3° C), 40.6 (2° C), 24.8 (1° C), 21.6 (1° C), 20.5 (1° C); IR (KBr, ν, cm<sup>-1</sup>): 3245, 1682, 1597, 1327, 1164, 1013, 740, 667; HRMS (ESI -TOF) *m/z*: [M+Na]<sup>+</sup> Calcd for C<sub>35</sub>H<sub>30</sub>ClNO<sub>4</sub>SNa 618.1482; Found 618.1479.

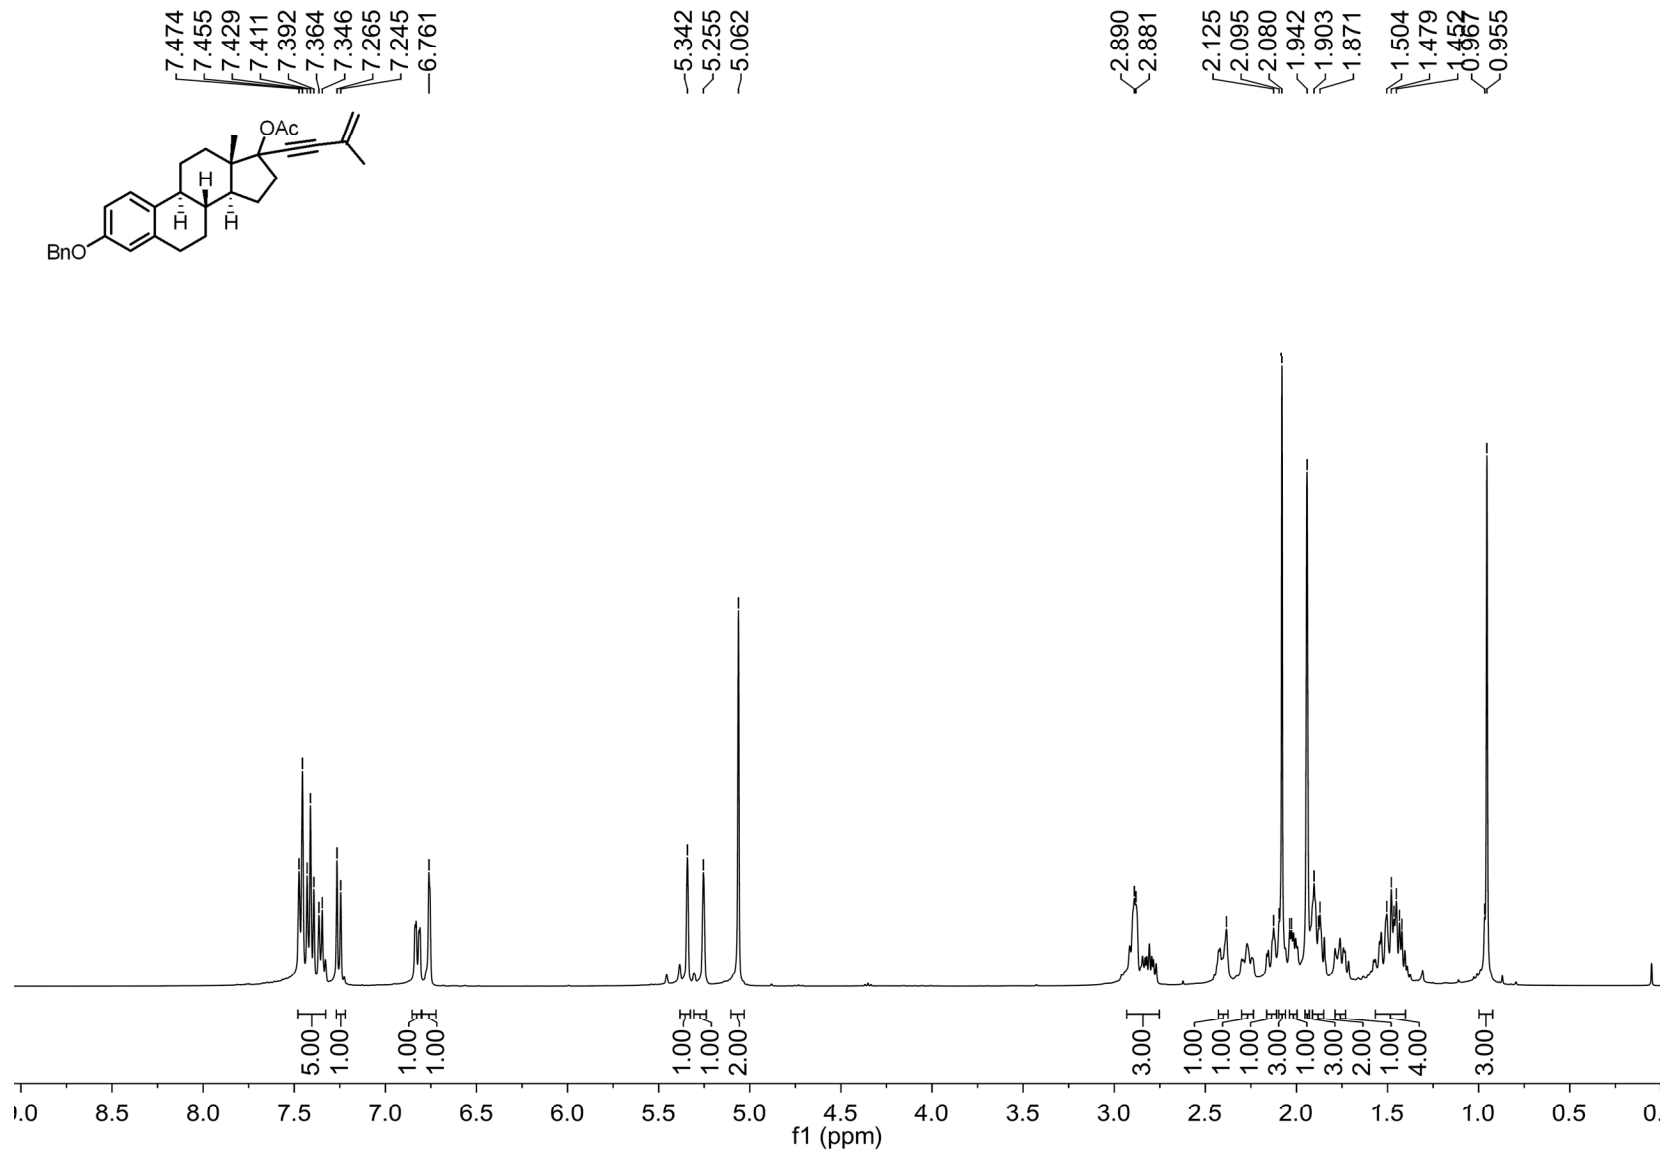

<sup>1</sup>H NMR Spectrum of Compound 1o

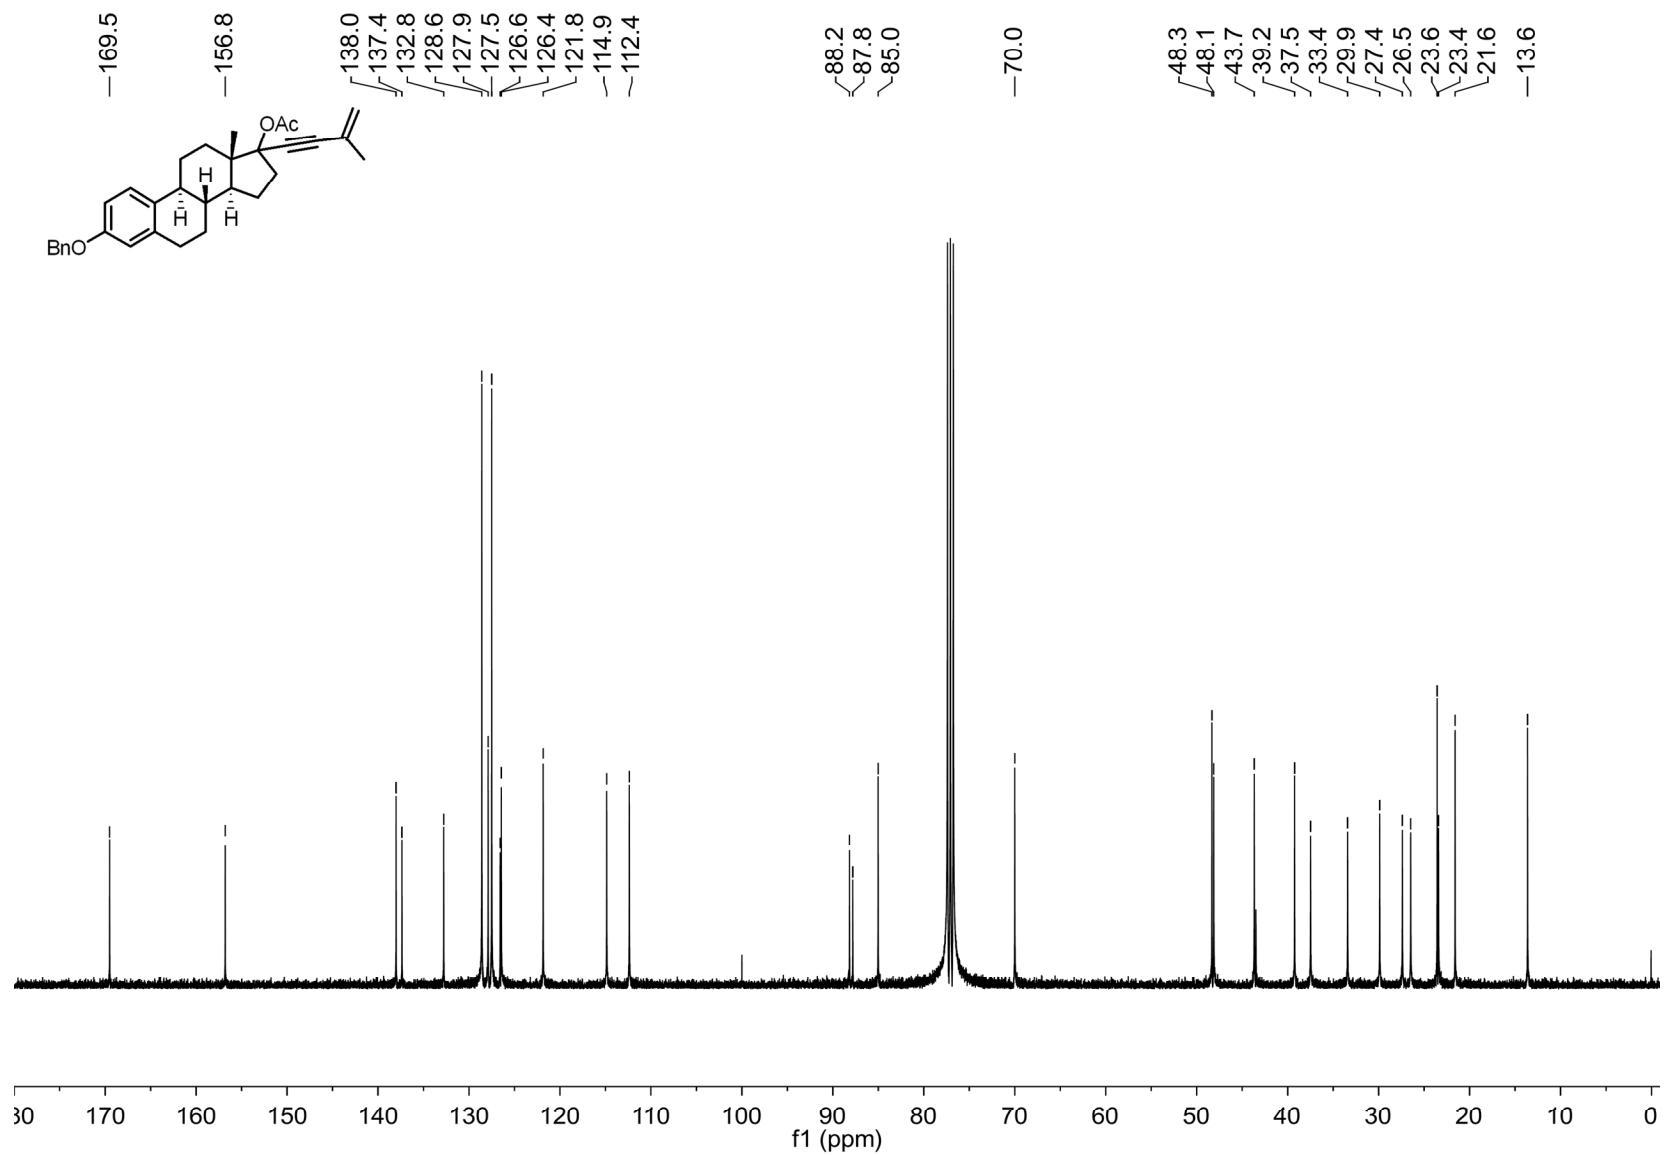

<sup>13</sup>C NMR Spectrum of Compound 10

19102020-TU4121

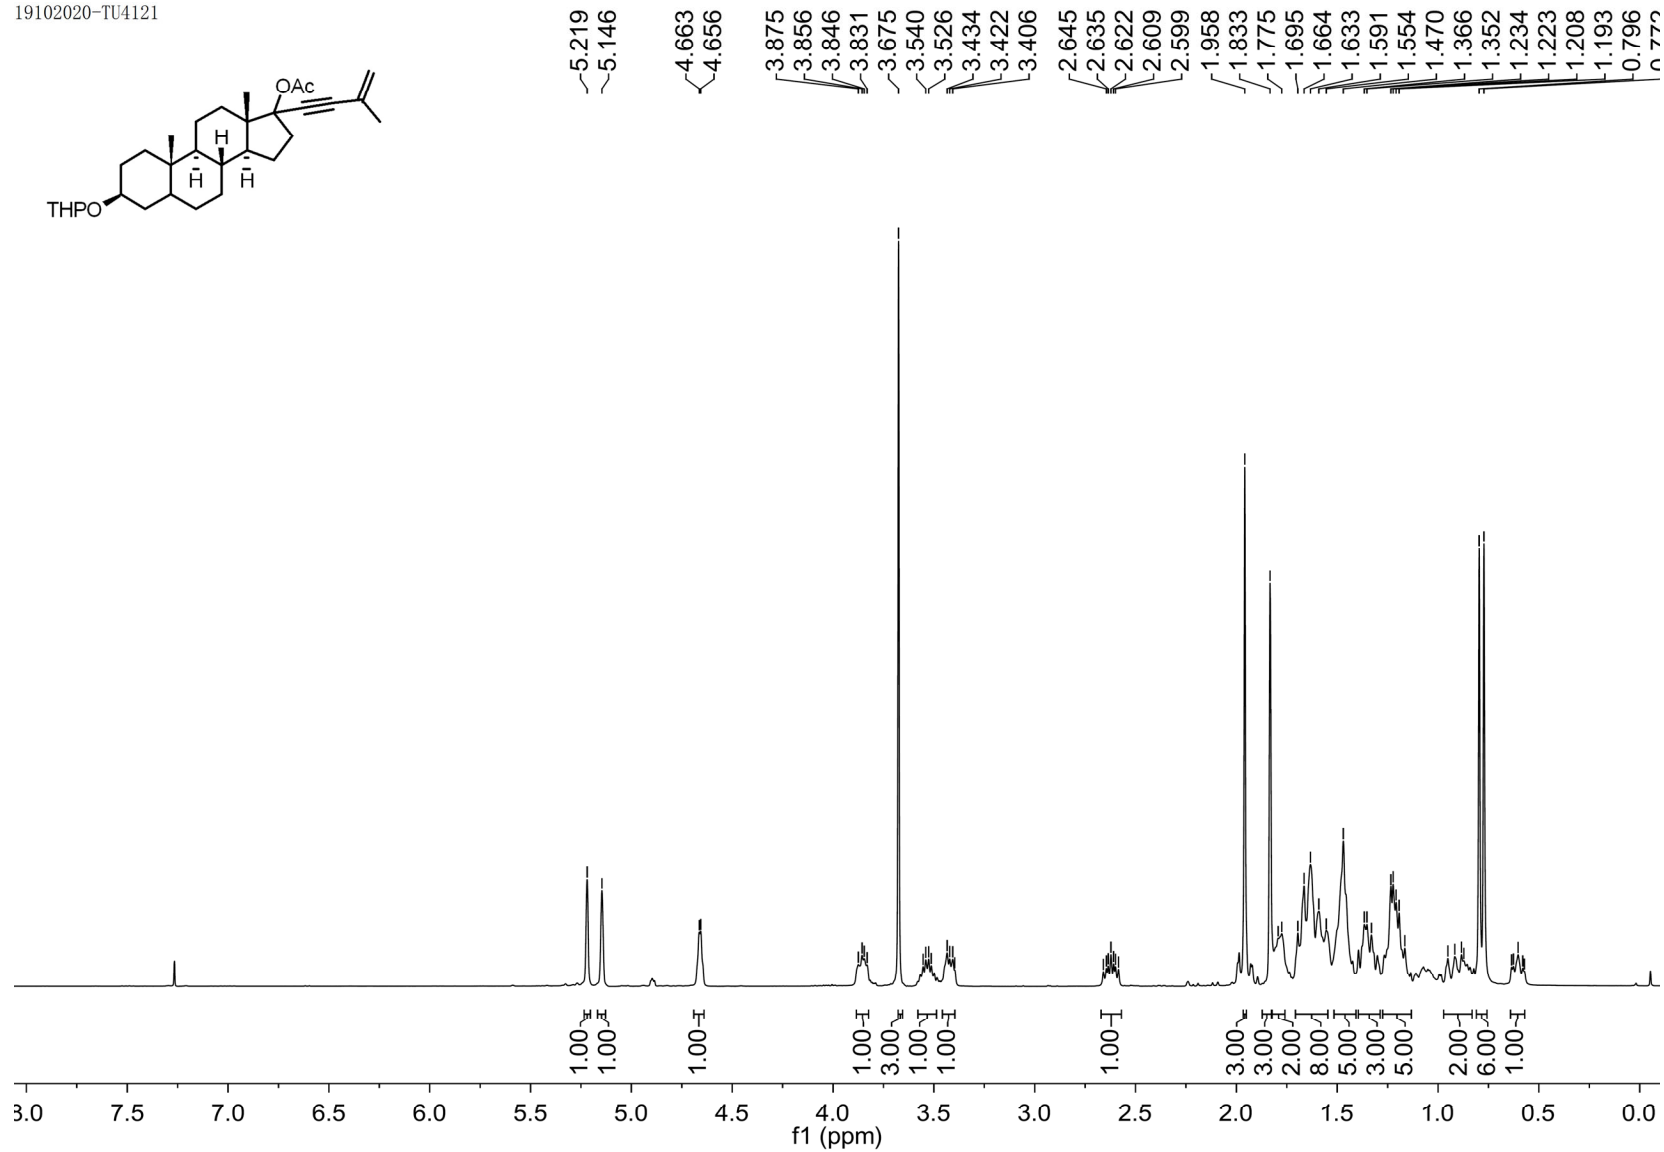

<sup>1</sup>H NMR Spectrum of Compound 1p

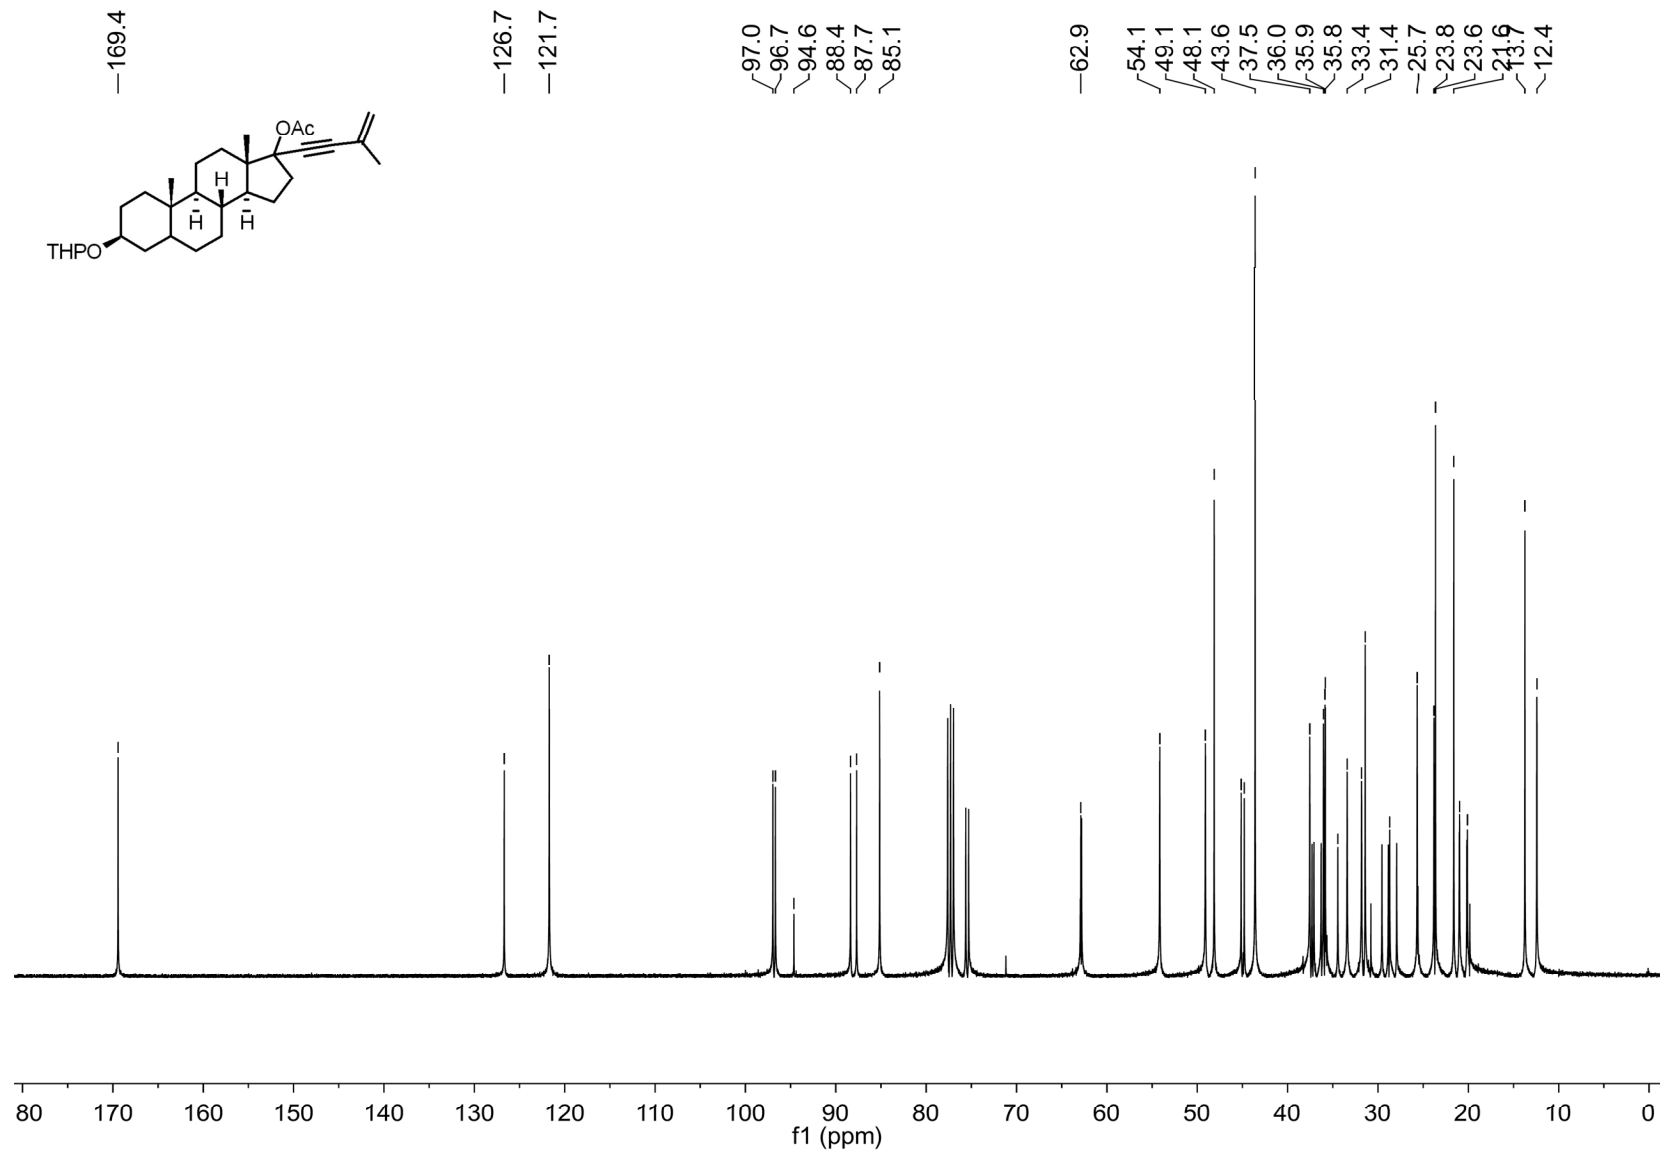

<sup>13</sup>C NMR Spectrum of Compound 1p

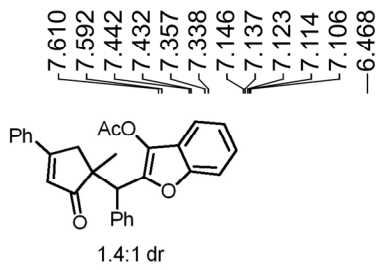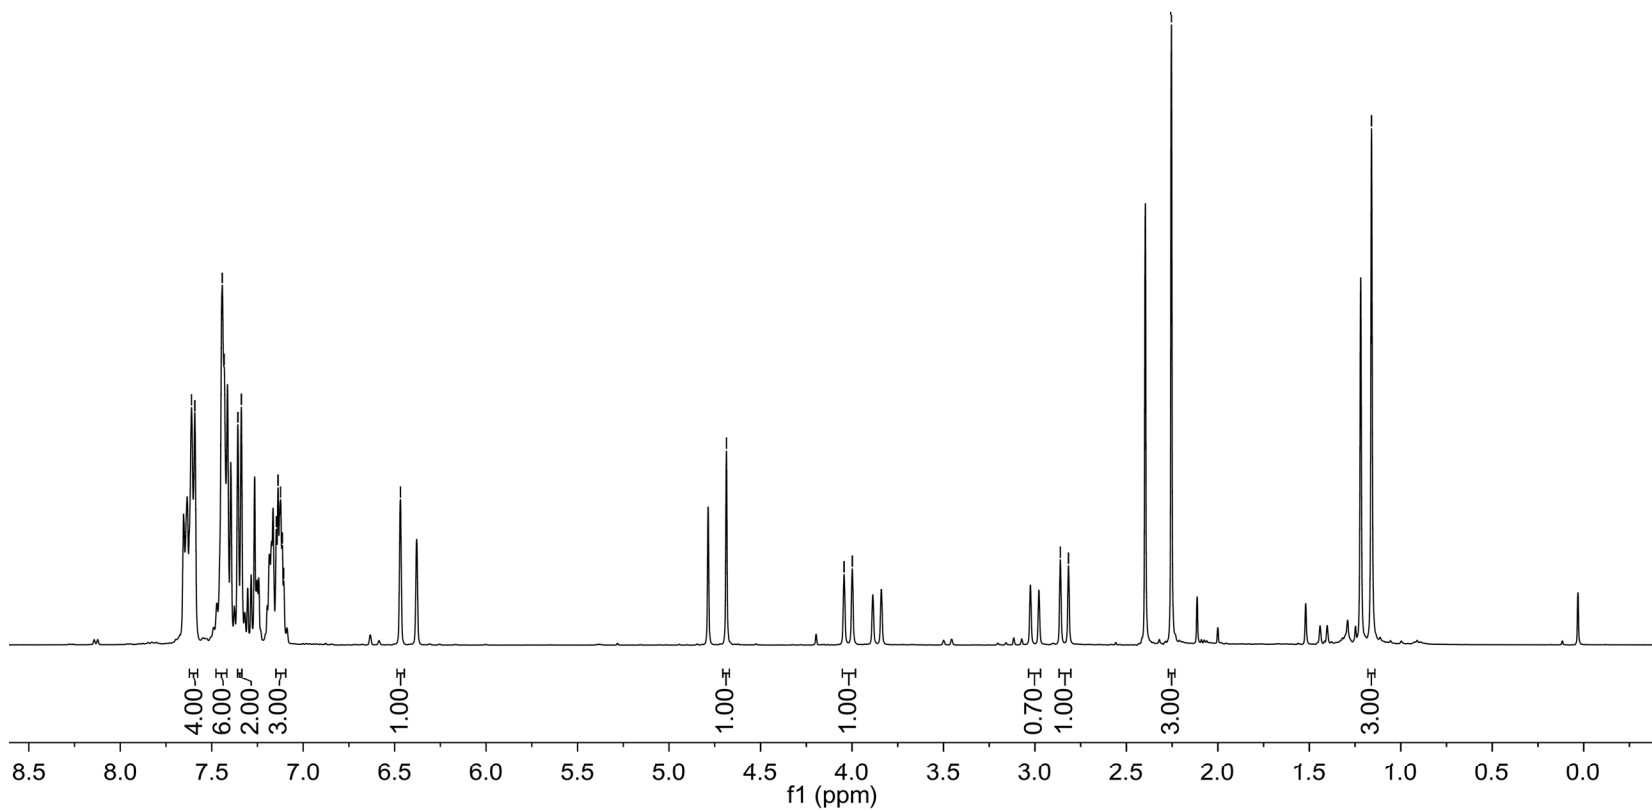

**<sup>1</sup>H NMR Spectrum of Compound 3a**

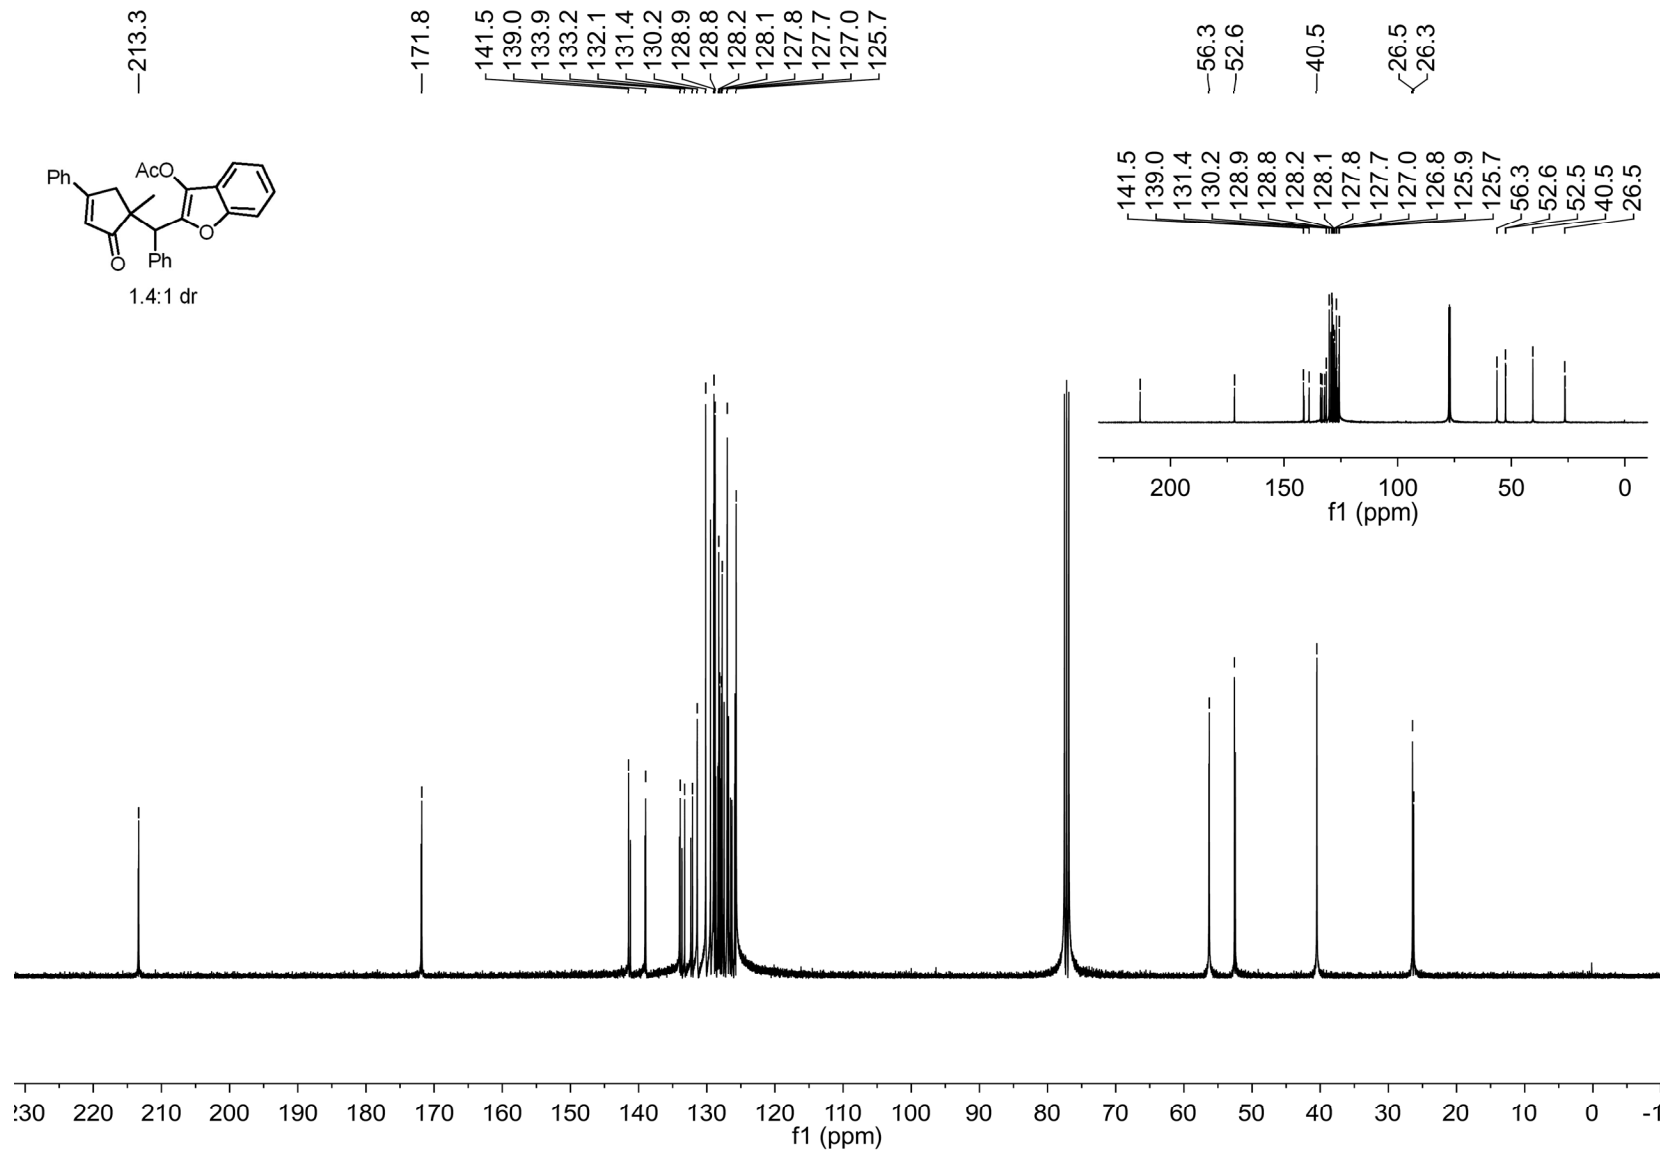

<sup>13</sup>C NMR Spectrum of Compound 3a



7.565  
7.546  
7.379  
7.360  
7.331  
7.312  
7.306  
7.289  
7.274  
7.252  
7.247  
7.227  
7.208  
7.189  
6.162

4.650

4.023  
3.977

2.781  
2.735

2.237  
2.184

1.159

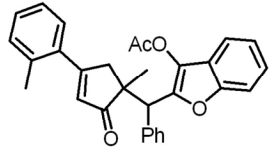

> 19:1 dr

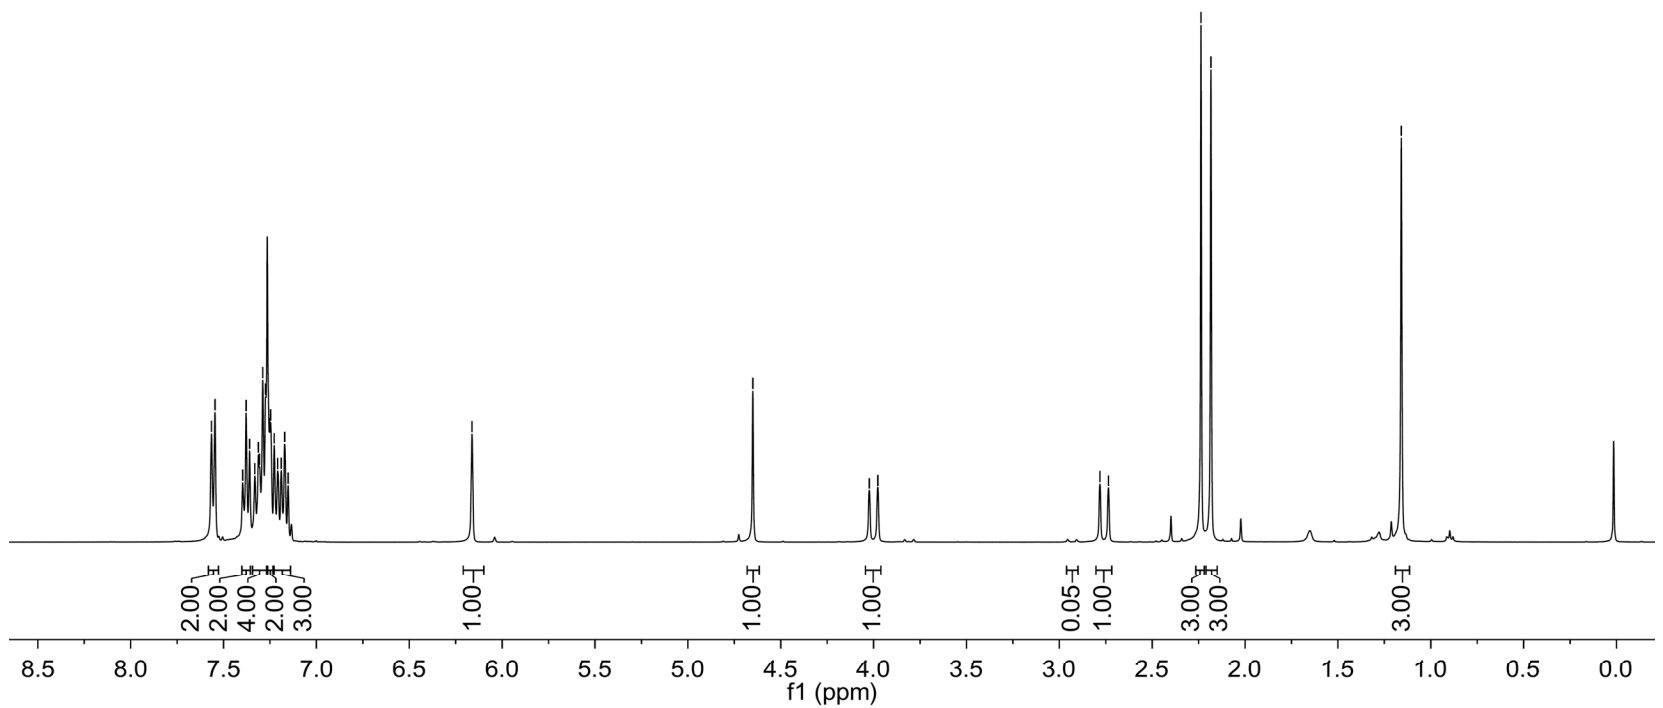

**<sup>1</sup>H NMR Spectrum of Compound 3b**

11112021-TU3557C

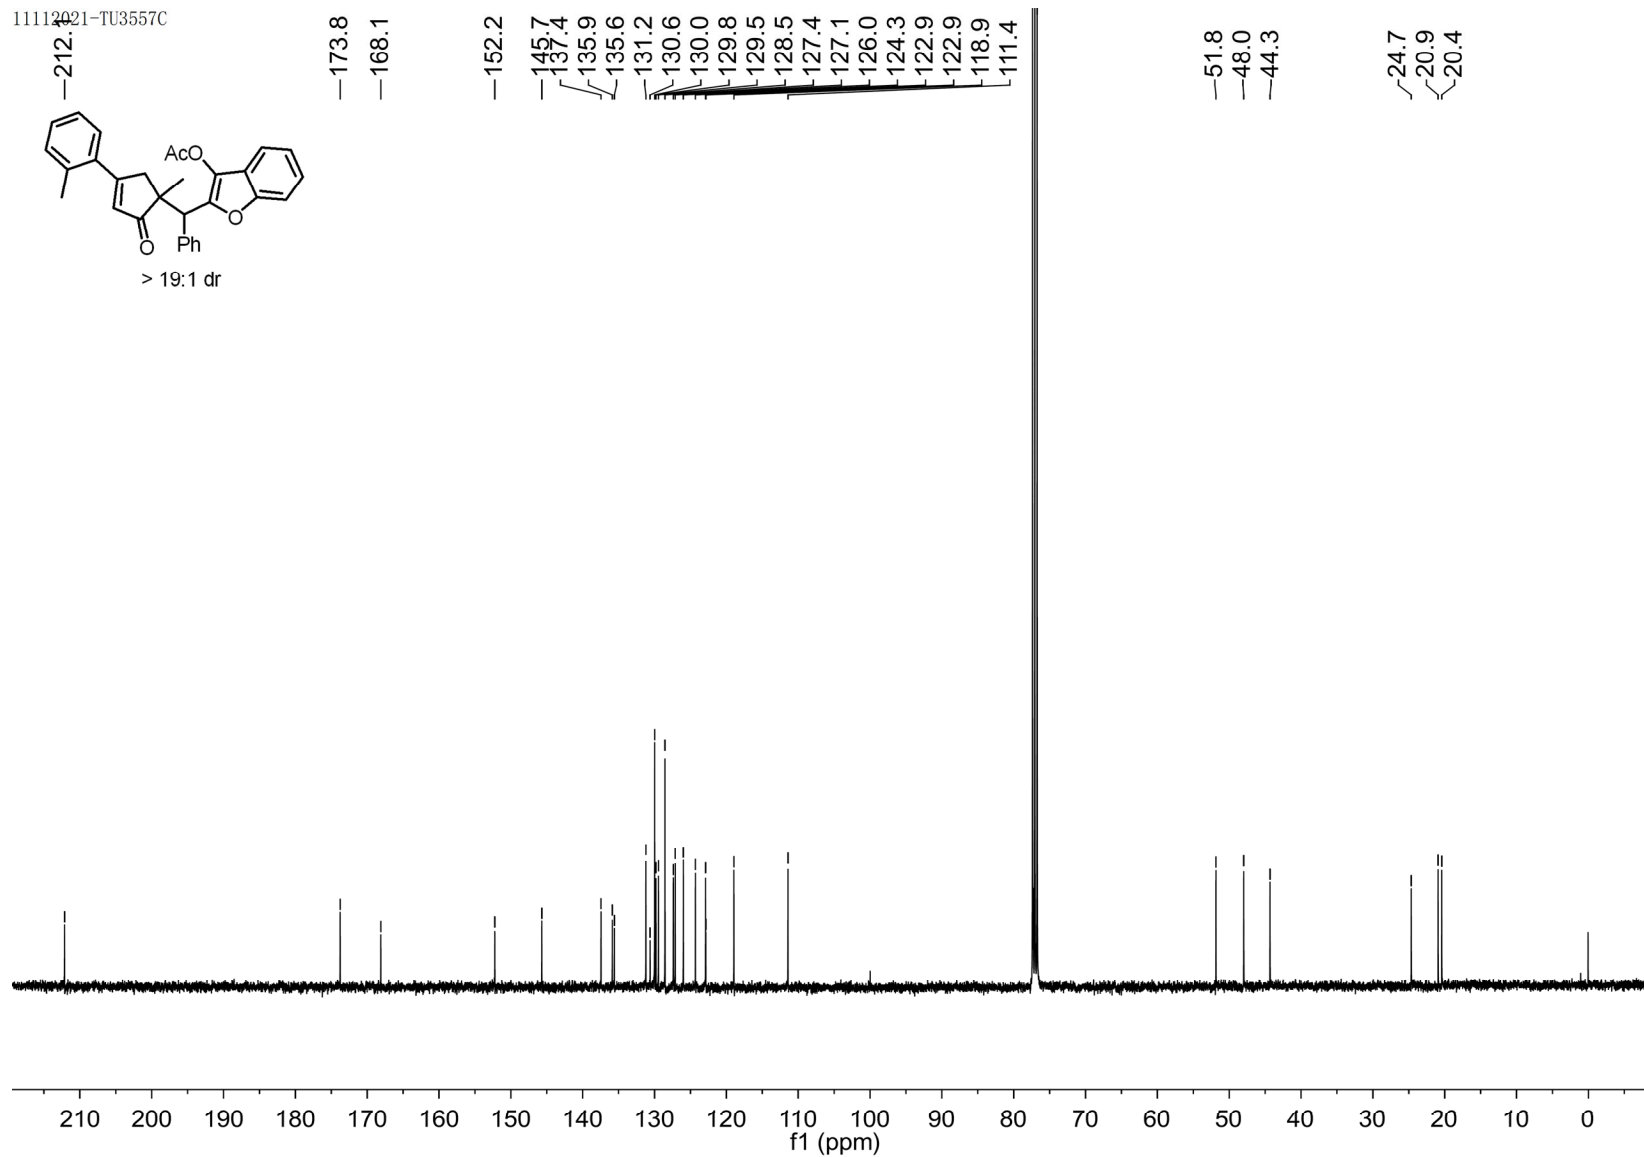

<sup>13</sup>C NMR Spectrum of Compound 3b

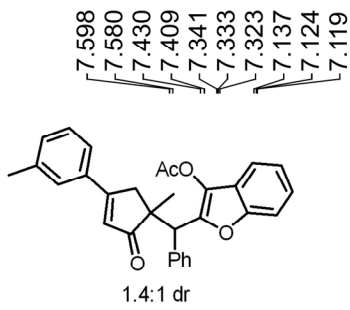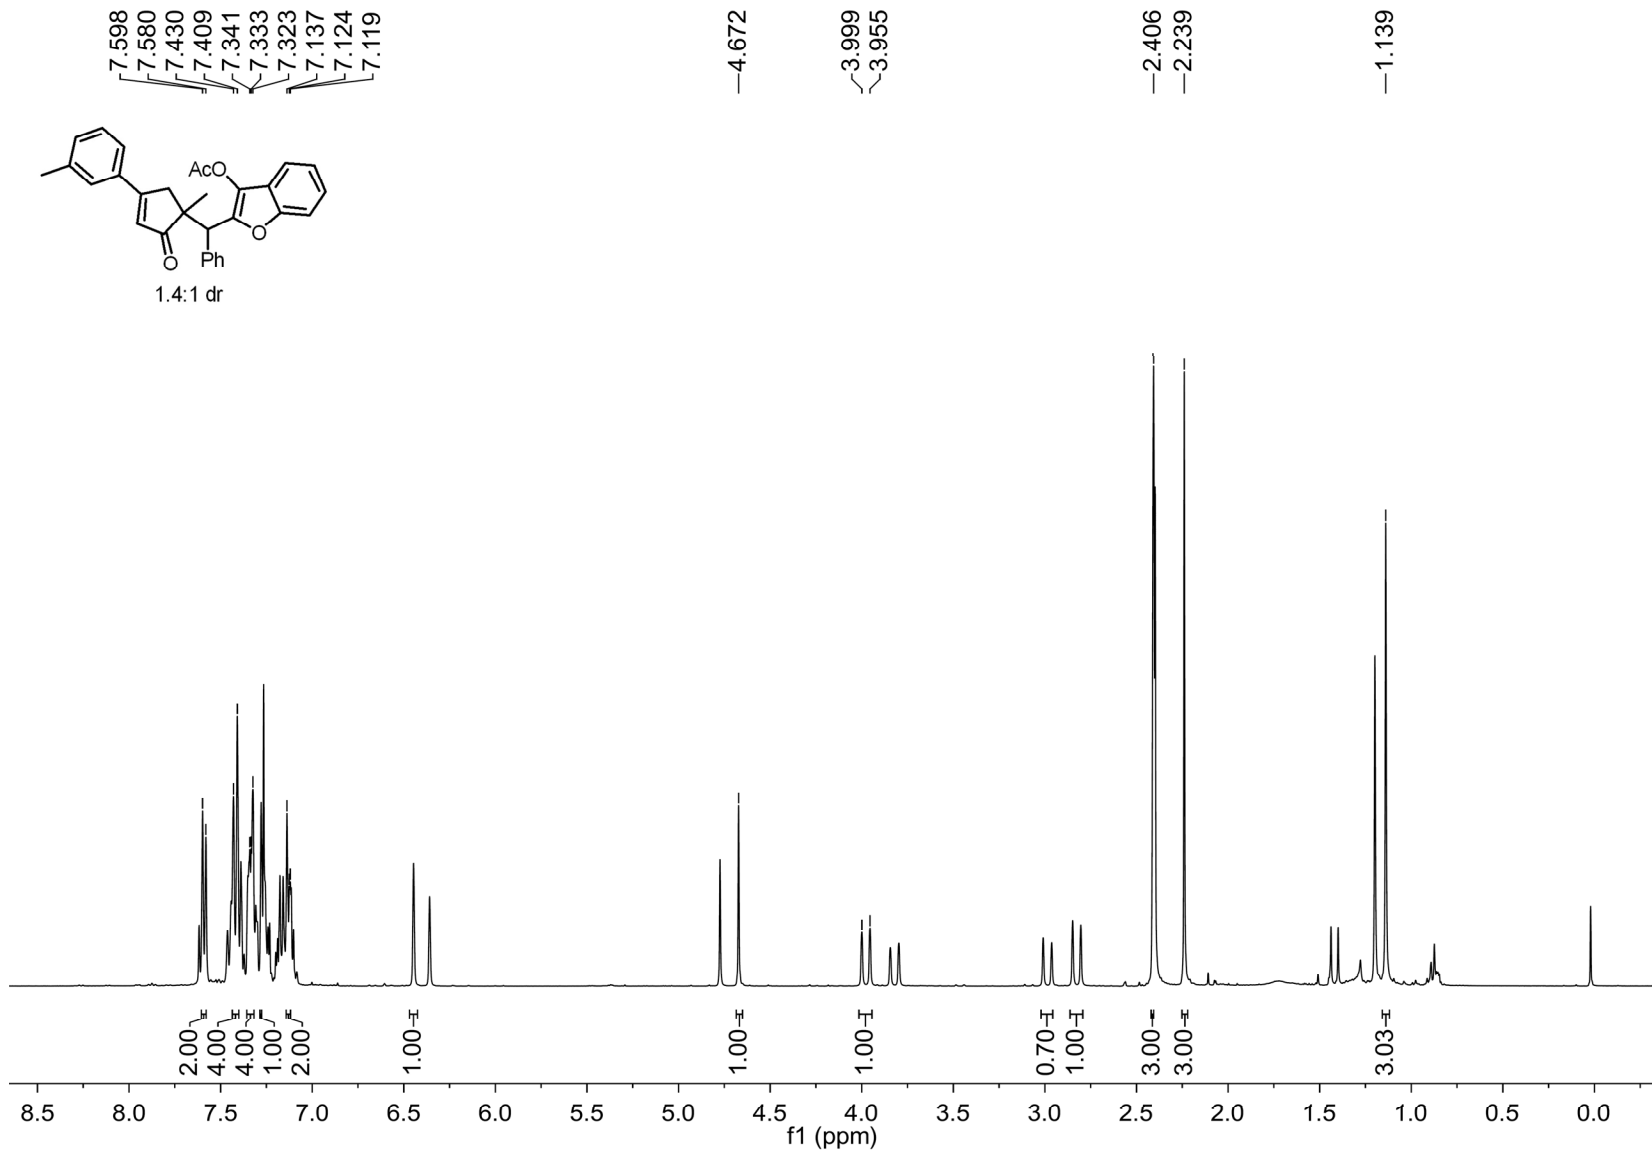

**<sup>1</sup>H NMR Spectrum of Compound 3c**

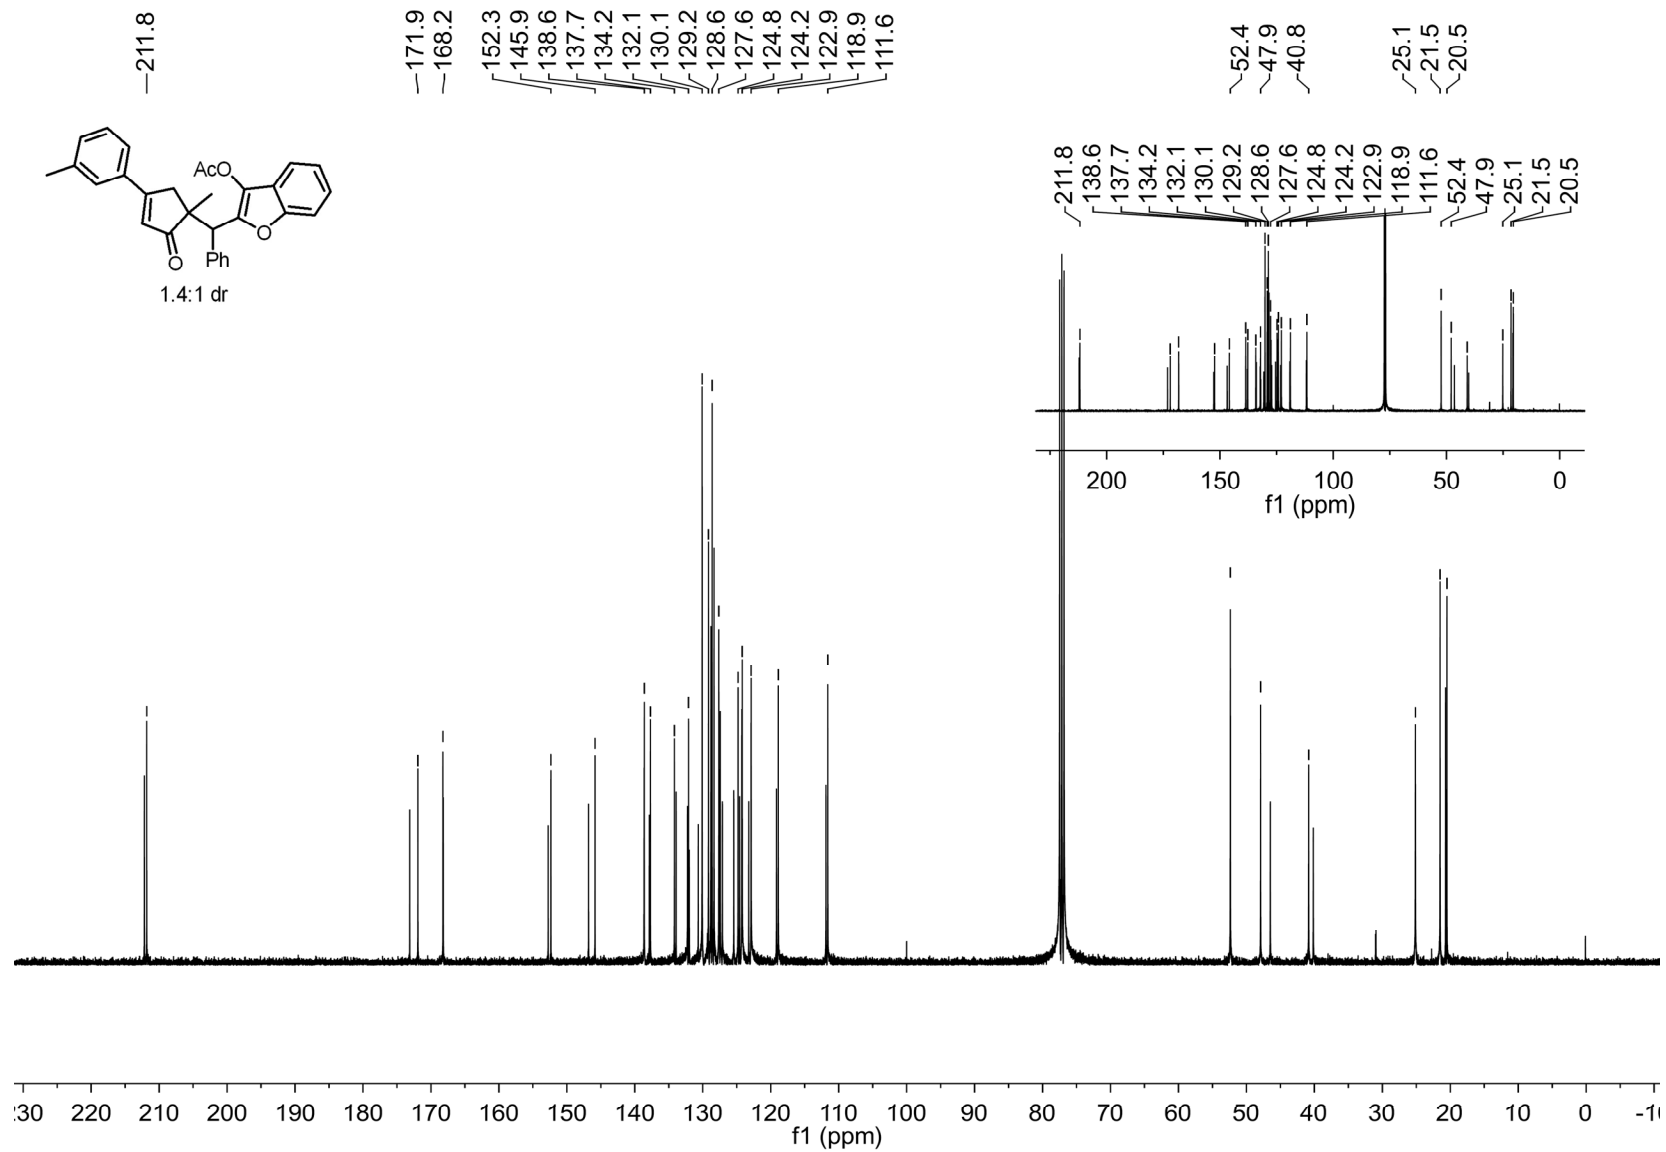

**<sup>13</sup>C NMR Spectrum of Compound 3c**

7.551  
7.531  
7.503  
7.419  
7.400  
7.381  
7.244  
7.225  
7.127  
7.106  
—6.416  
—4.669  
—4.006  
—3.961  
—2.835  
—2.790  
—2.393  
—2.243  
—1.138

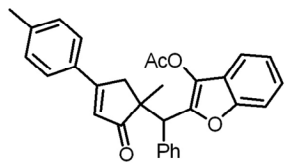

2:1 dr

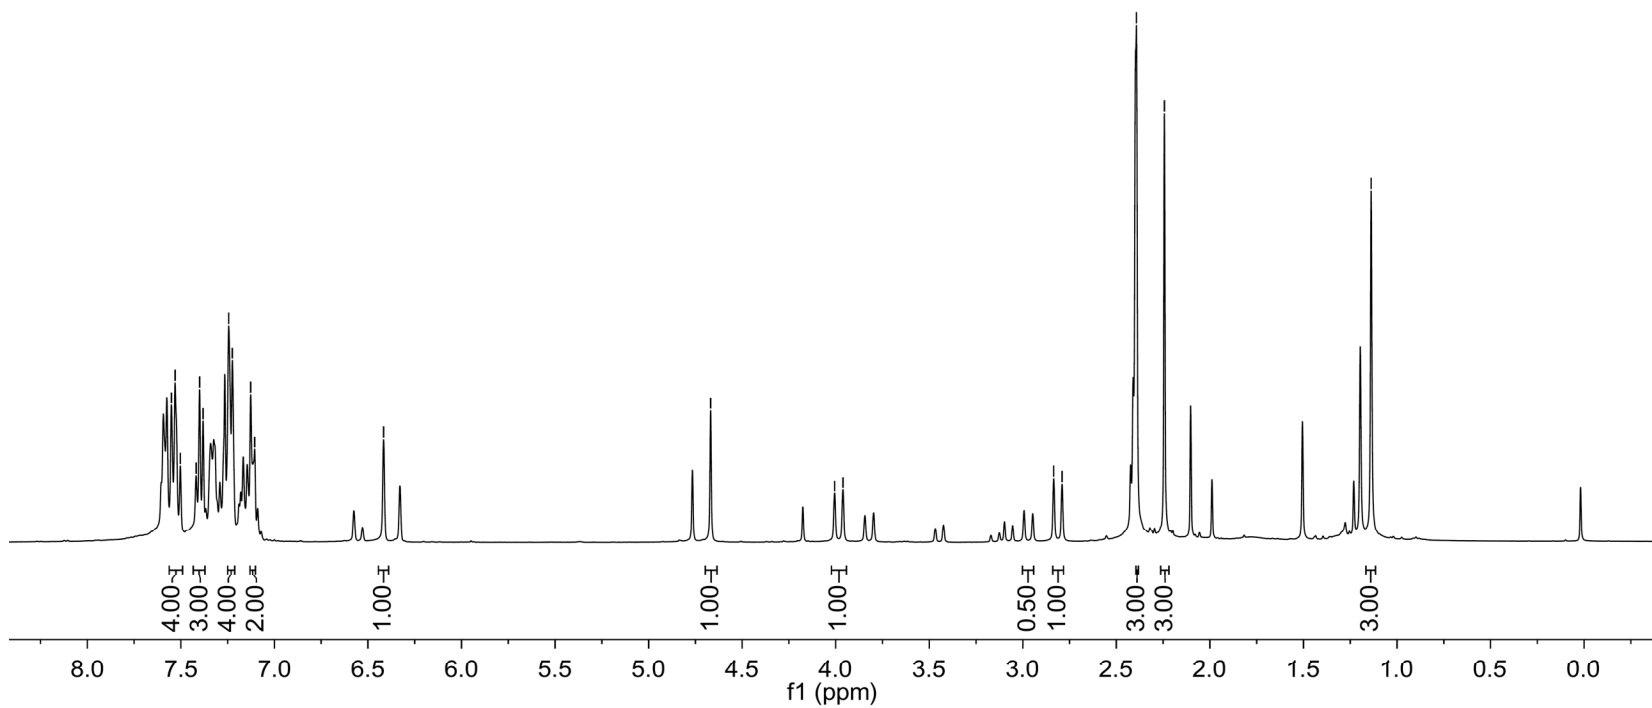

<sup>1</sup>H NMR Spectrum of Compound 3d

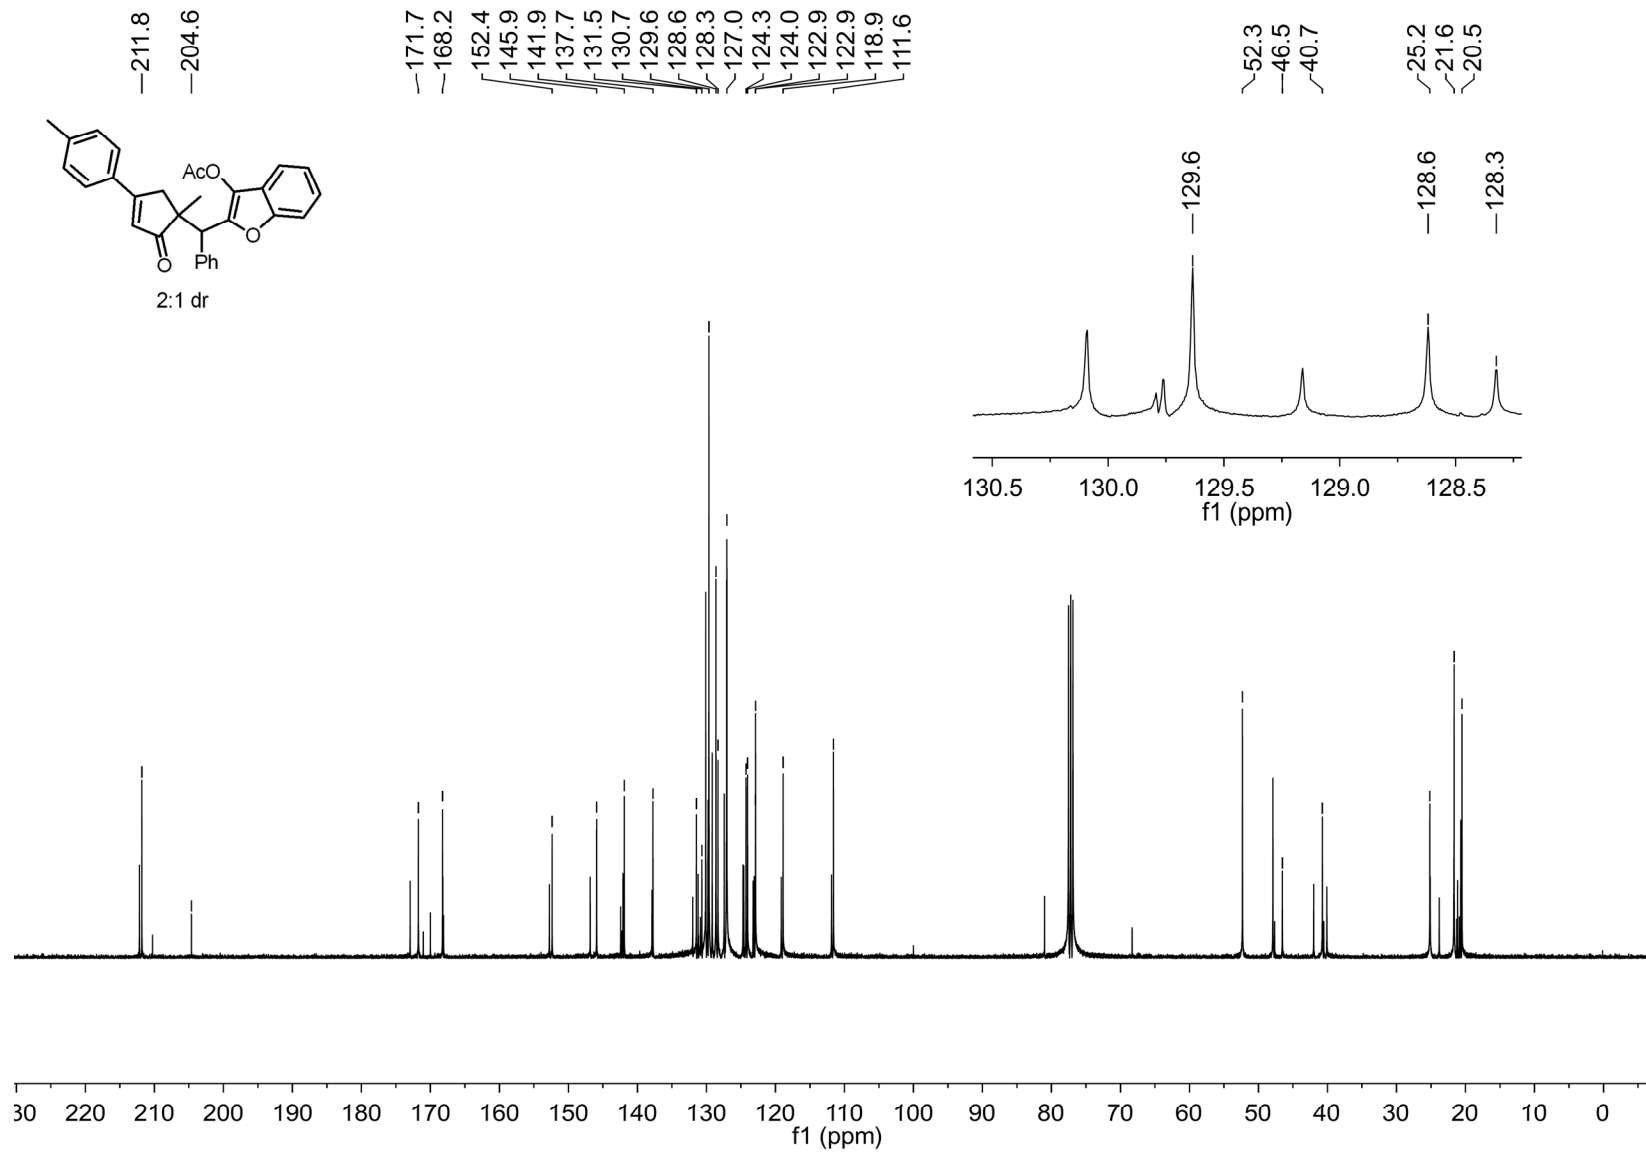

<sup>13</sup>C NMR Spectrum of Compound 3d

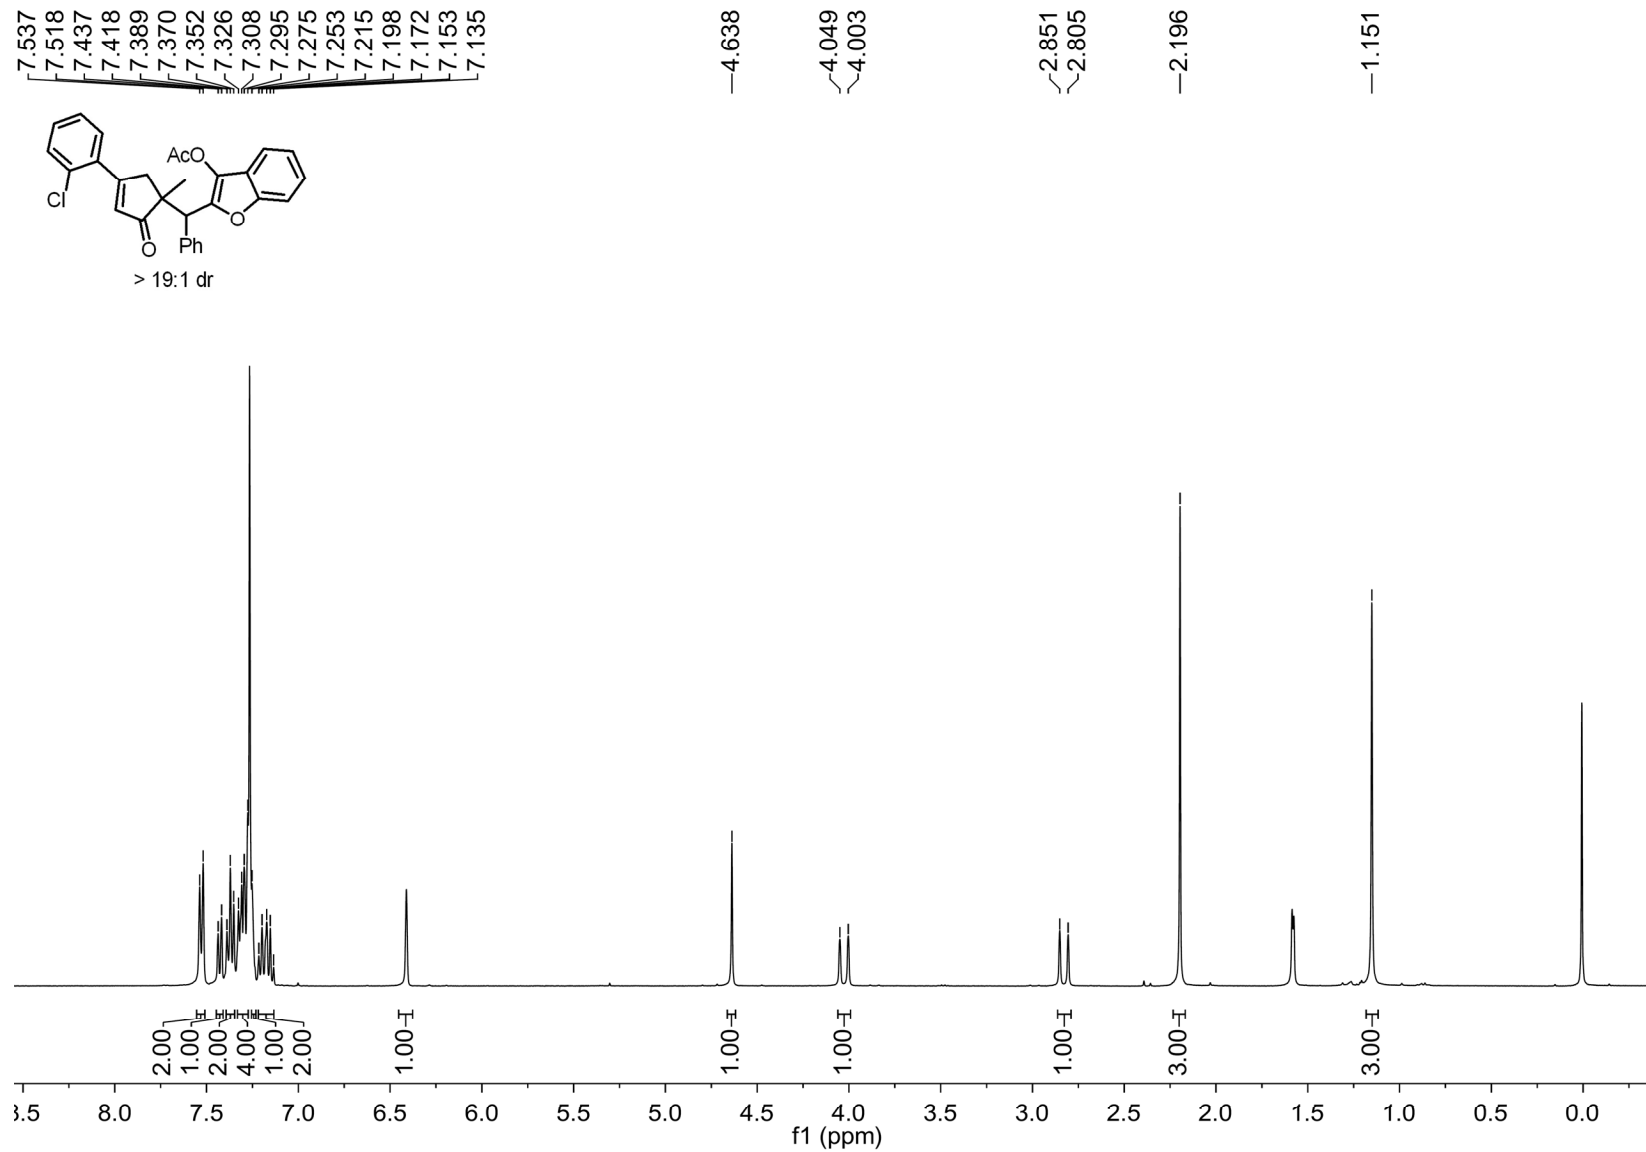

**<sup>1</sup>H NMR Spectrum of Compound 3e**

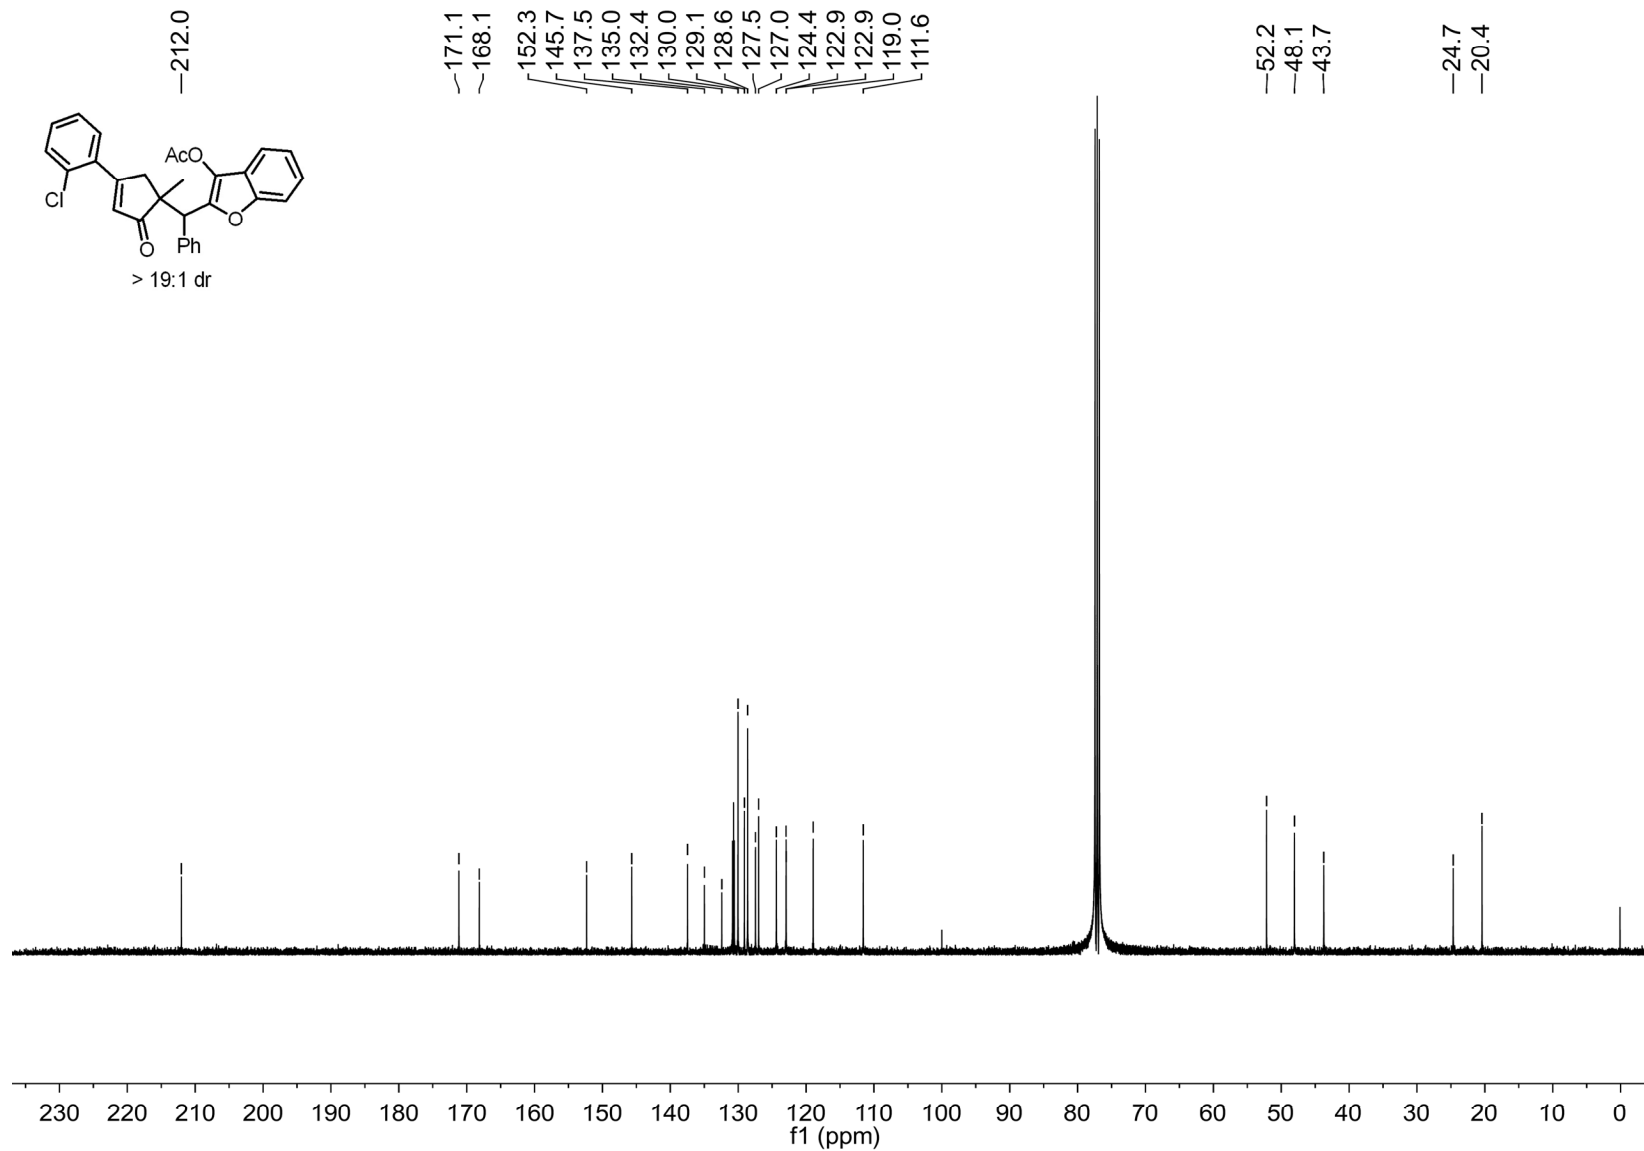

<sup>13</sup>C NMR Spectrum of Compound 3e



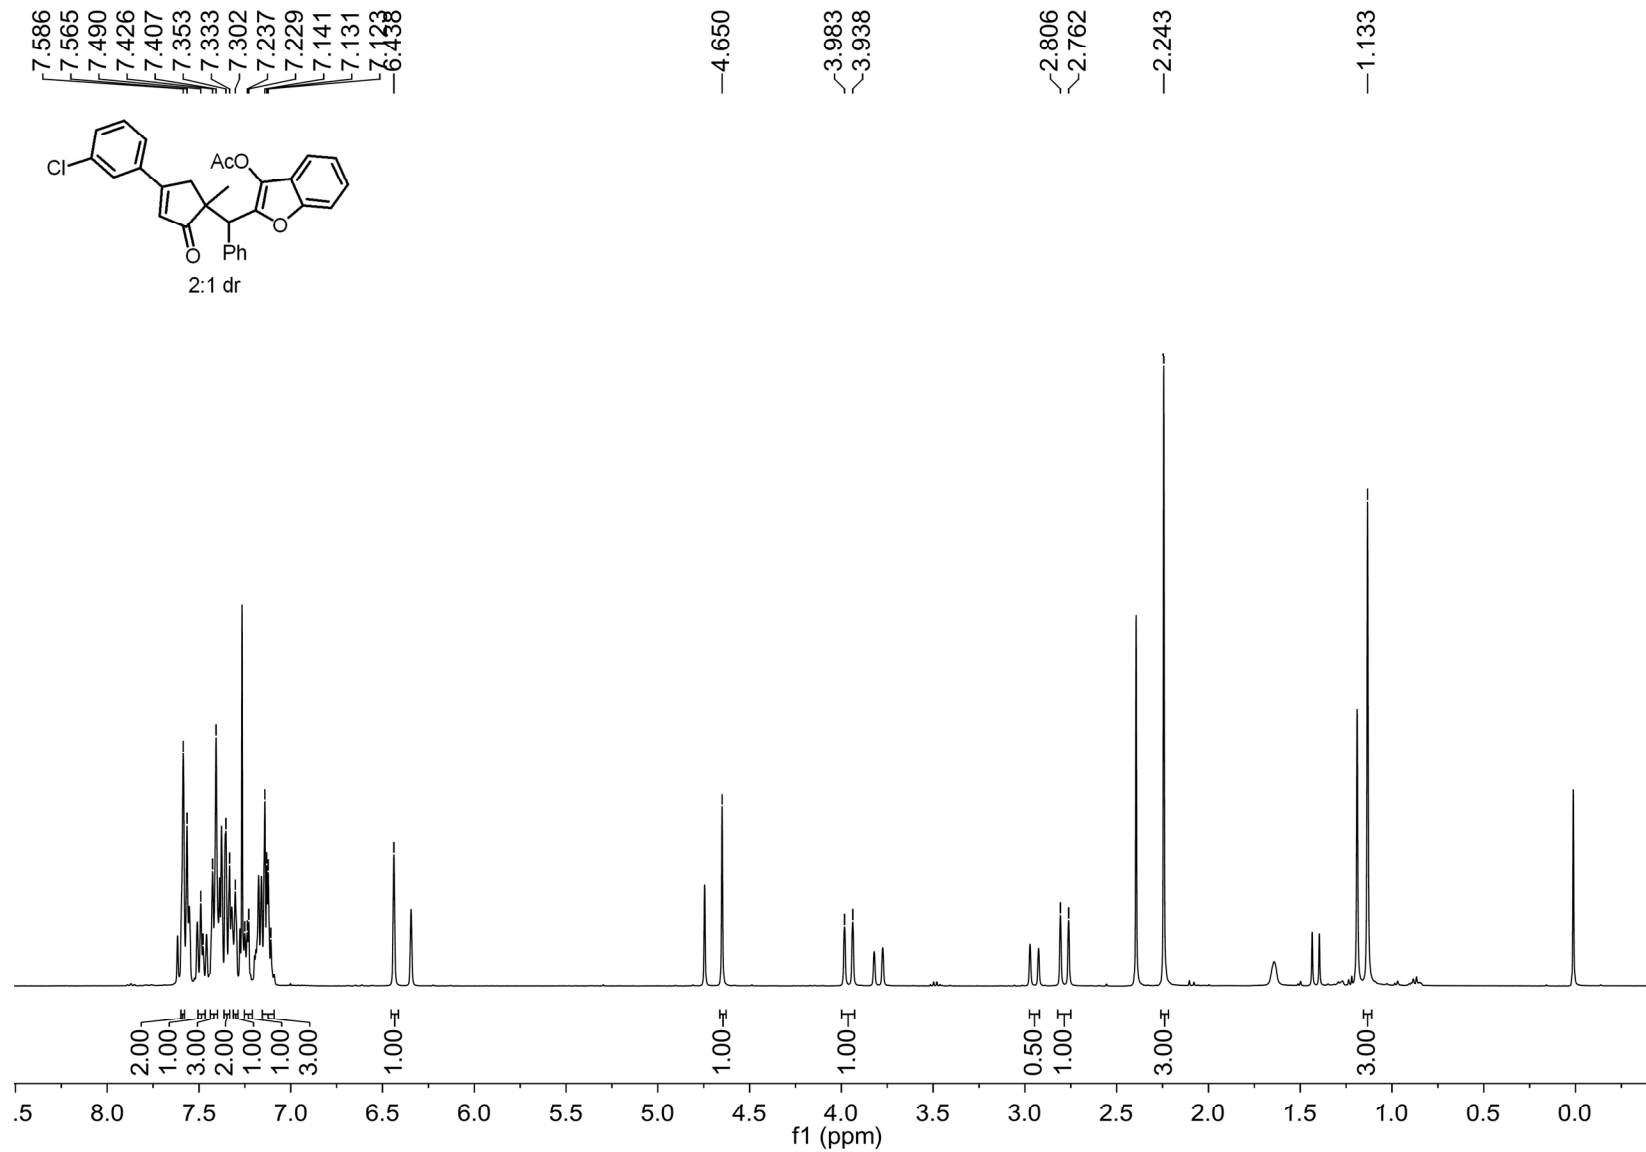

**<sup>1</sup>H NMR Spectrum of Compound 3f**

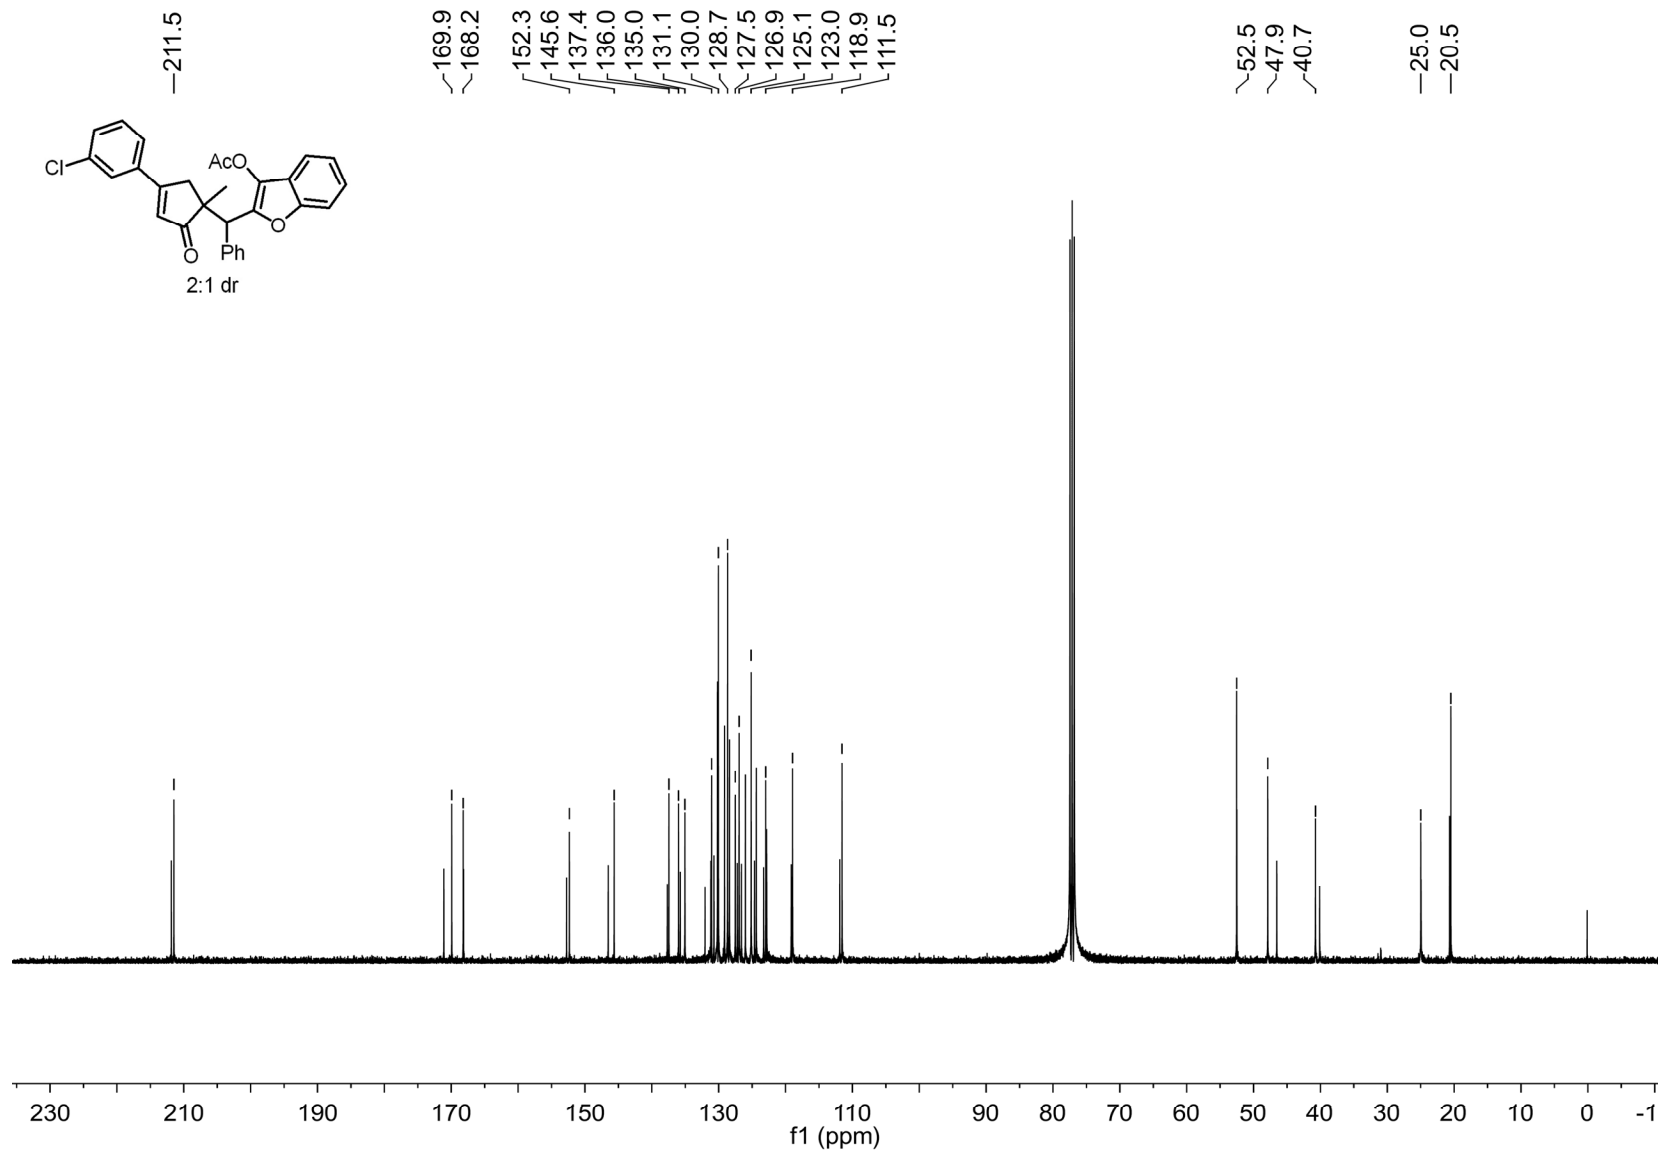

<sup>13</sup>C NMR Spectrum of Compound 3f

7.619  
7.608  
7.597  
7.461  
7.454  
7.442  
7.361  
7.342  
7.215  
7.198  
7.183  
-6.463

-4.693

4.039  
3.994

2.848  
2.804

-2.293

-1.183

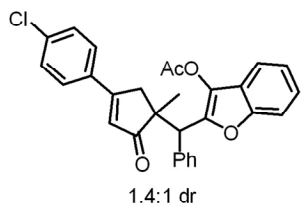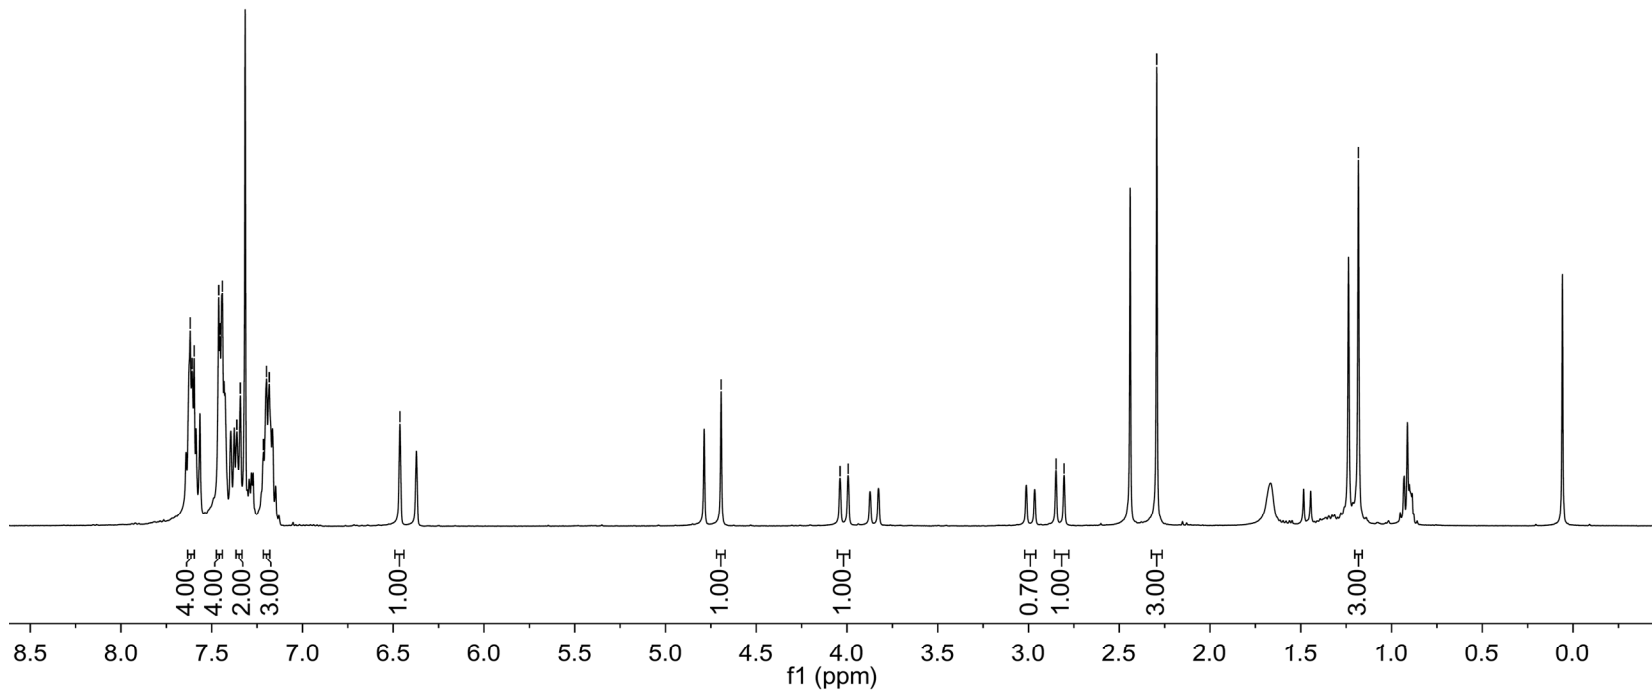

**<sup>1</sup>H NMR Spectrum of Compound 3g**

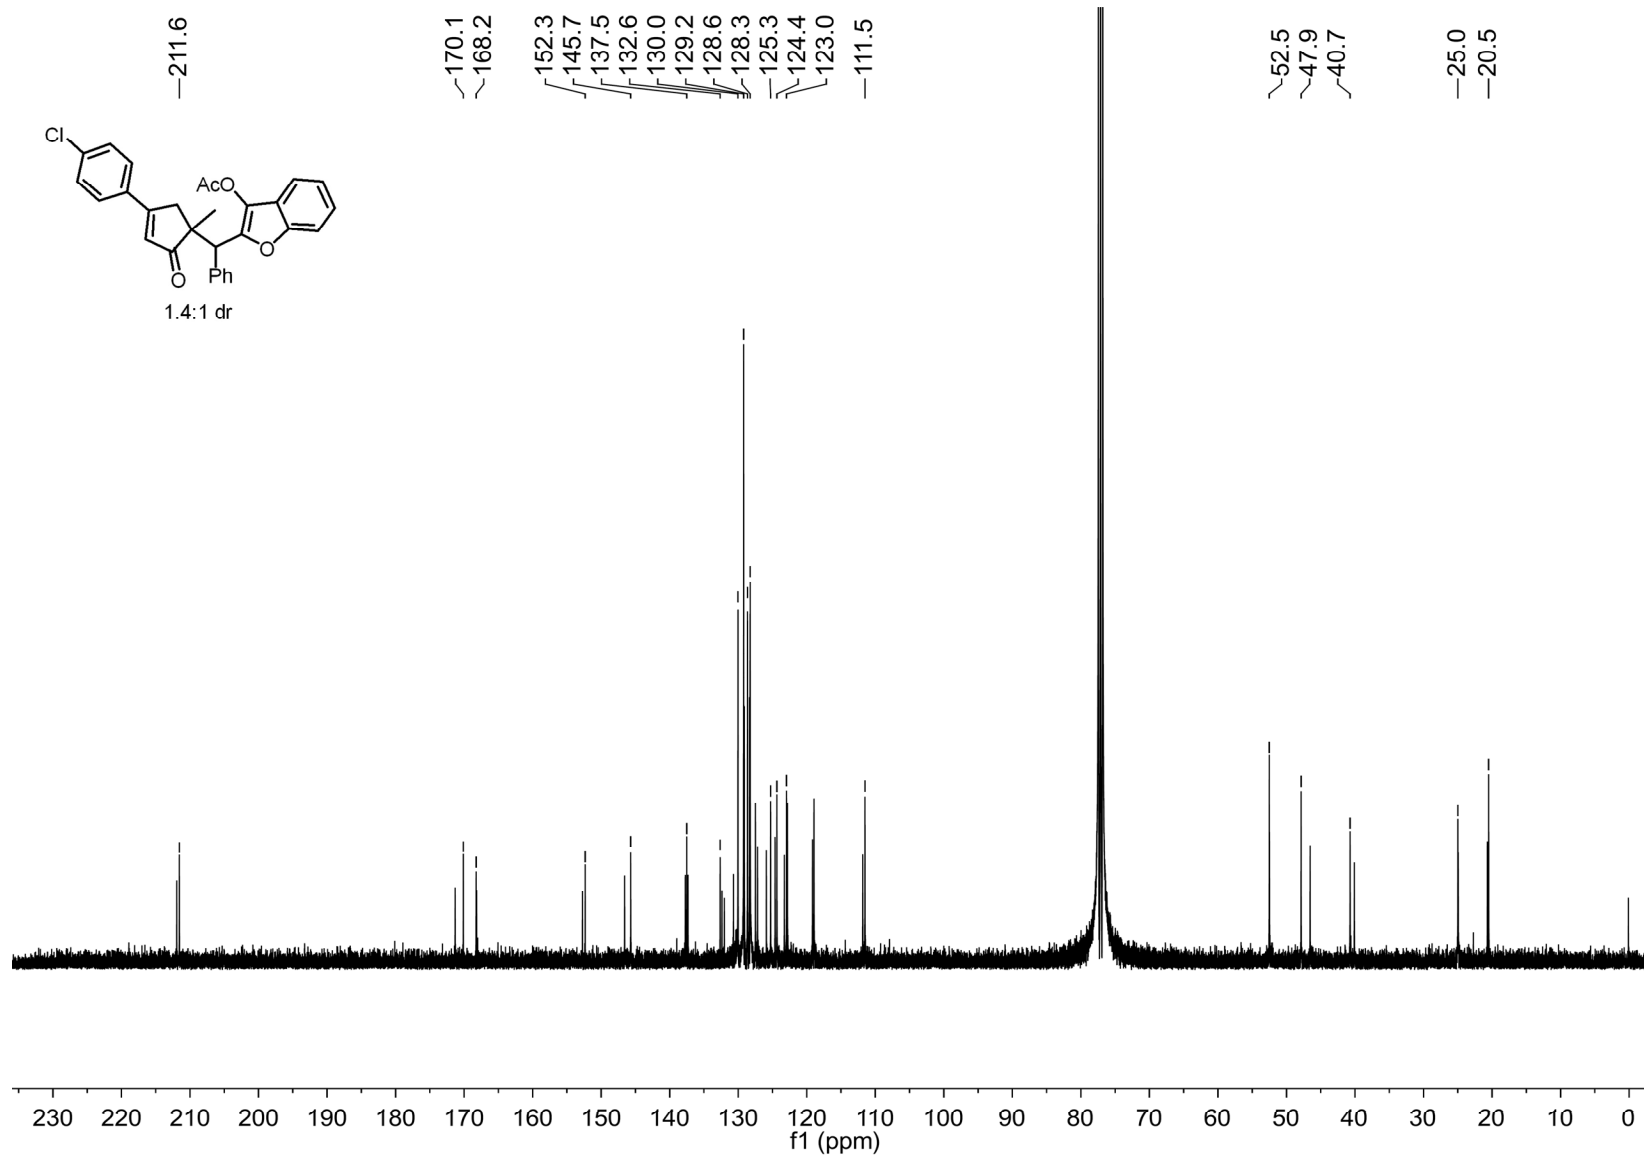

<sup>13</sup>C NMR Spectrum of Compound 3g

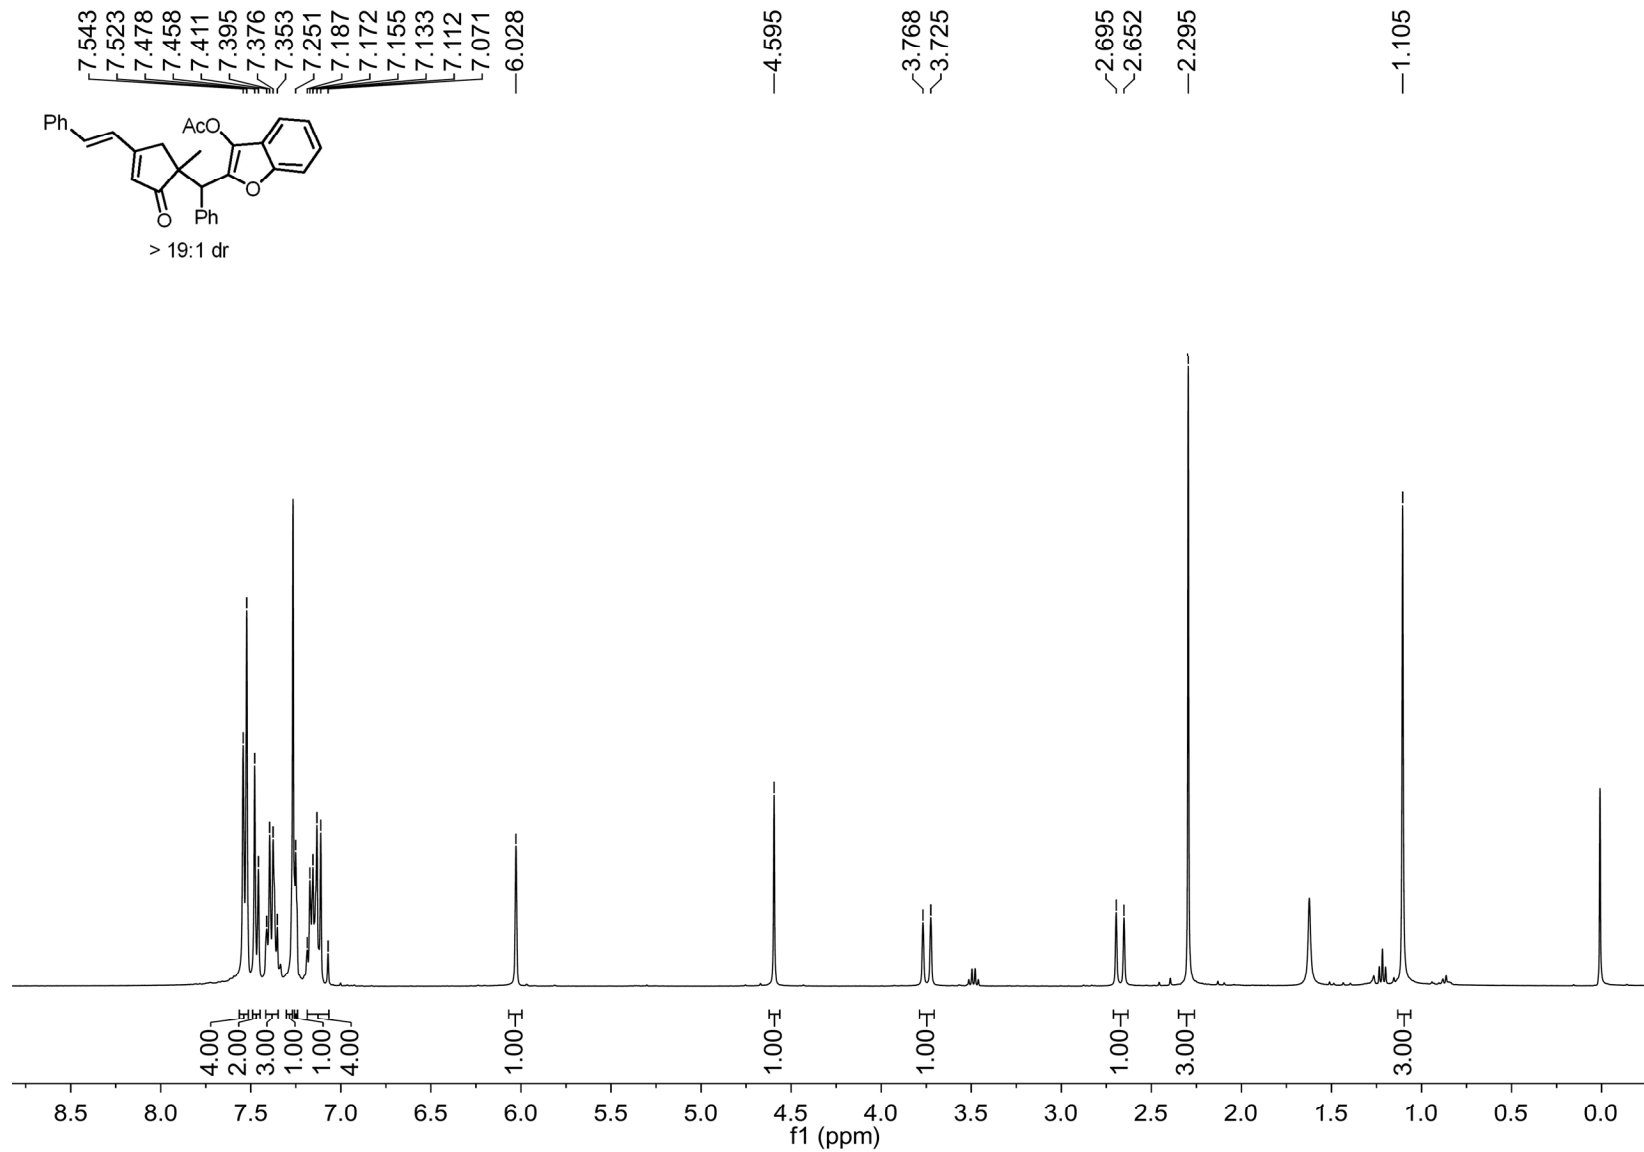

**<sup>1</sup>H NMR Spectrum of Compound 3h**

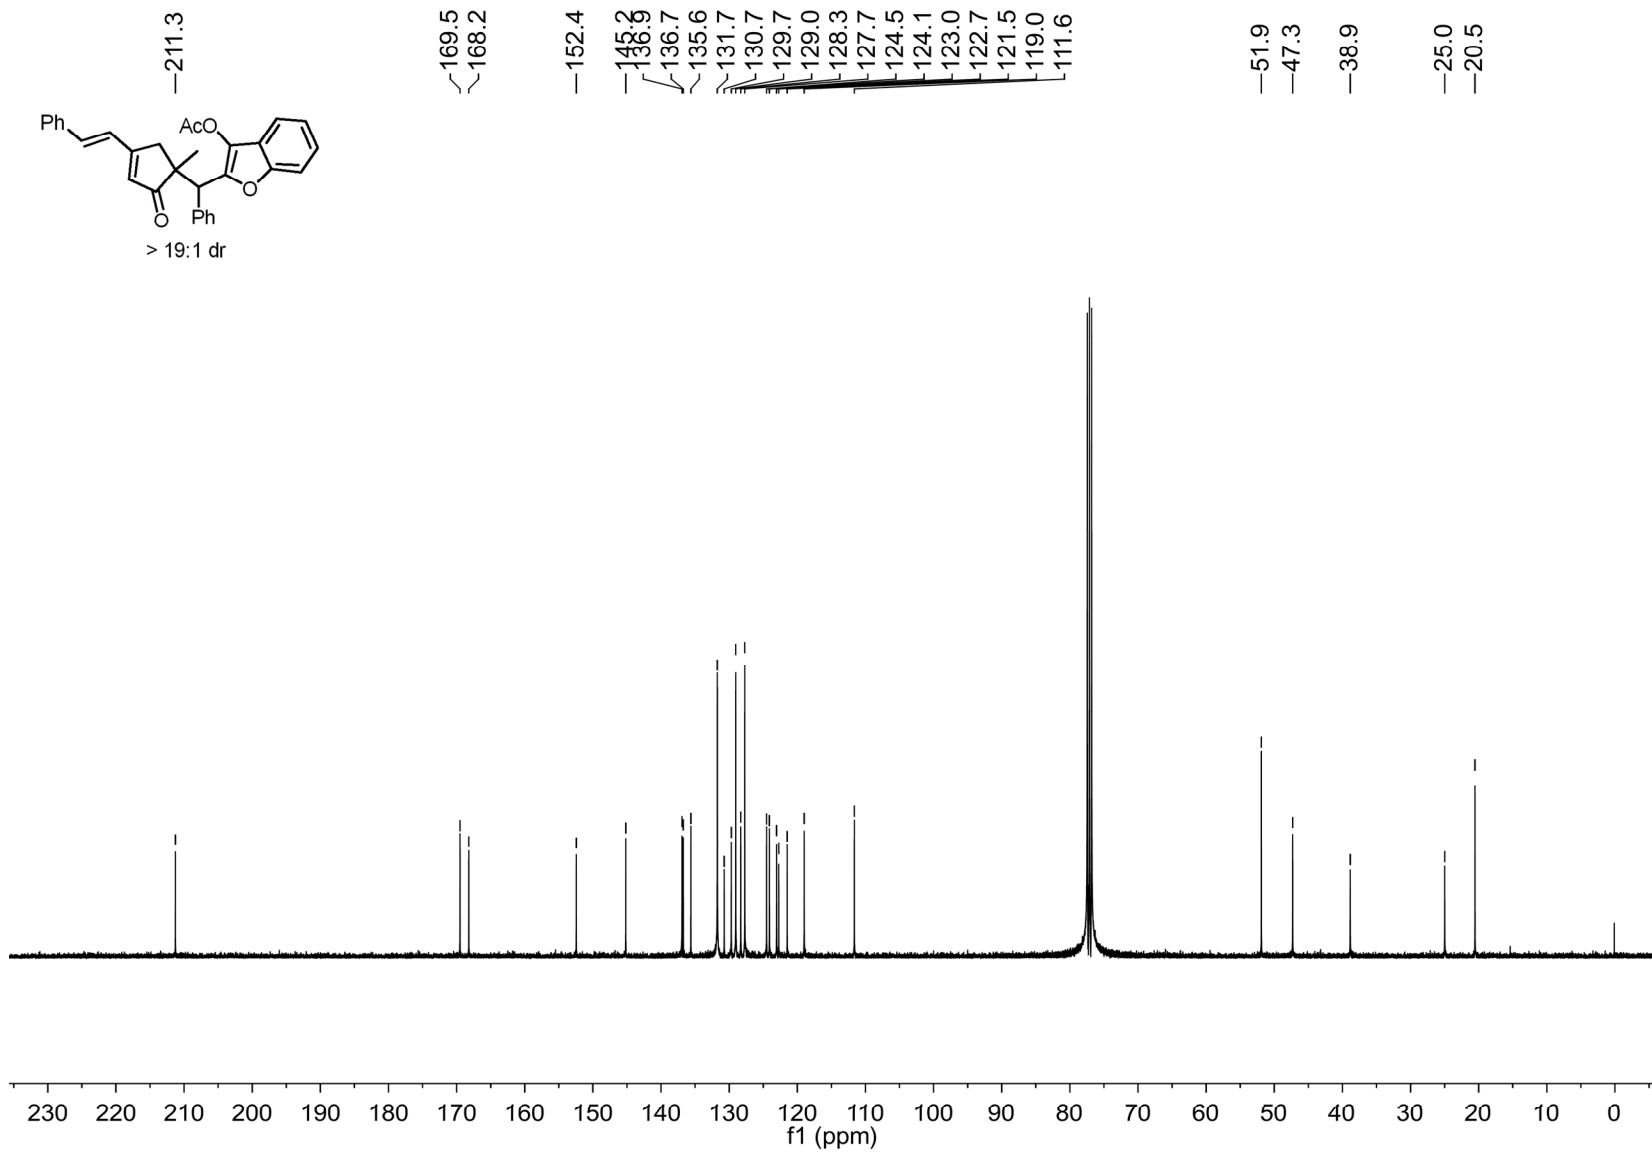

$^{13}\text{C}$  NMR Spectrum of Compound 3h

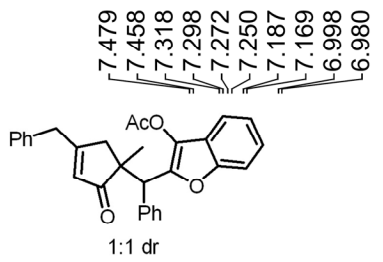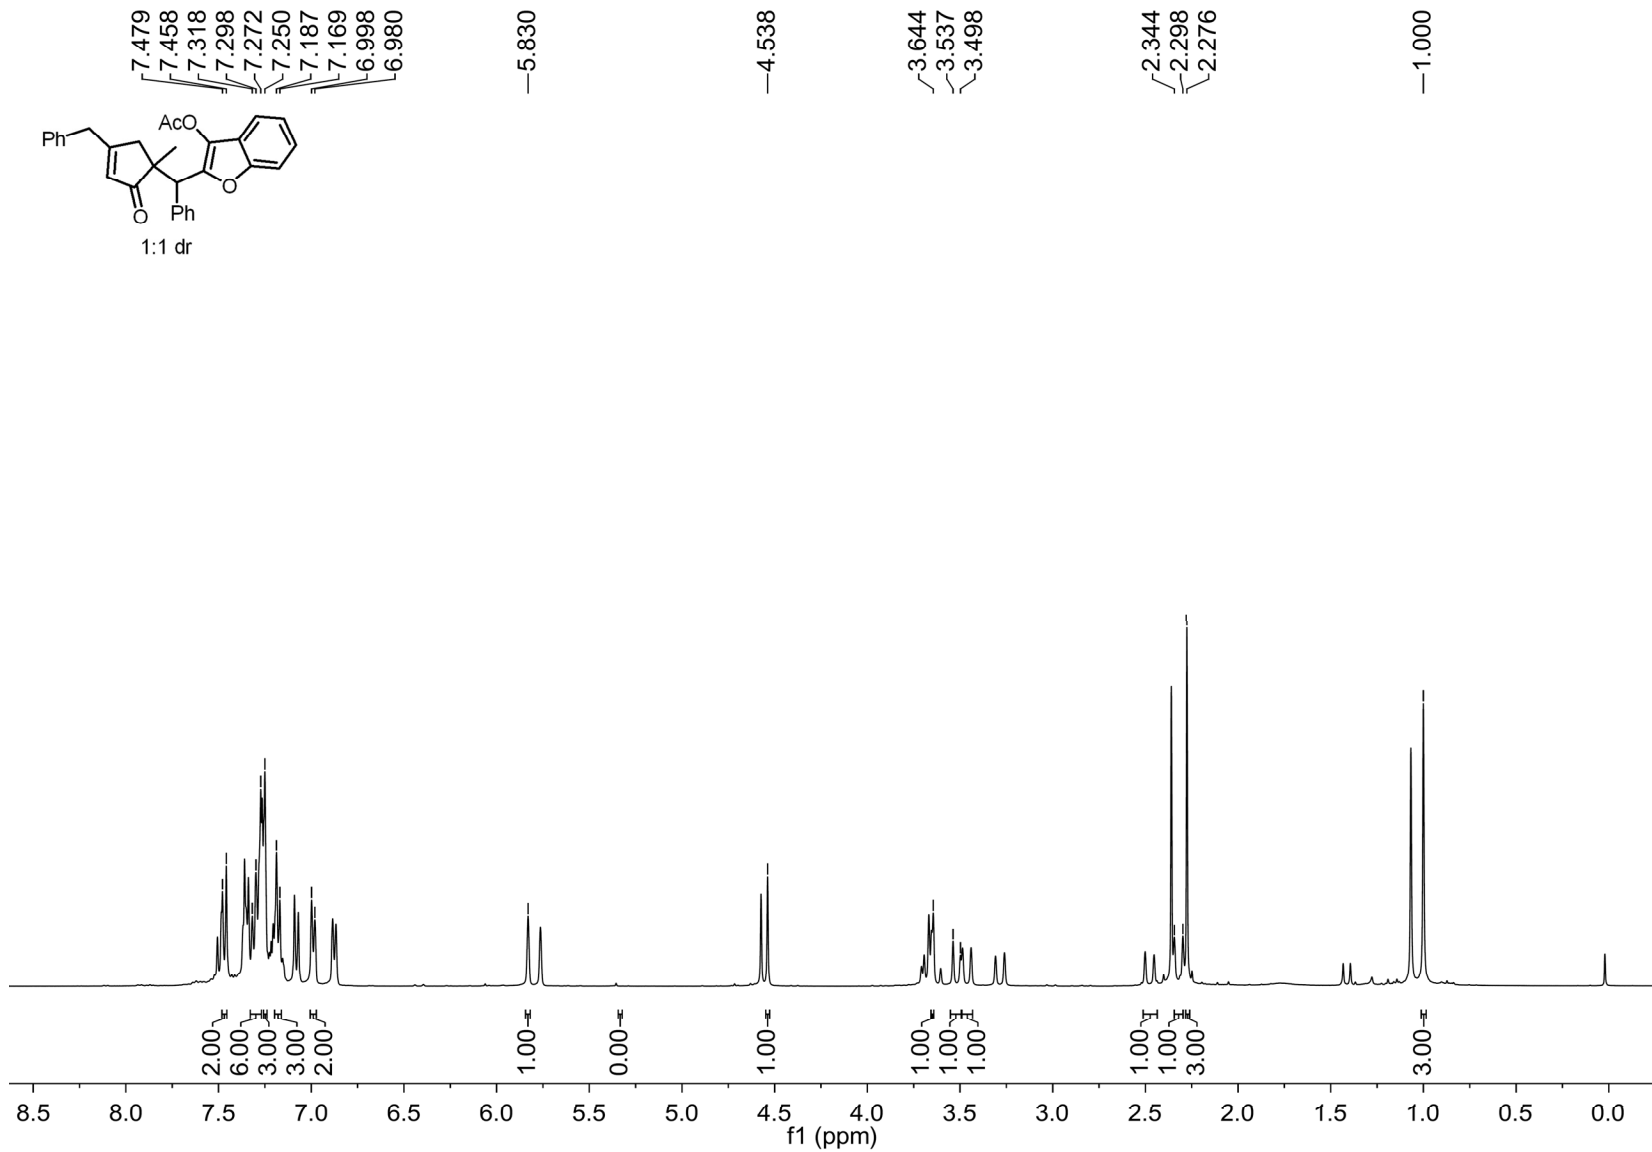

**<sup>1</sup>H NMR Spectrum of Compound 3i**

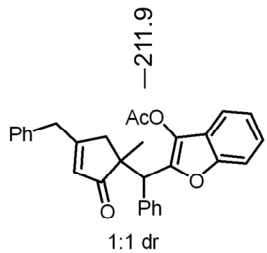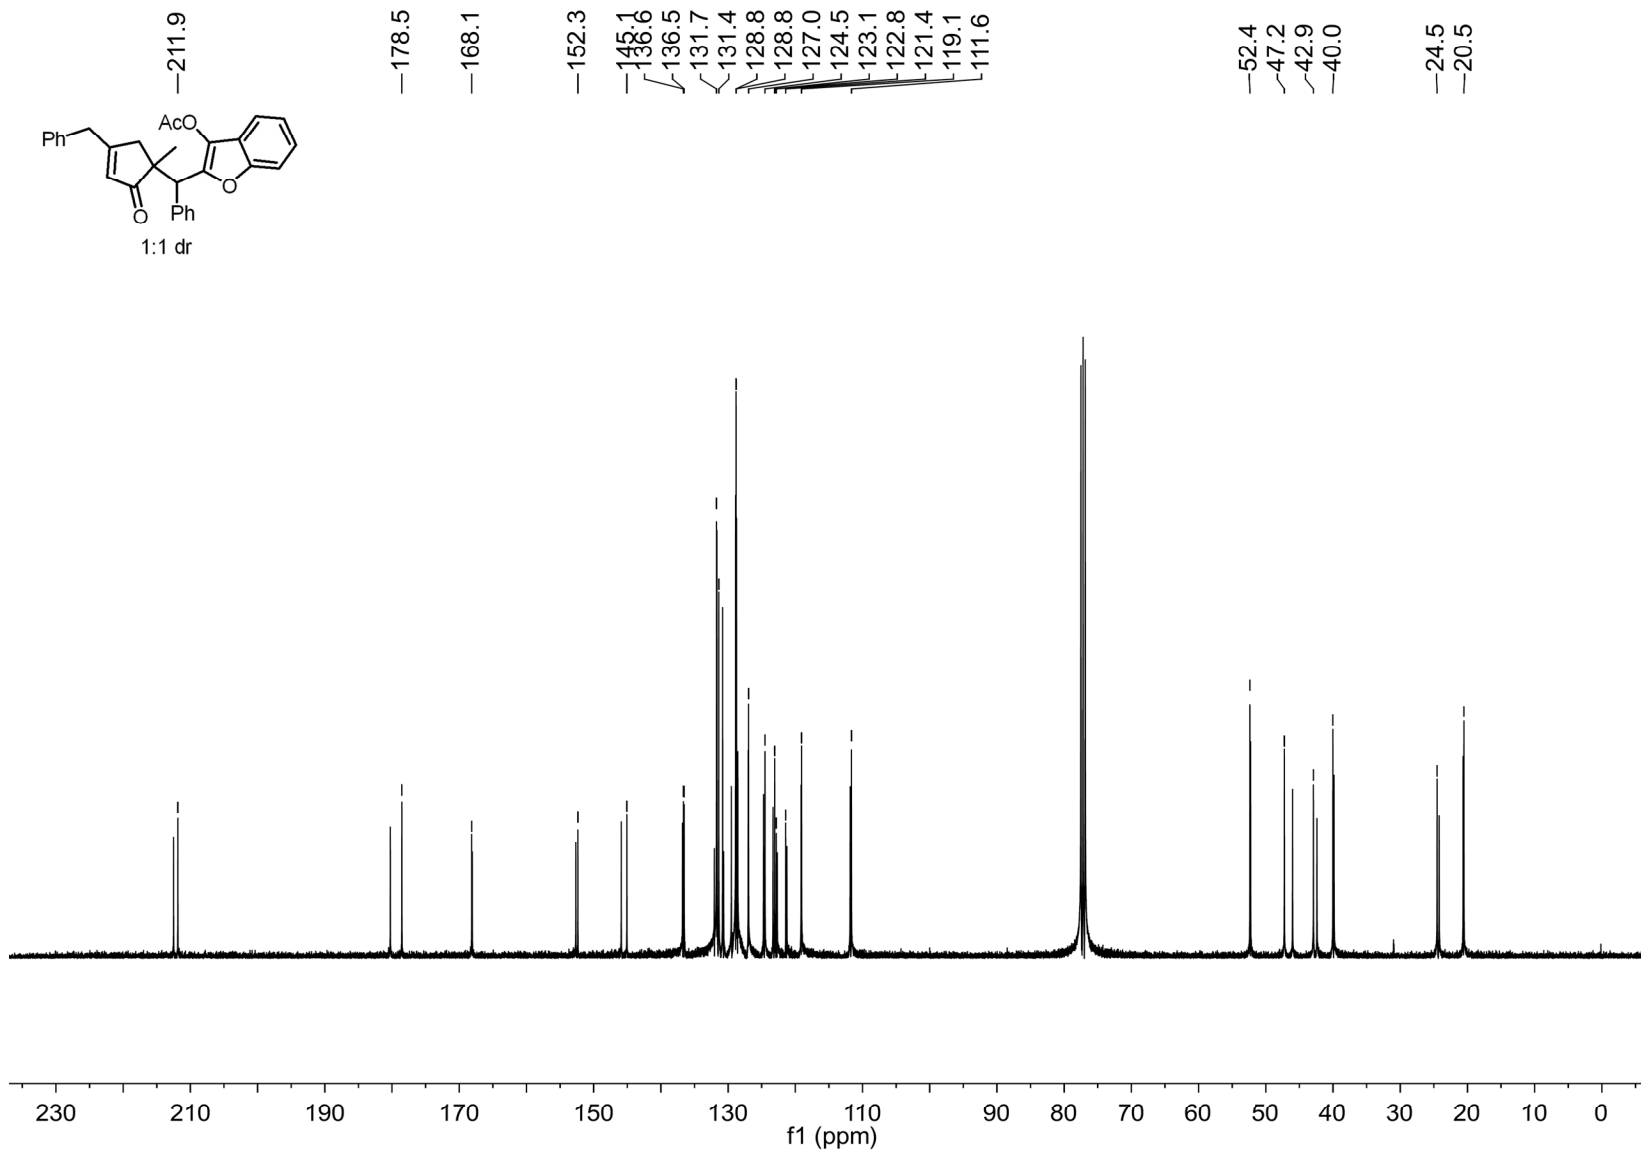

<sup>13</sup>C NMR Spectrum of Compound 3i



25042021-TU8478

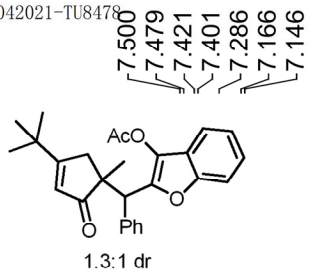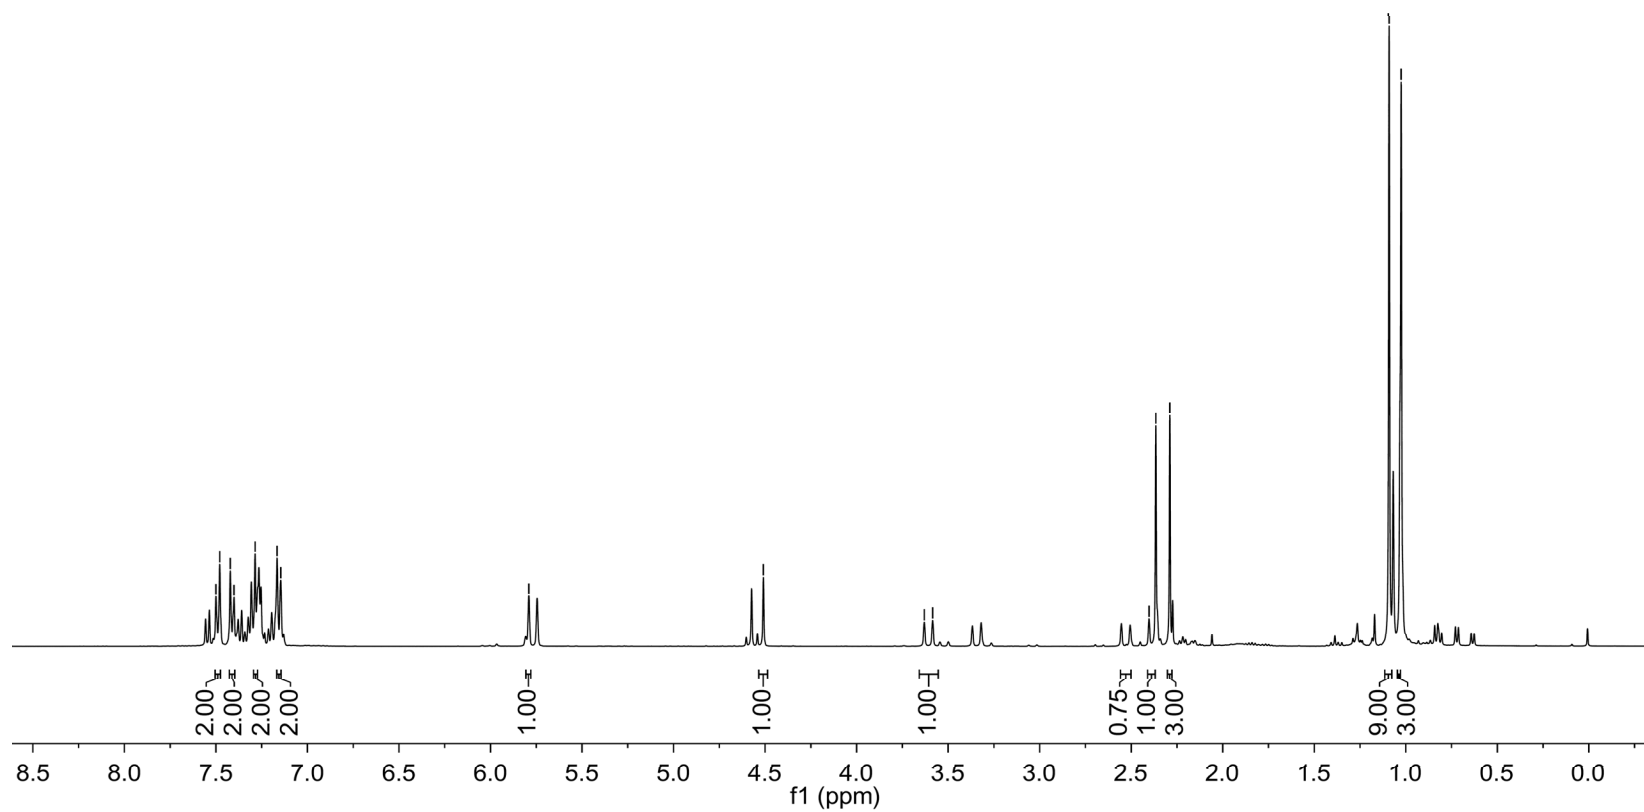

<sup>1</sup>H NMR Spectrum of Compound 3j

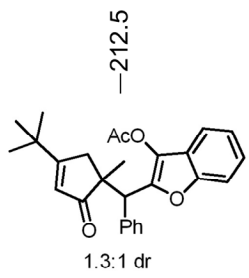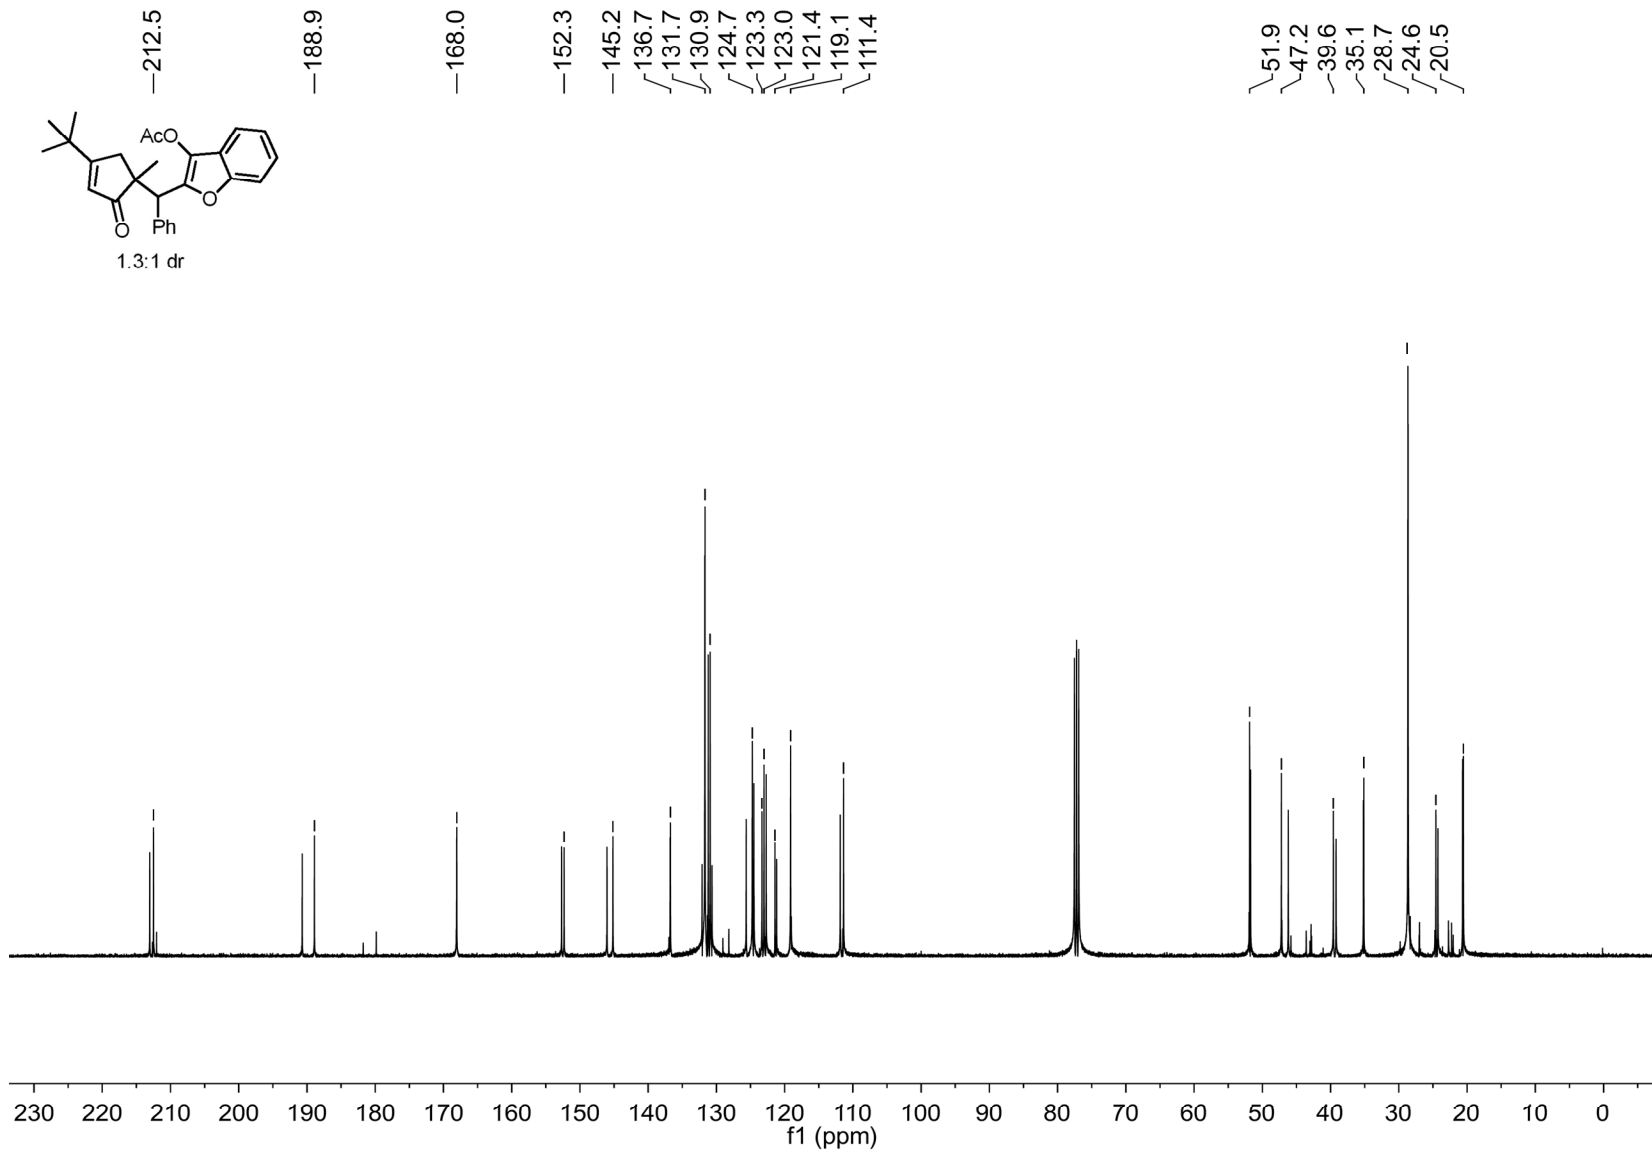

<sup>13</sup>C NMR Spectrum of Compound 3j

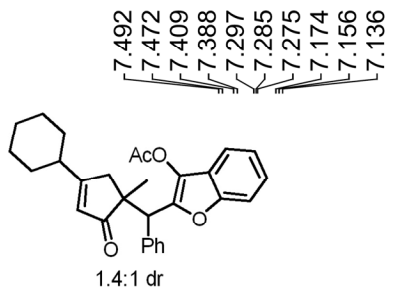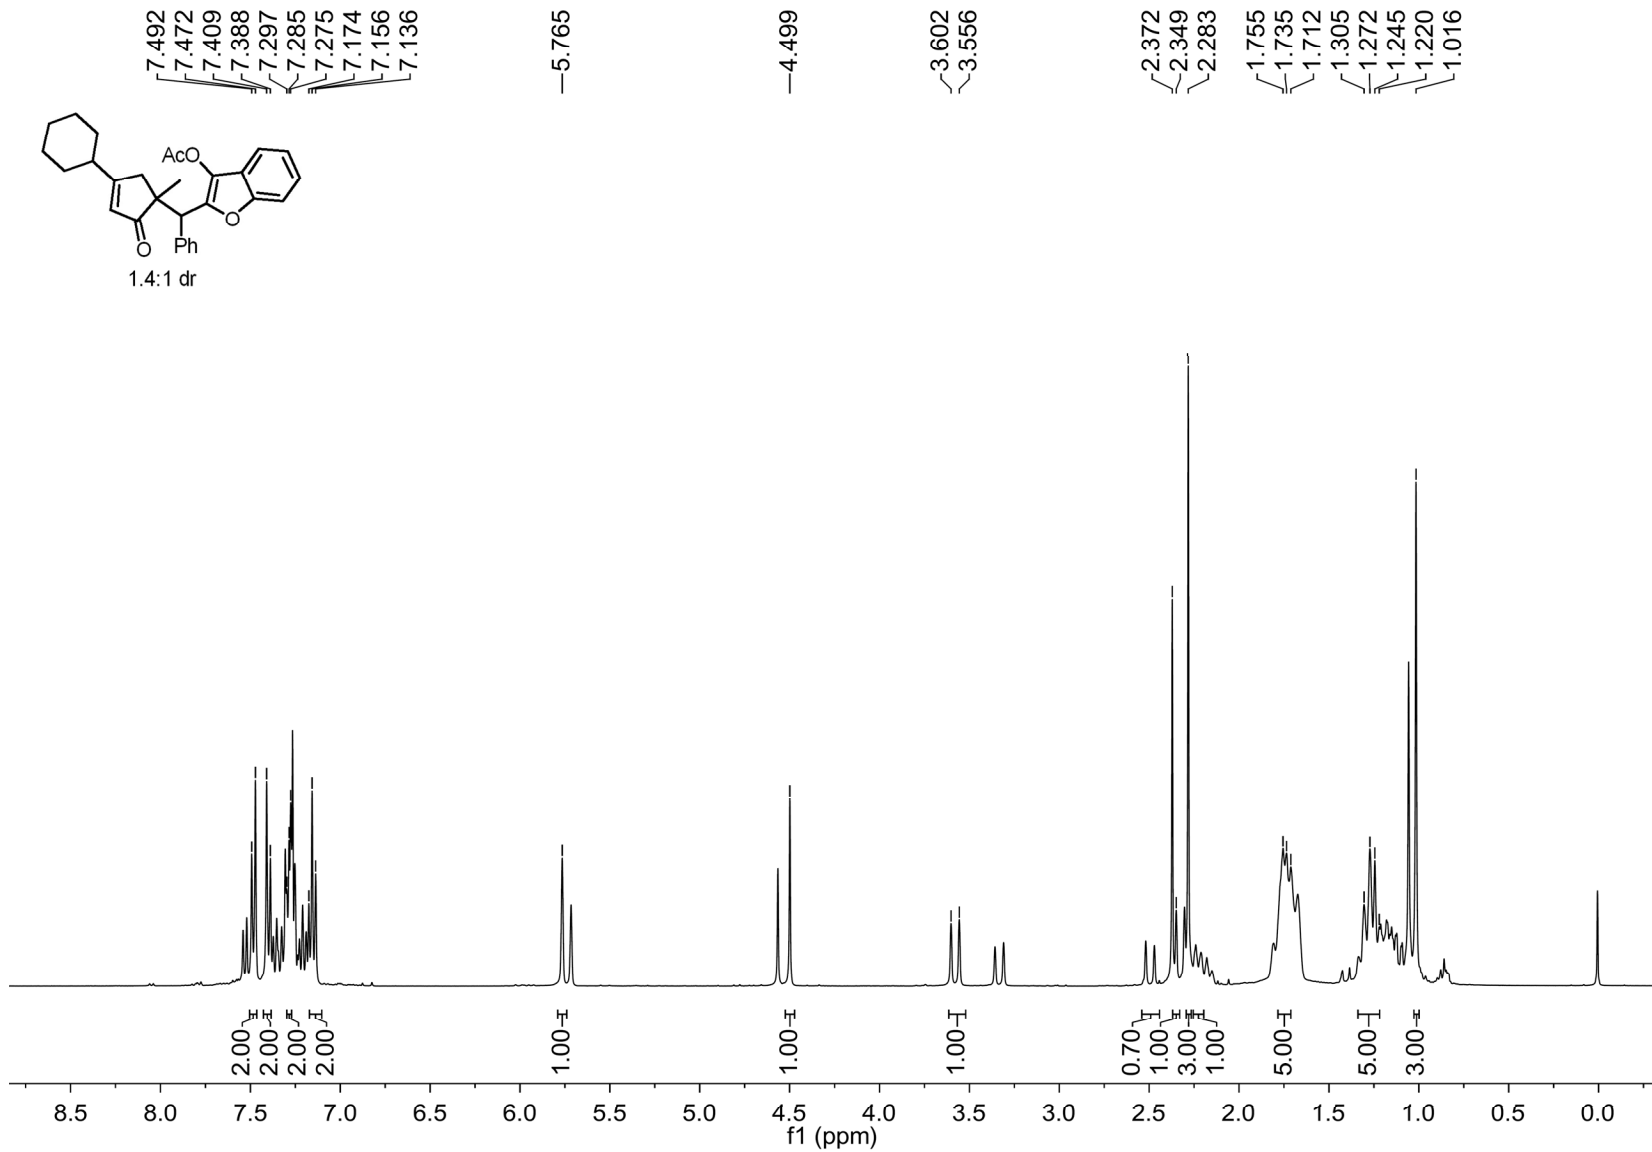

**<sup>1</sup>H NMR Spectrum of Compound 3k**

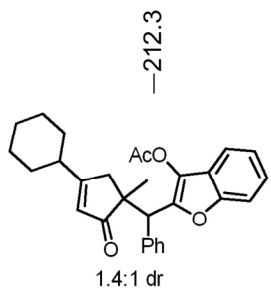

—212.3

—185.3

—168.1

—152.3

—145.2

—136.8

—131.6

—131.2

—125.4

—124.5

—123.0

—122.7

—121.4

—119.1

—111.4

~51.5

~47.2

~41.9

~41.5

~31.0

~25.9

~24.6

~20.5

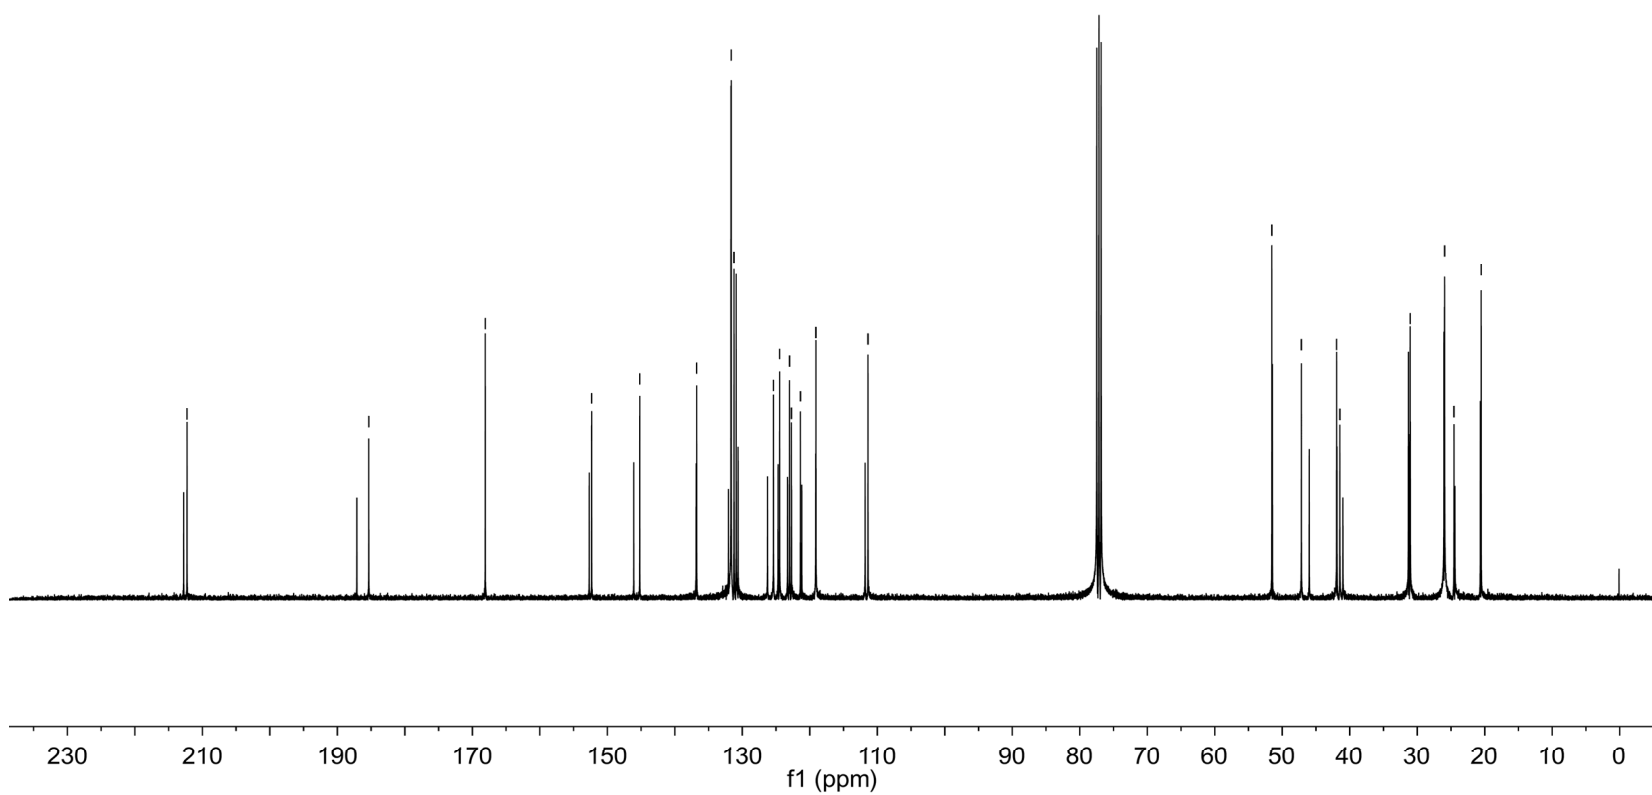

<sup>13</sup>C NMR Spectrum of Compound 3k

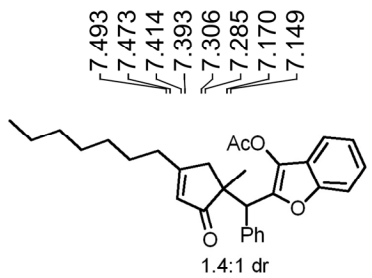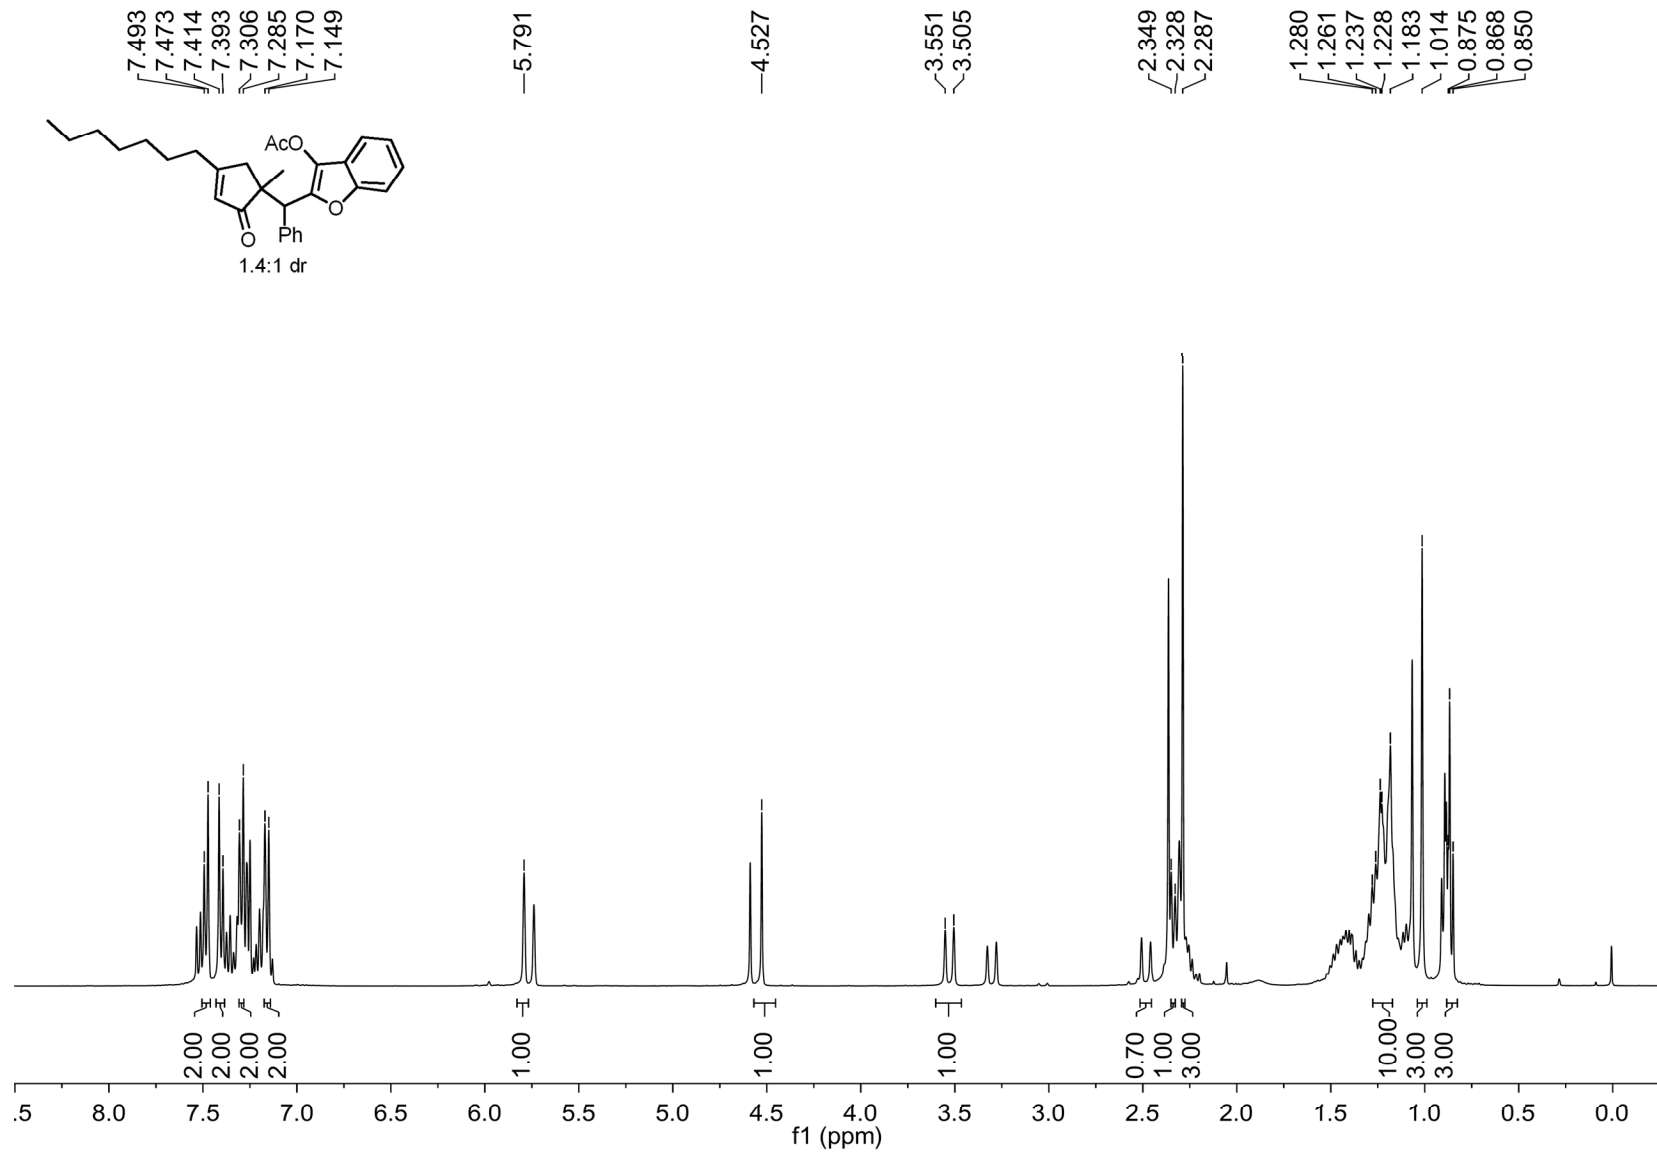

**<sup>1</sup>H NMR Spectrum of Compound 31**

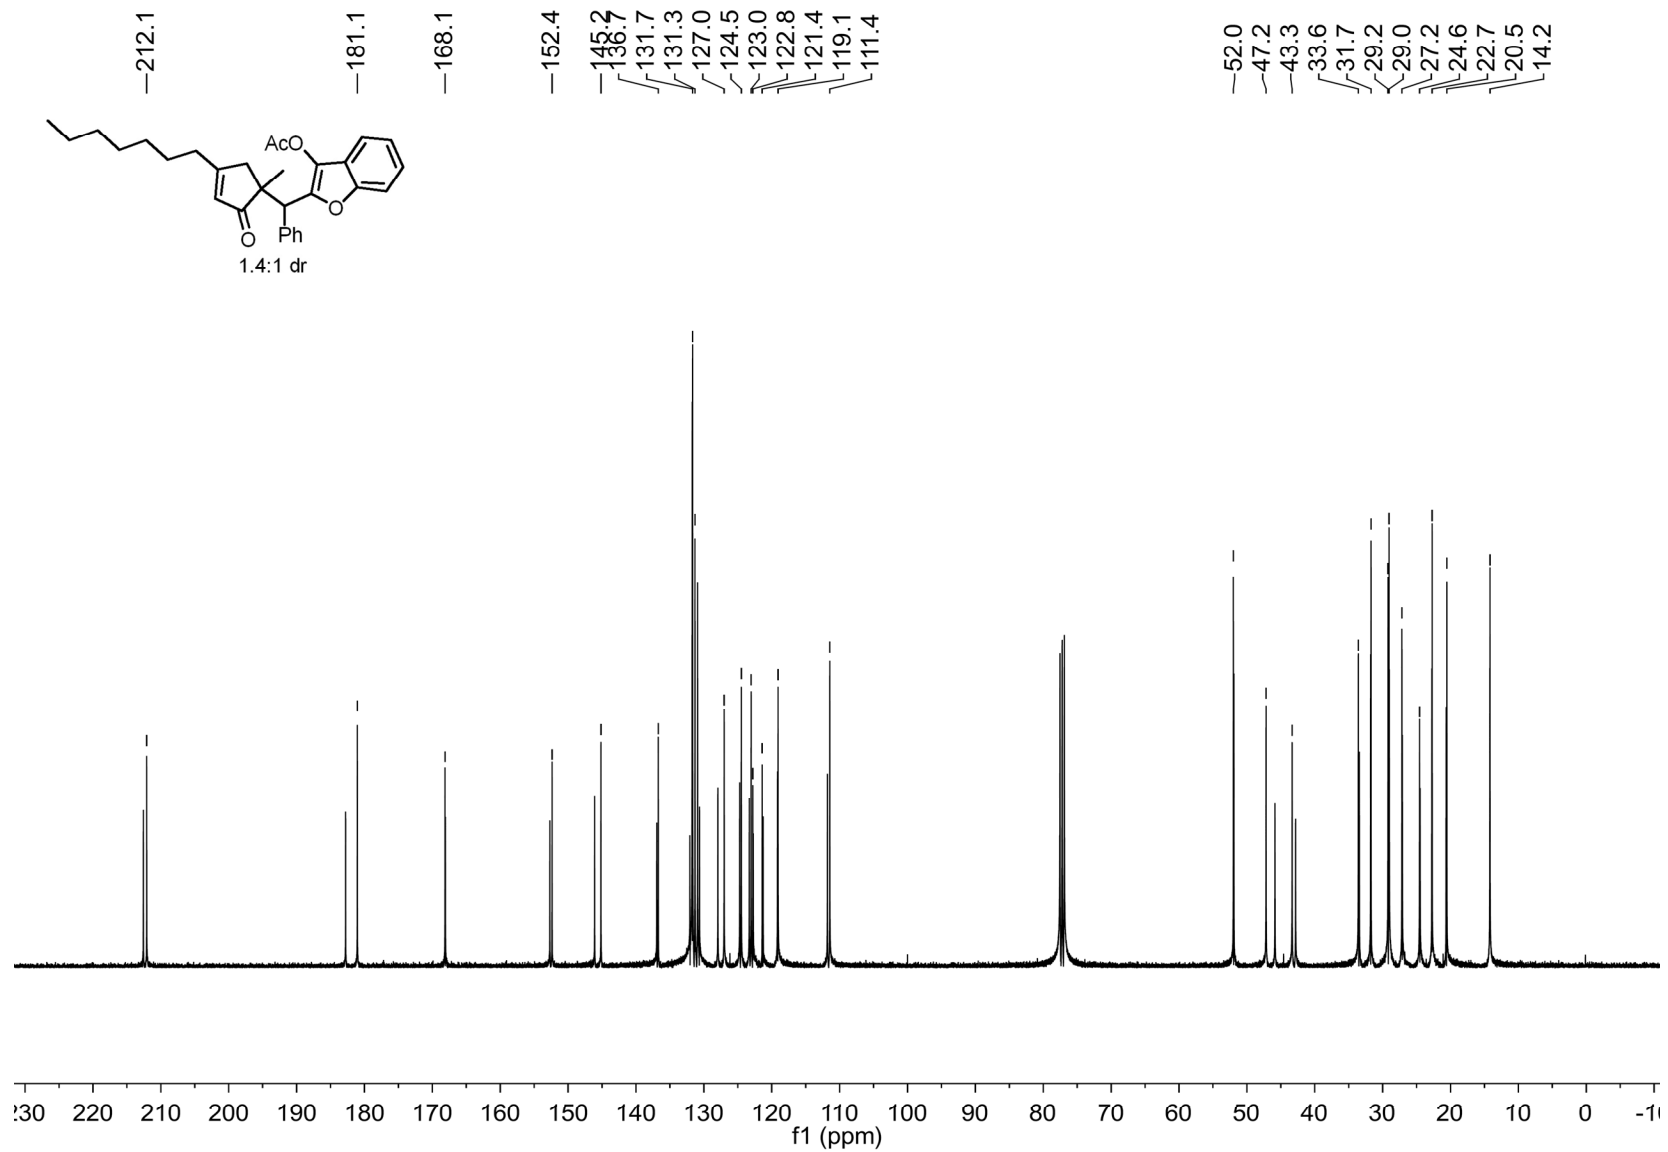

<sup>13</sup>C NMR Spectrum of Compound 31

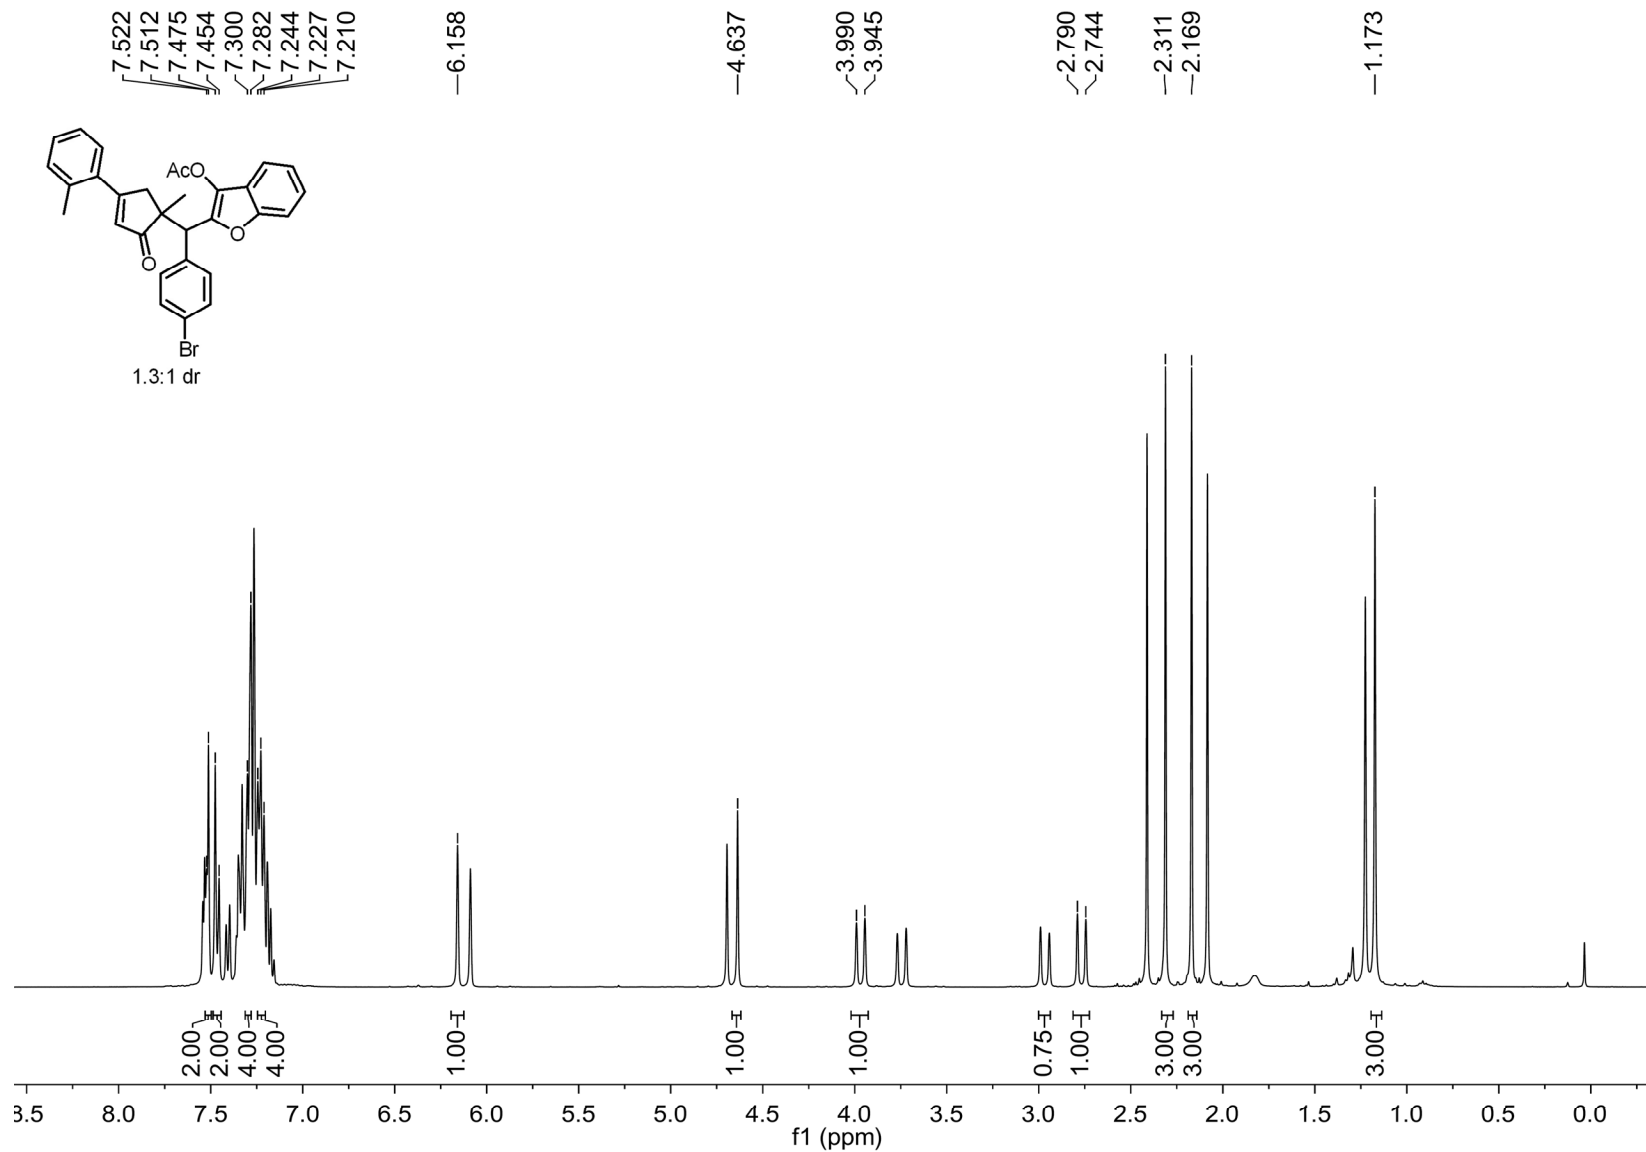

**<sup>1</sup>H NMR Spectrum of Compound 3m**

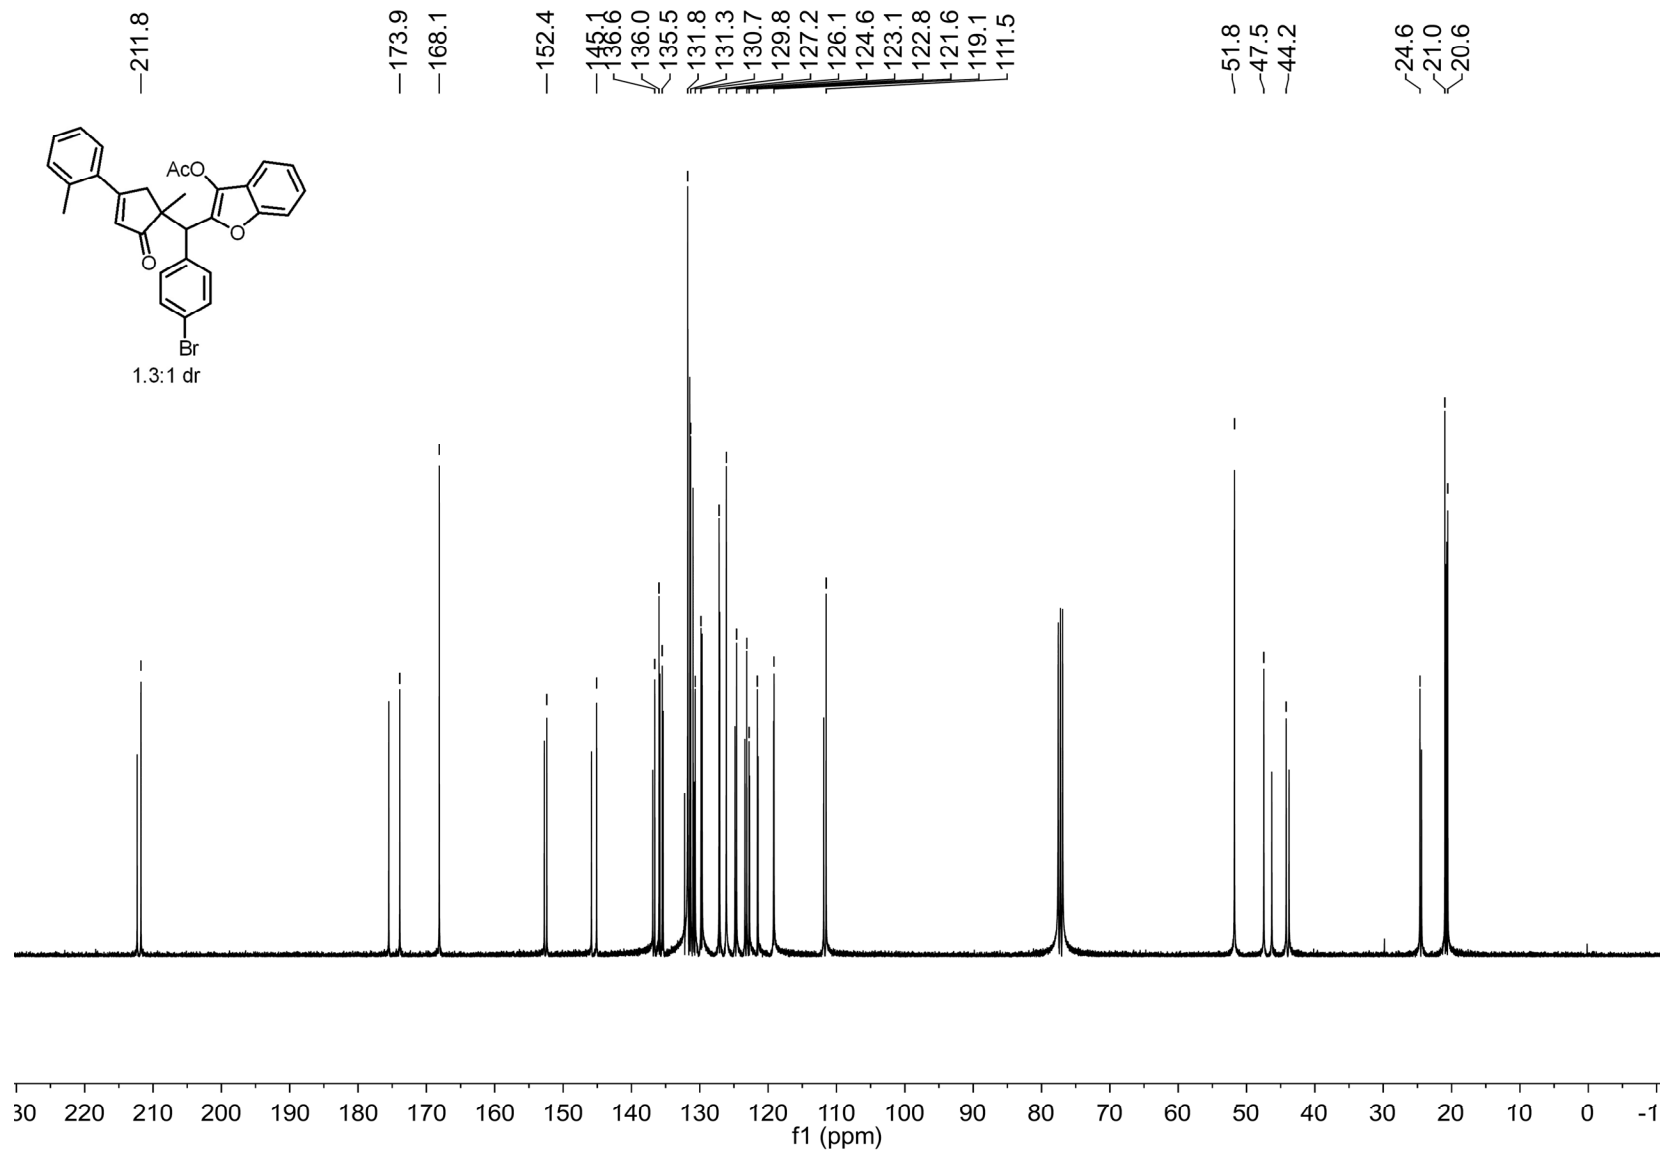

$^{13}\text{C}$  NMR Spectrum of Compound 3m



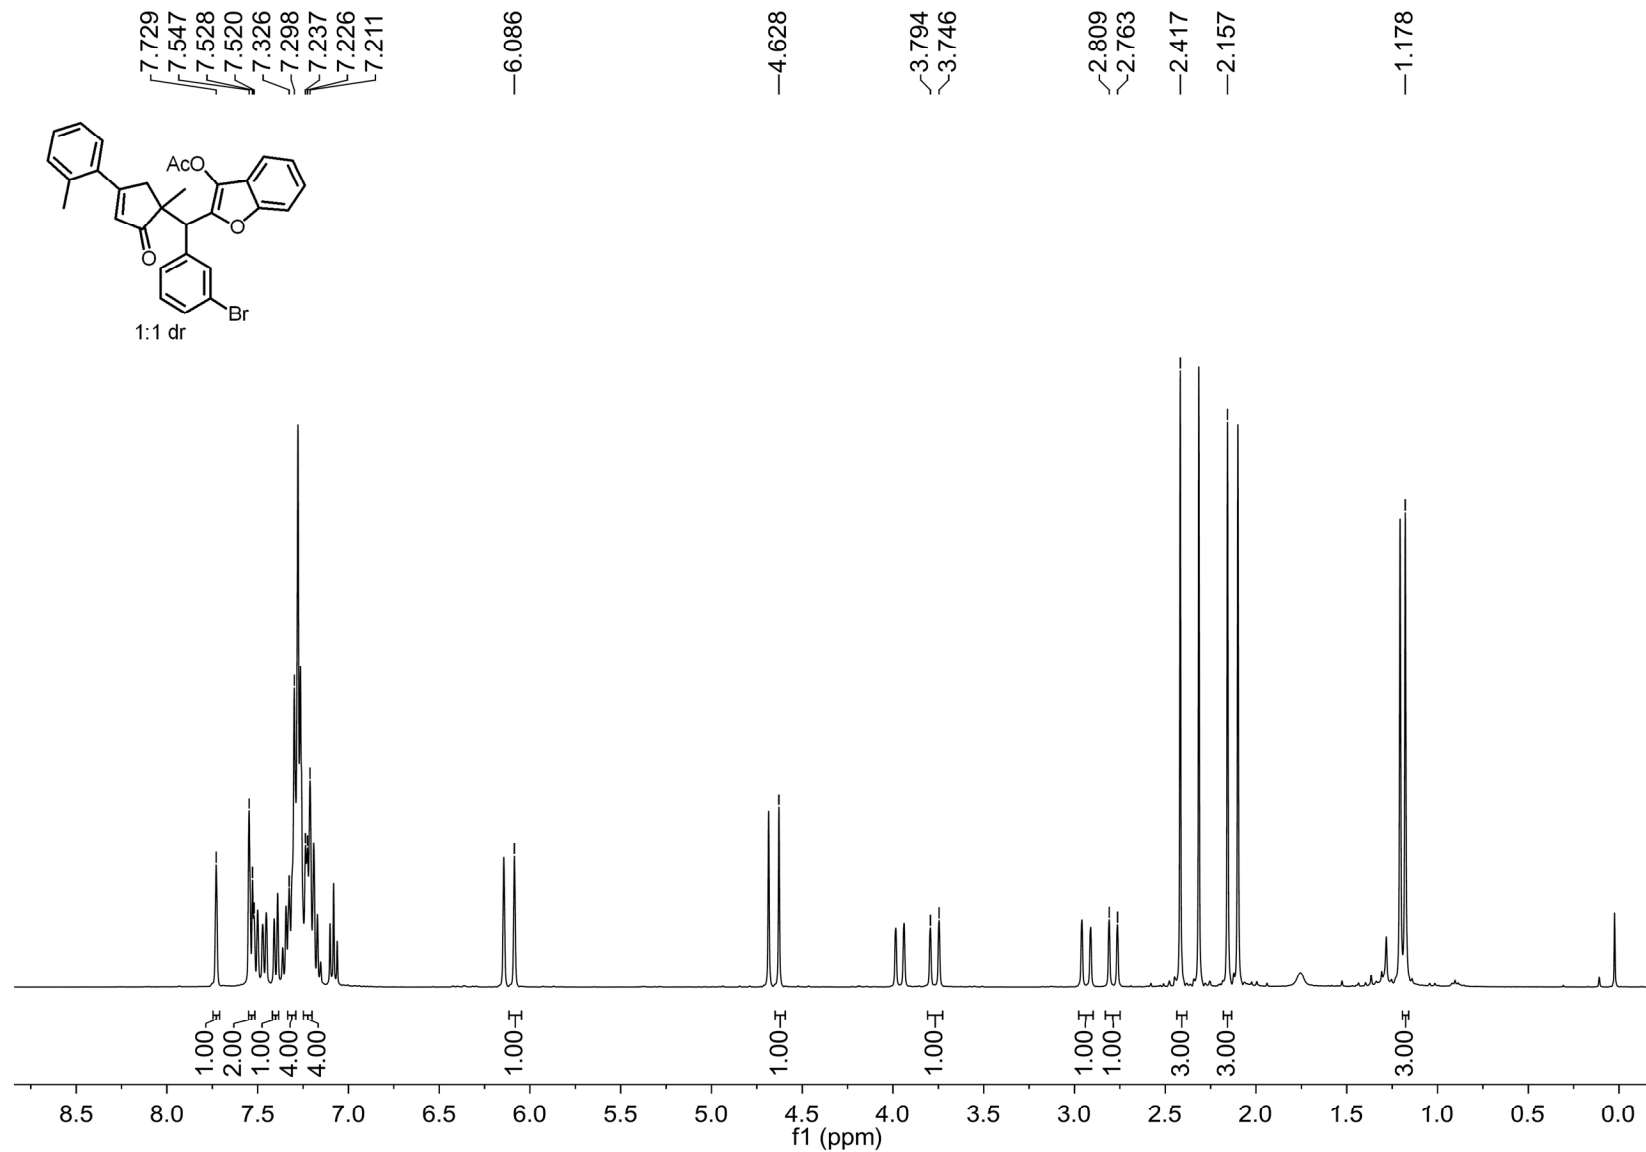

**<sup>1</sup>H NMR Spectrum of Compound 3n**

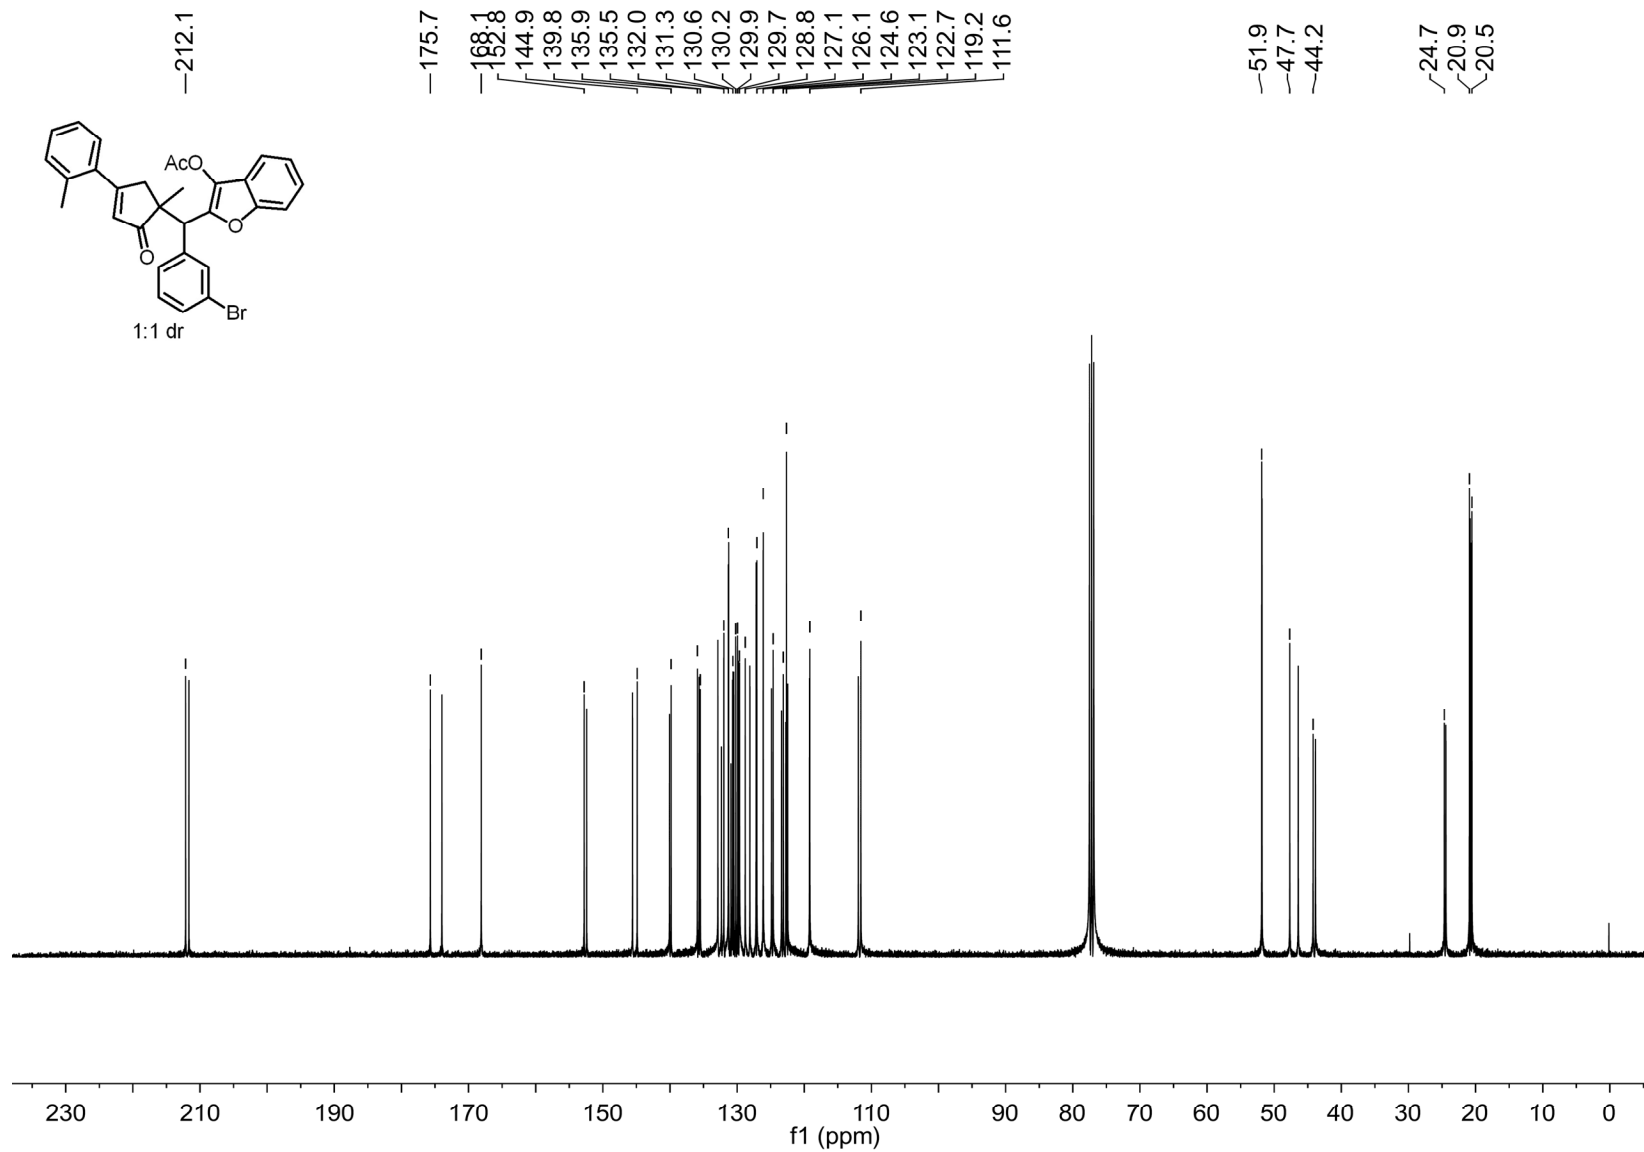

$^{13}\text{C}$  NMR Spectrum of Compound 3n

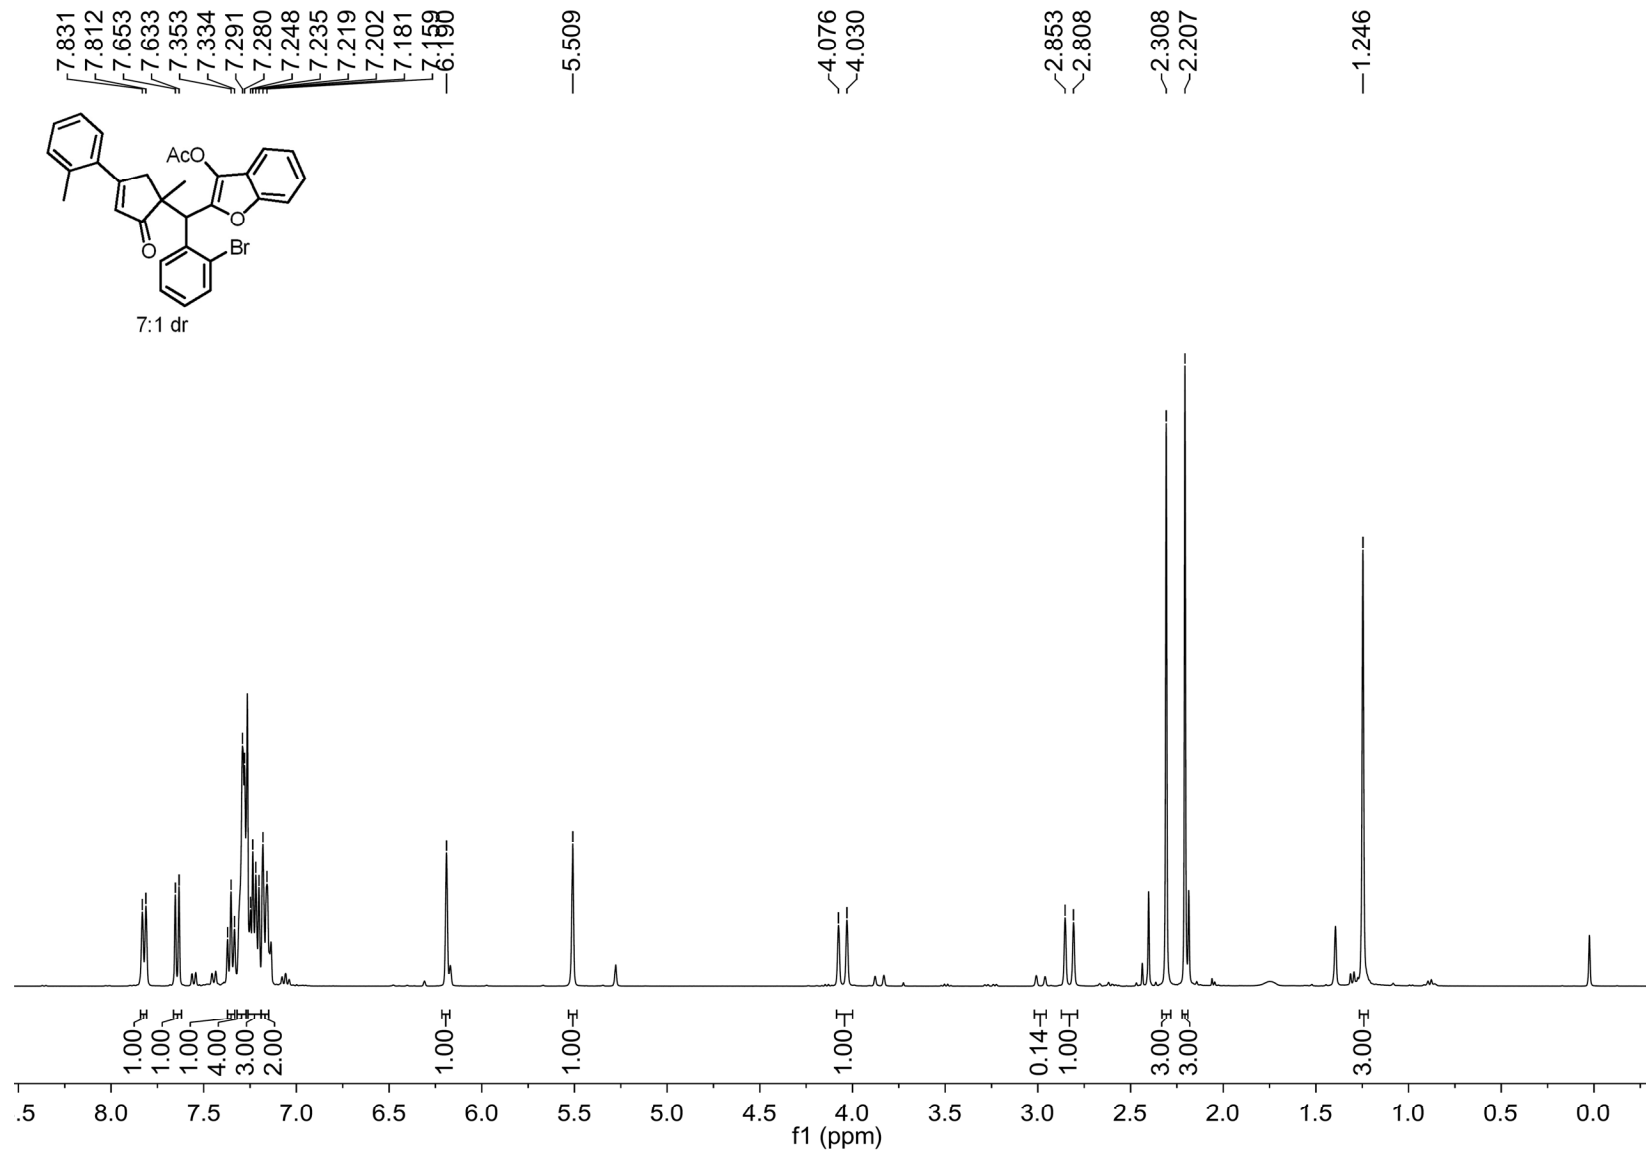

<sup>1</sup>H NMR Spectrum of Compound 30

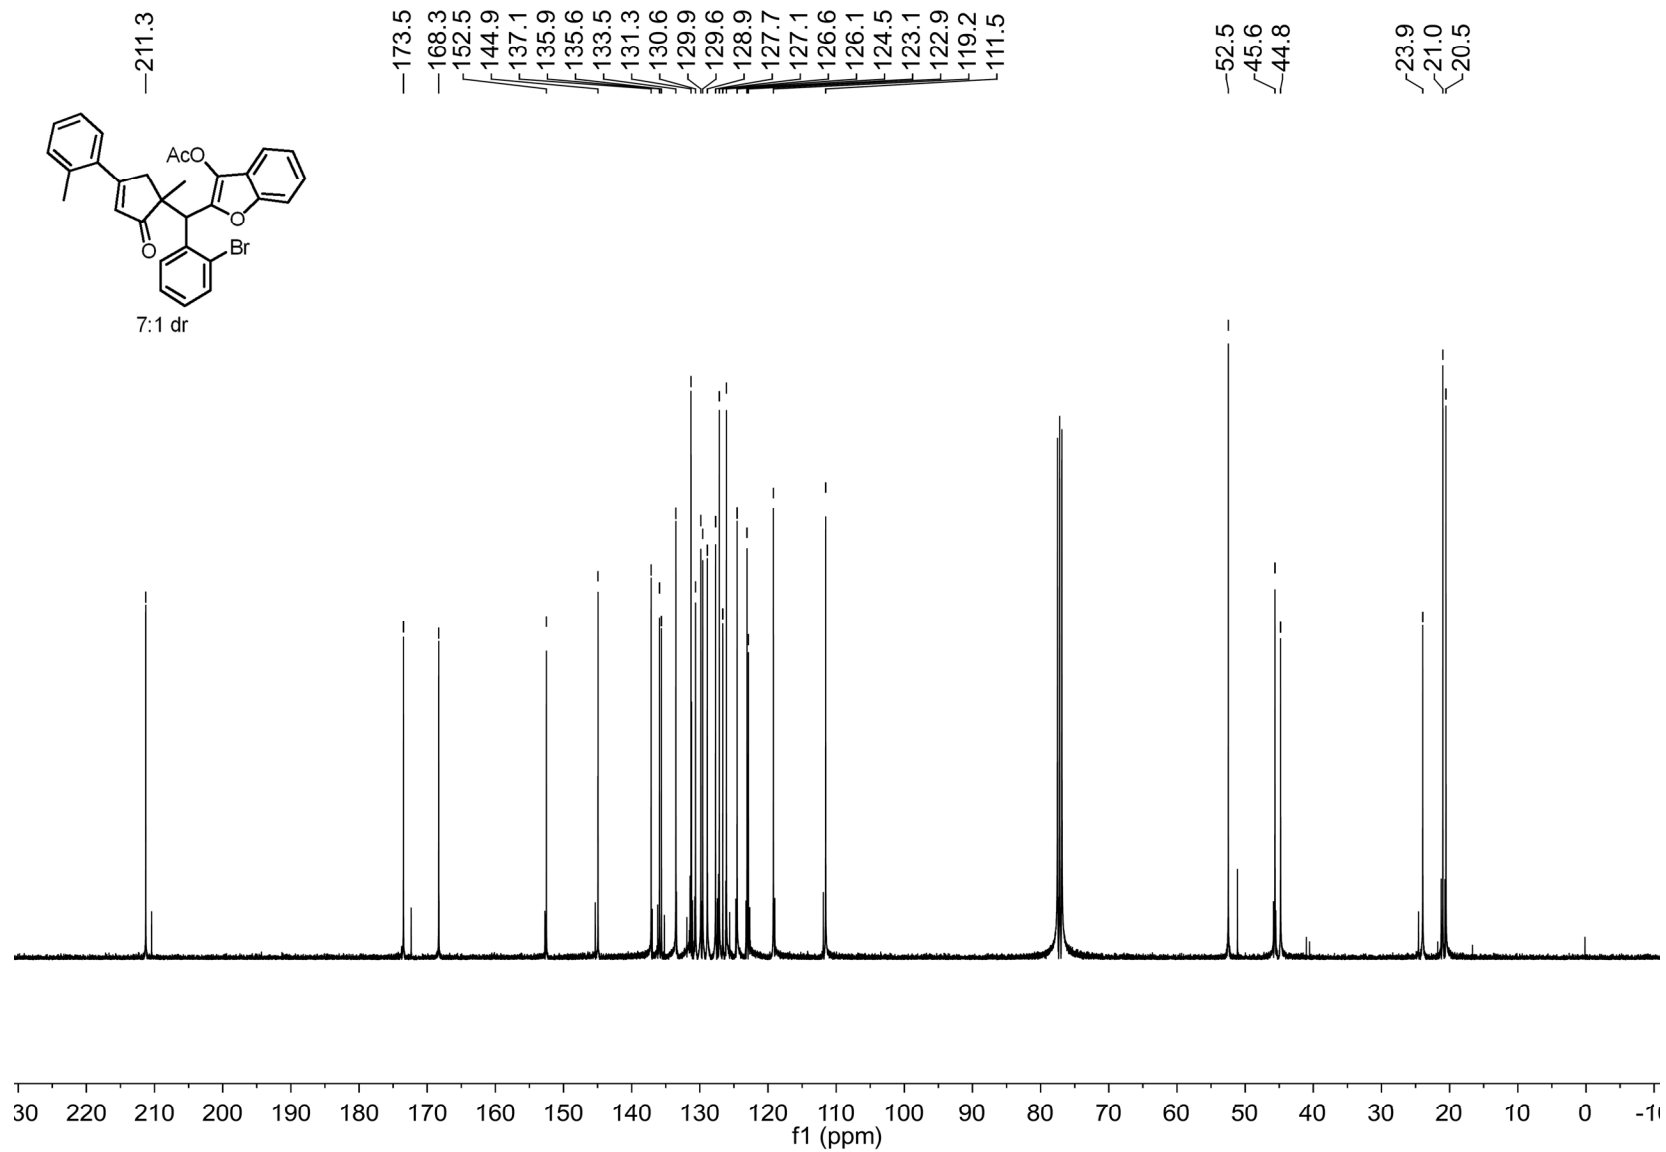

$^{13}\text{C}$  NMR Spectrum of Compound 30

15042021-TU8157

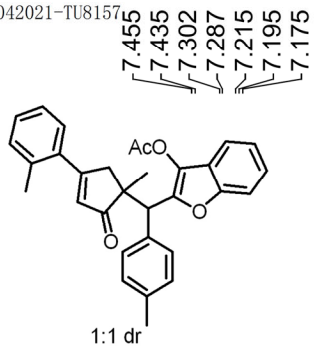

7.455  
7.435  
7.302  
7.287  
7.215  
7.195  
7.175

-6.148

-4.616

3.837  
3.789

2.779  
2.733

2.396  
2.259  
2.175

-1.168

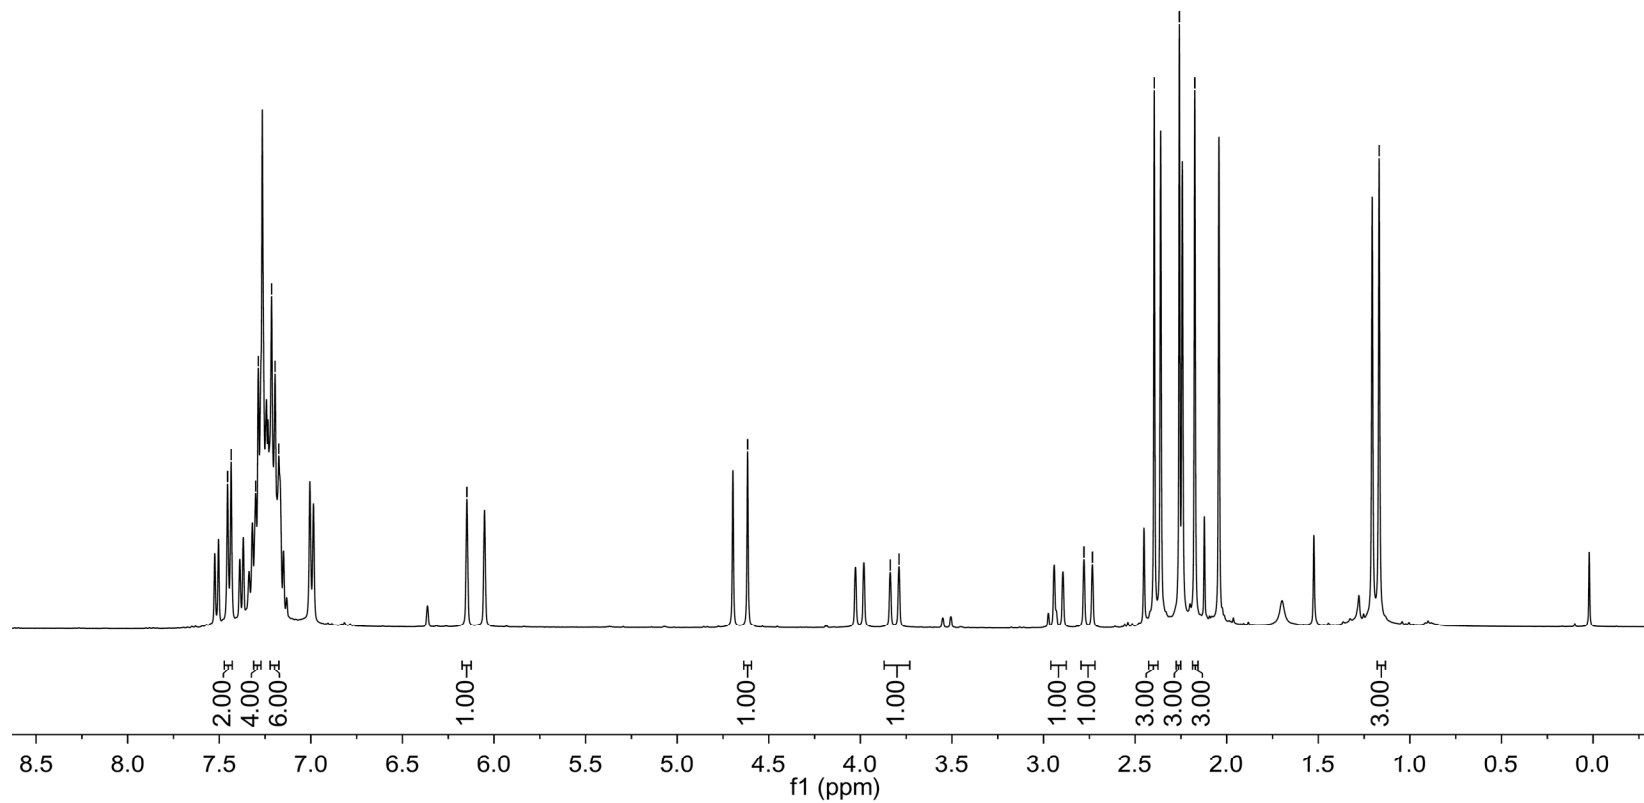

<sup>1</sup>H NMR Spectrum of Compound 3p

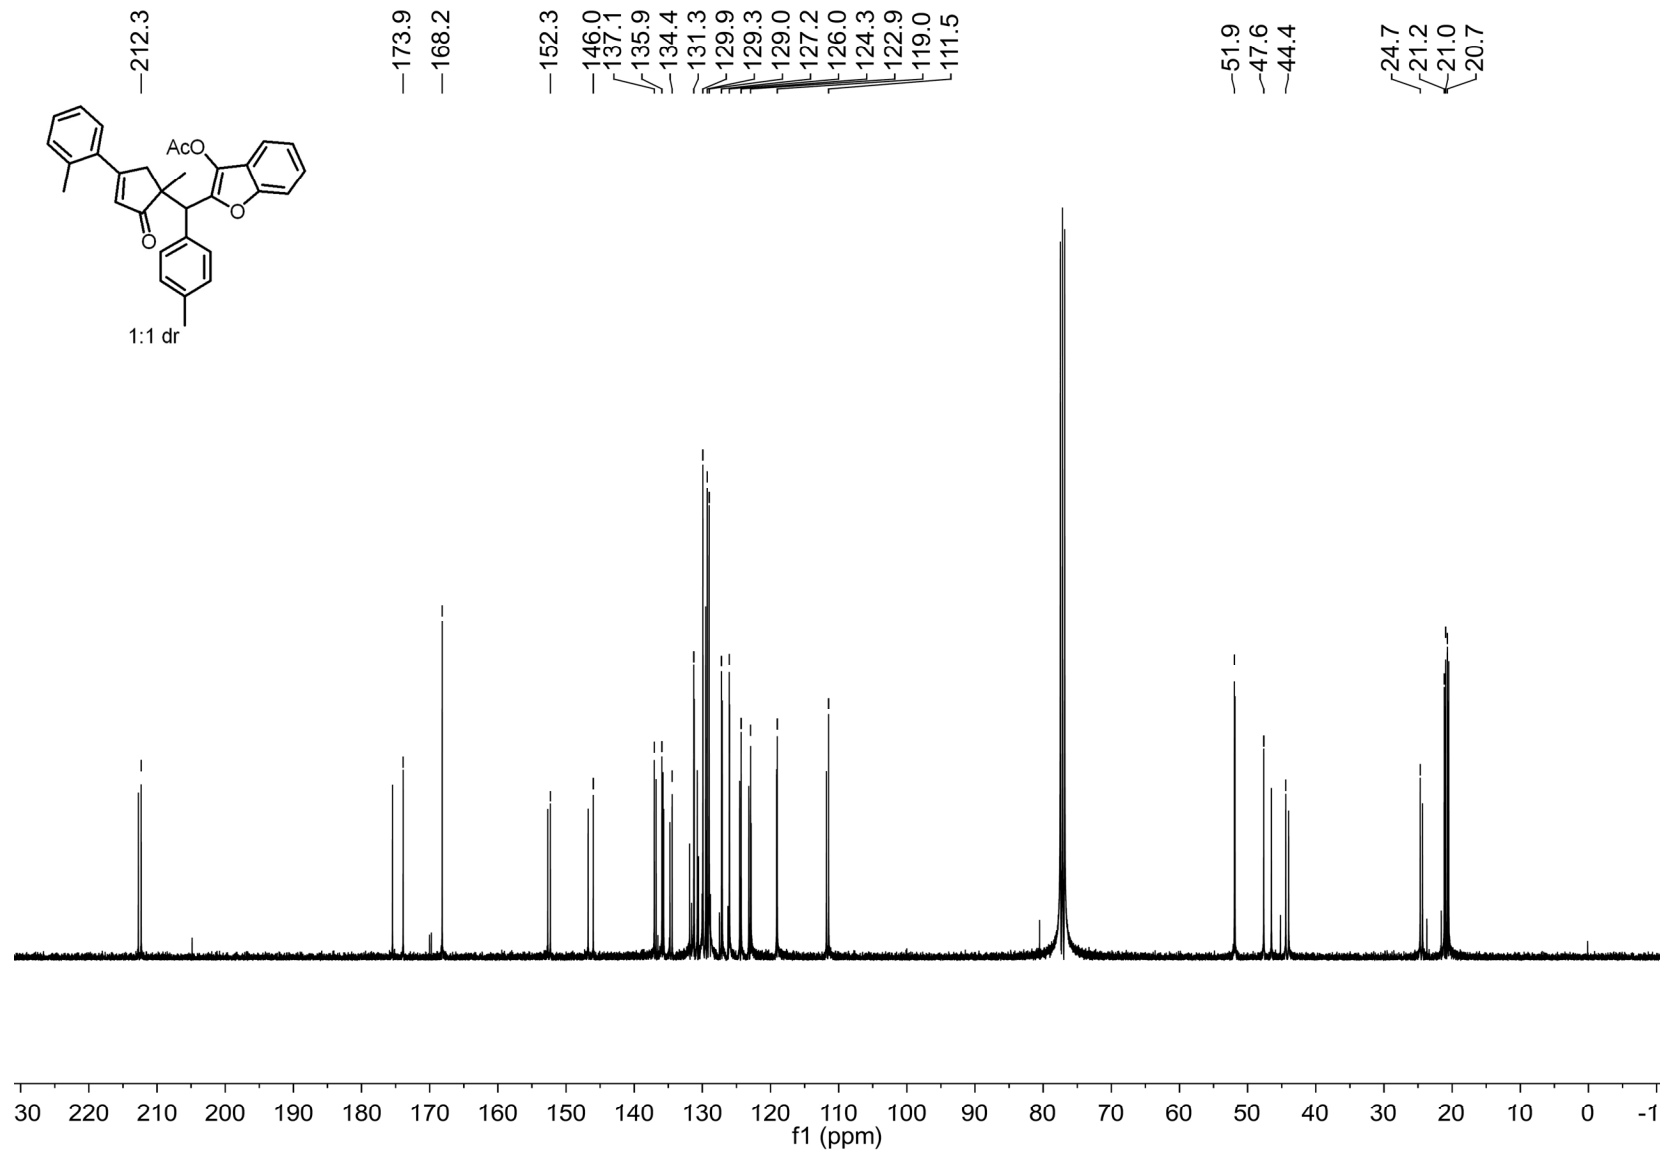

**<sup>13</sup>C NMR Spectrum of Compound 3p**

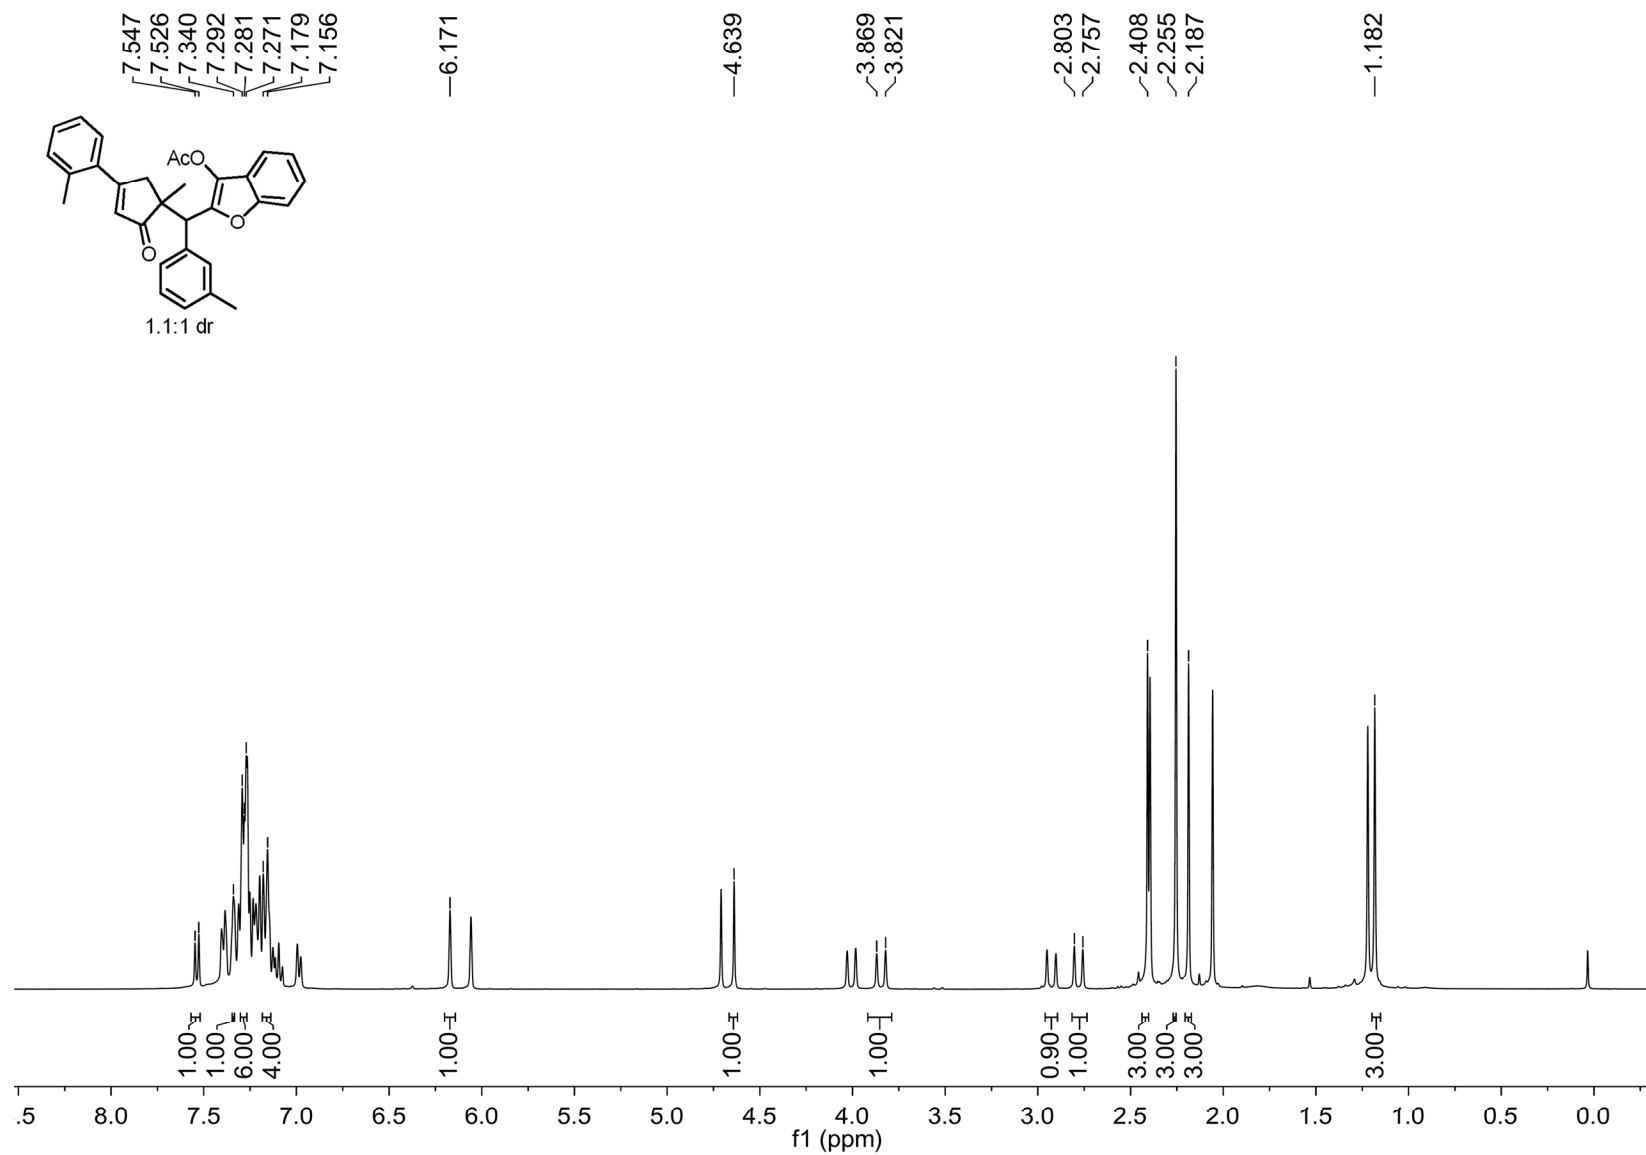

**<sup>1</sup>H NMR Spectrum of Compound 3q**

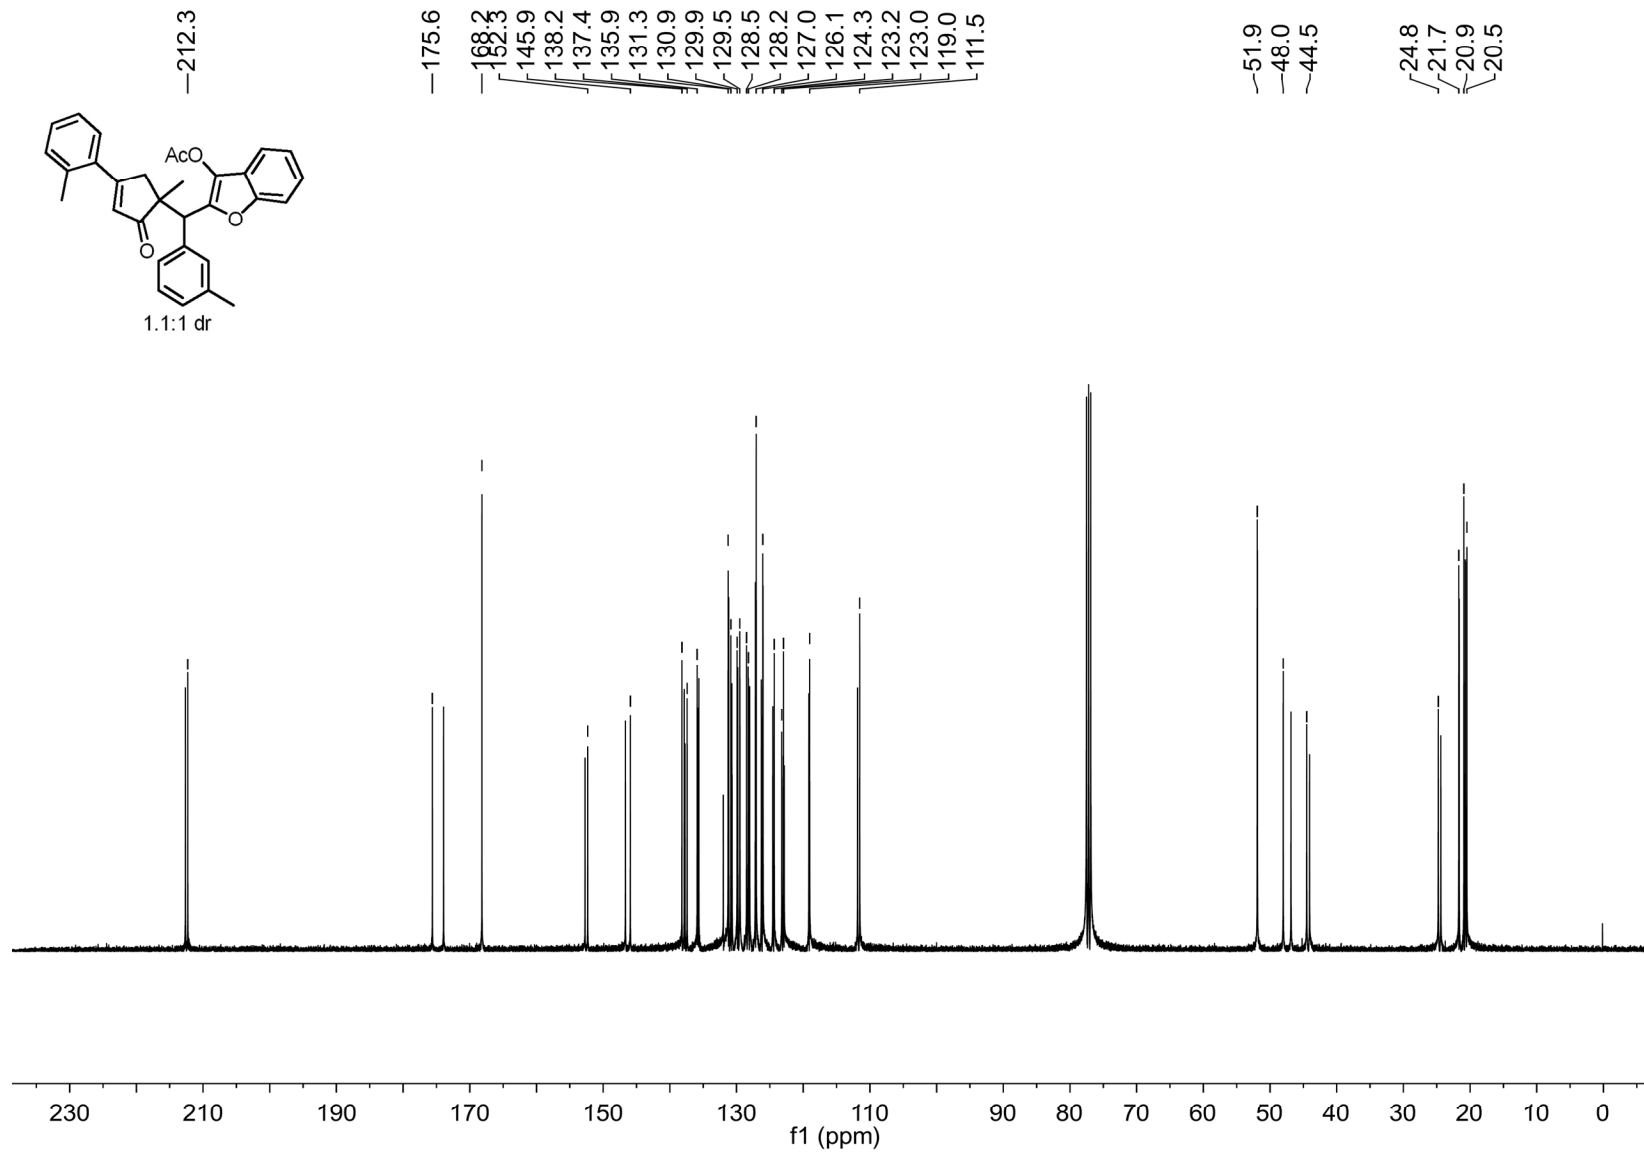

<sup>13</sup>C NMR Spectrum of Compound 3q



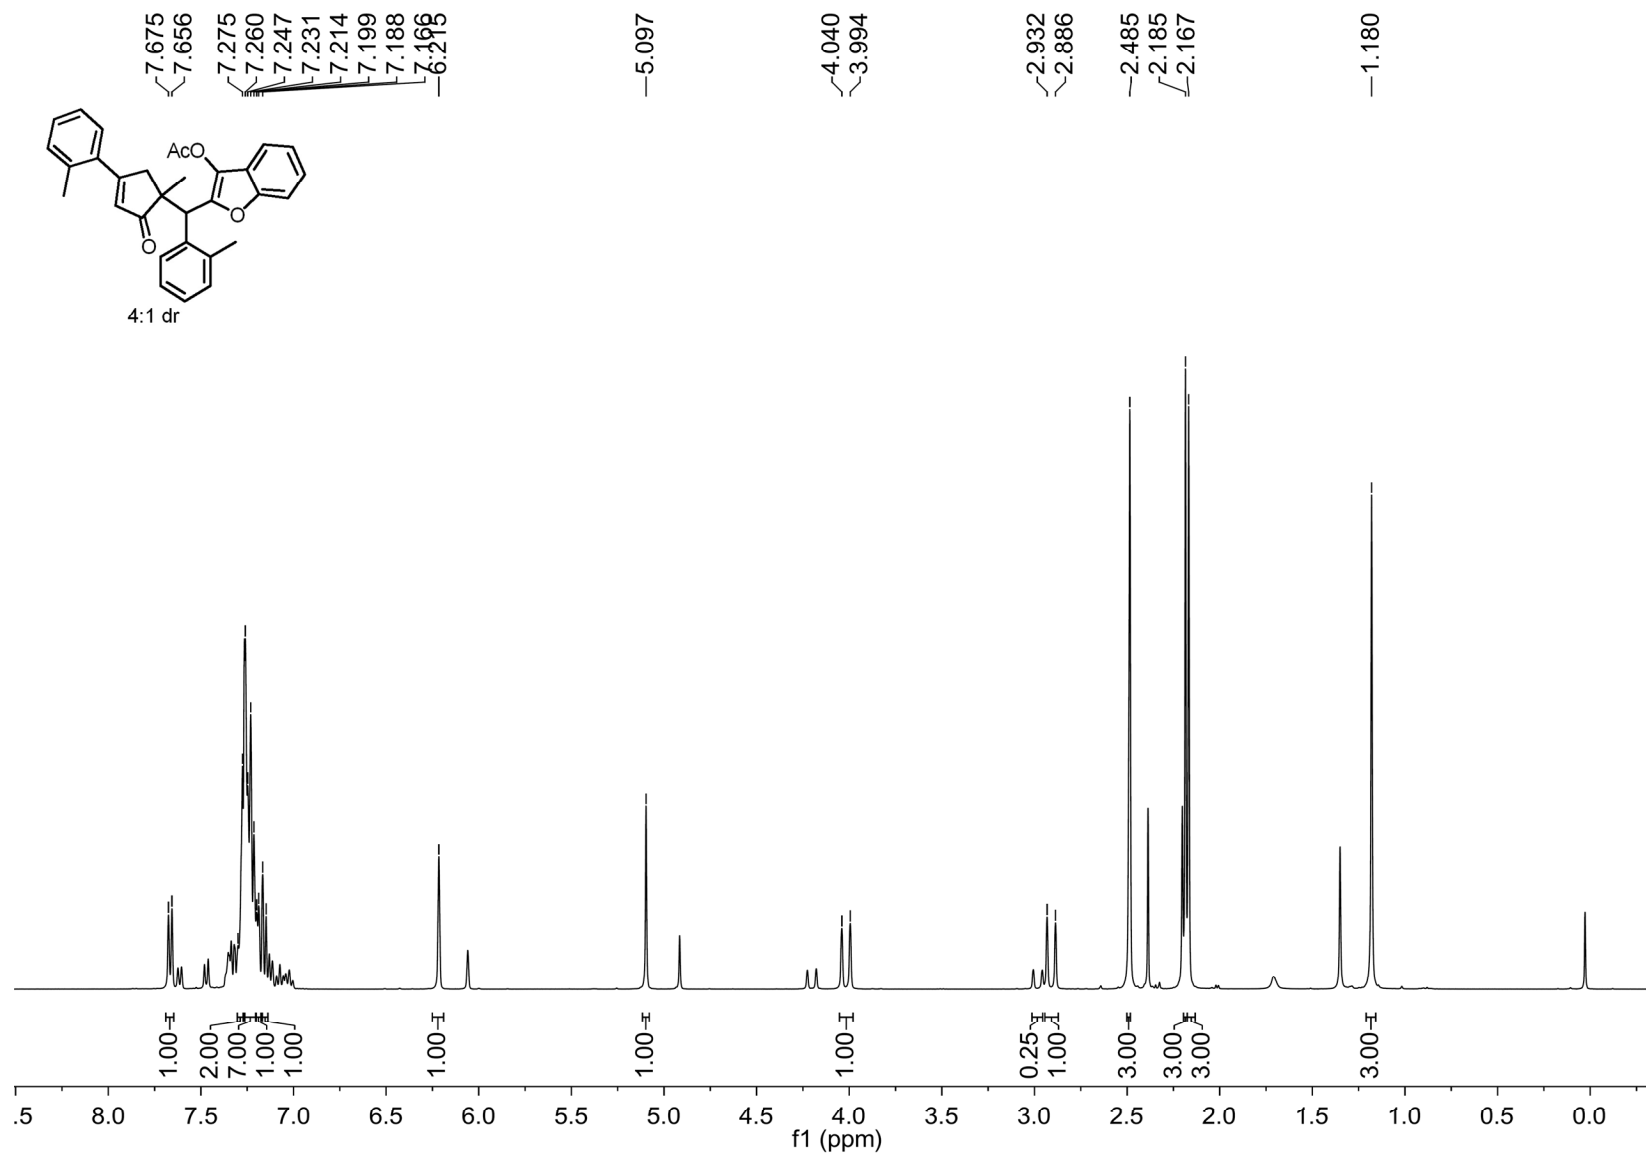

**<sup>1</sup>H NMR Spectrum of Compound 3r**

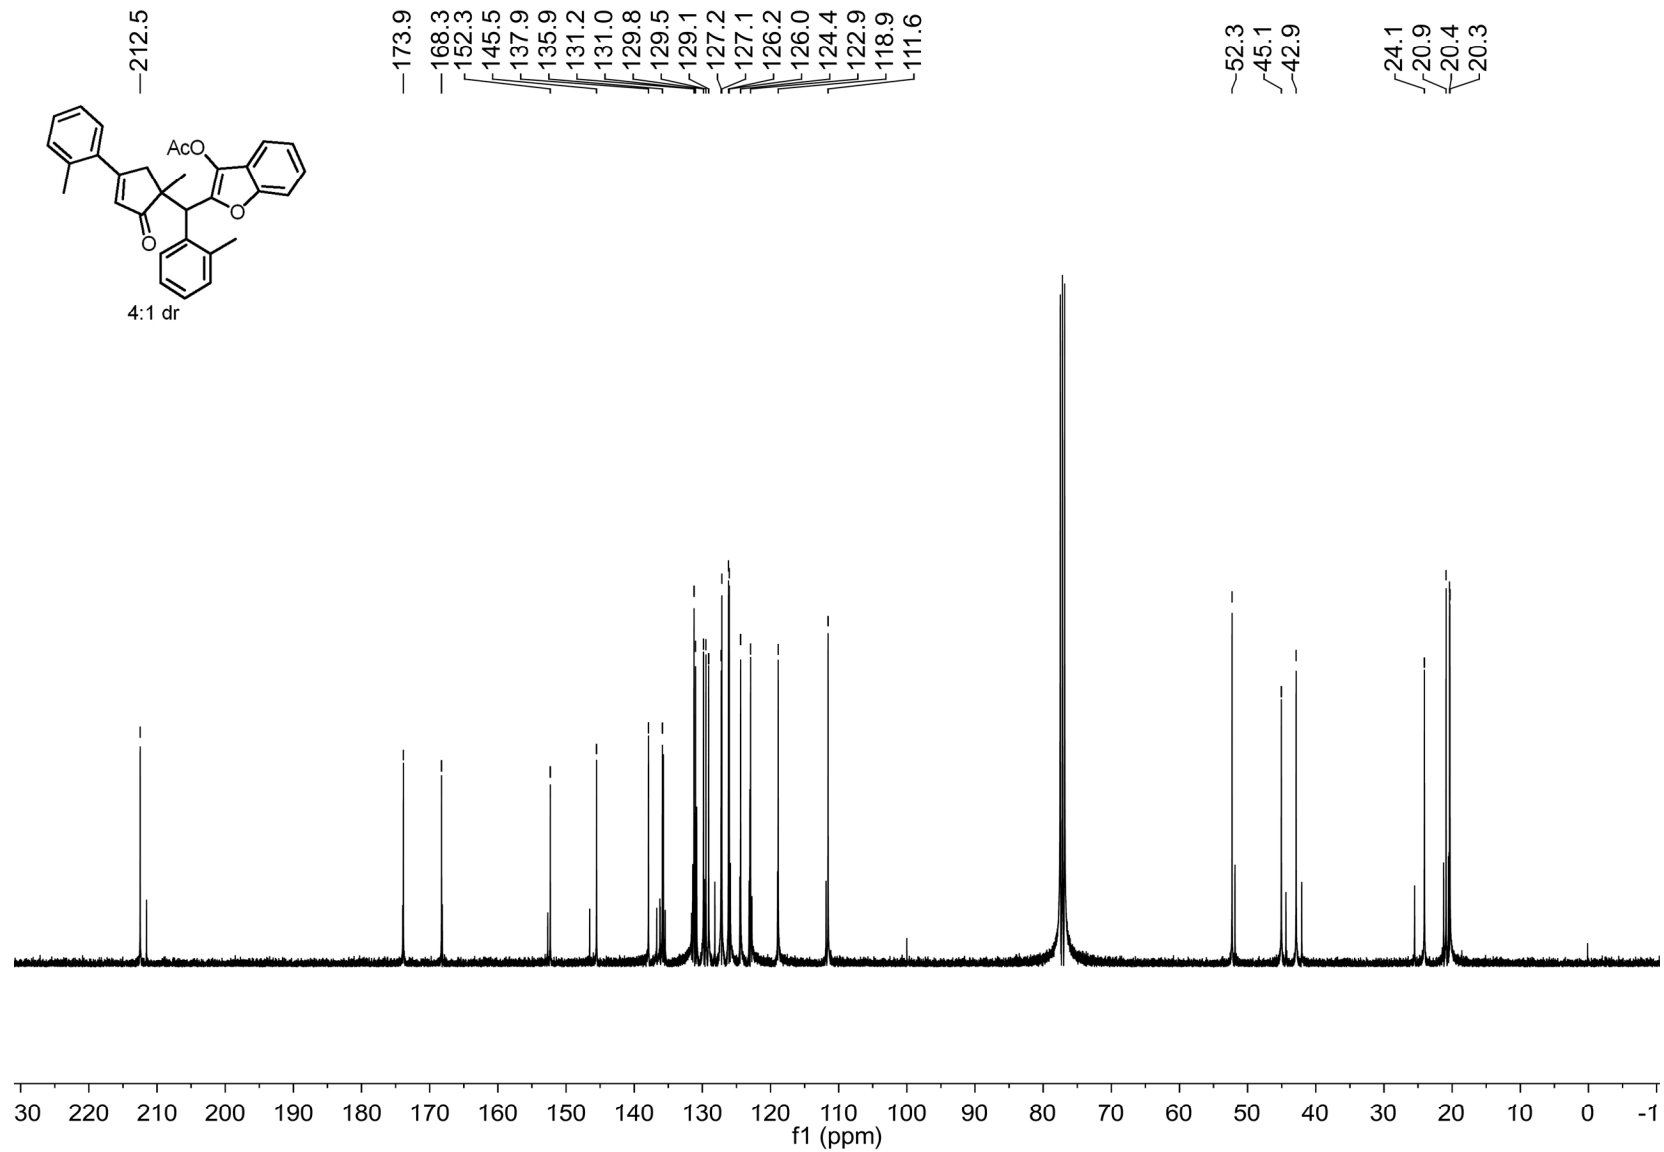

<sup>13</sup>C NMR Spectrum of Compound 3r

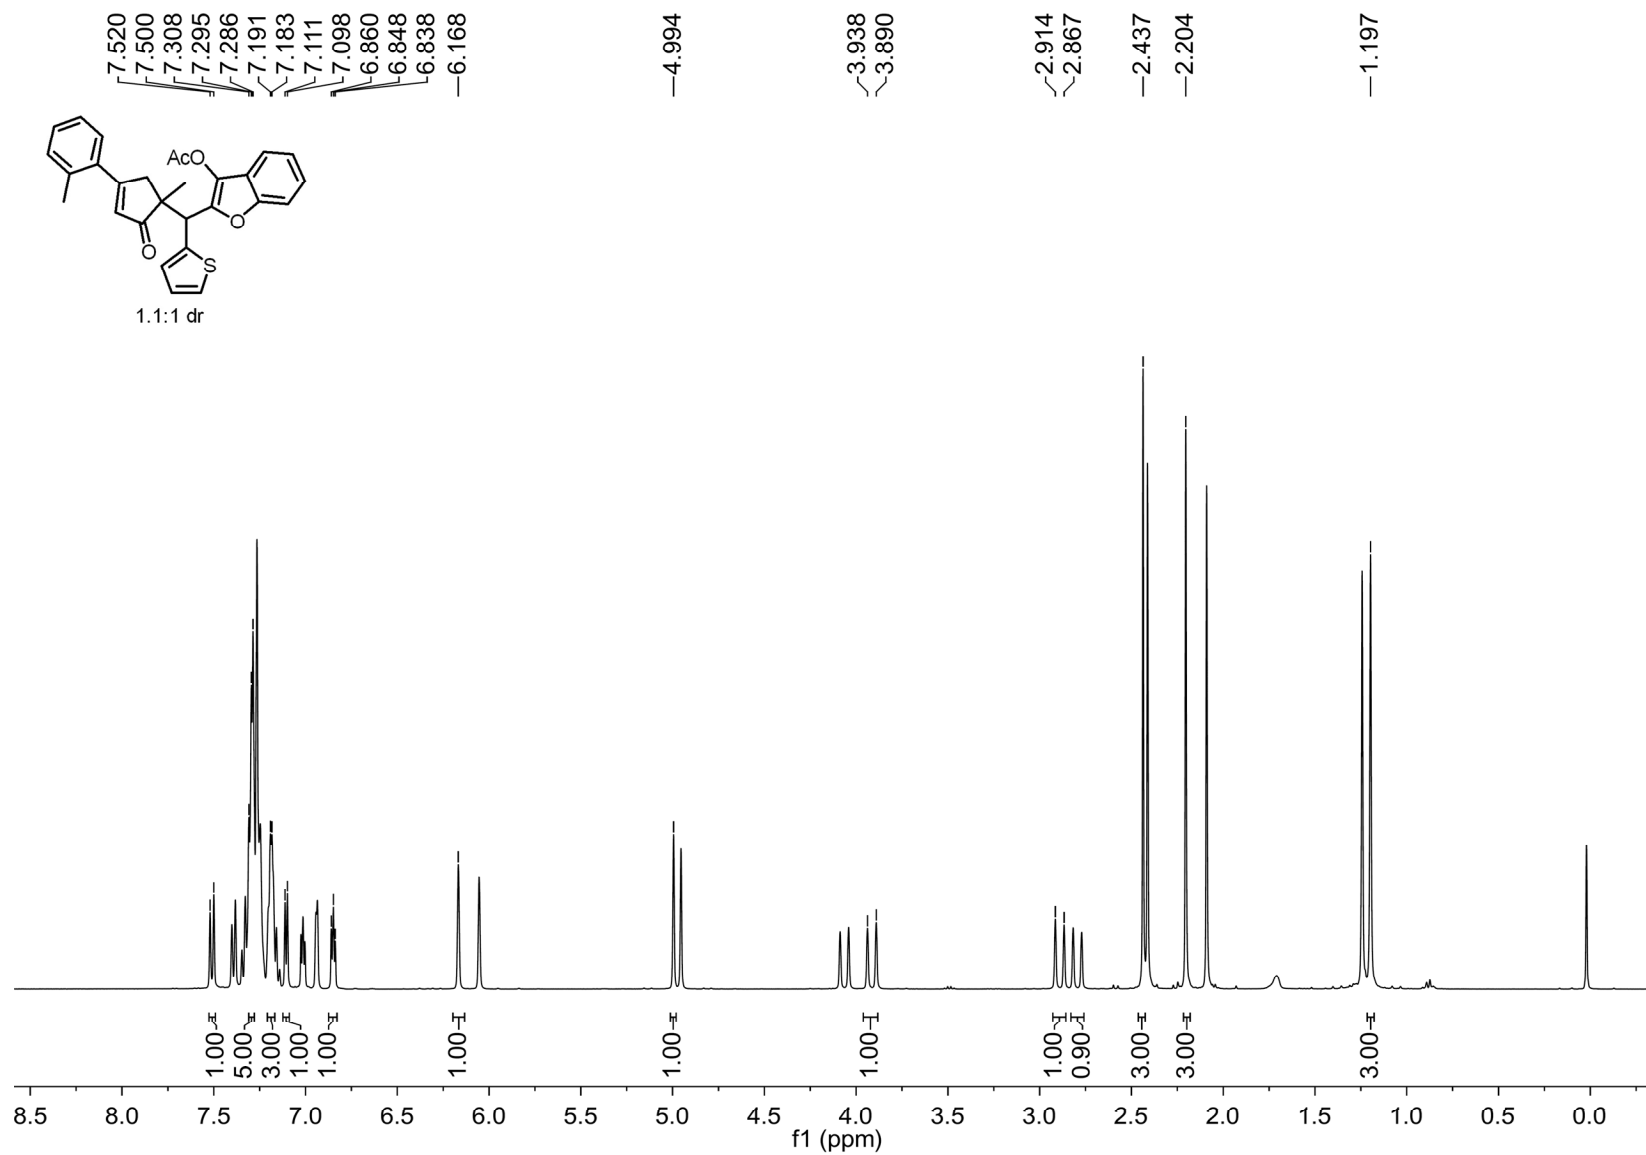

<sup>1</sup>H NMR Spectrum of Compound 3s

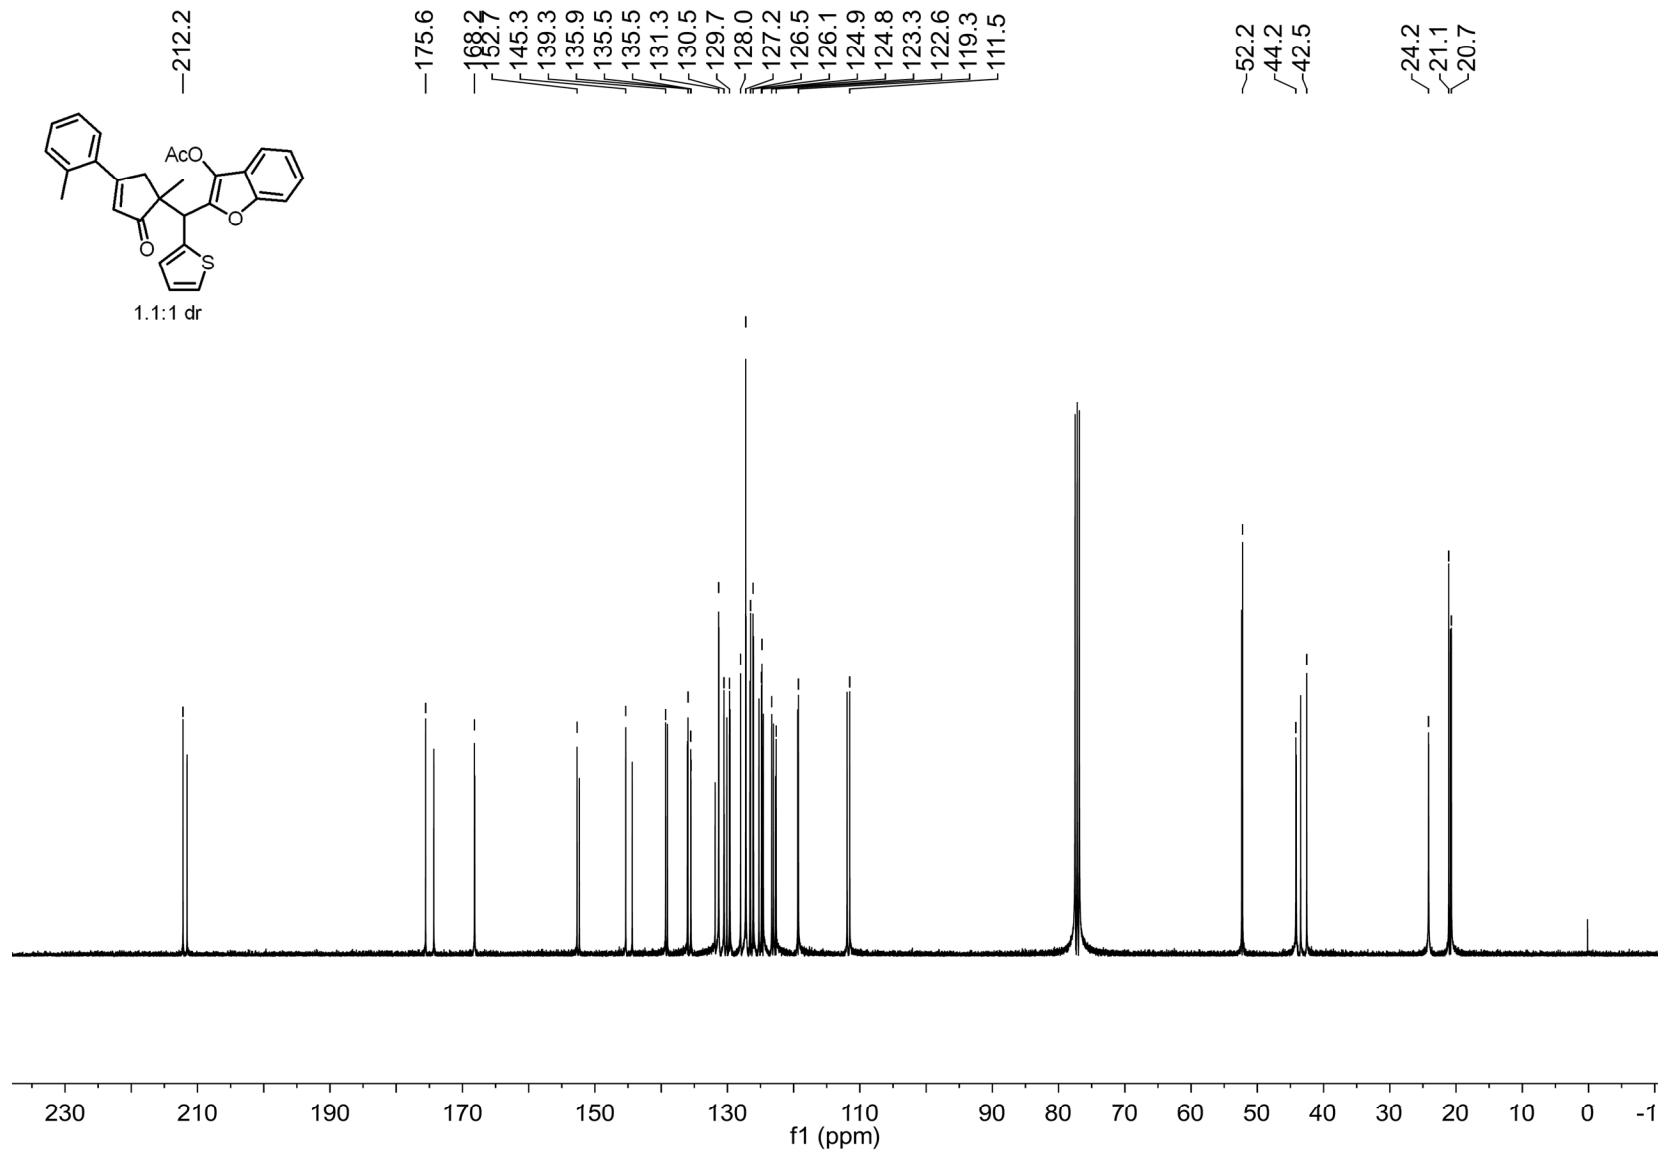

<sup>13</sup>C NMR Spectrum of Compound 3s

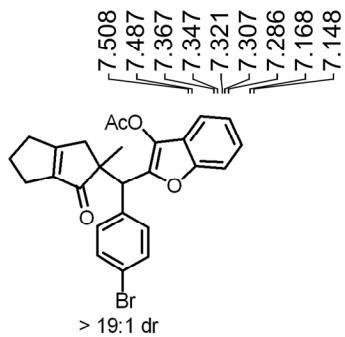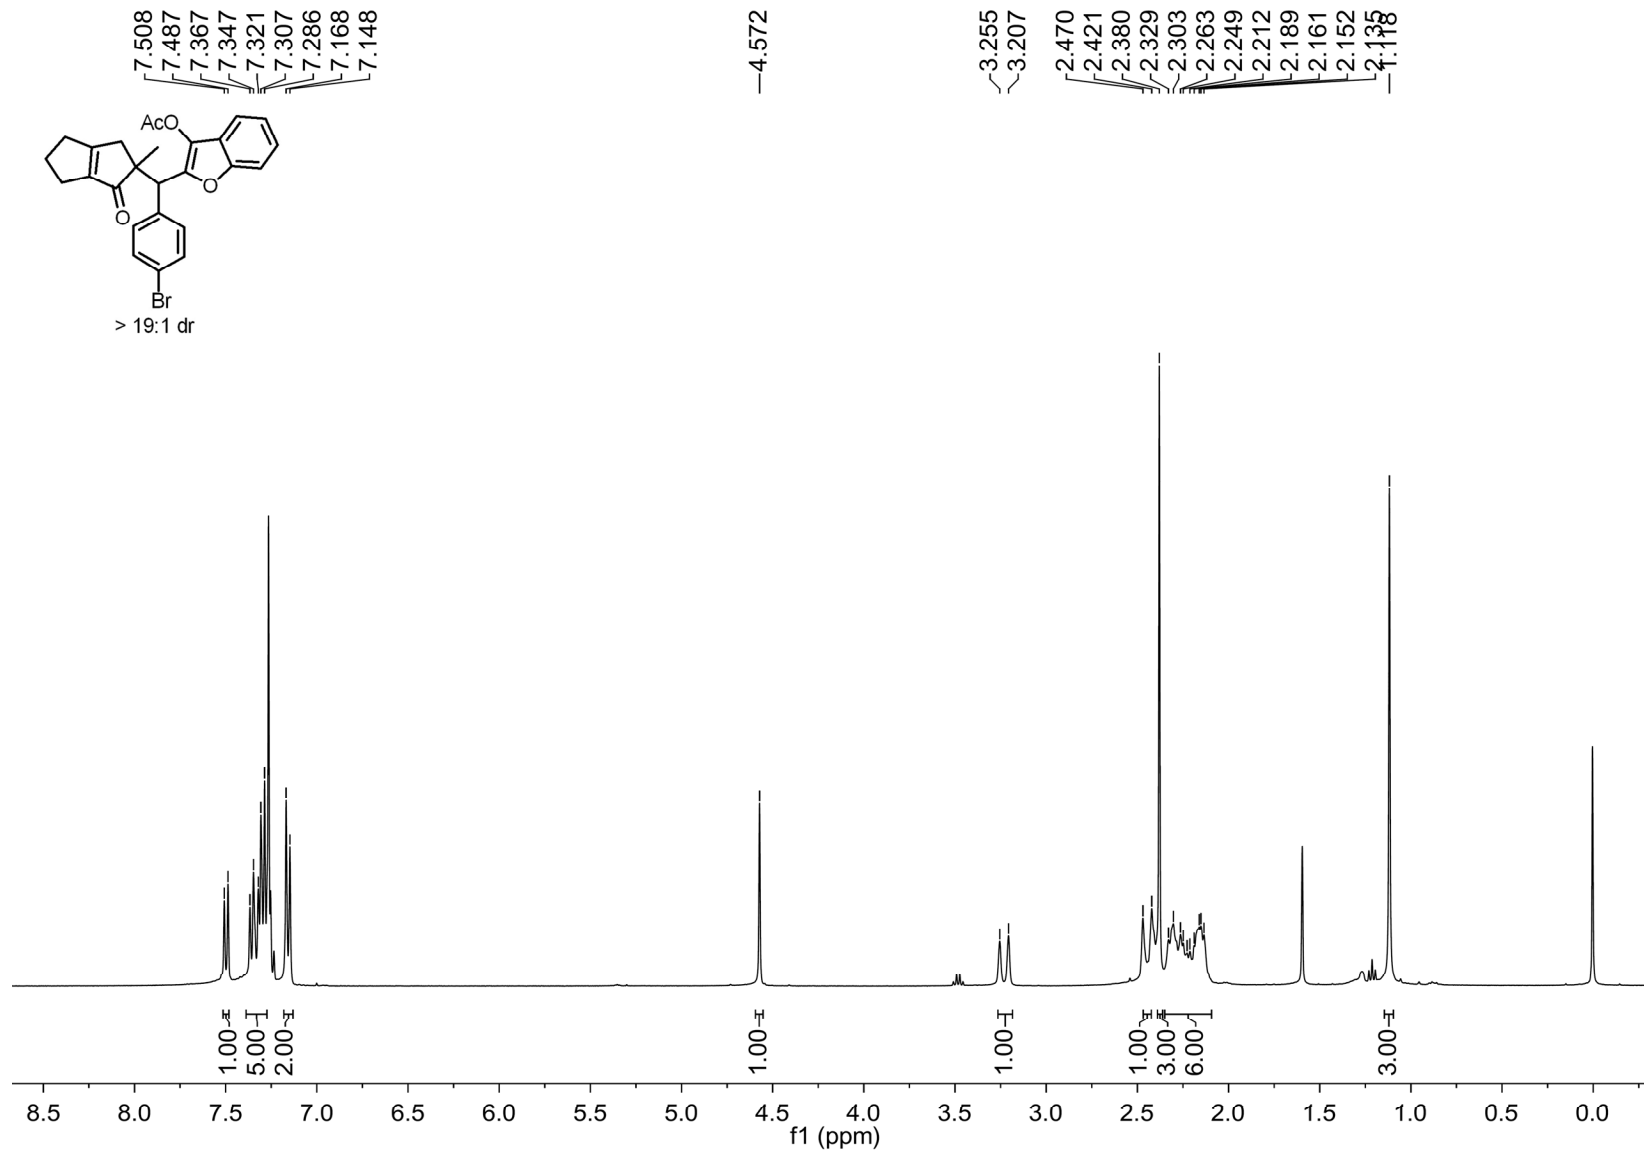

**<sup>1</sup>H NMR Spectrum of Compound 3t**

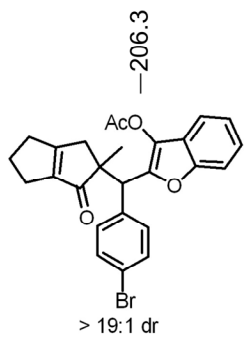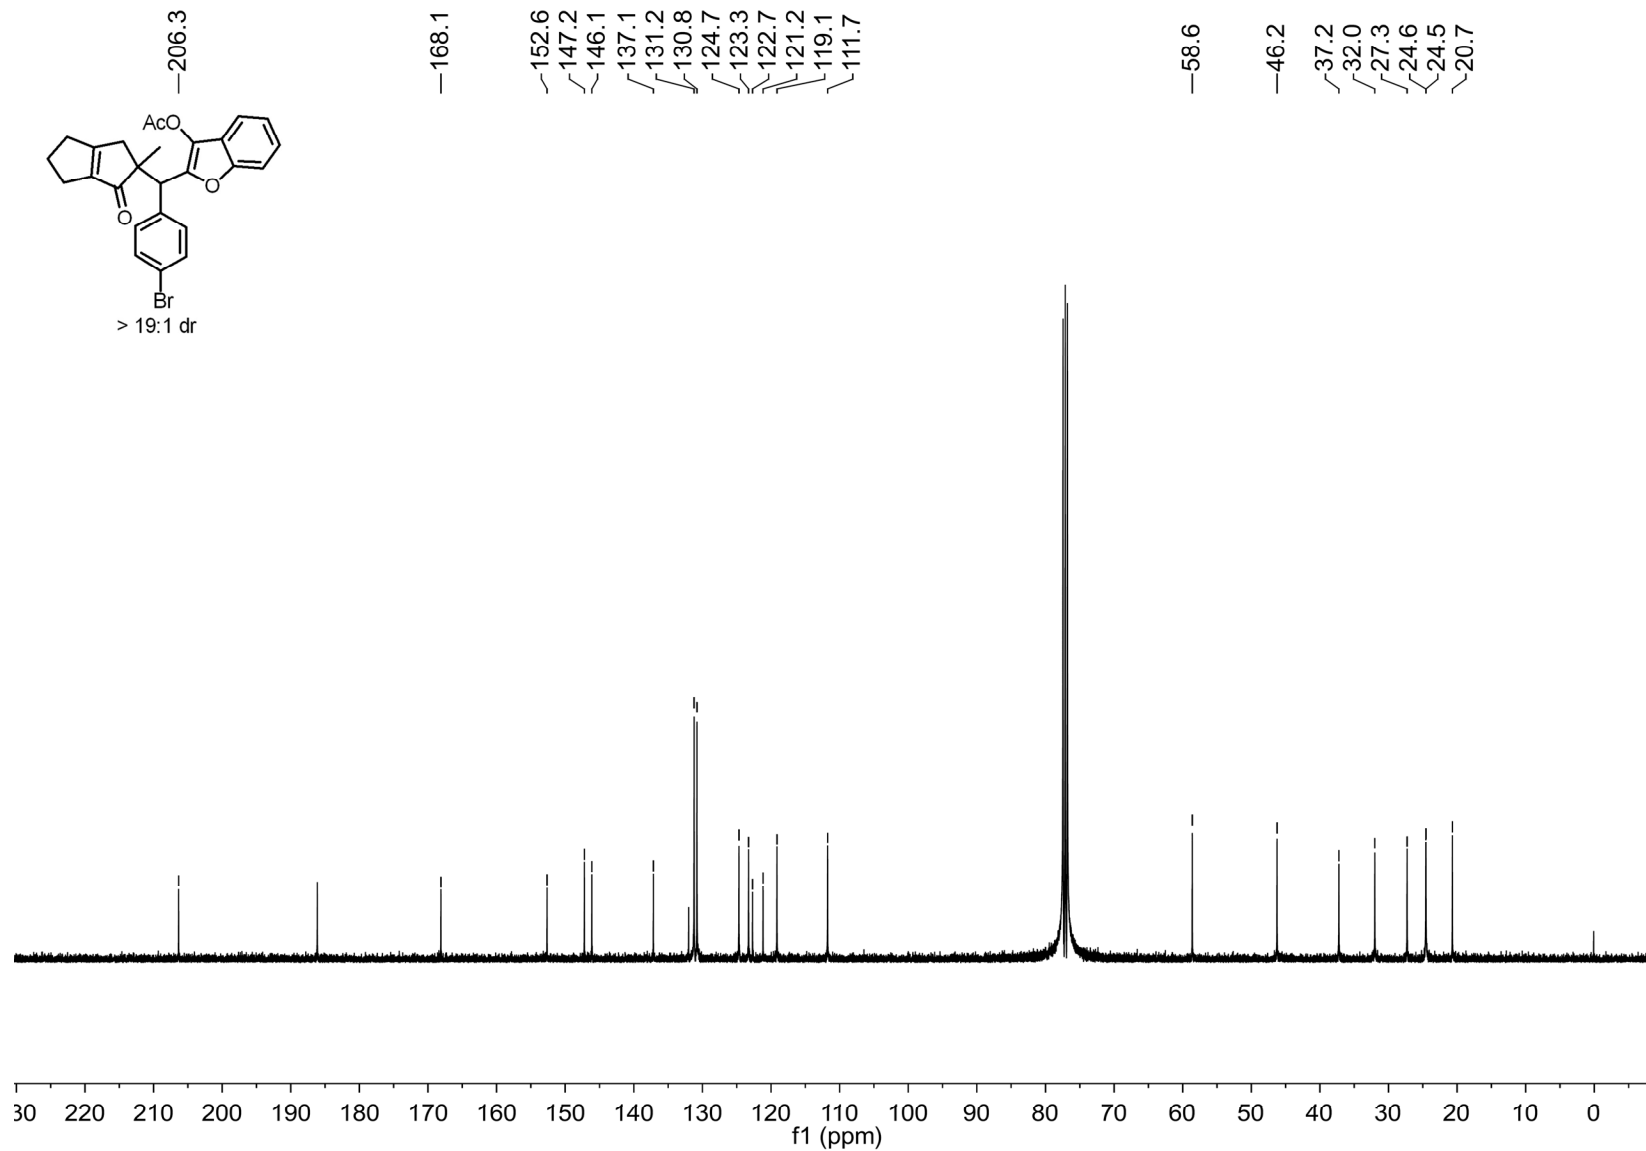

**<sup>13</sup>C NMR Spectrum of Compound 3t**

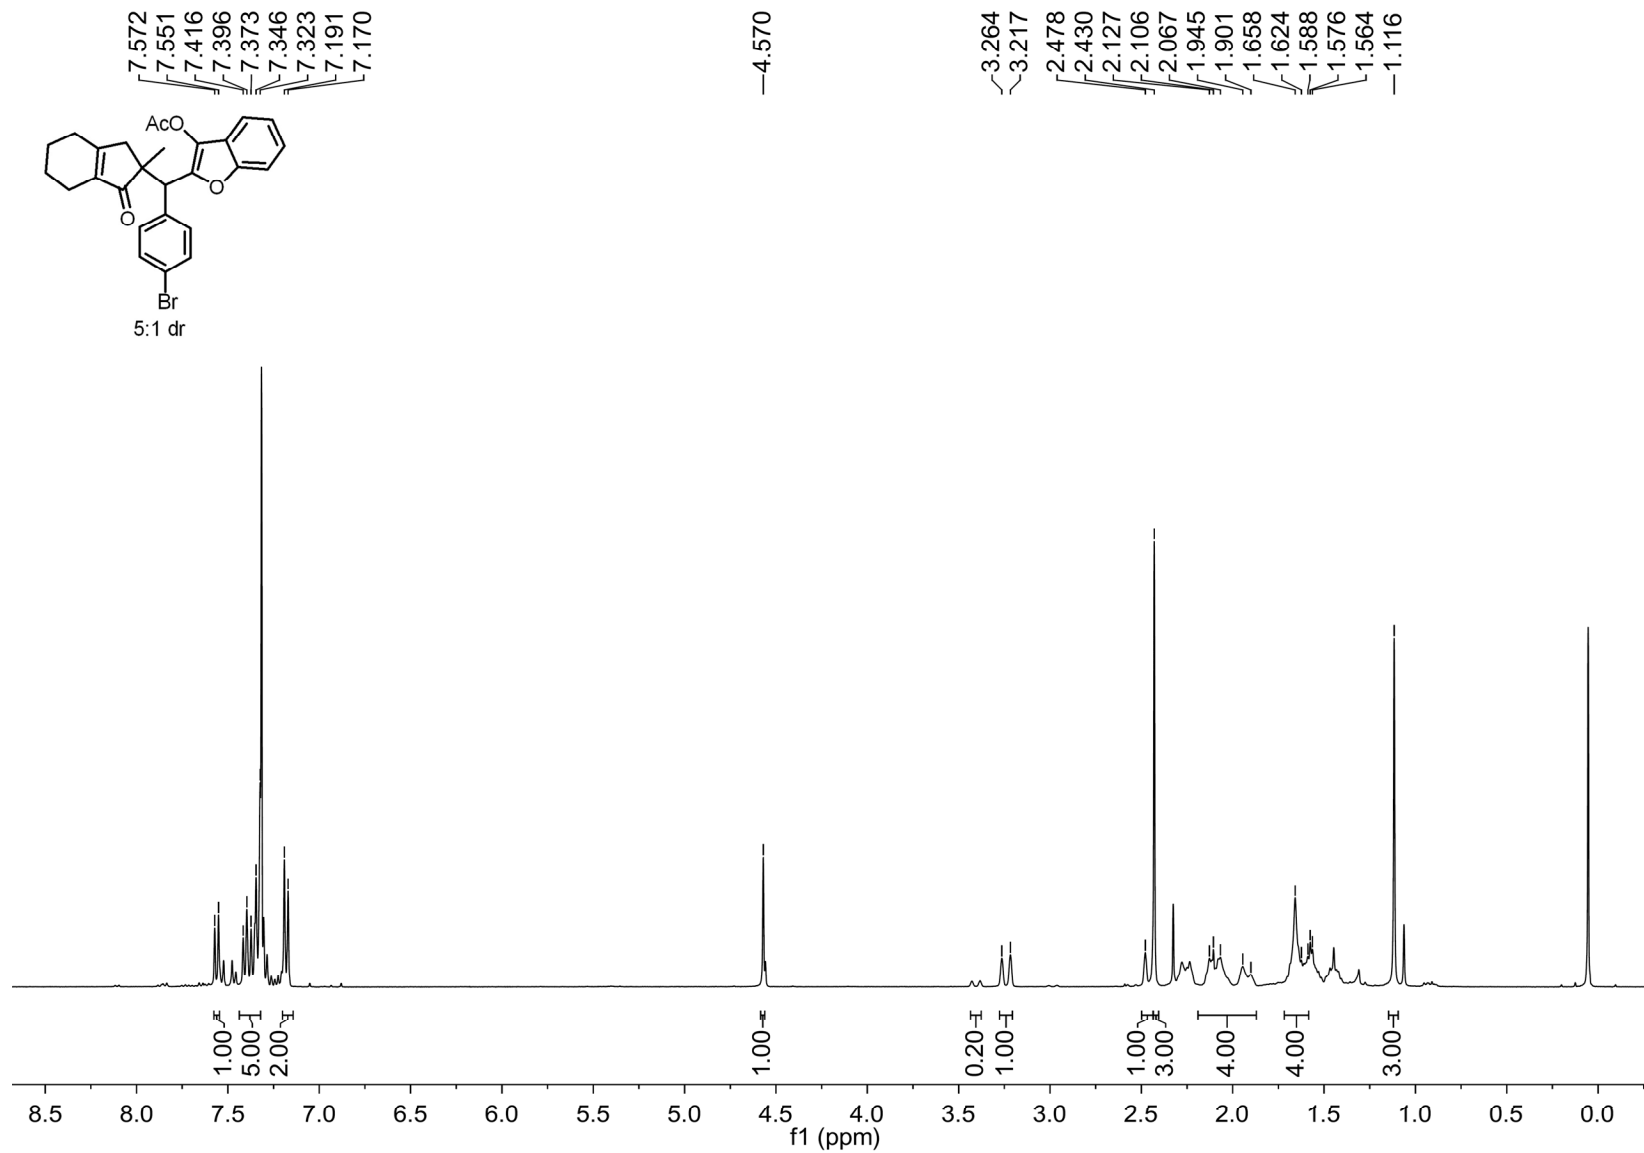

$^1\text{H}$  NMR Spectrum of Compound 3u

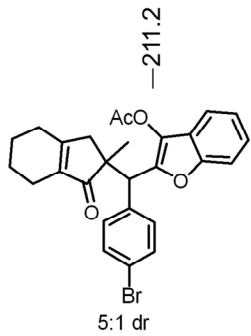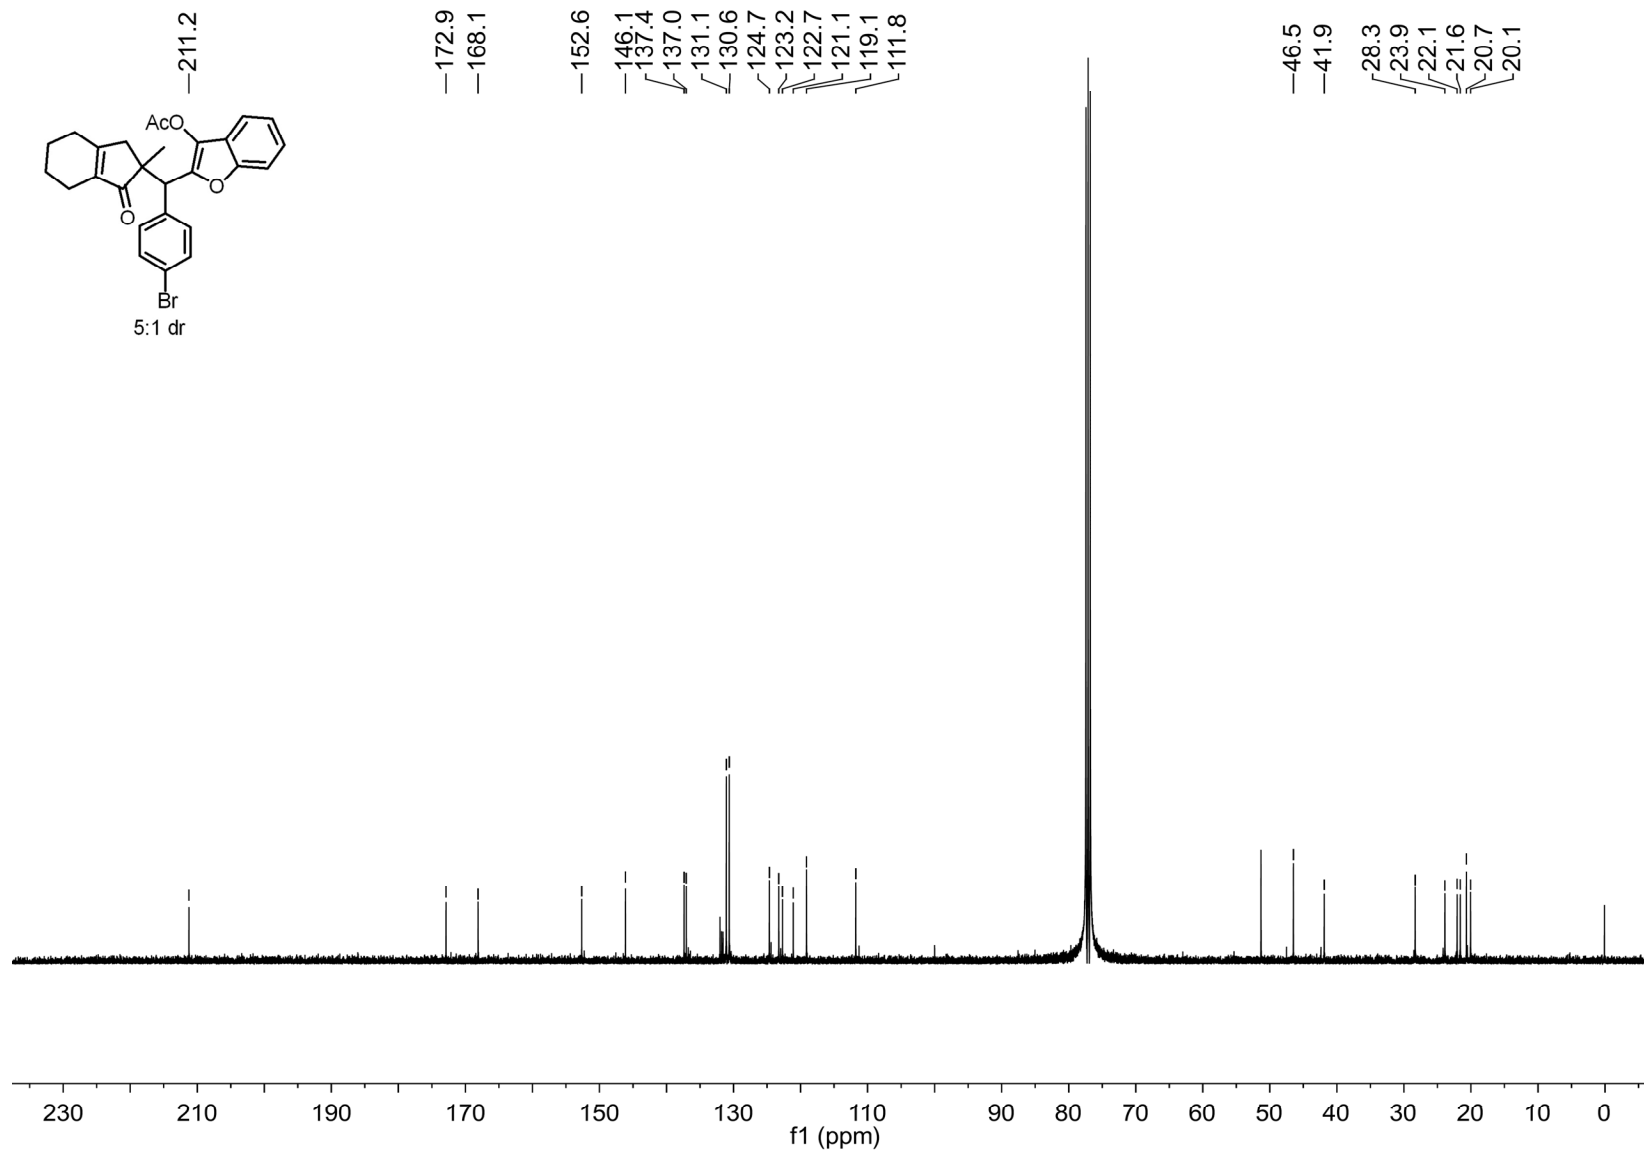

<sup>13</sup>C NMR Spectrum of Compound 3u



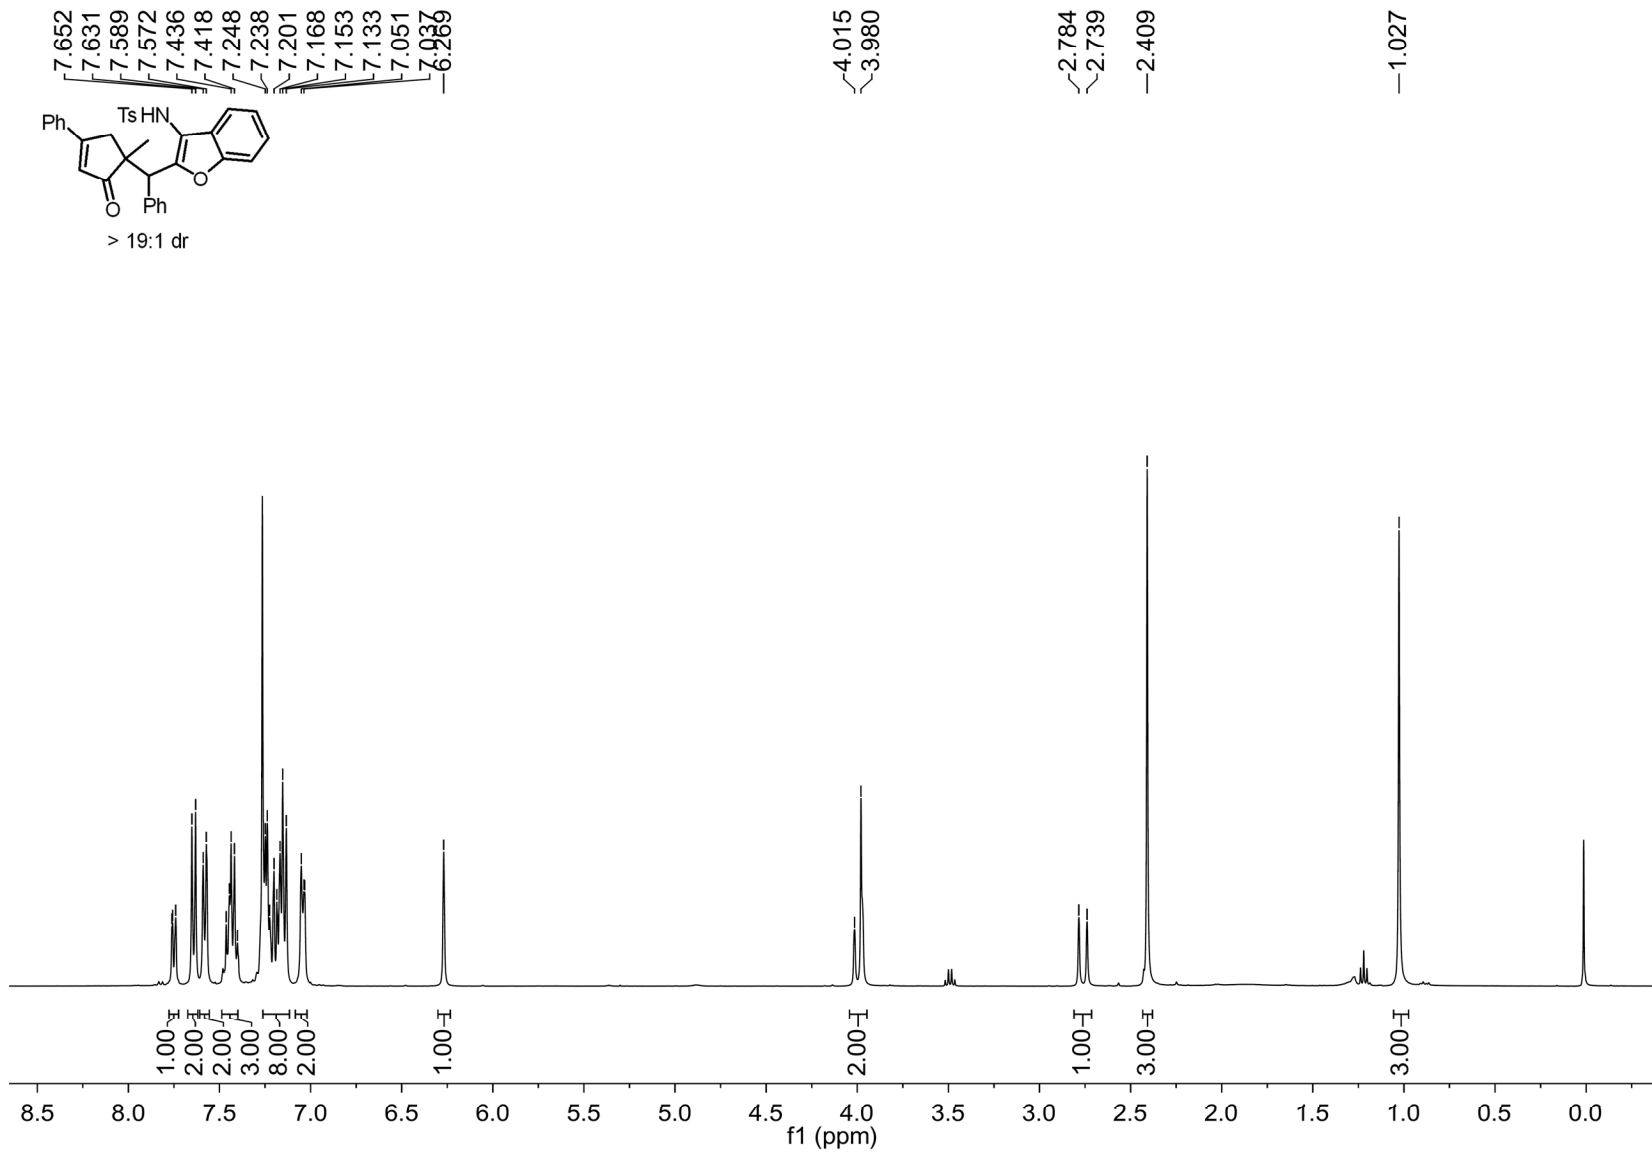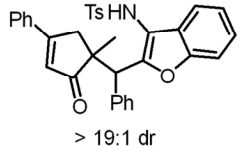

**<sup>1</sup>H NMR Spectrum of Compound 5a**

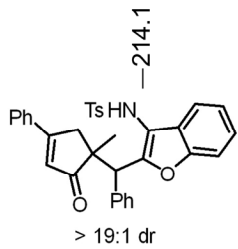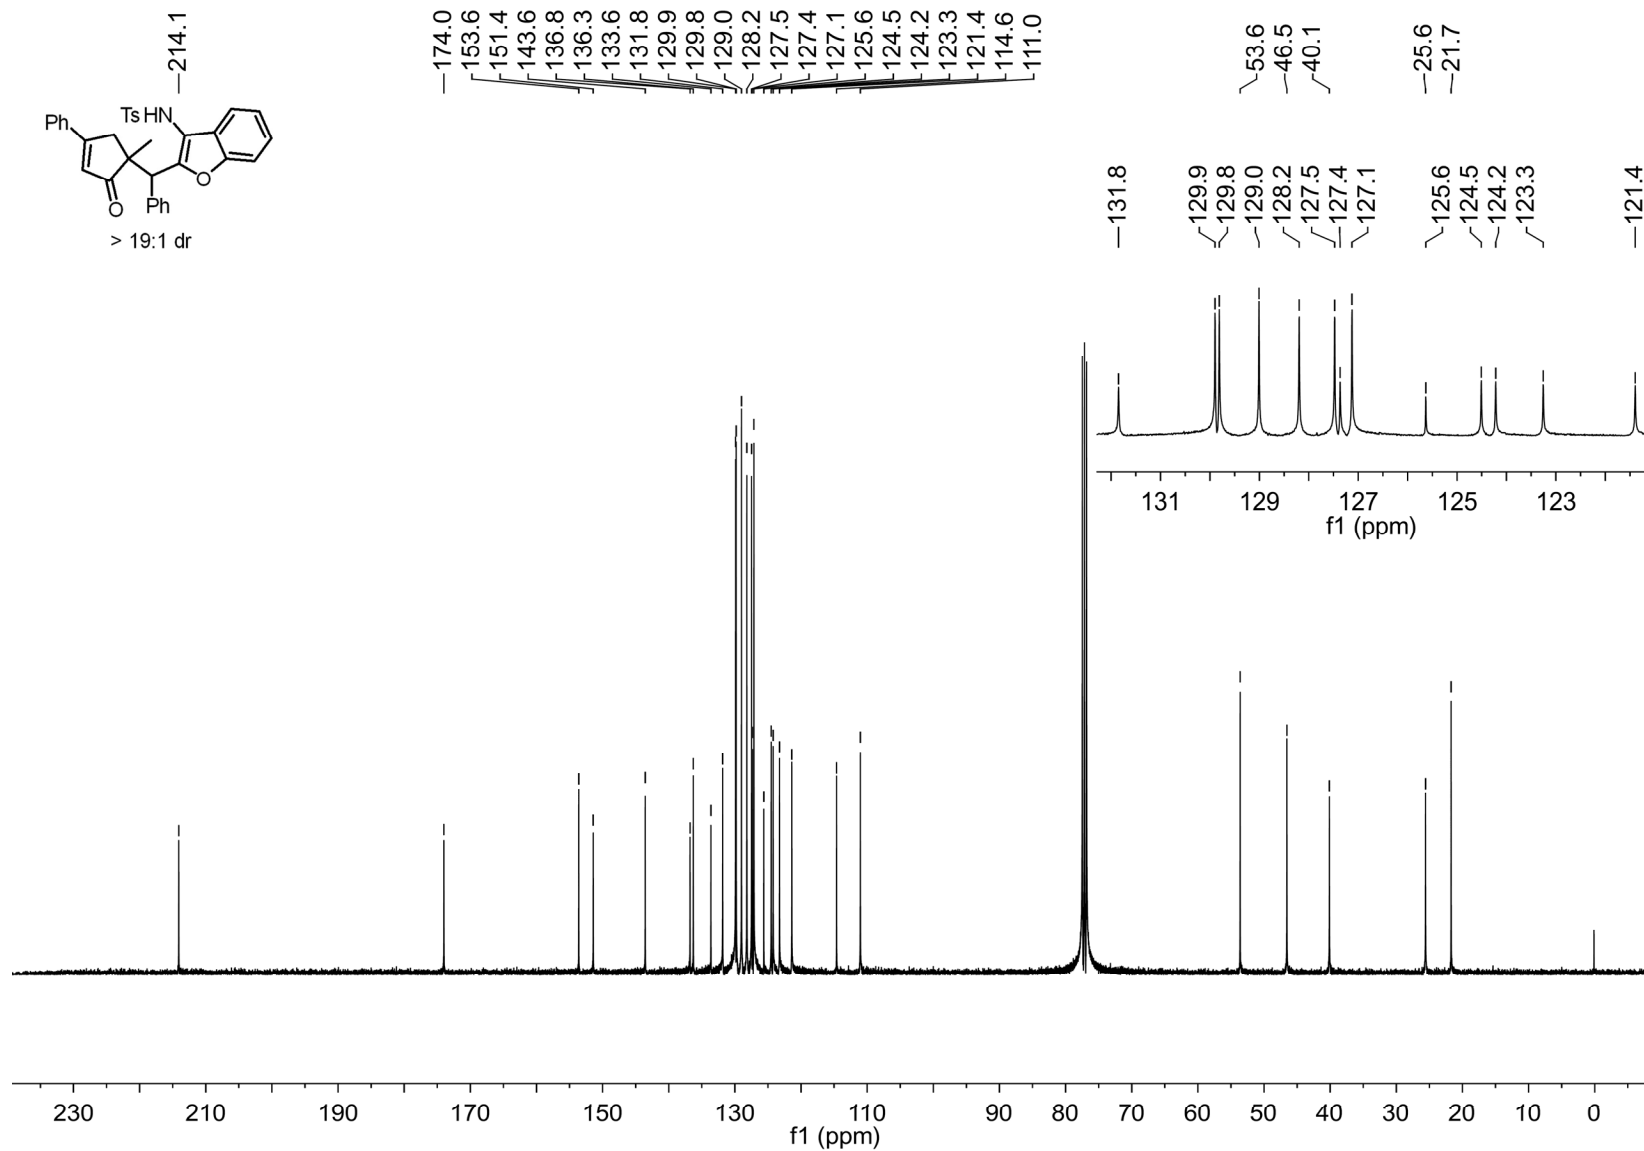

**<sup>13</sup>C NMR Spectrum of Compound 5a**

7.659  
7.639  
7.492  
7.472  
7.286  
7.246  
7.232  
7.210  
7.185  
7.164  
7.158  
7.138  
7.043  
7.028  
6.924  
6.926

3.986  
3.973  
3.943

2.772  
2.727  
2.413  
2.391

1.017

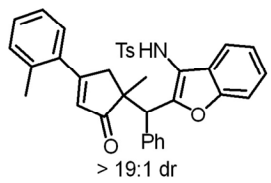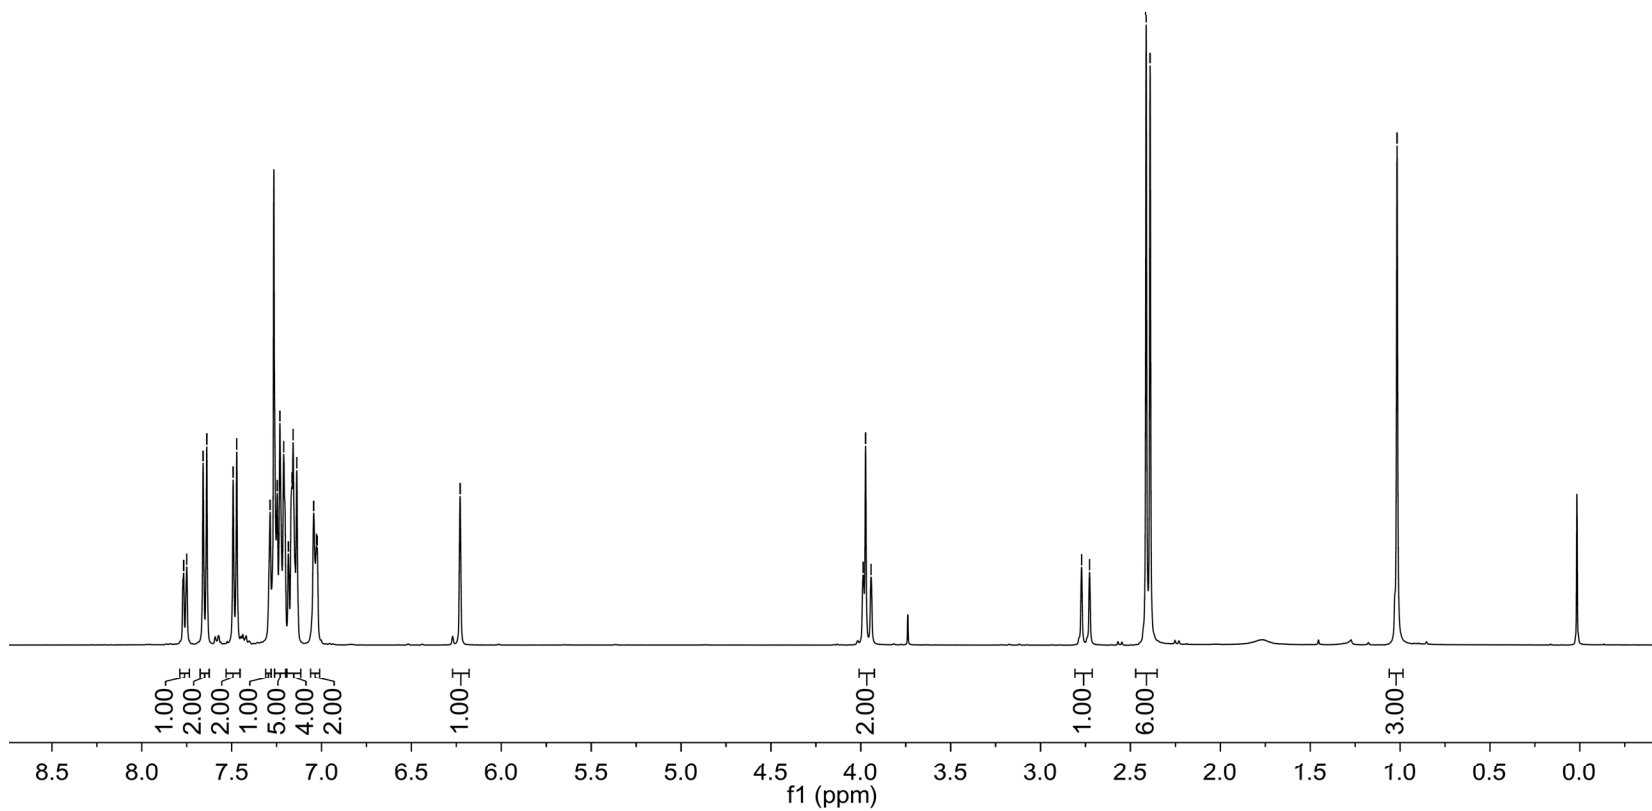

**<sup>1</sup>H NMR Spectrum of Compound 5b**

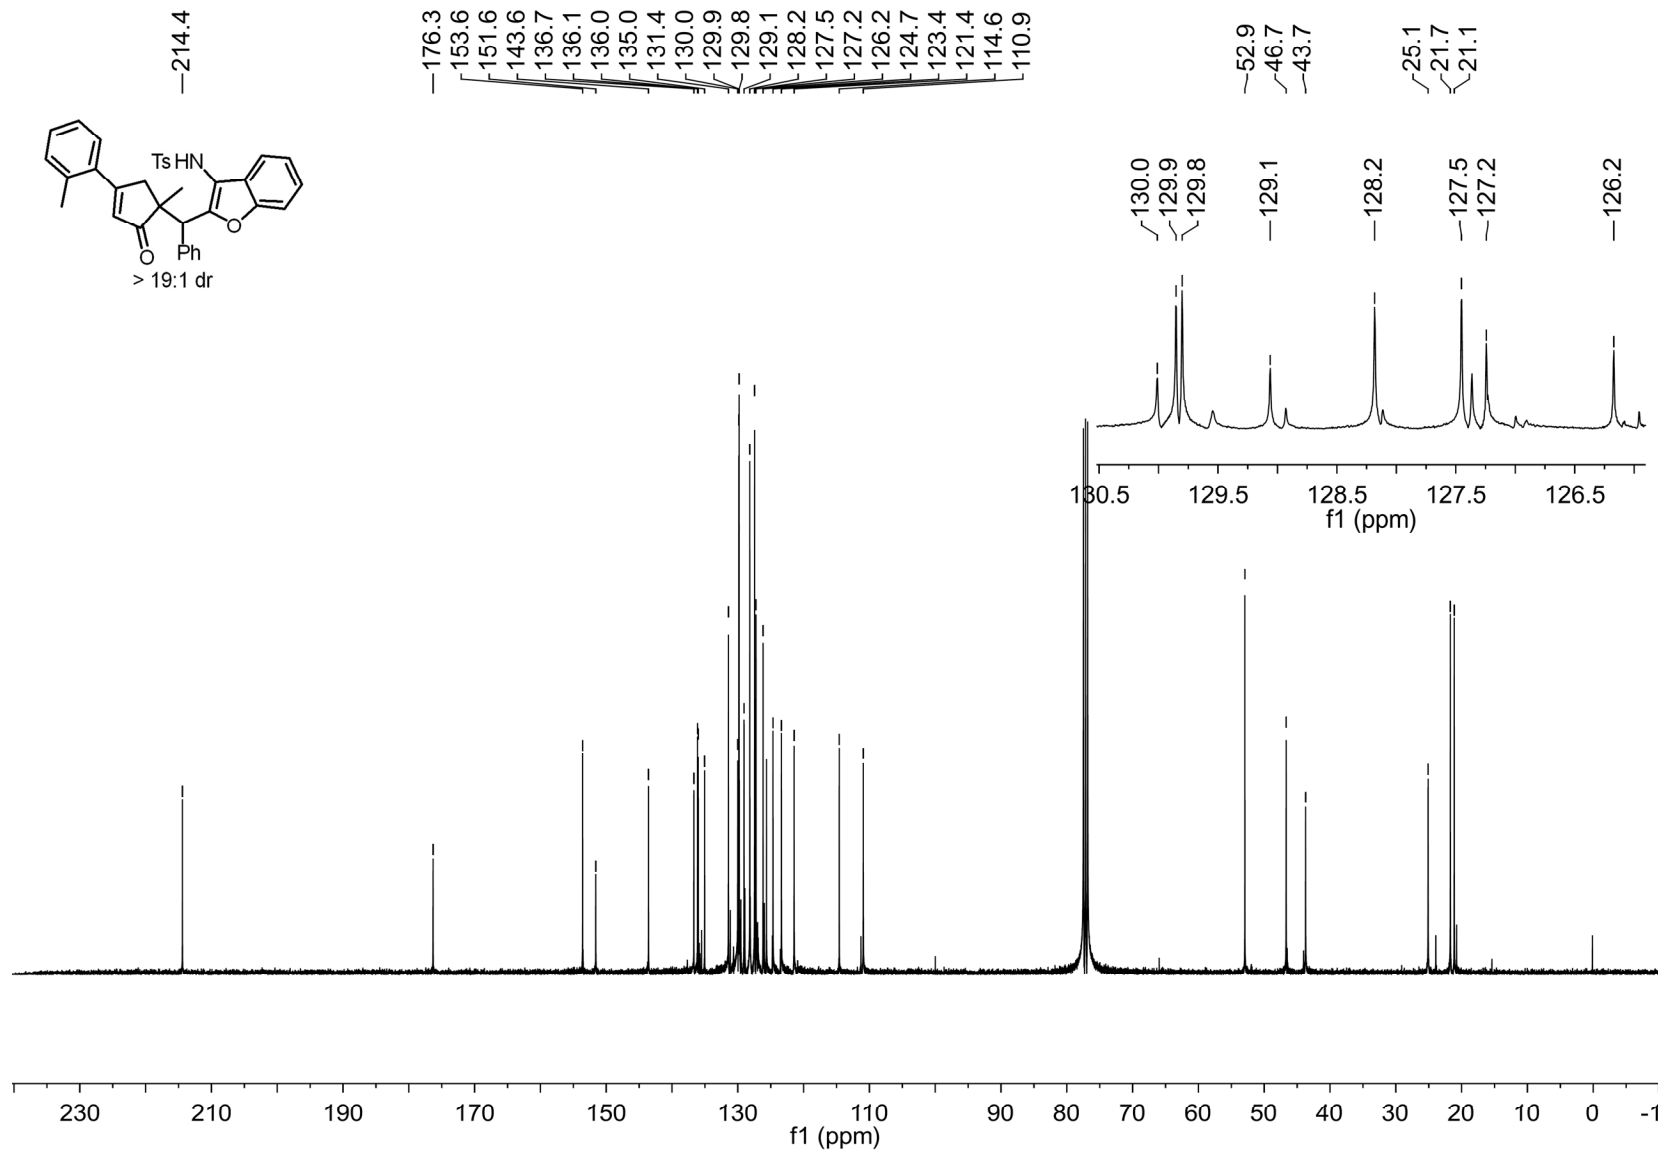

$^{13}\text{C}$  NMR Spectrum of Compound 5b

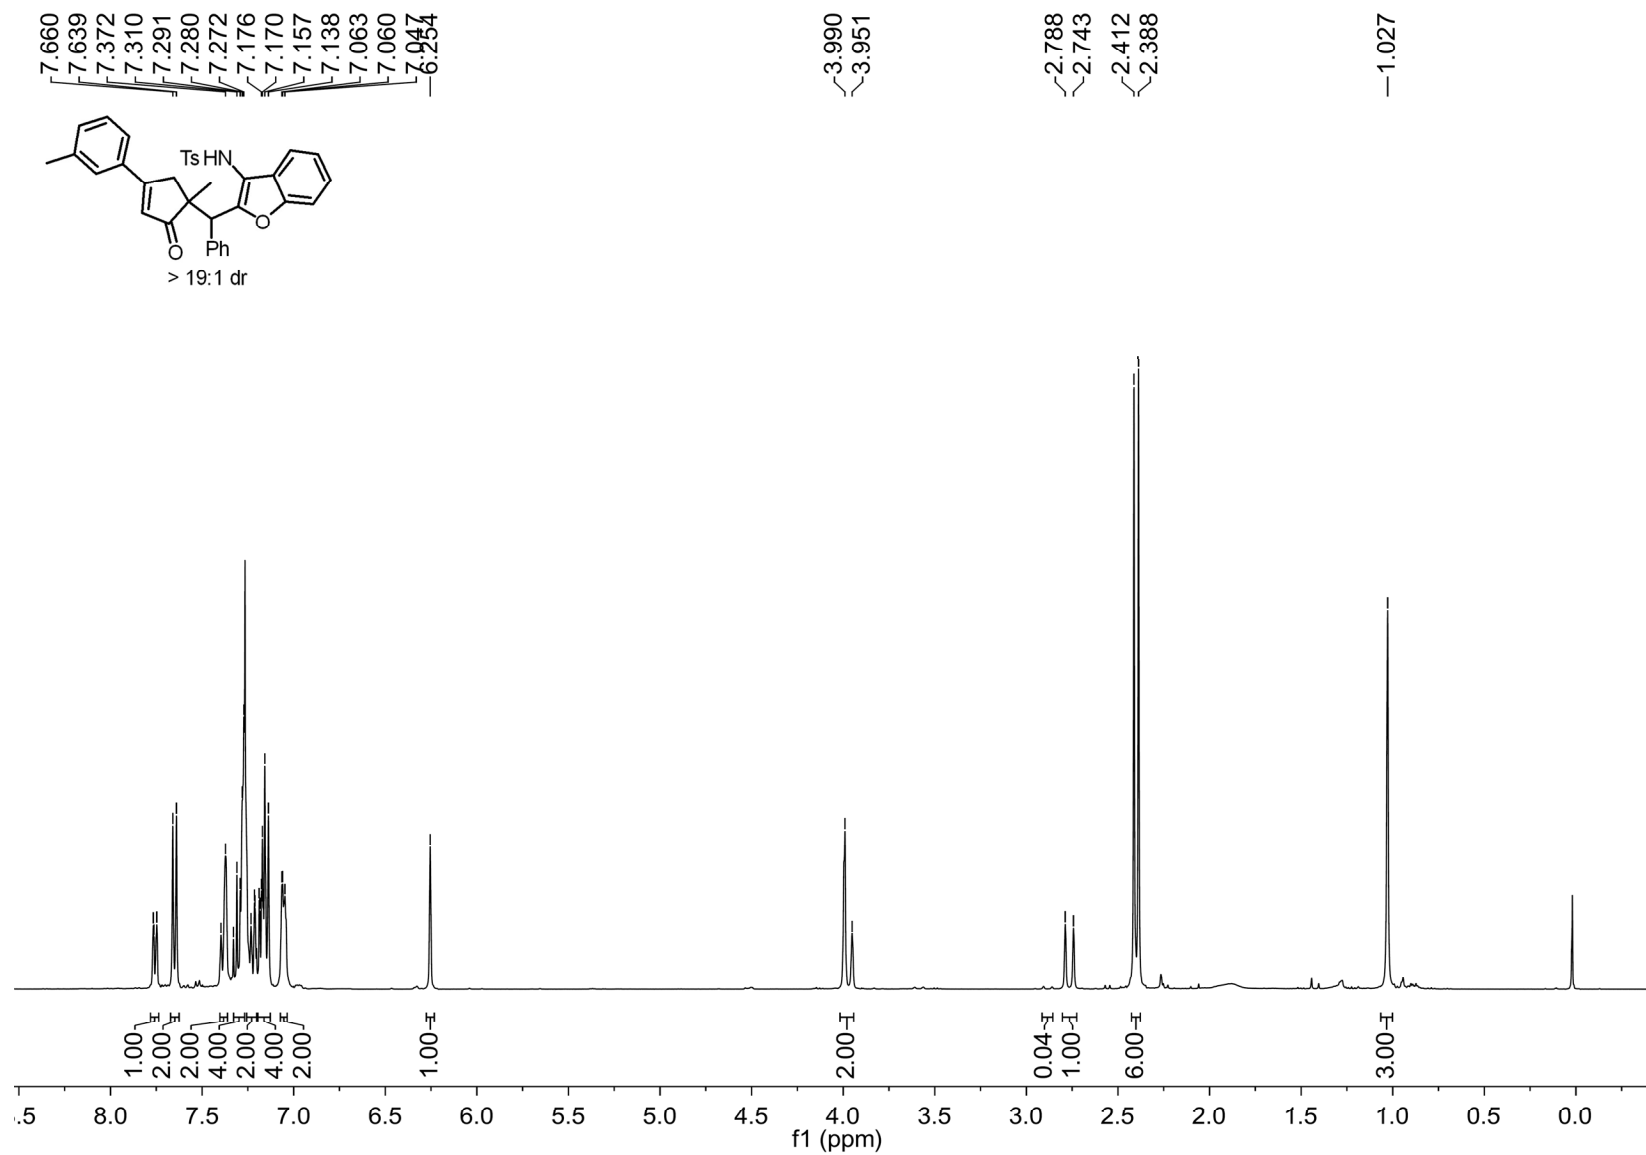

**<sup>1</sup>H NMR Spectrum of Compound 5c**

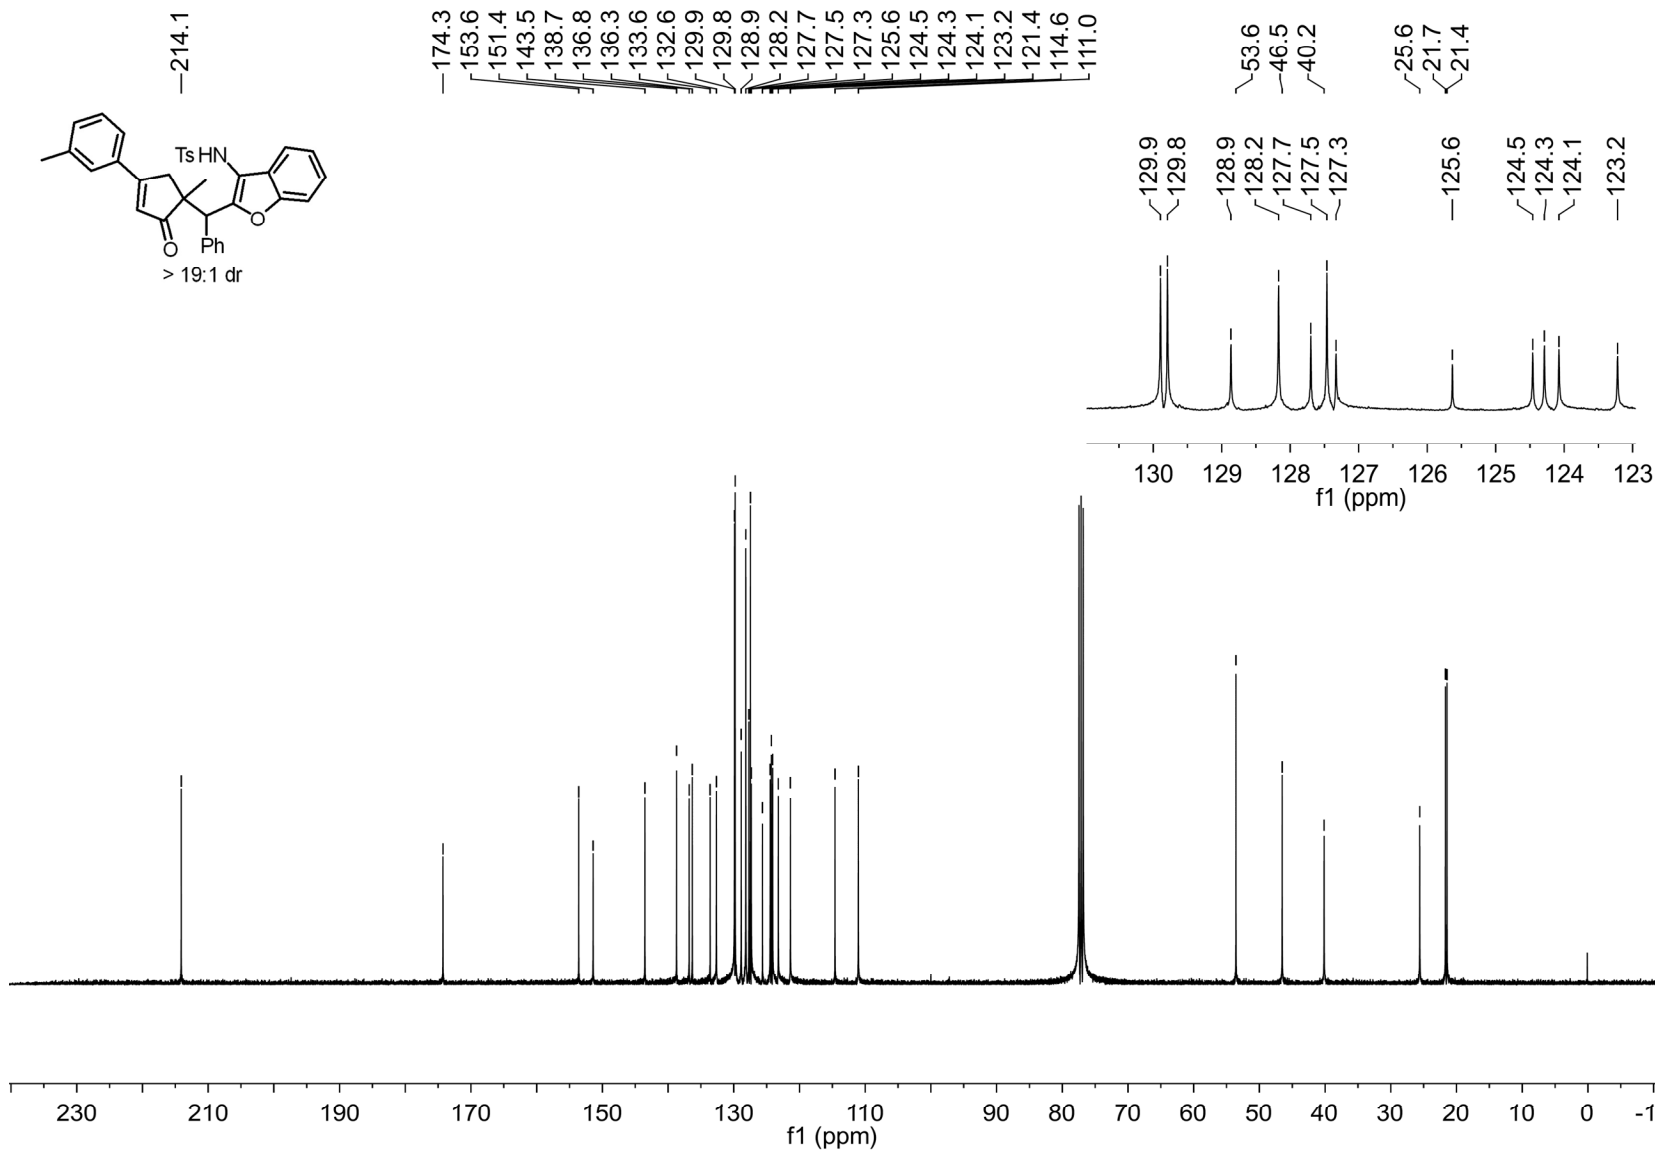

$^{13}\text{C}$  NMR Spectrum of Compound 5c

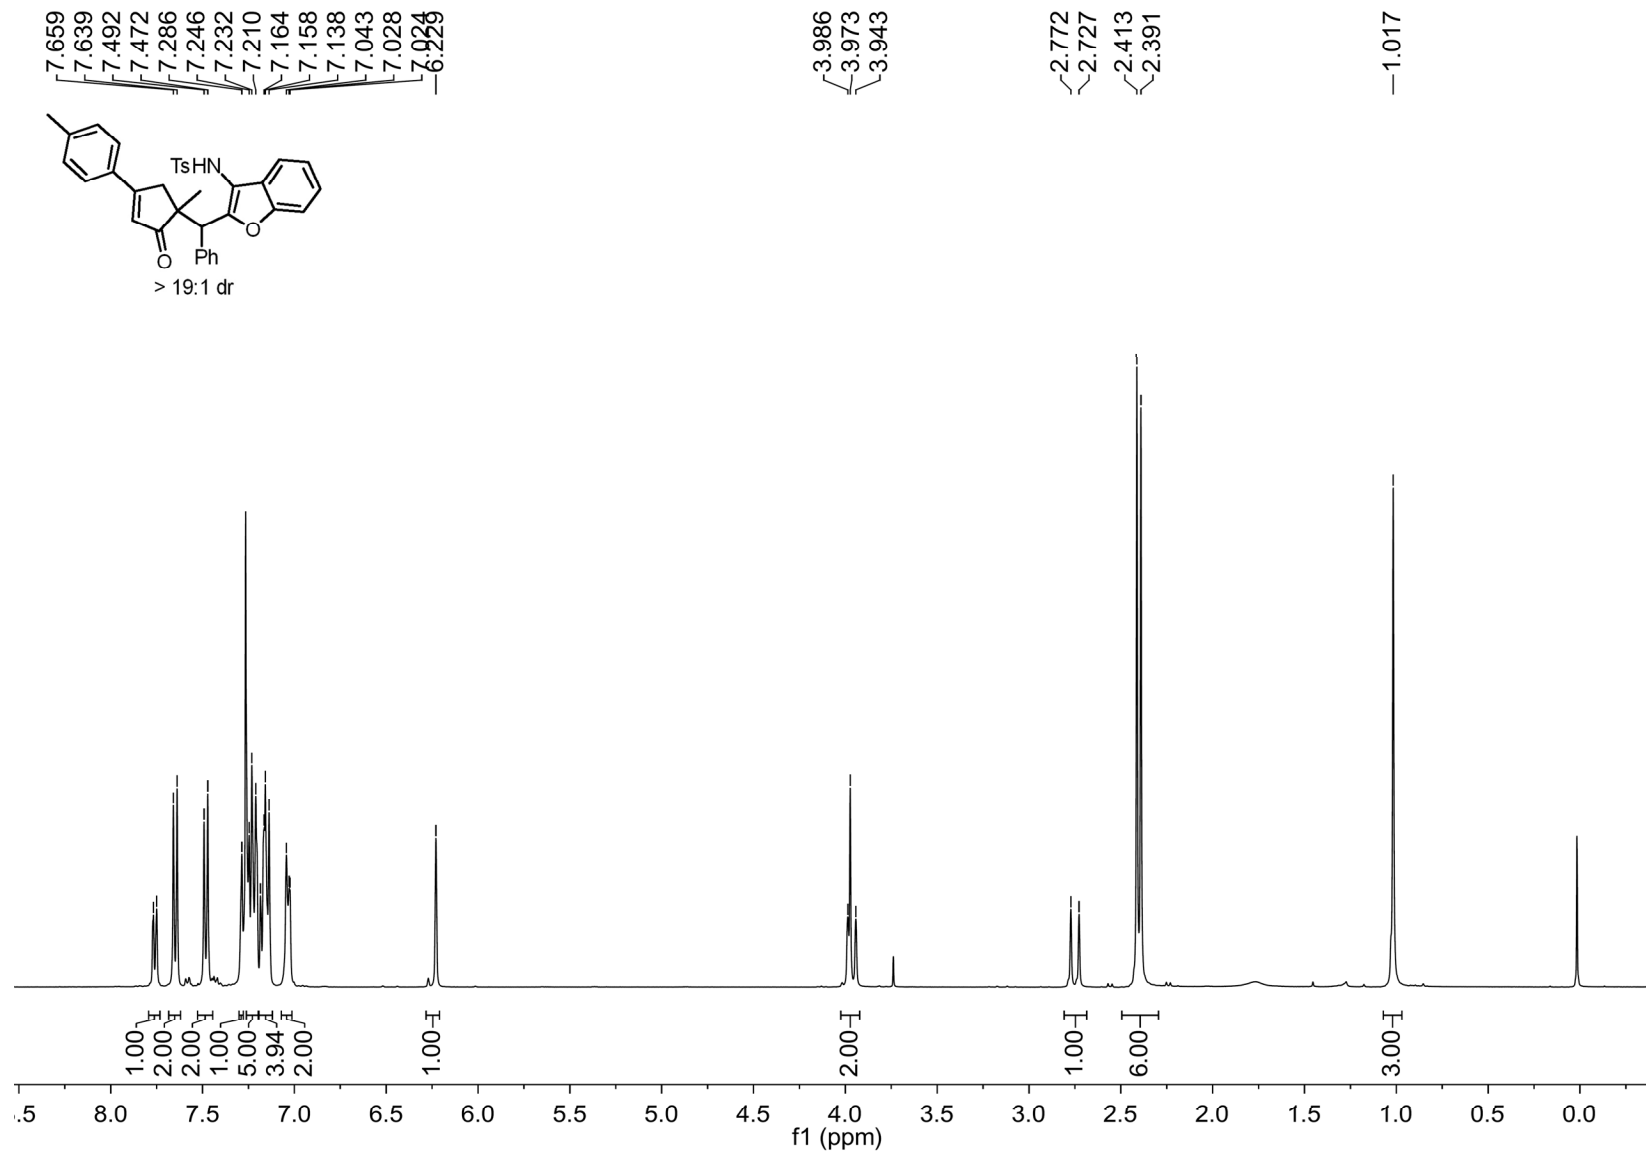

**<sup>1</sup>H NMR Spectrum of Compound 5d**

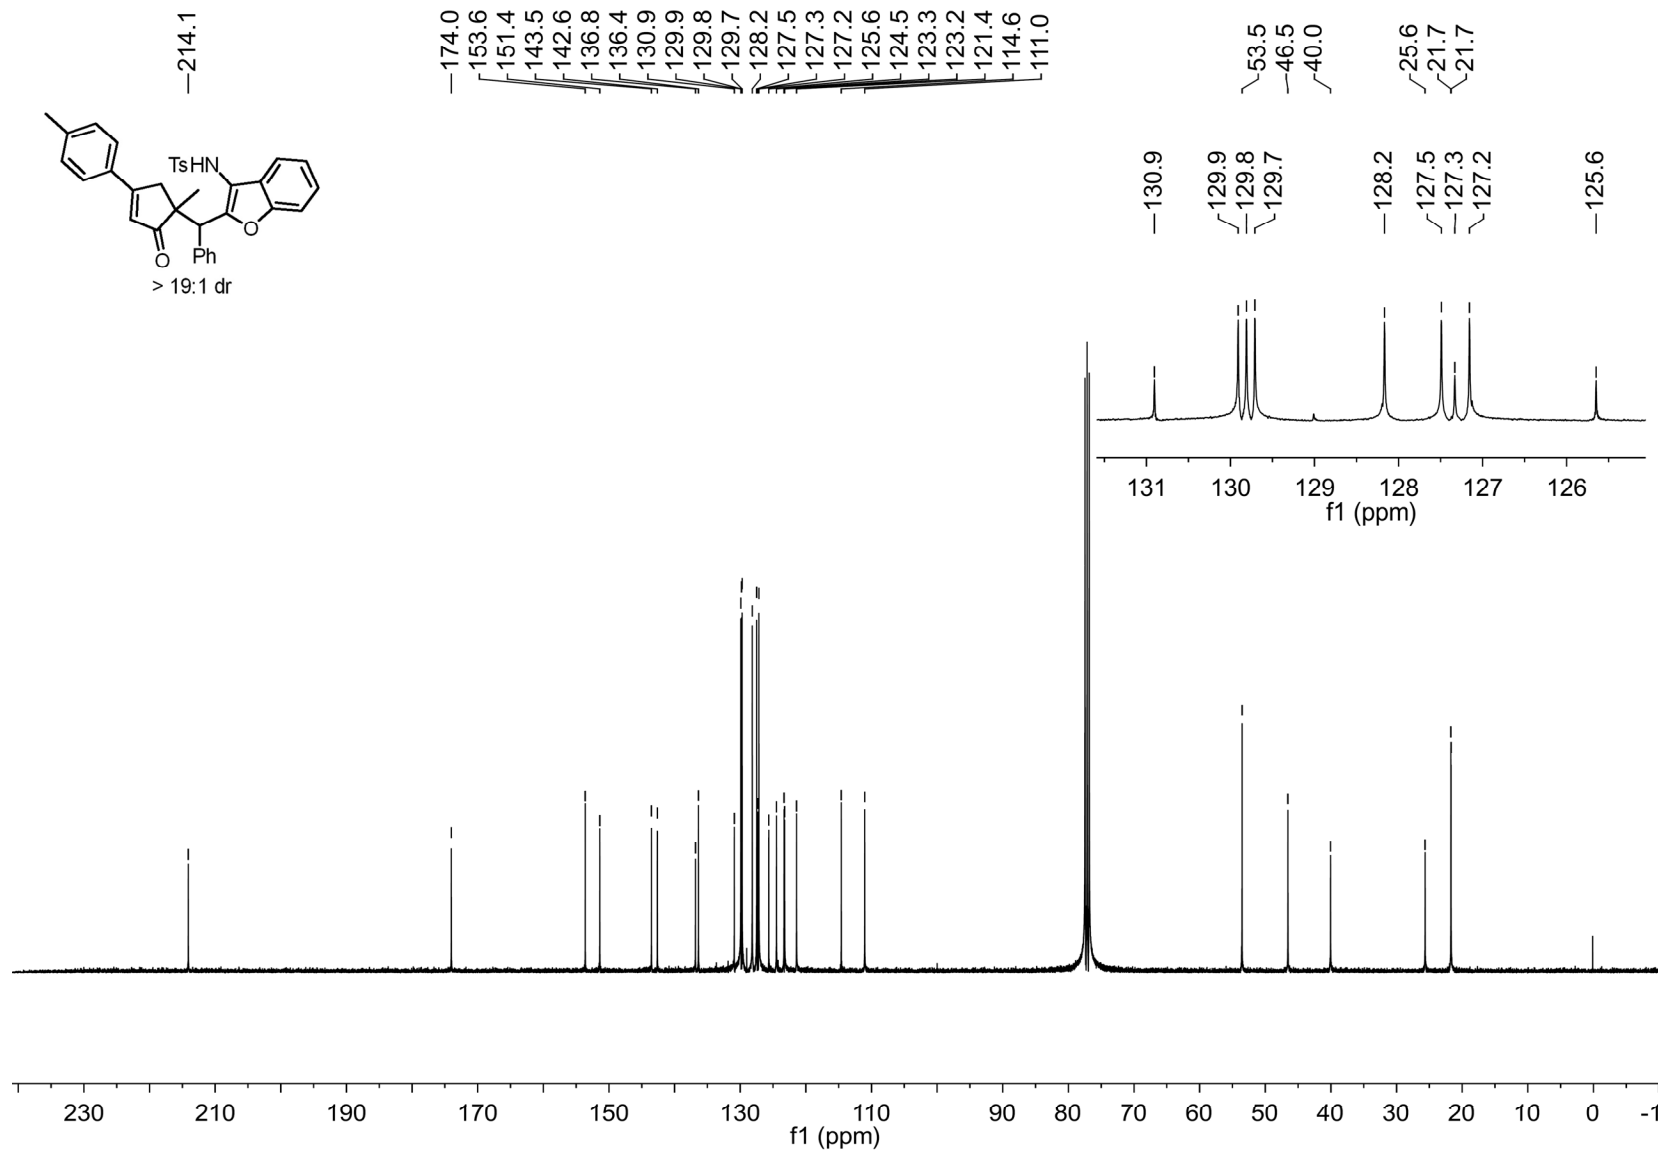

$^{13}\text{C}$  NMR Spectrum of Compound 5d



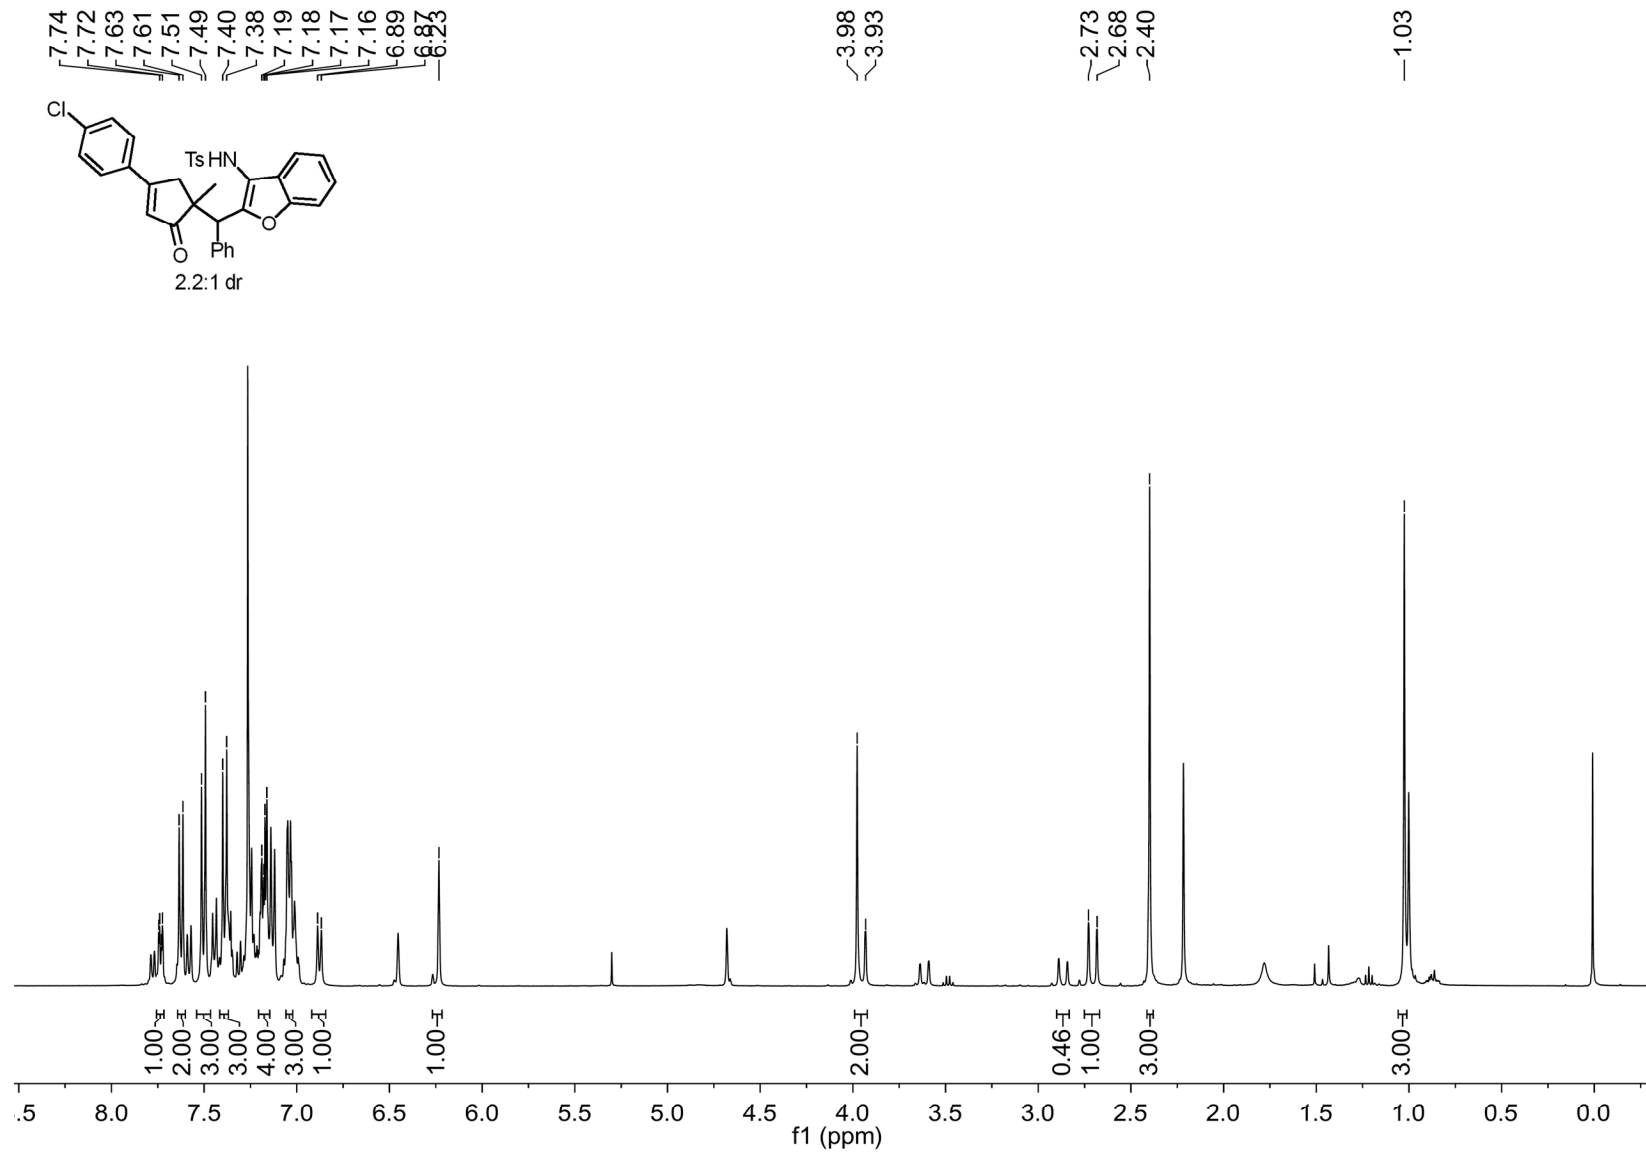

$^1\text{H}$  NMR Spectrum of Compound 5e

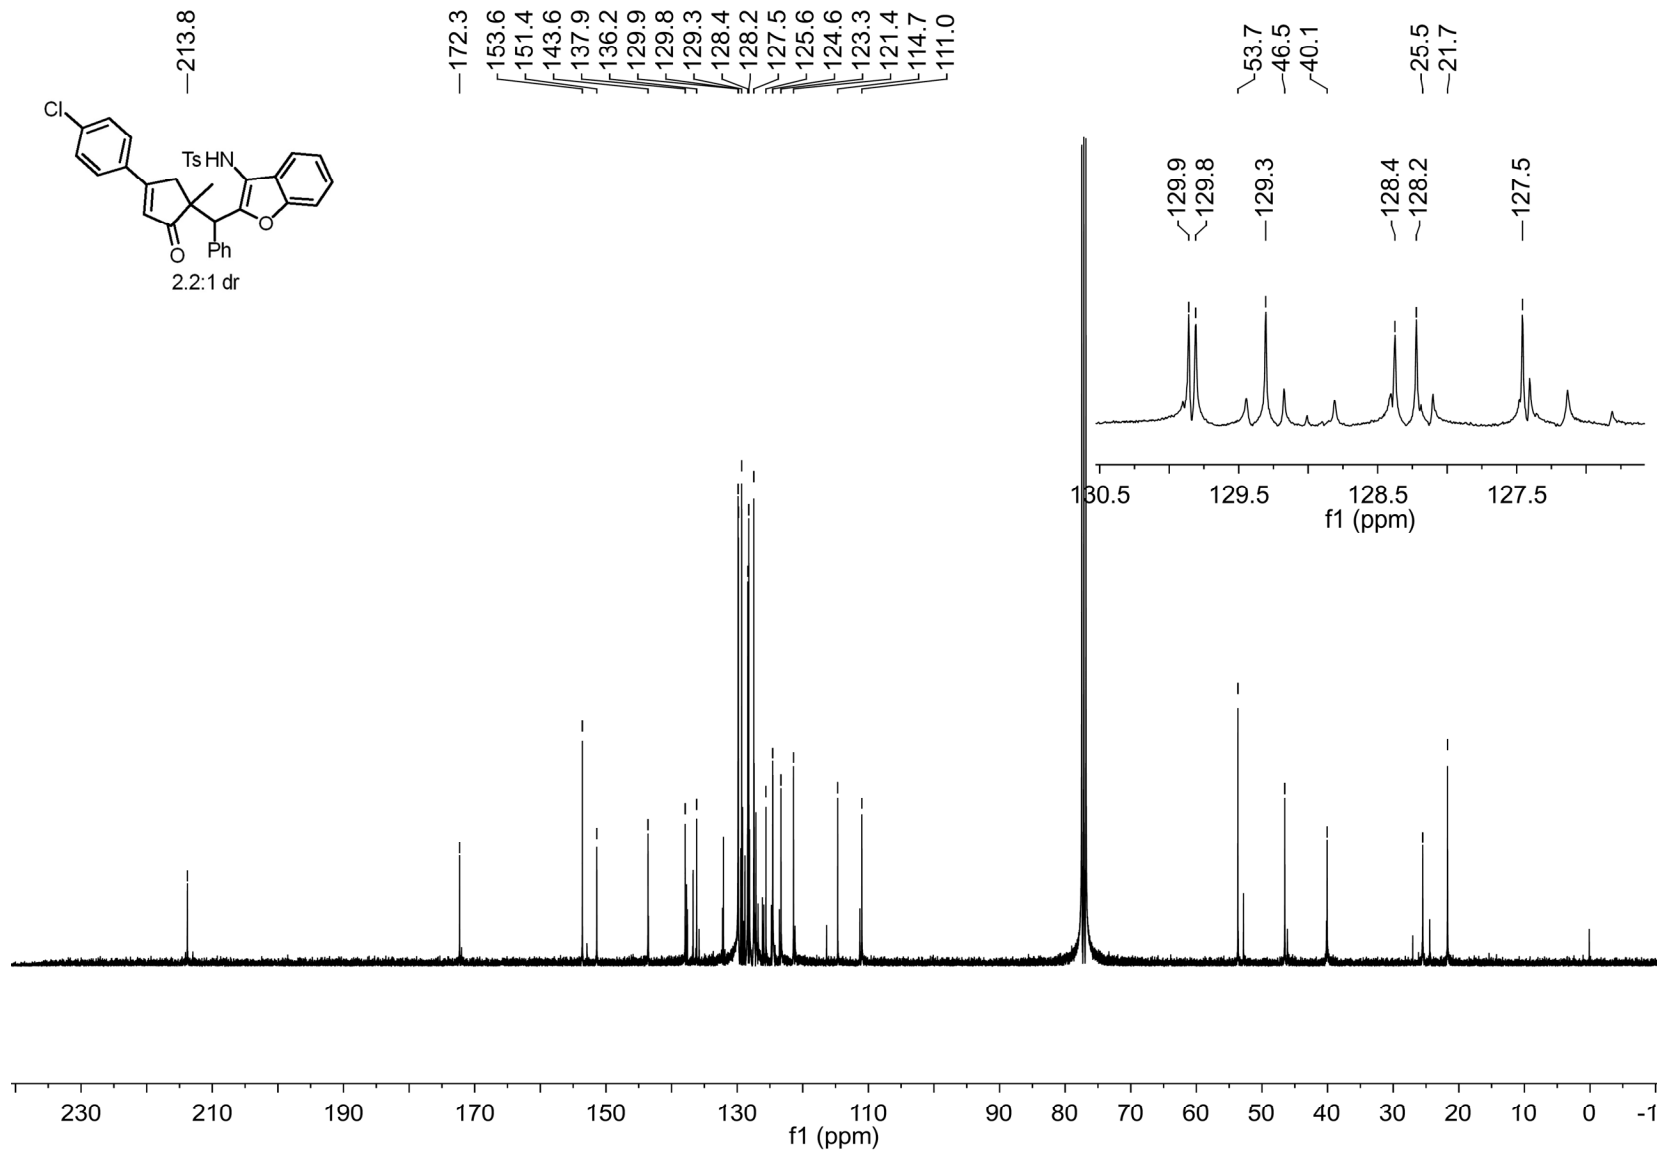

$^{13}\text{C}$  NMR Spectrum of Compound 5e

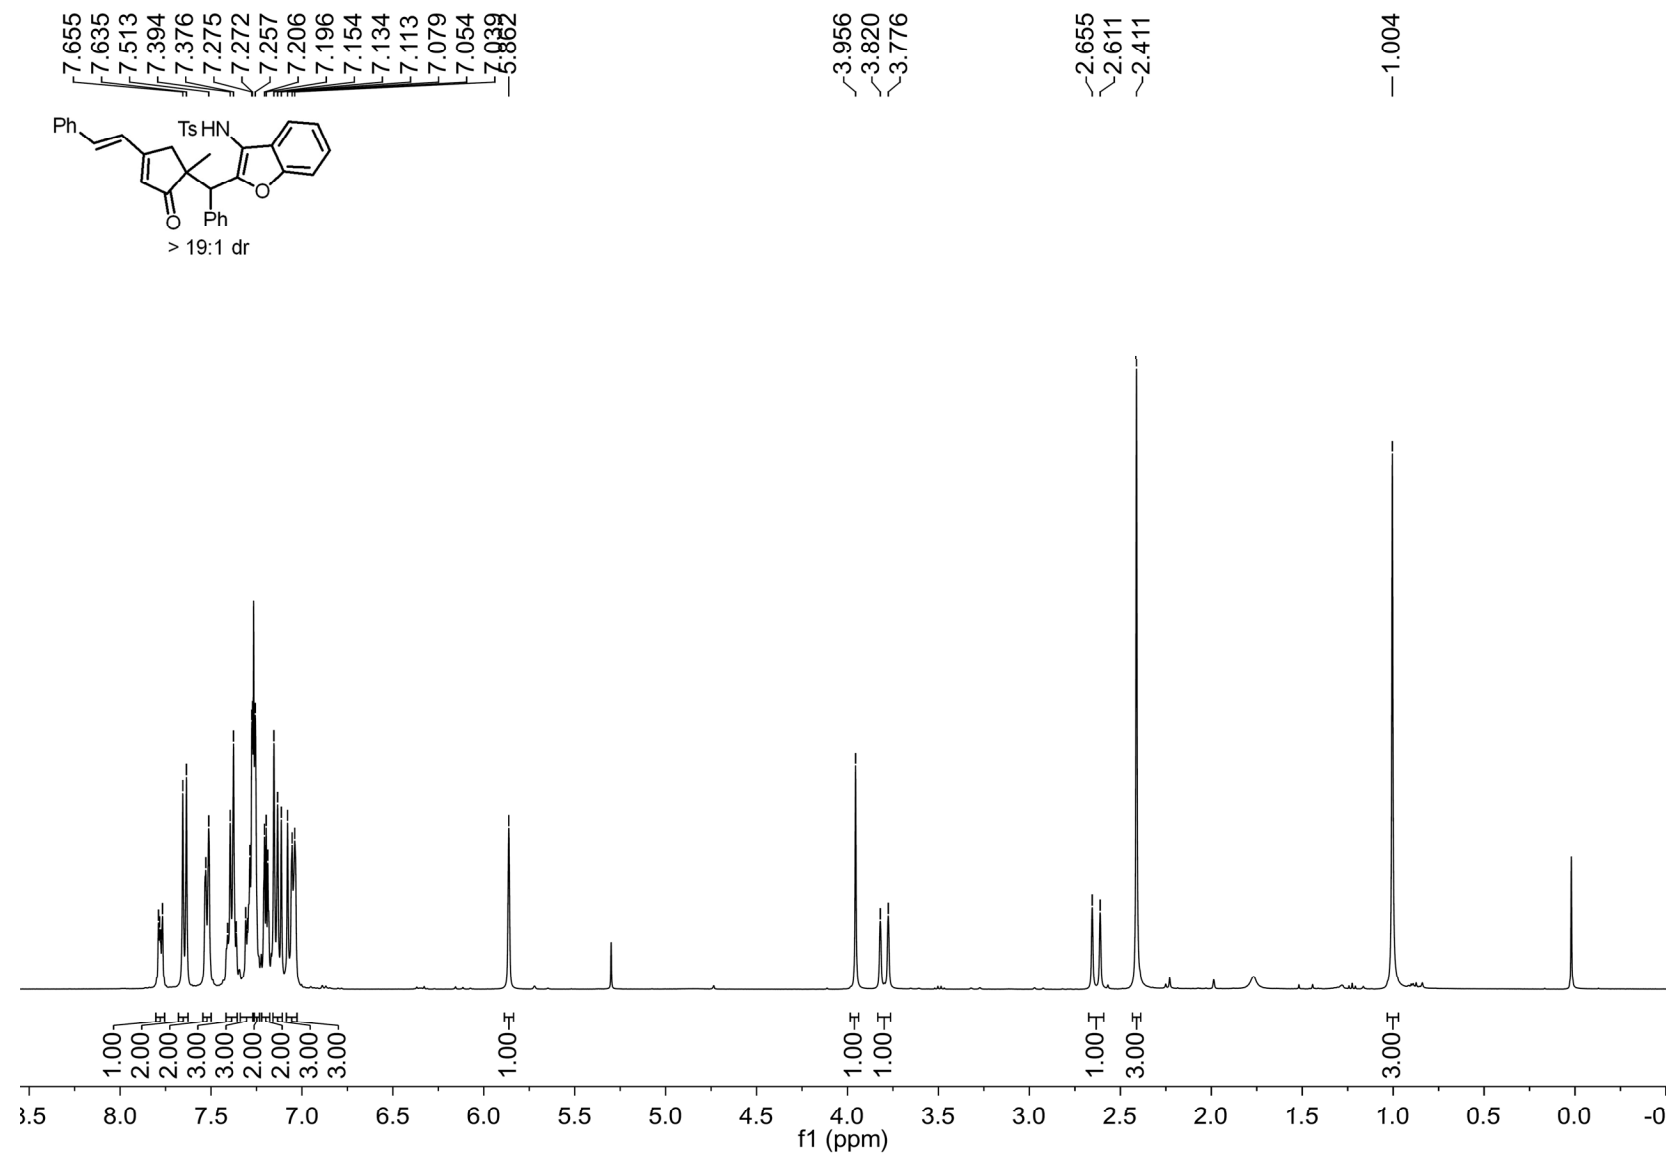

<sup>1</sup>H NMR Spectrum of Compound 5f

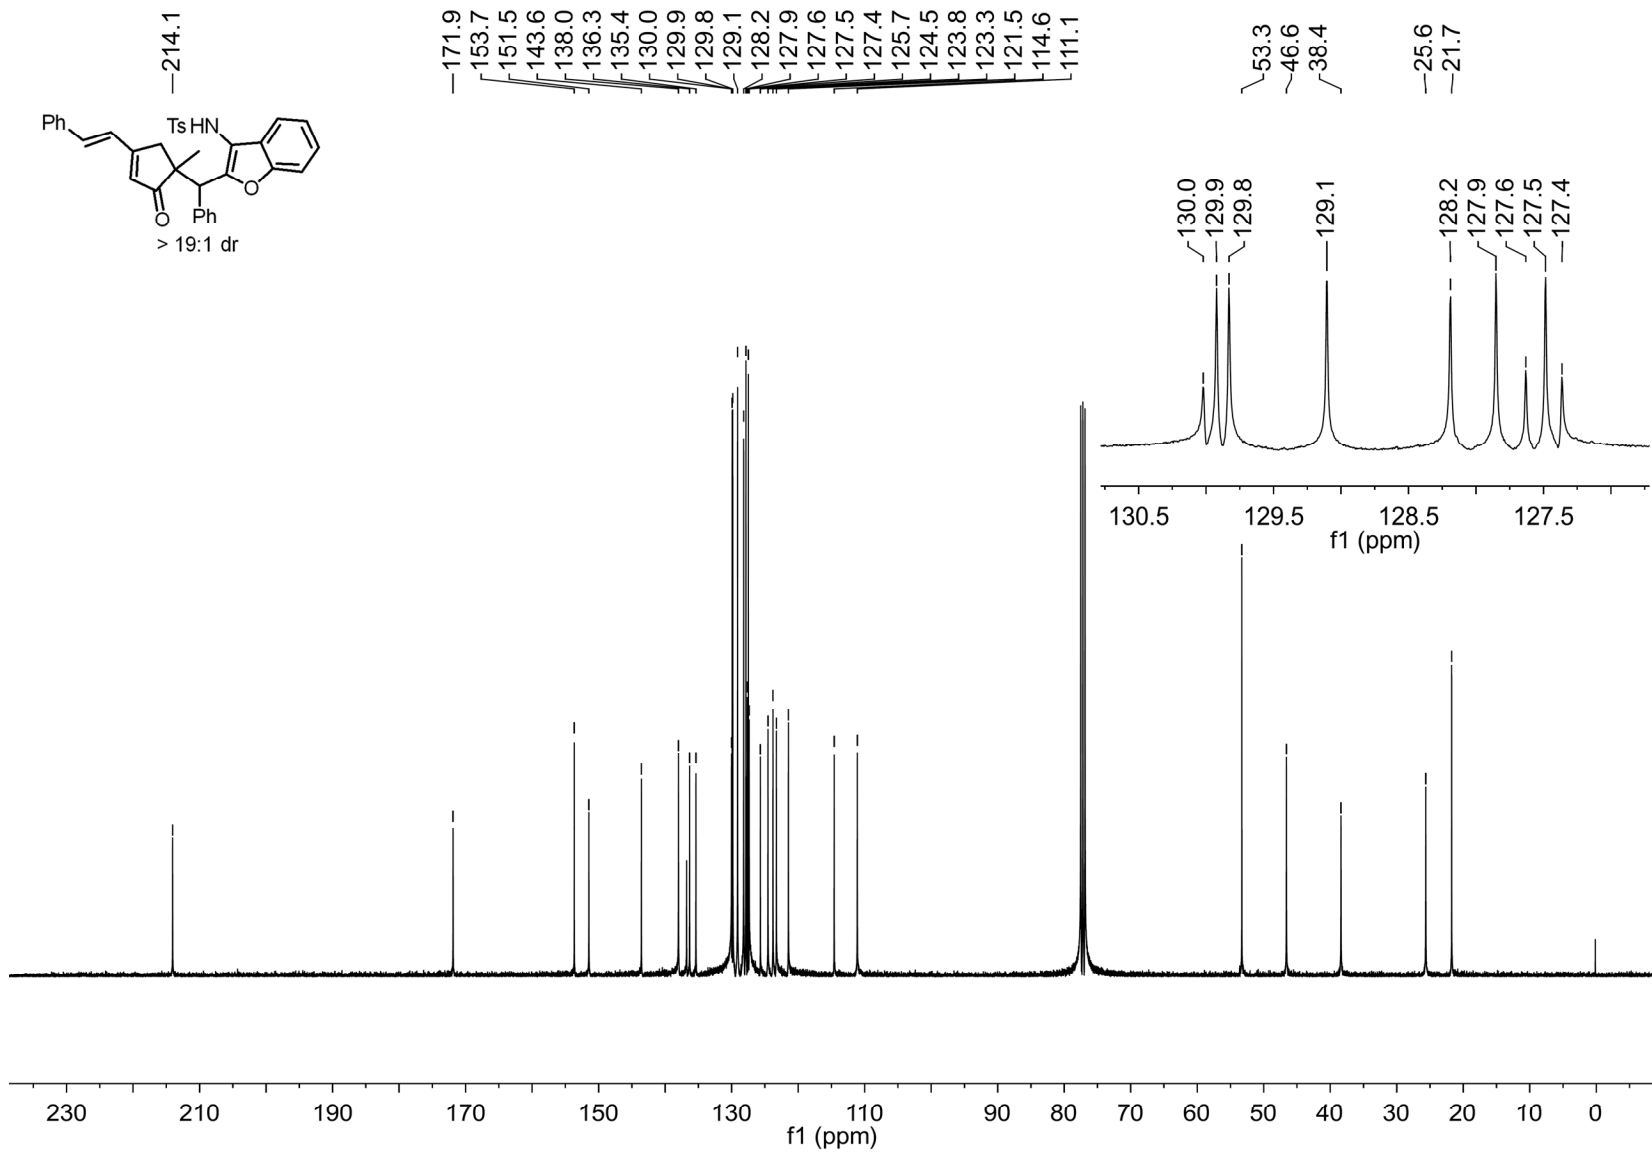

$^{13}\text{C}$  NMR Spectrum of Compound 5f

7.786  
7.771  
7.766  
7.628  
7.607  
7.278  
7.244  
7.234  
7.219  
7.202  
7.183  
7.137  
7.116  
6.935  
6.922  
6.895

3.875  
3.616  
3.559

2.395  
2.275  
2.228

-0.900

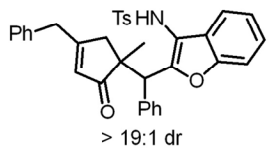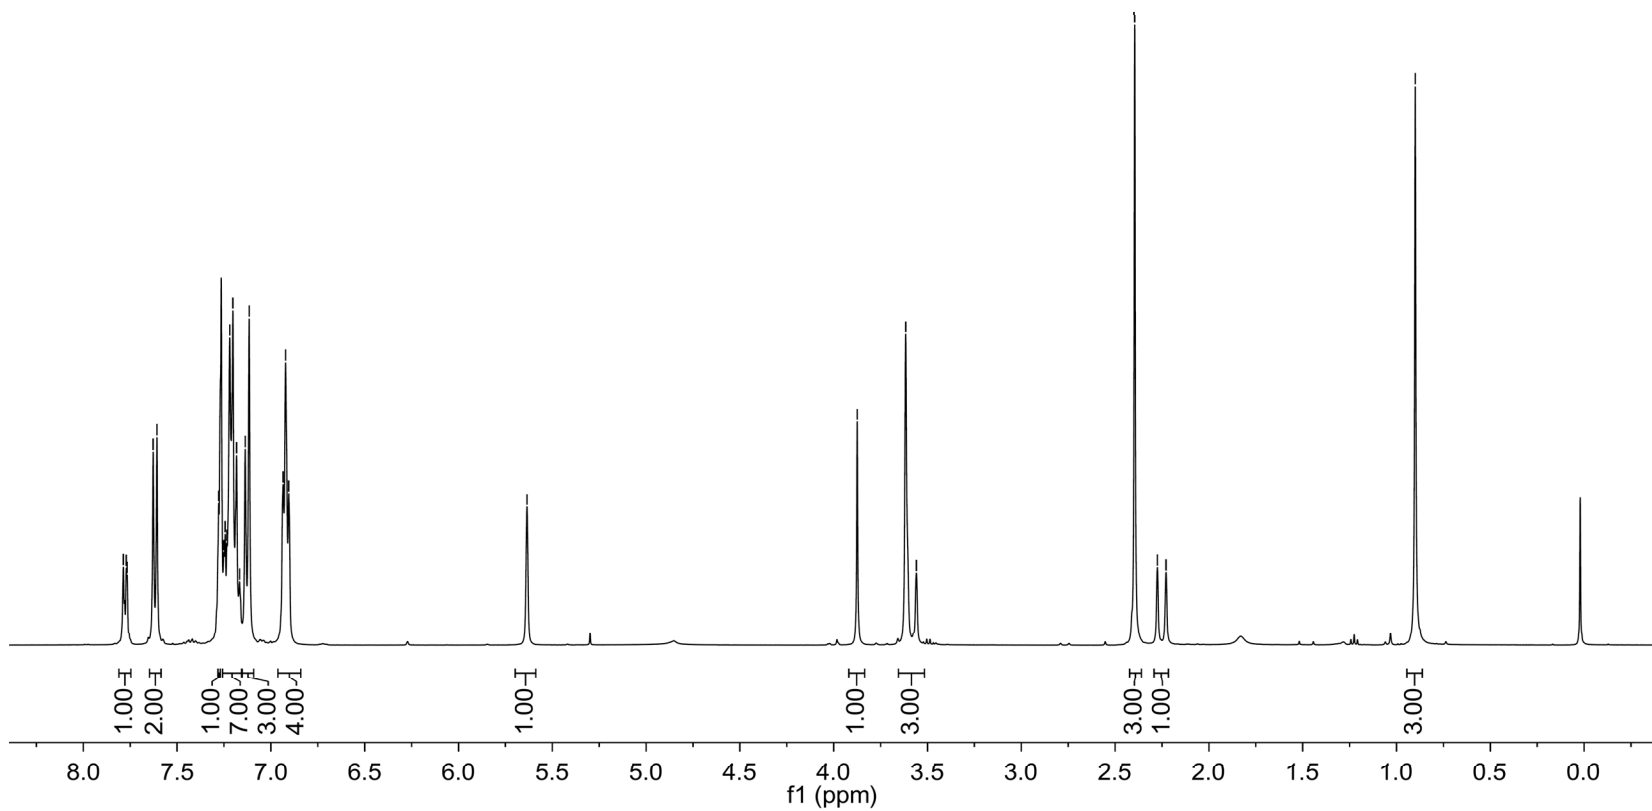

**<sup>1</sup>H NMR Spectrum of Compound 5g**

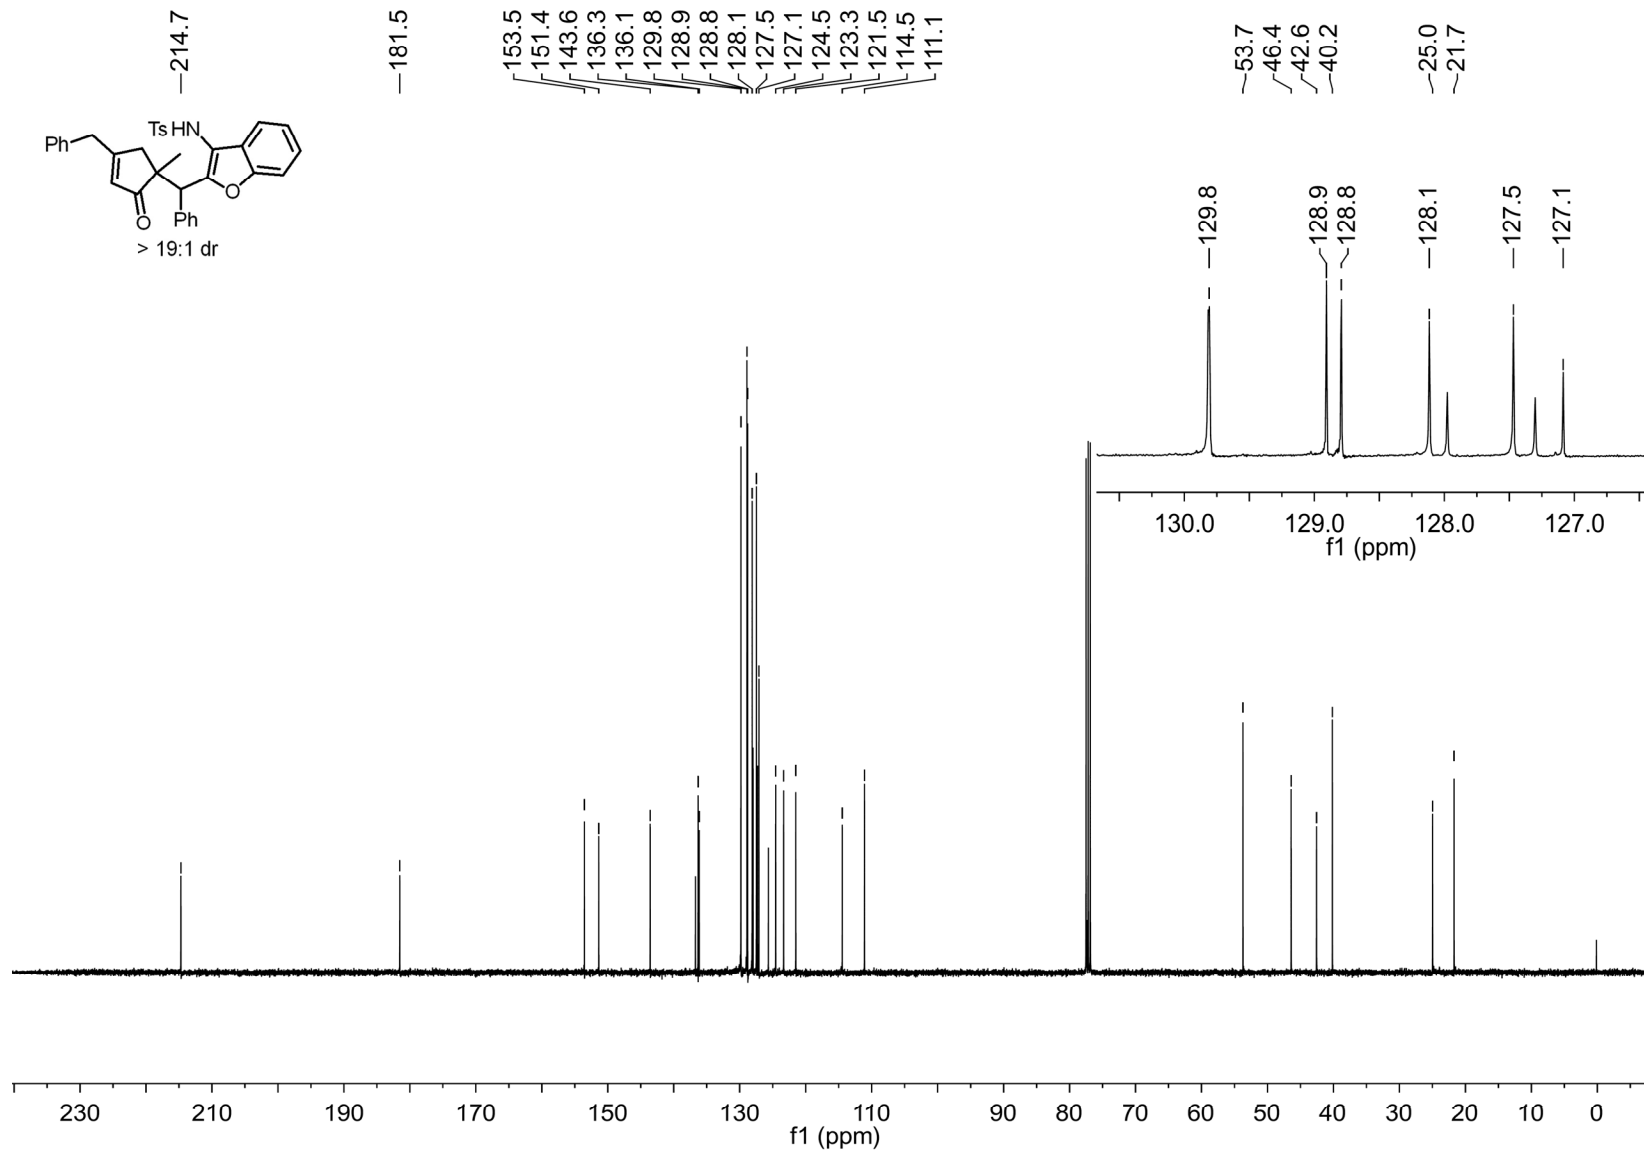

$^{13}\text{C}$  NMR Spectrum of Compound 5g

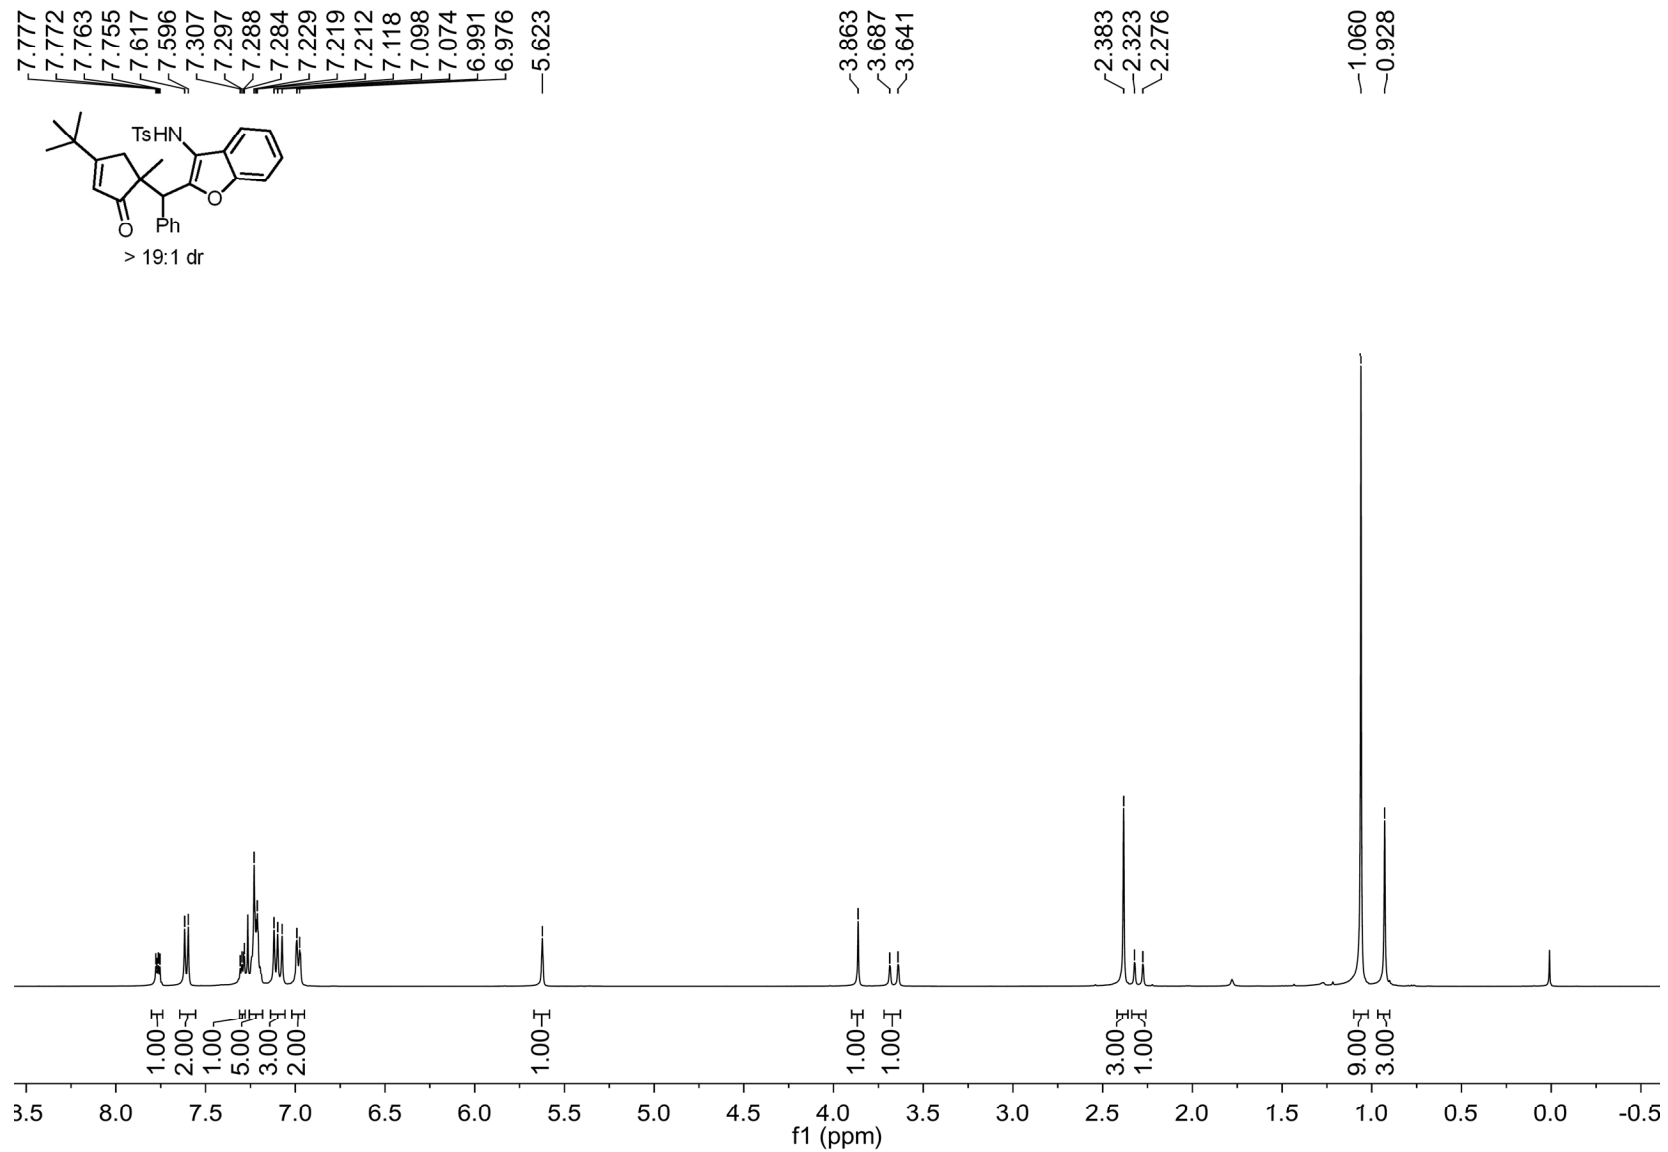

<sup>1</sup>H NMR Spectrum of Compound 5h

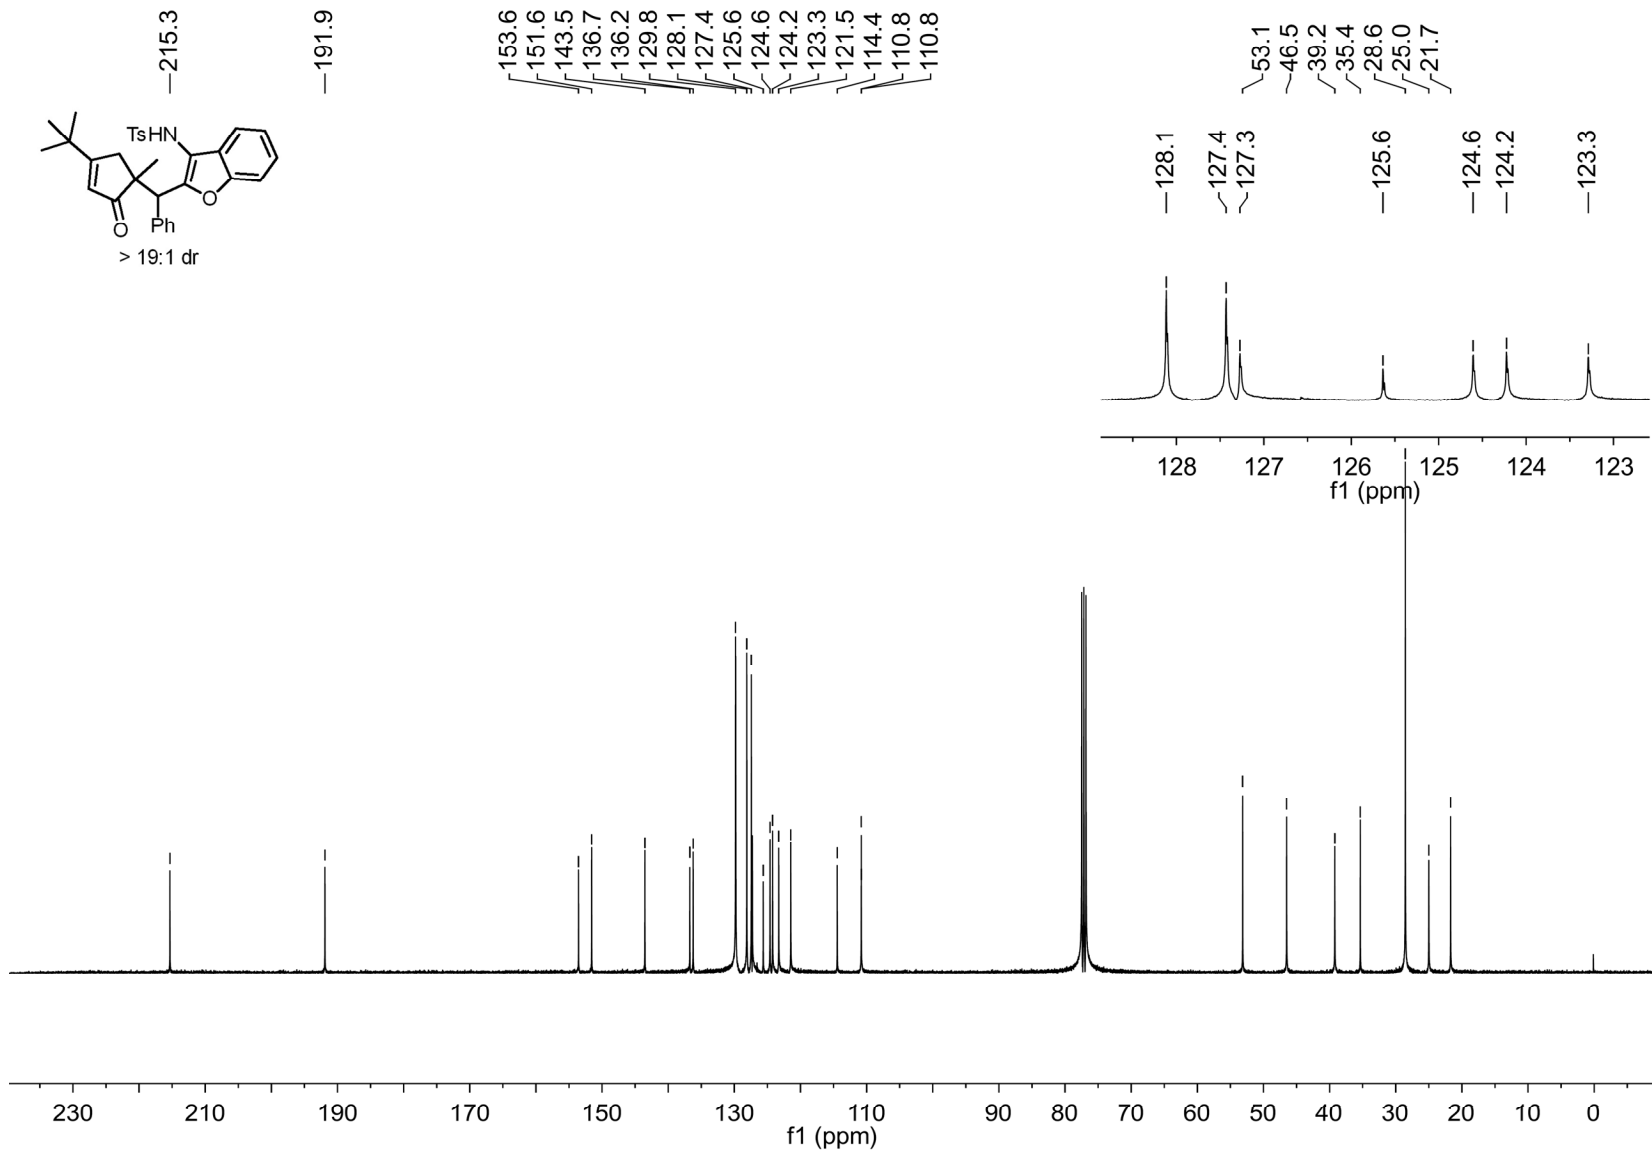



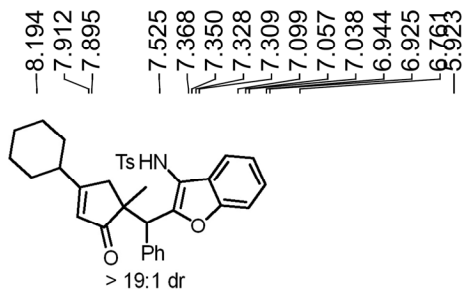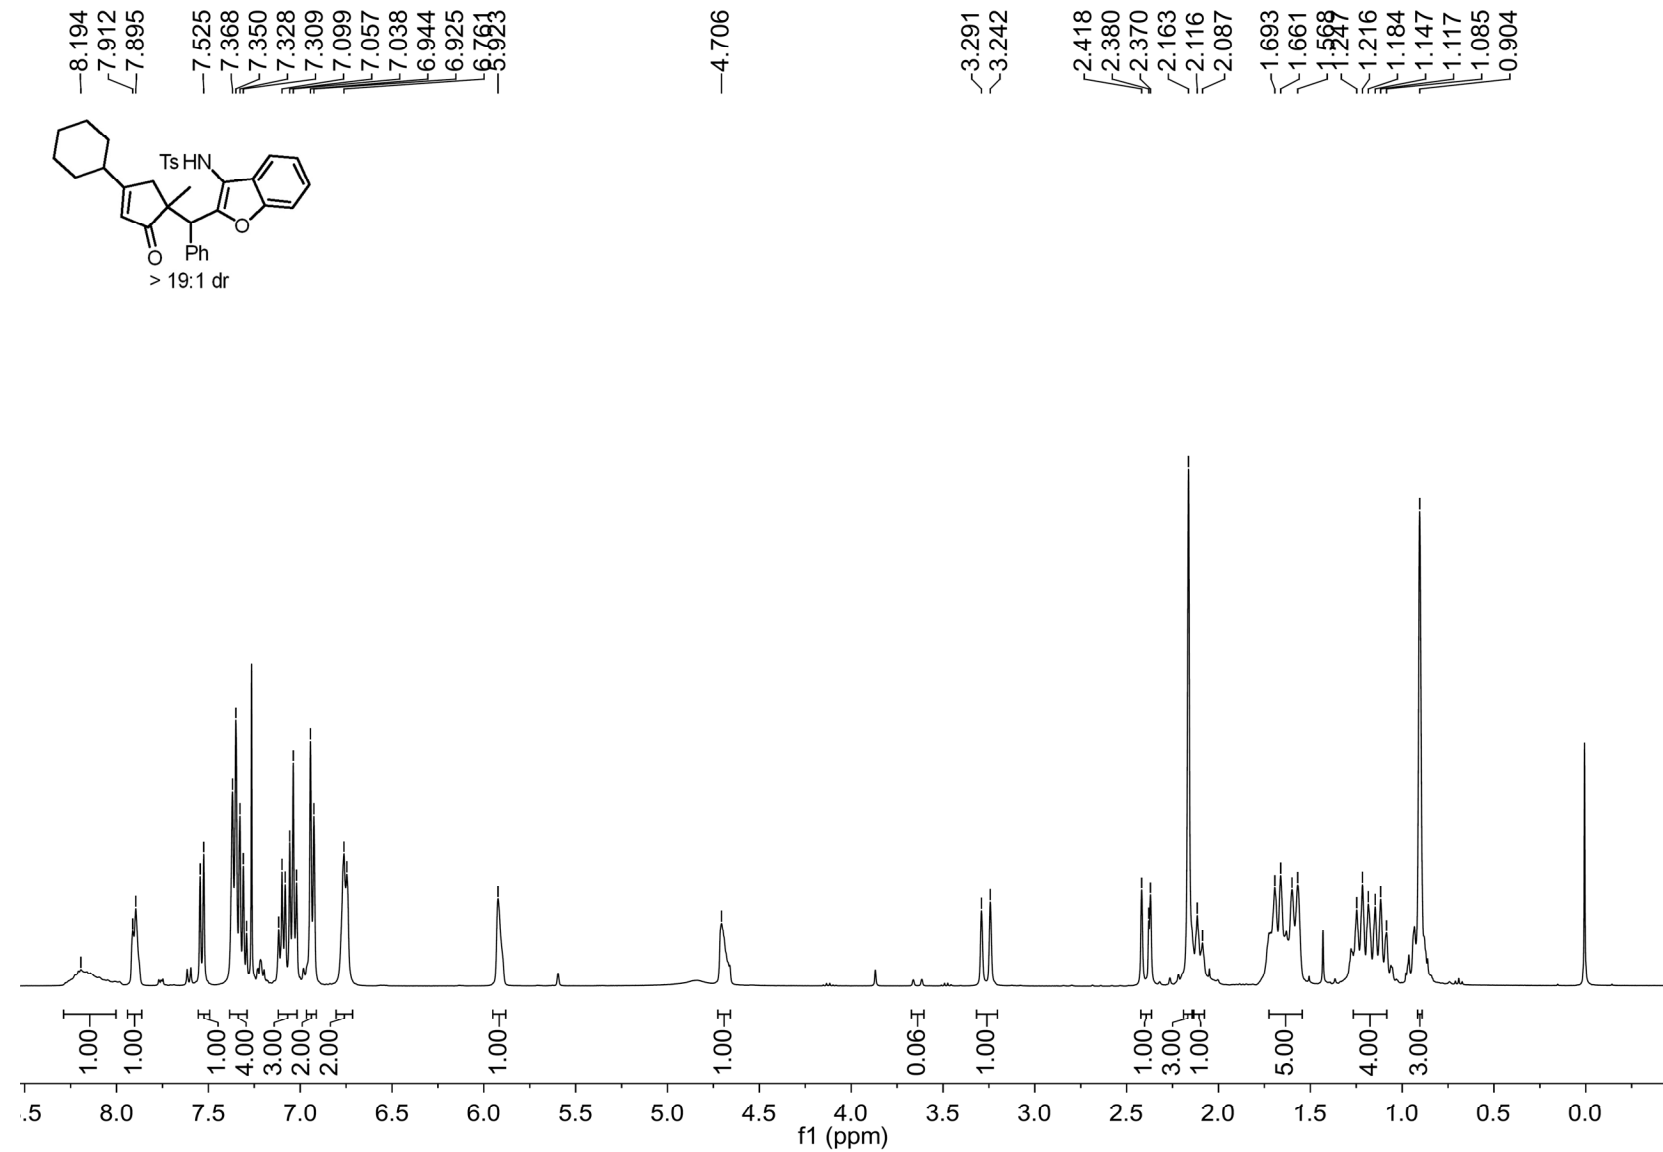

<sup>1</sup>H NMR Spectrum of Compound 5i

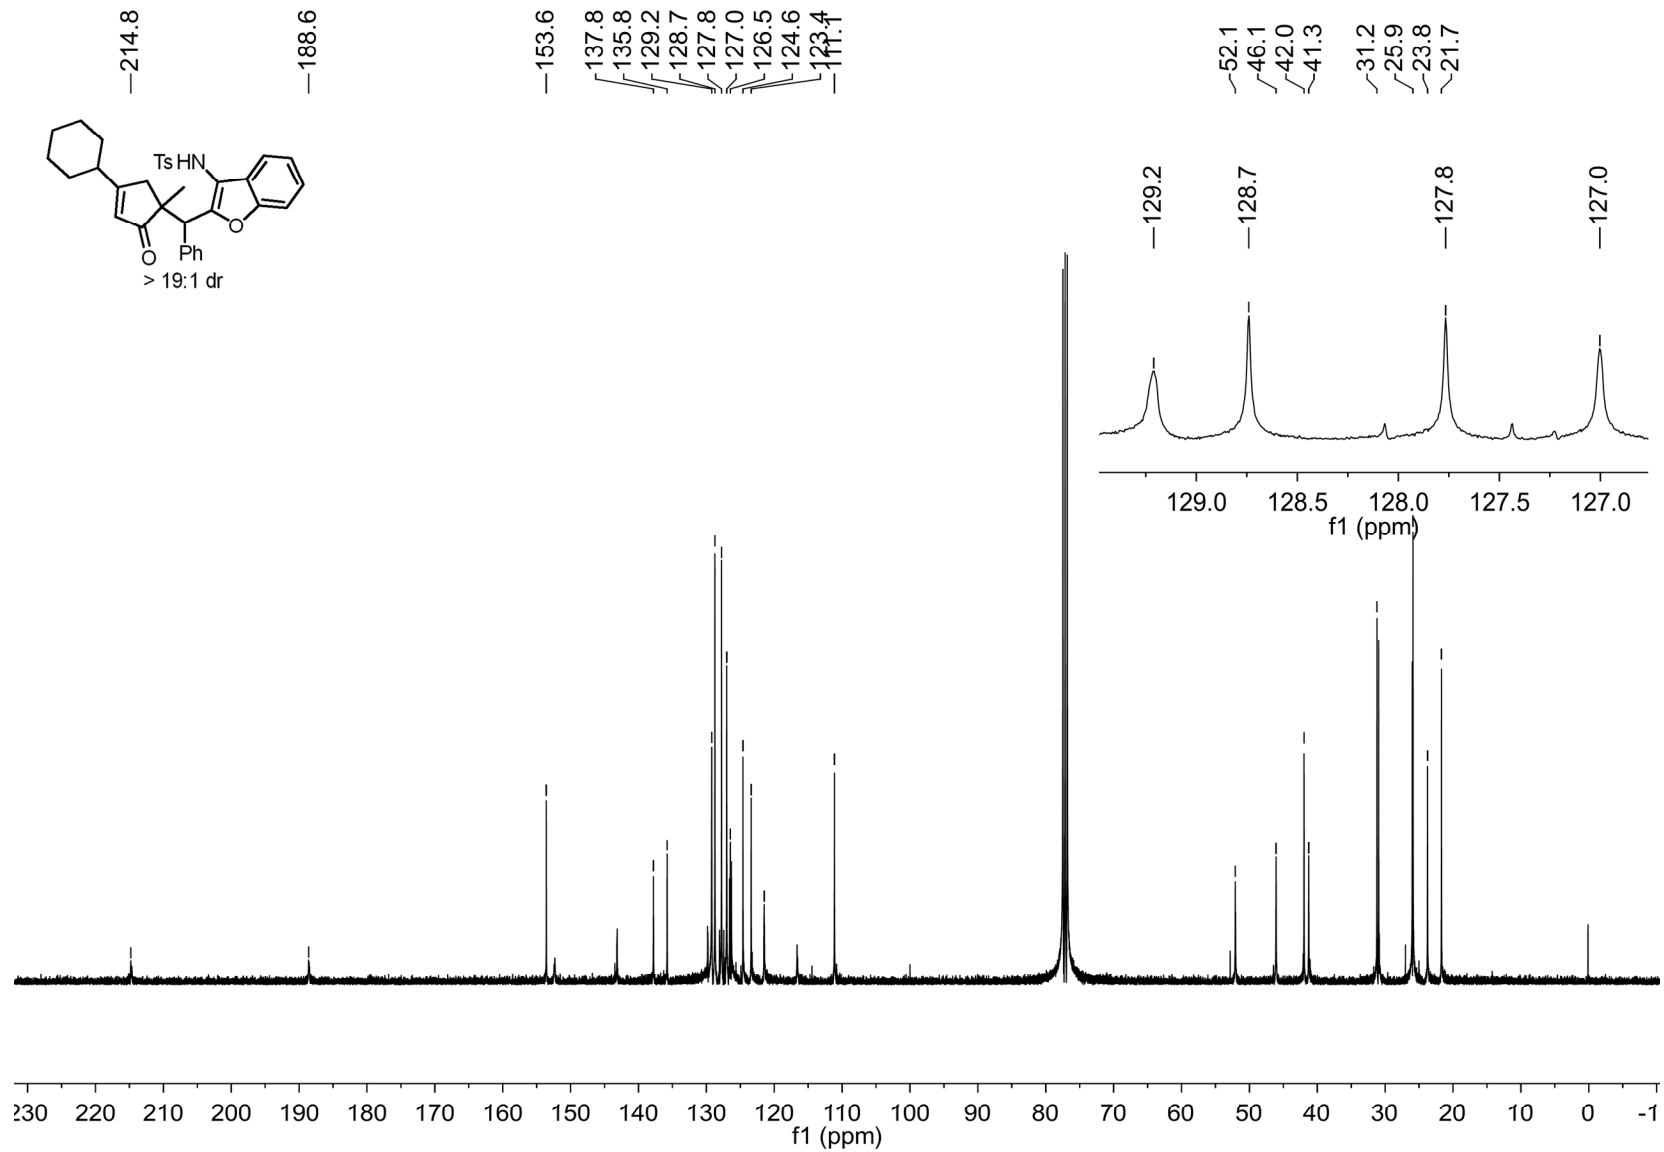

$^{13}\text{C}$  NMR Spectrum of Compound 5i

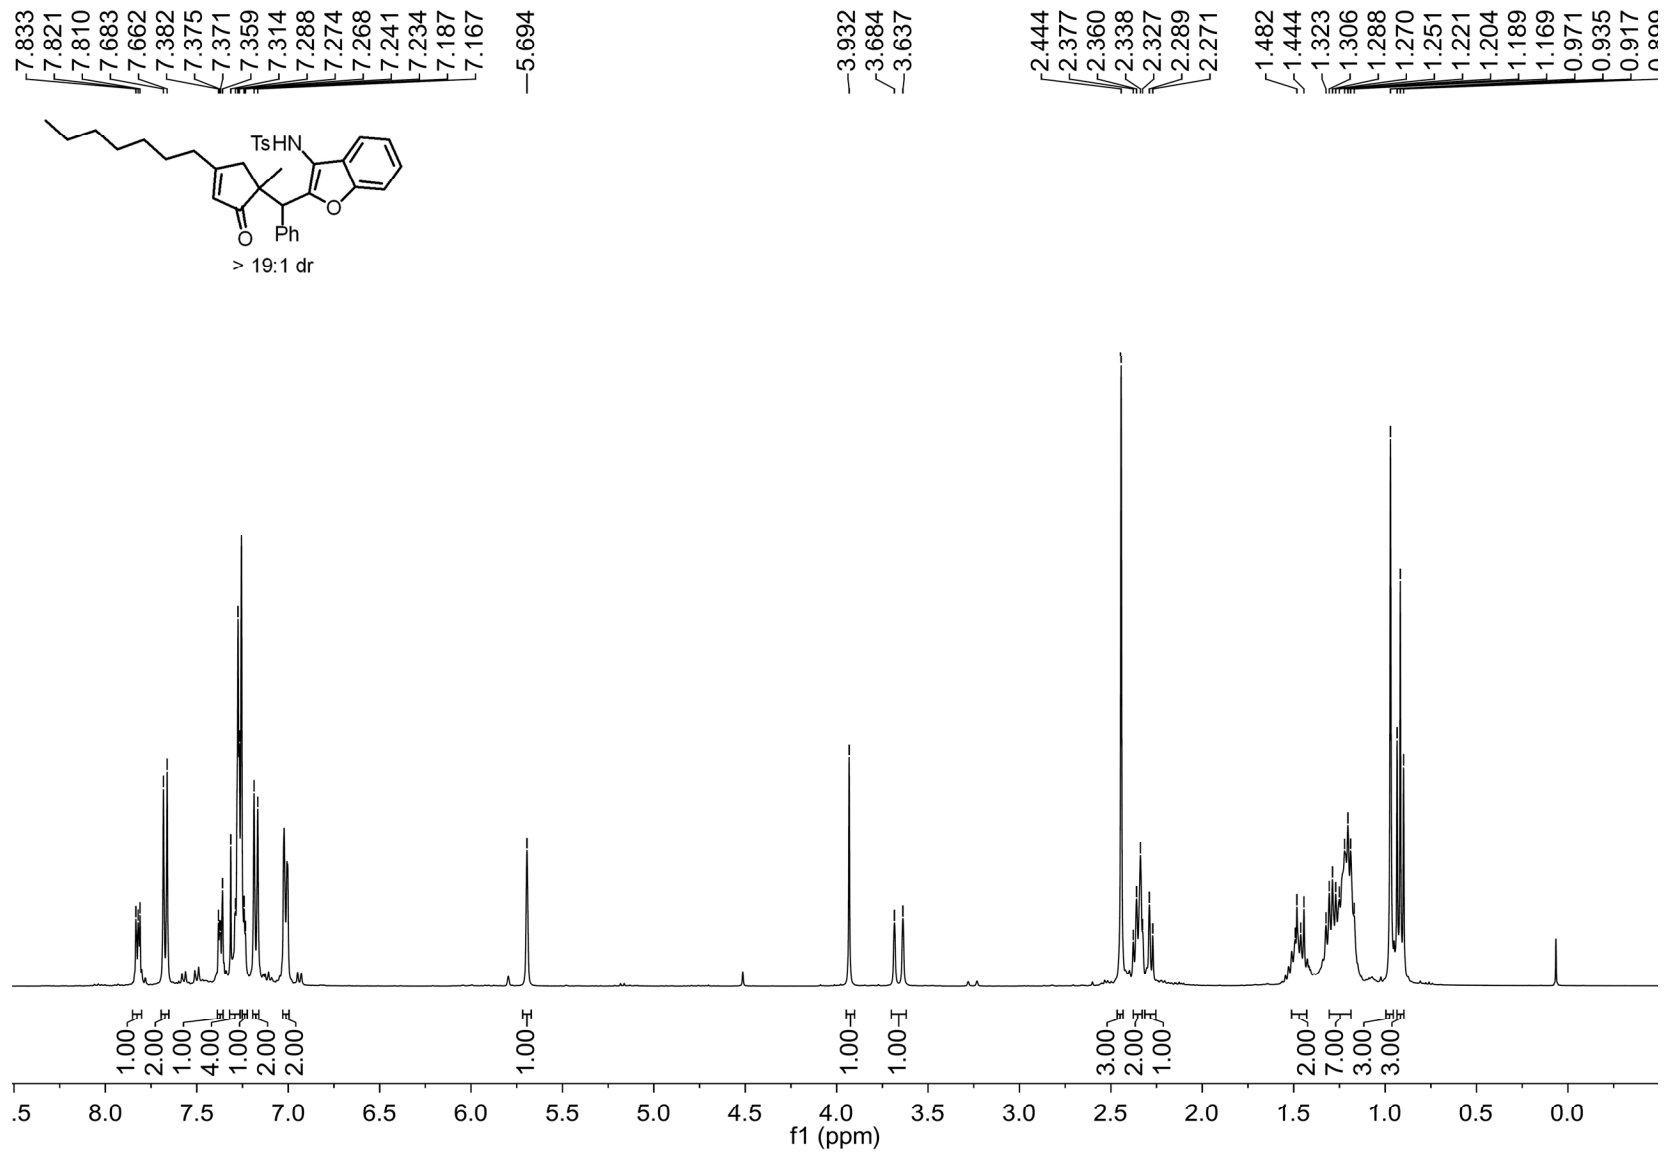

**<sup>1</sup>H NMR Spectrum of Compound 5j**

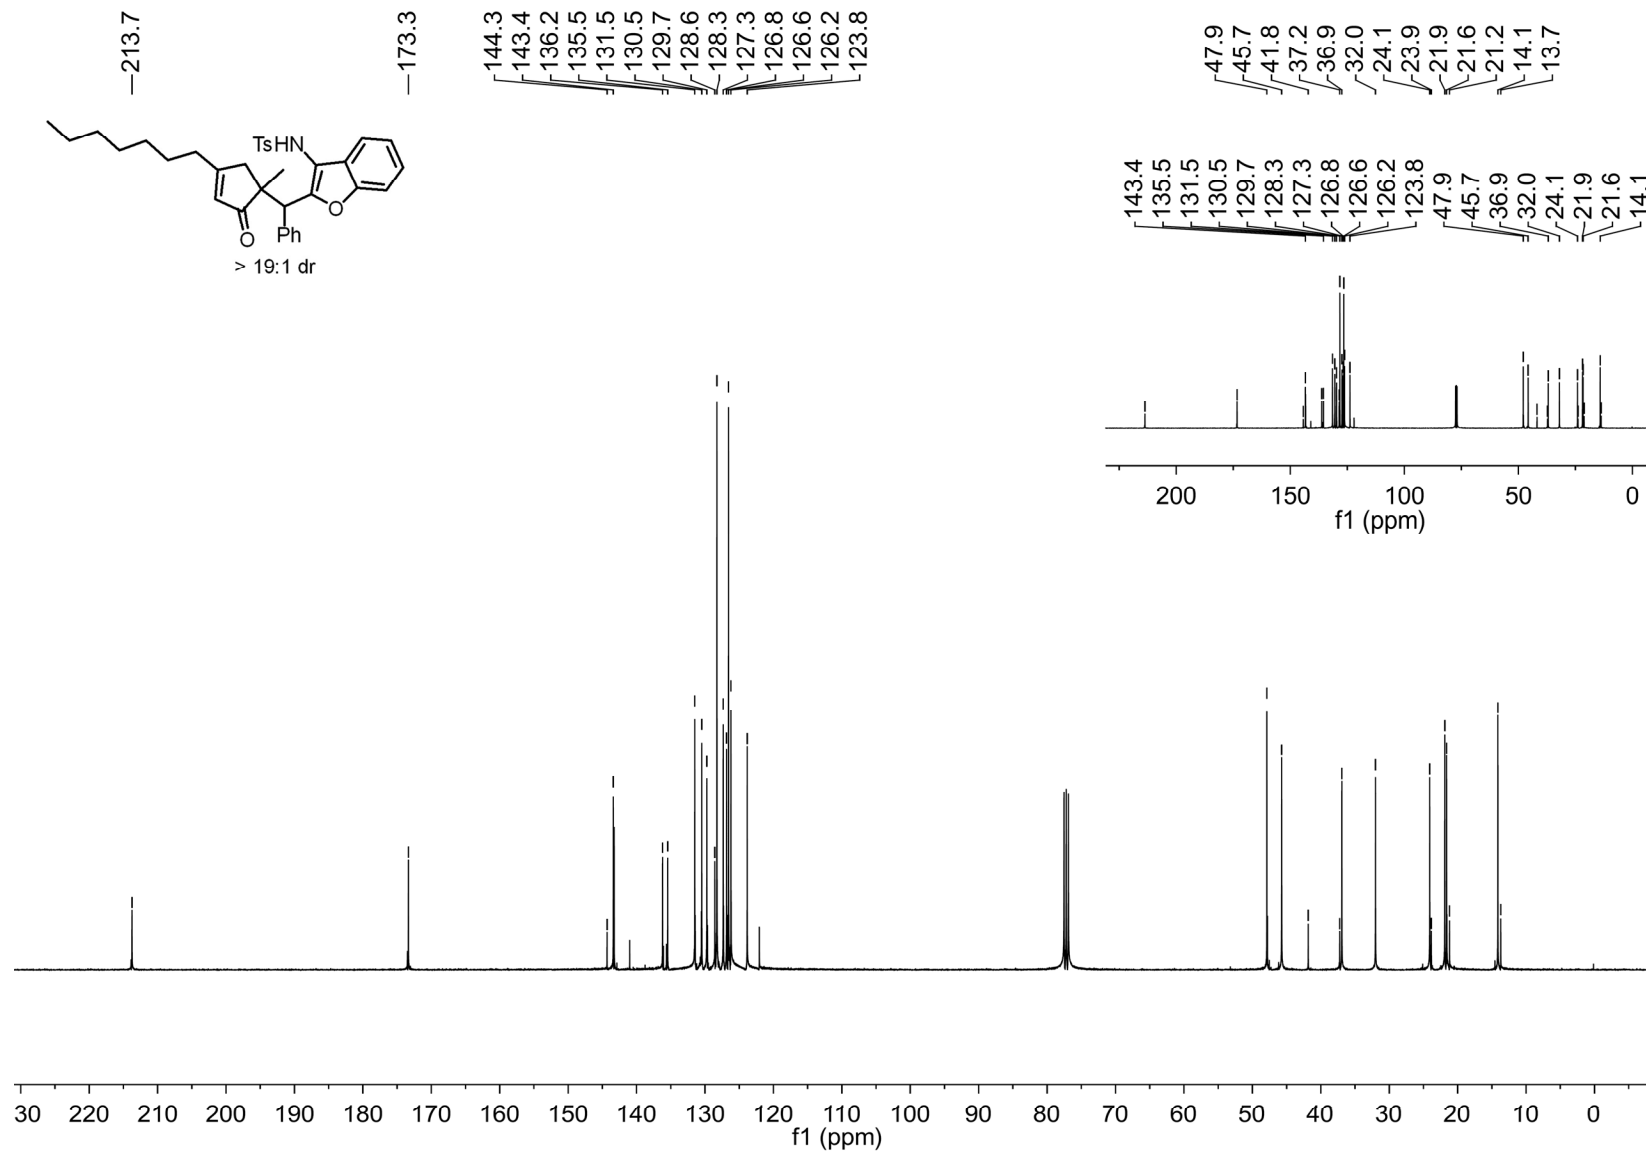

**<sup>13</sup>C NMR Spectrum of Compound 5j**

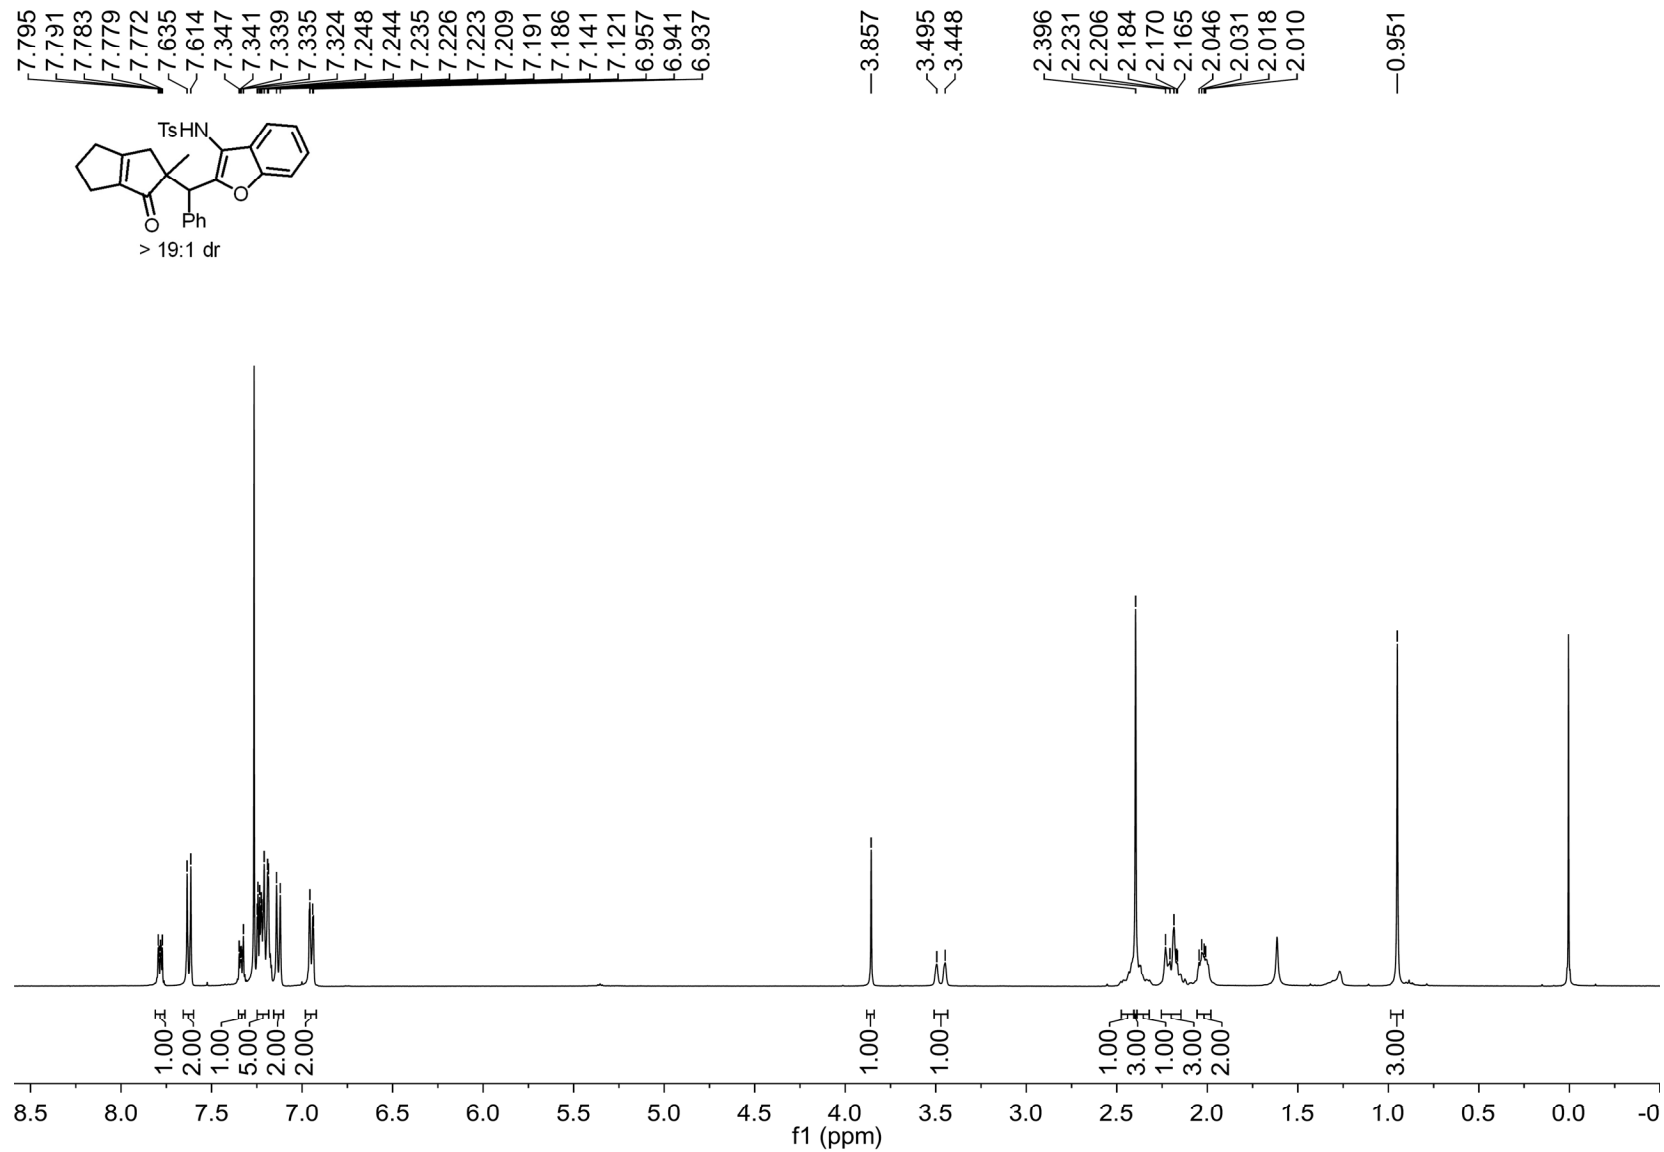

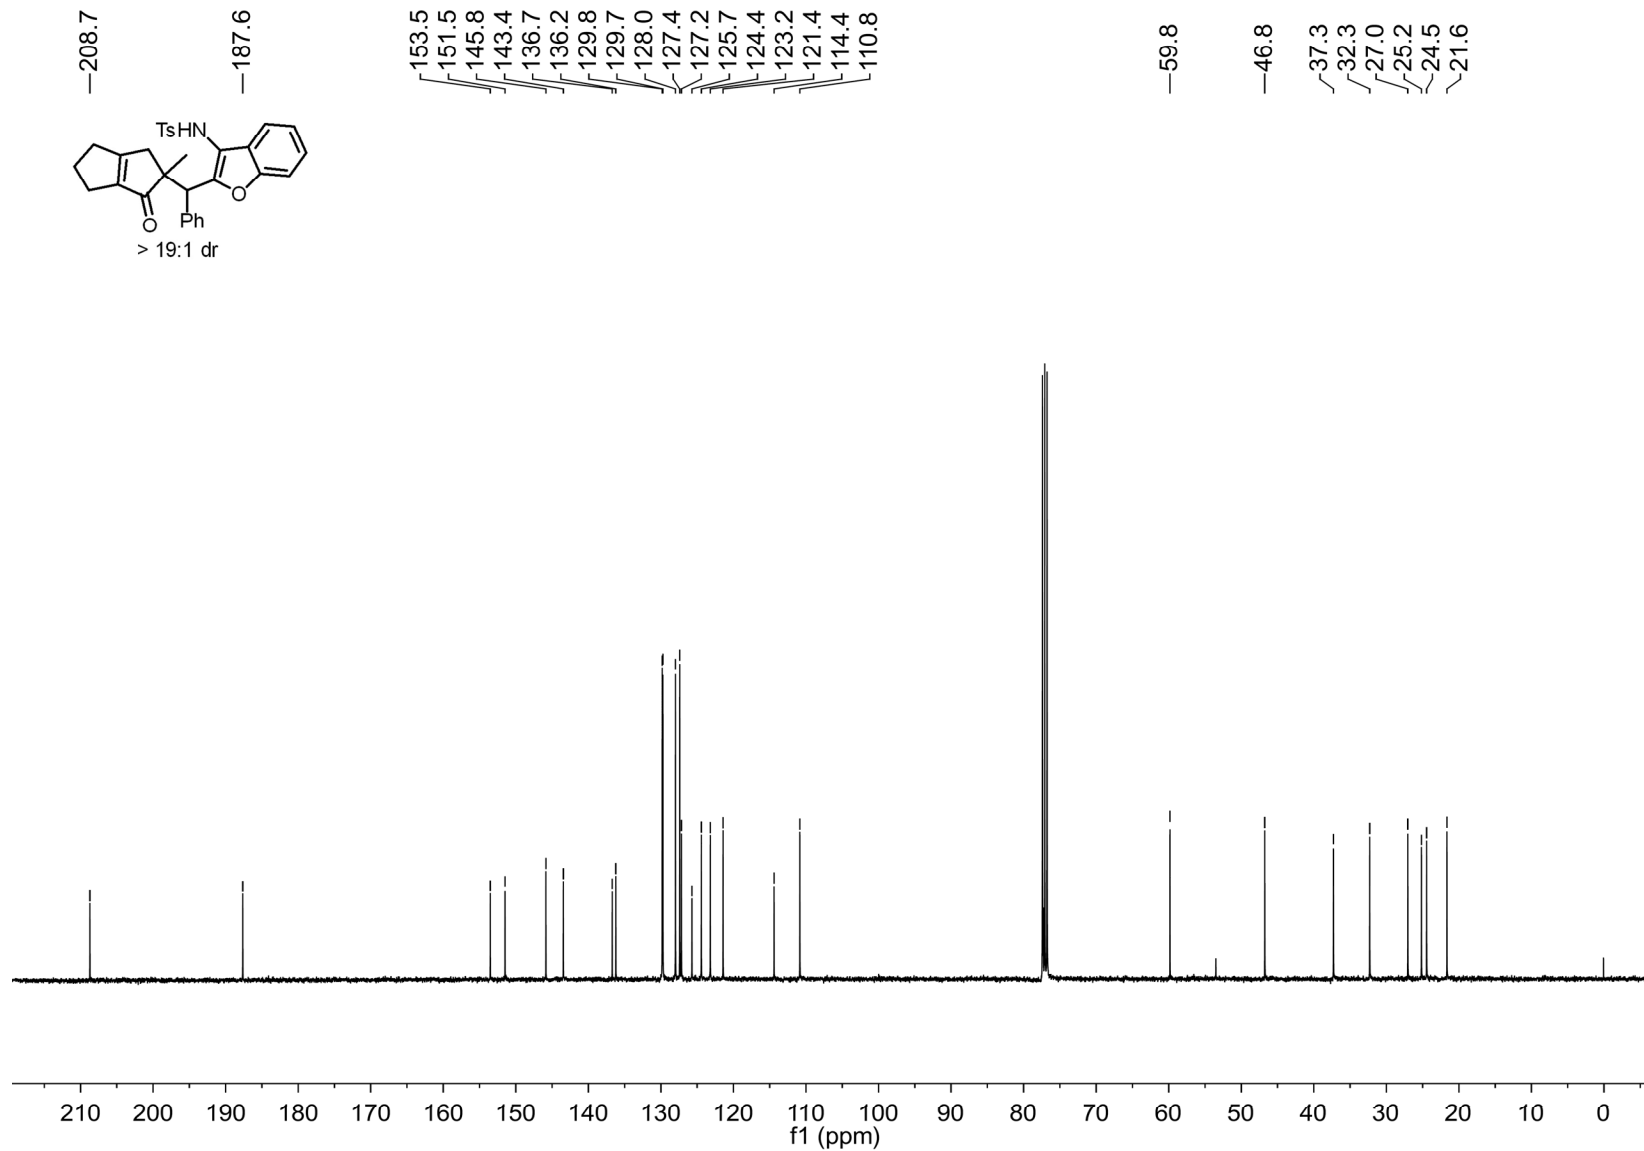

**$^{13}\text{C}$  NMR Spectrum of Compound 5k**

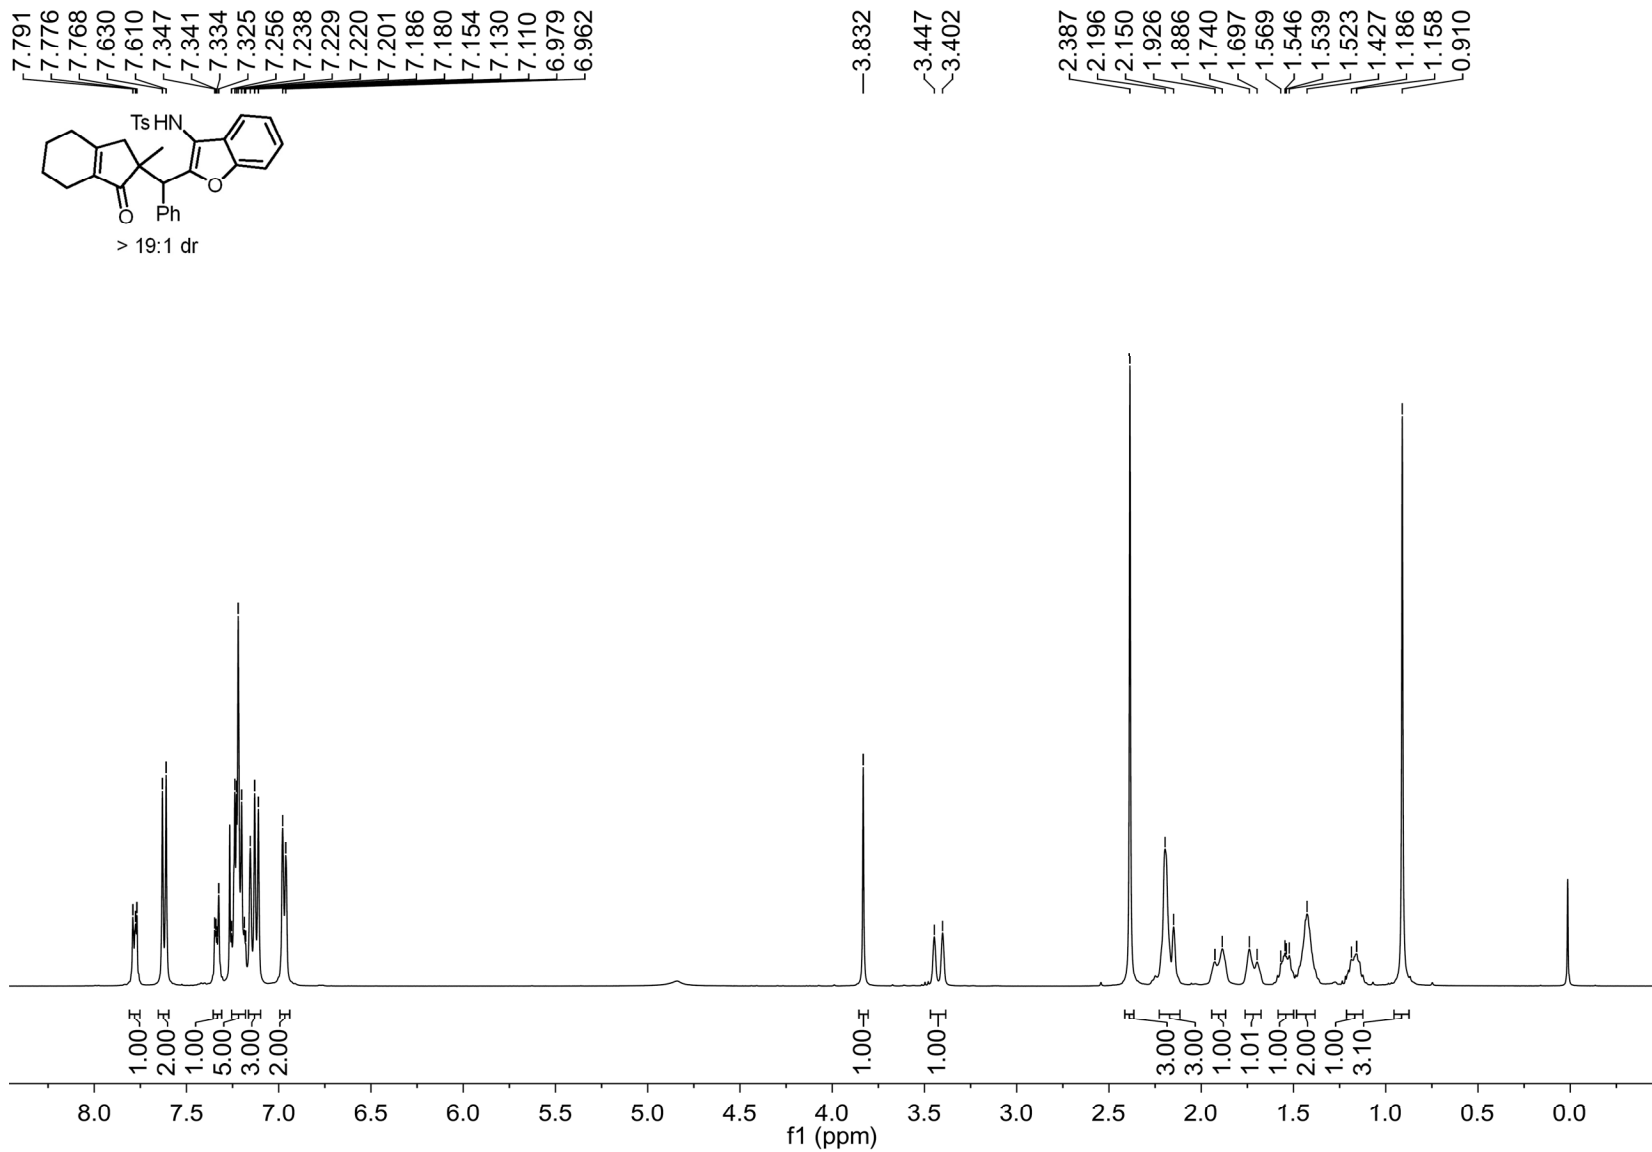

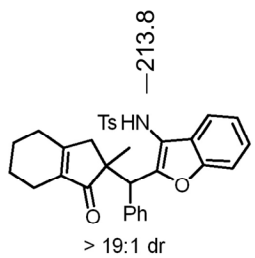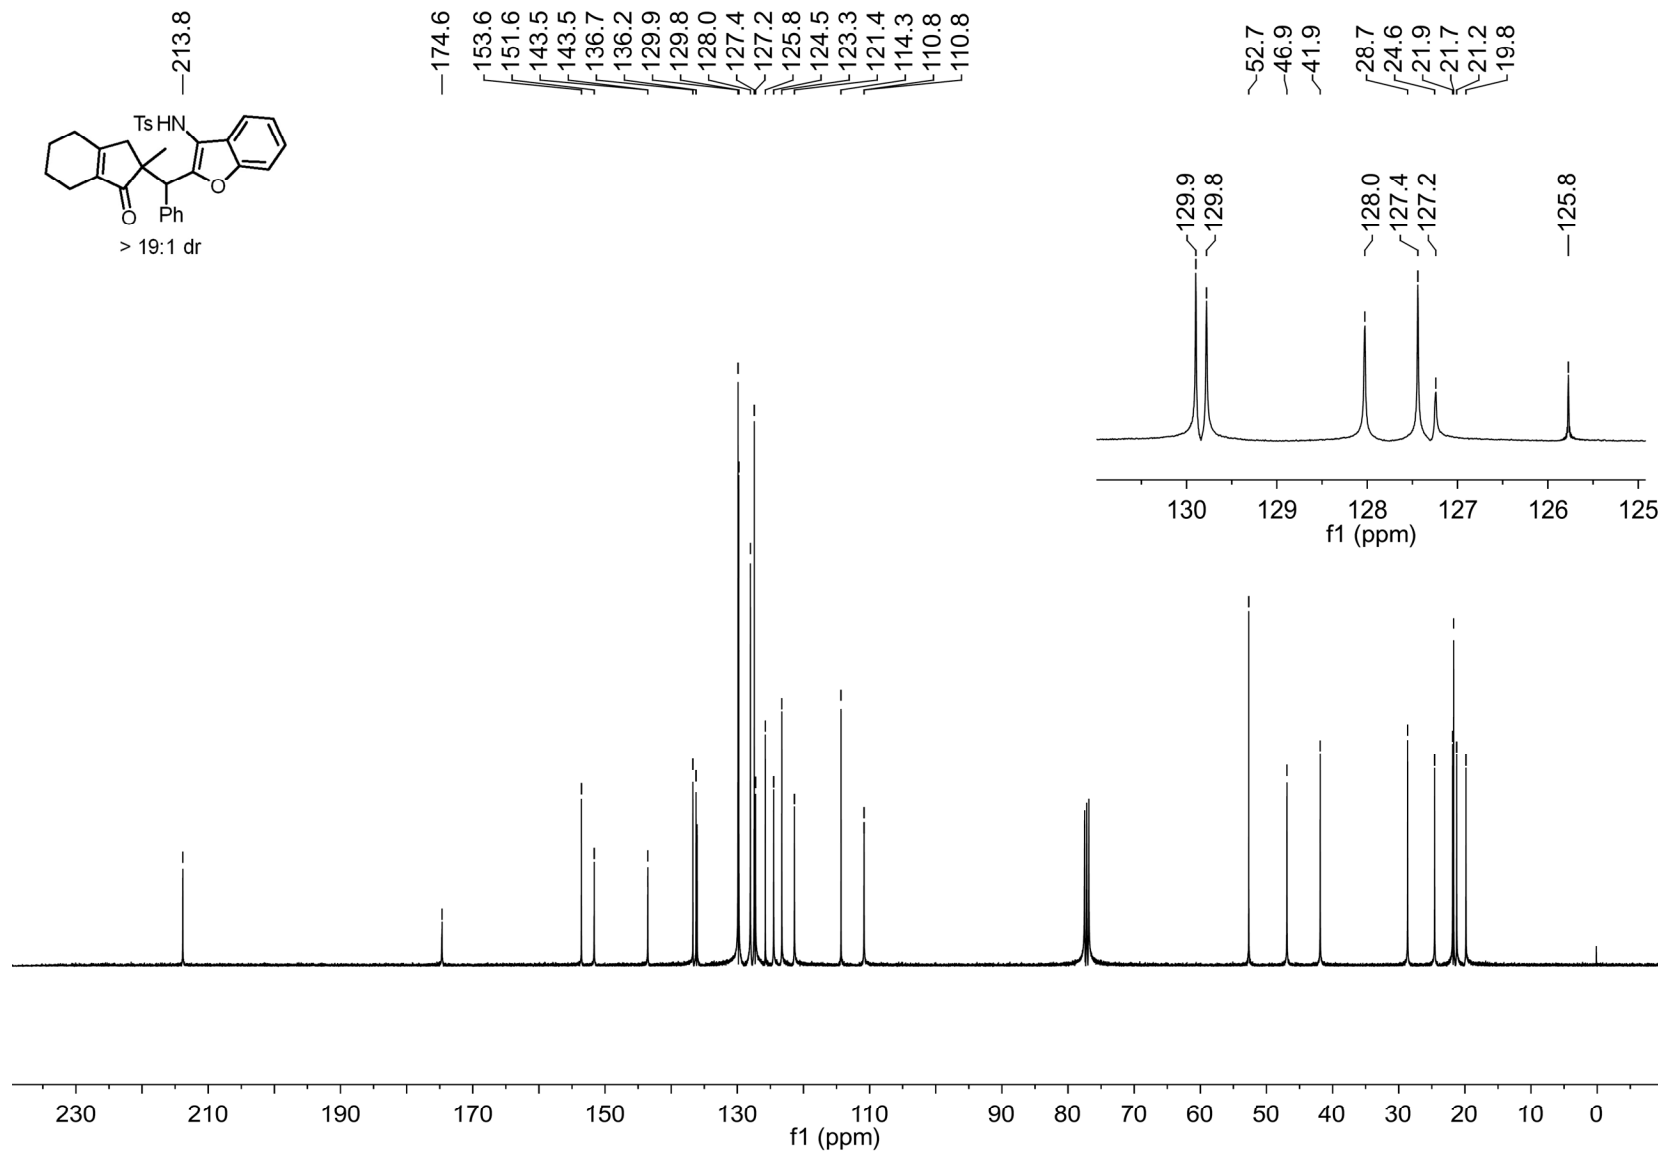

$^{13}\text{C}$  NMR Spectrum of Compound 51



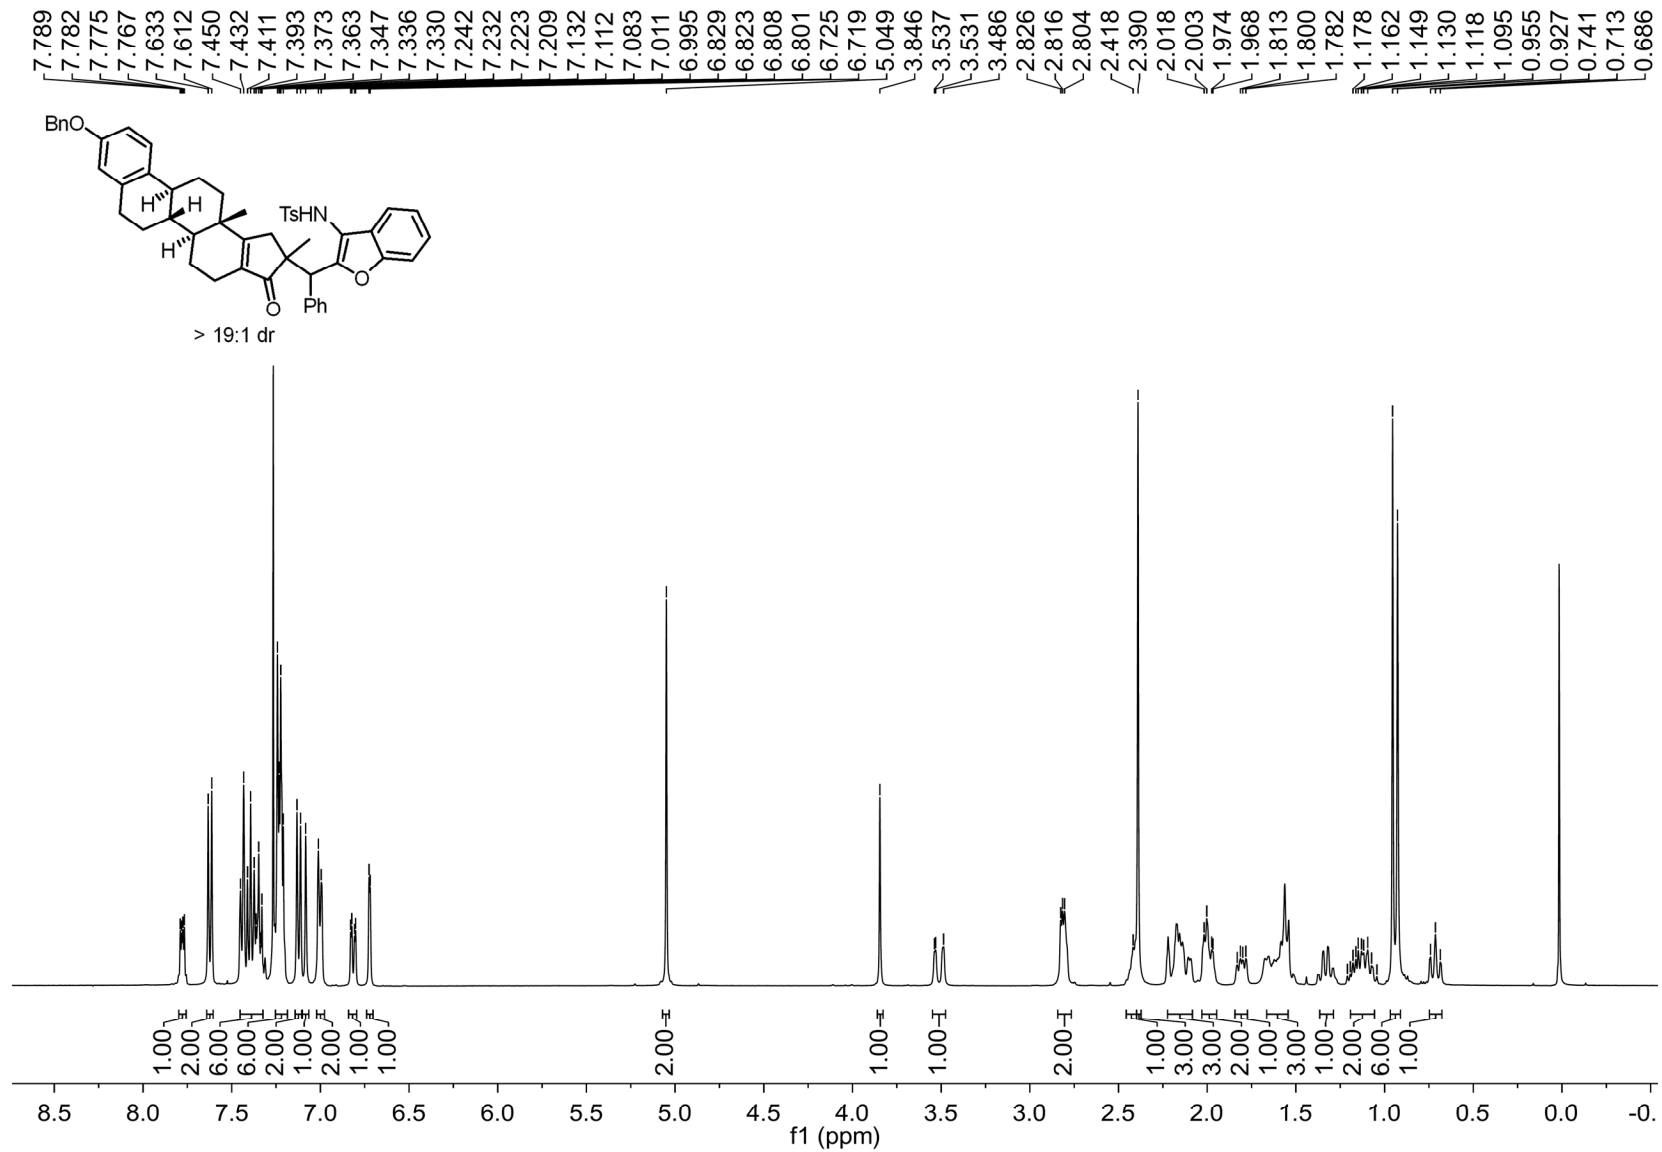

**<sup>1</sup>H NMR Spectrum of Compound 5m**

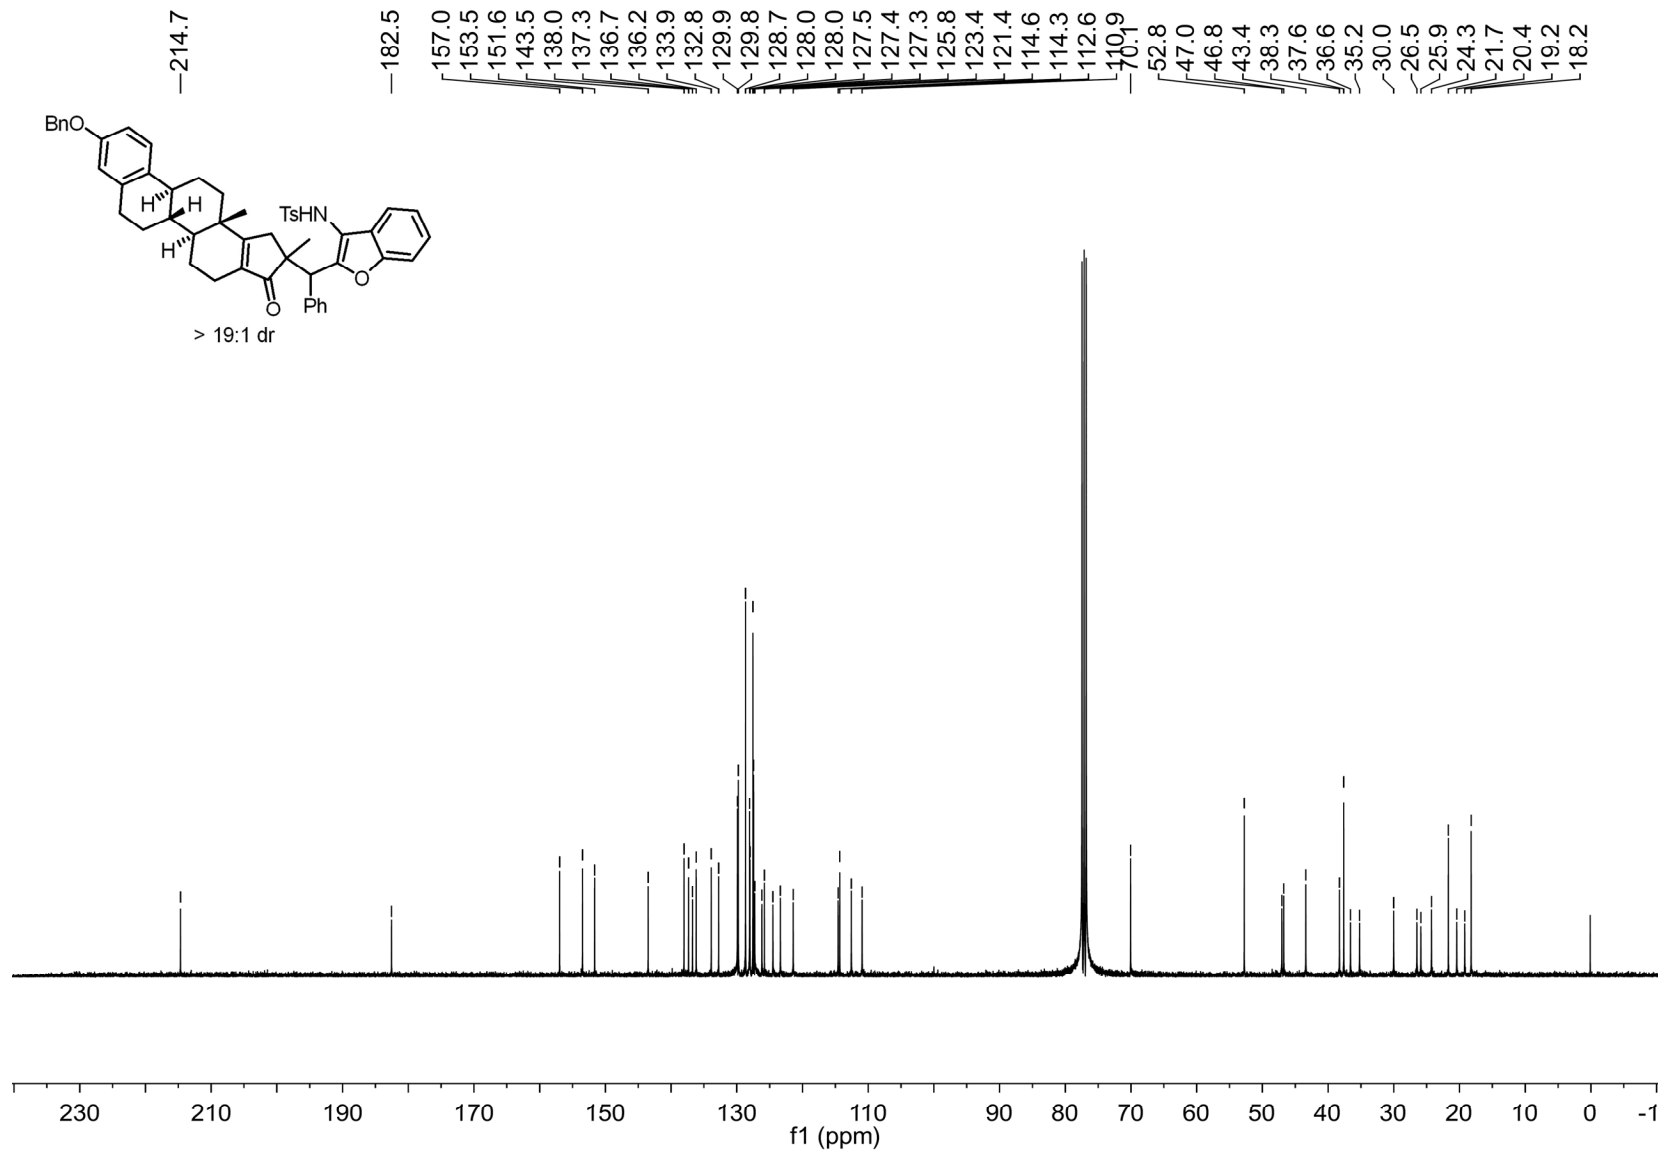

<sup>13</sup>C NMR Spectrum of Compound 5m

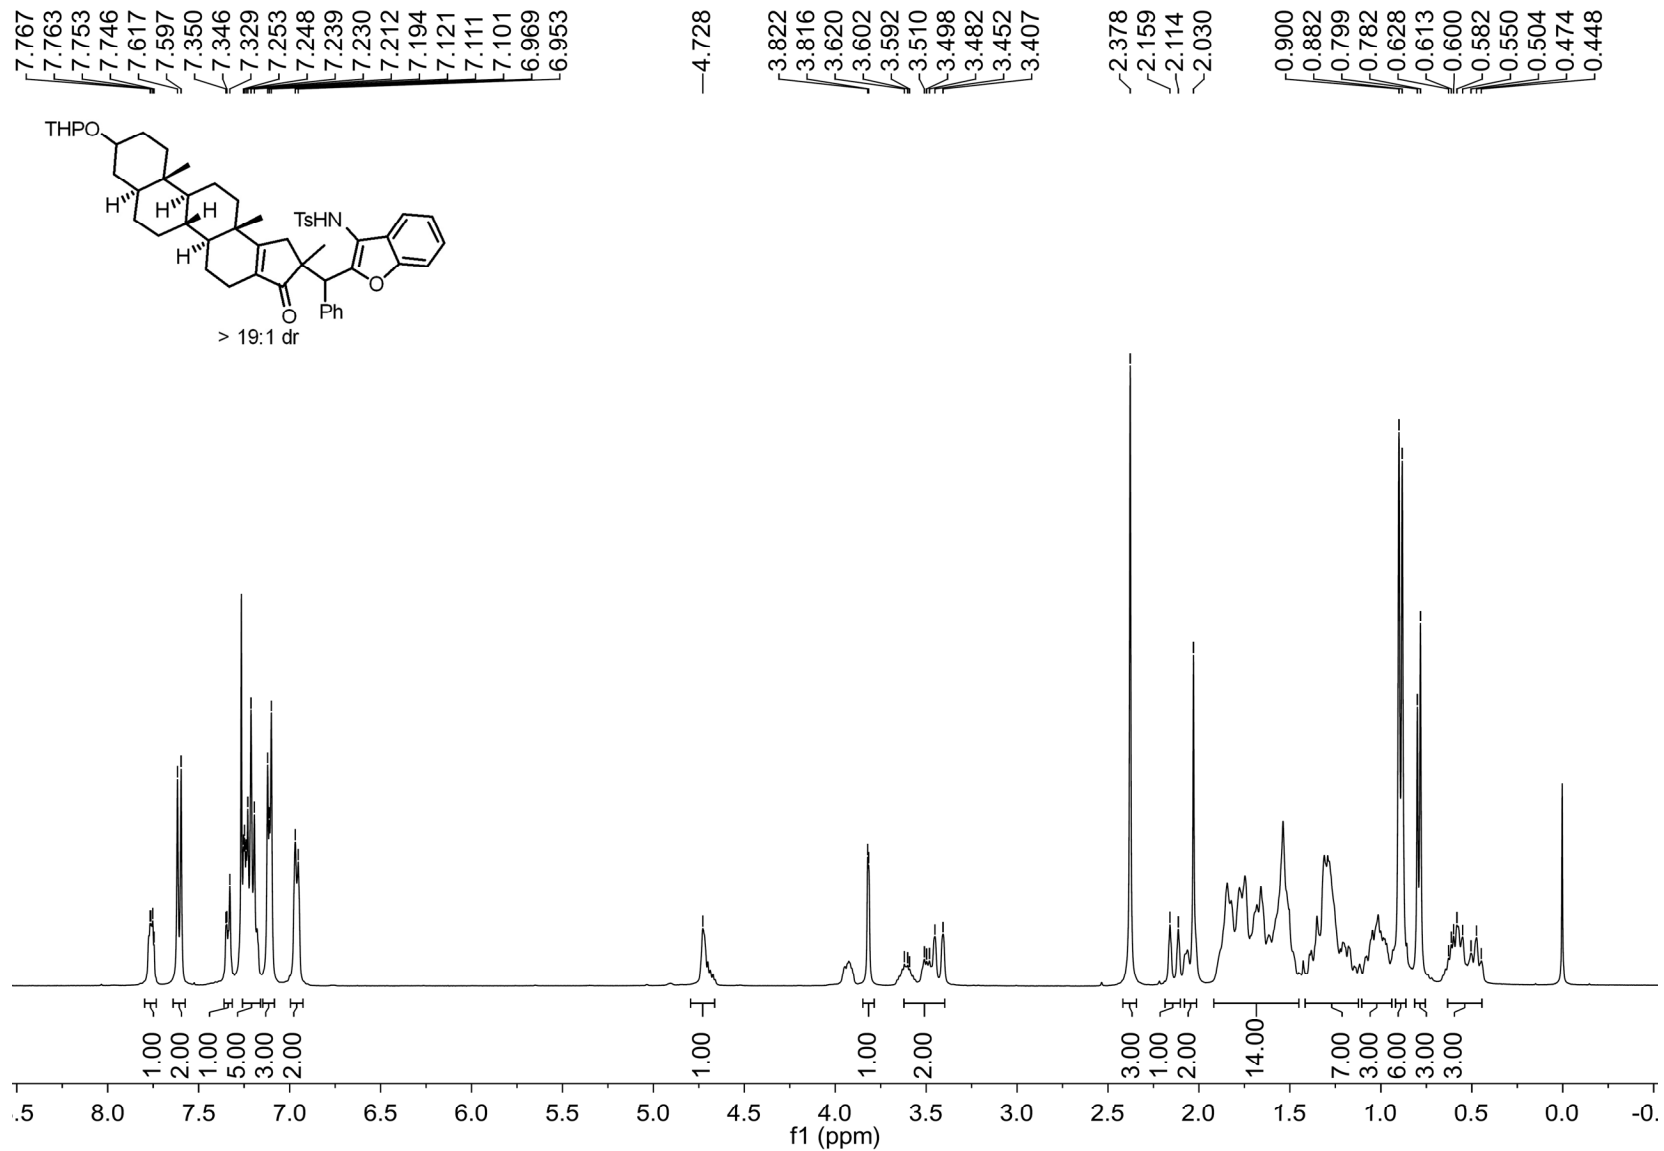

**<sup>1</sup>H NMR Spectrum of Compound 5n**

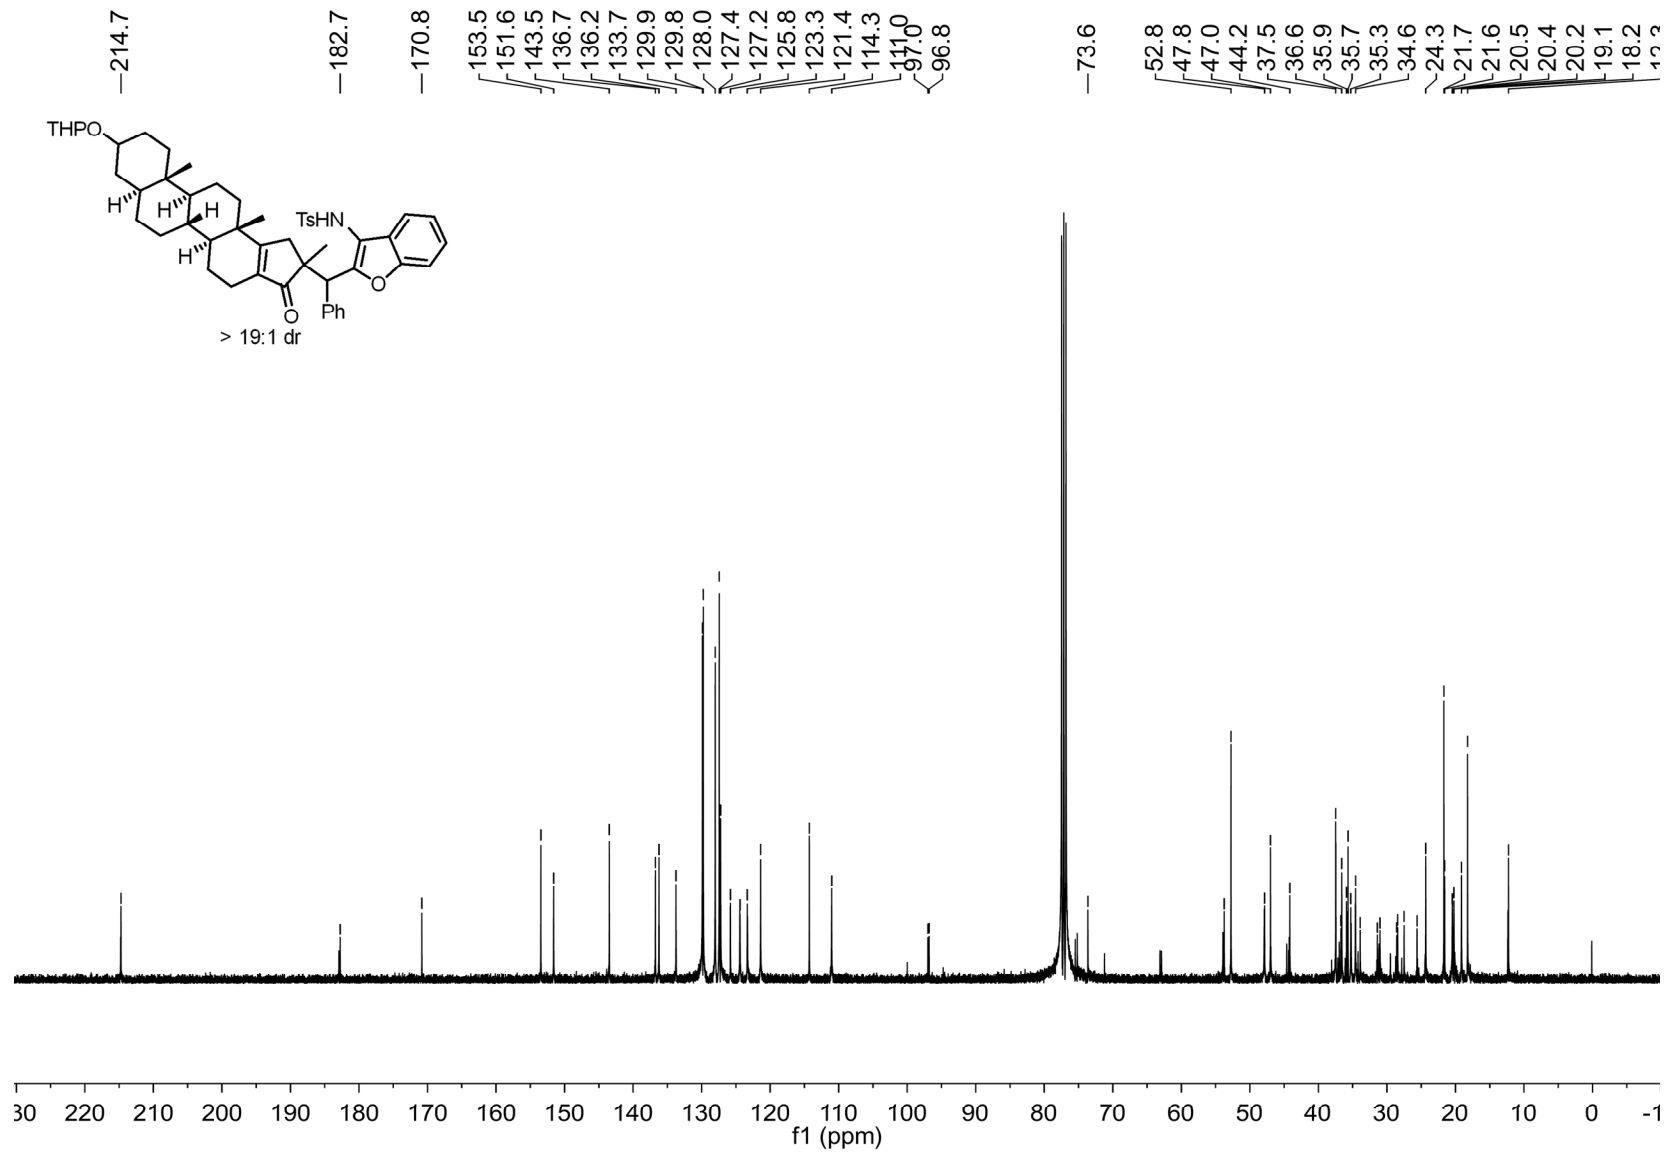

<sup>13</sup>C NMR Spectrum of Compound 5n

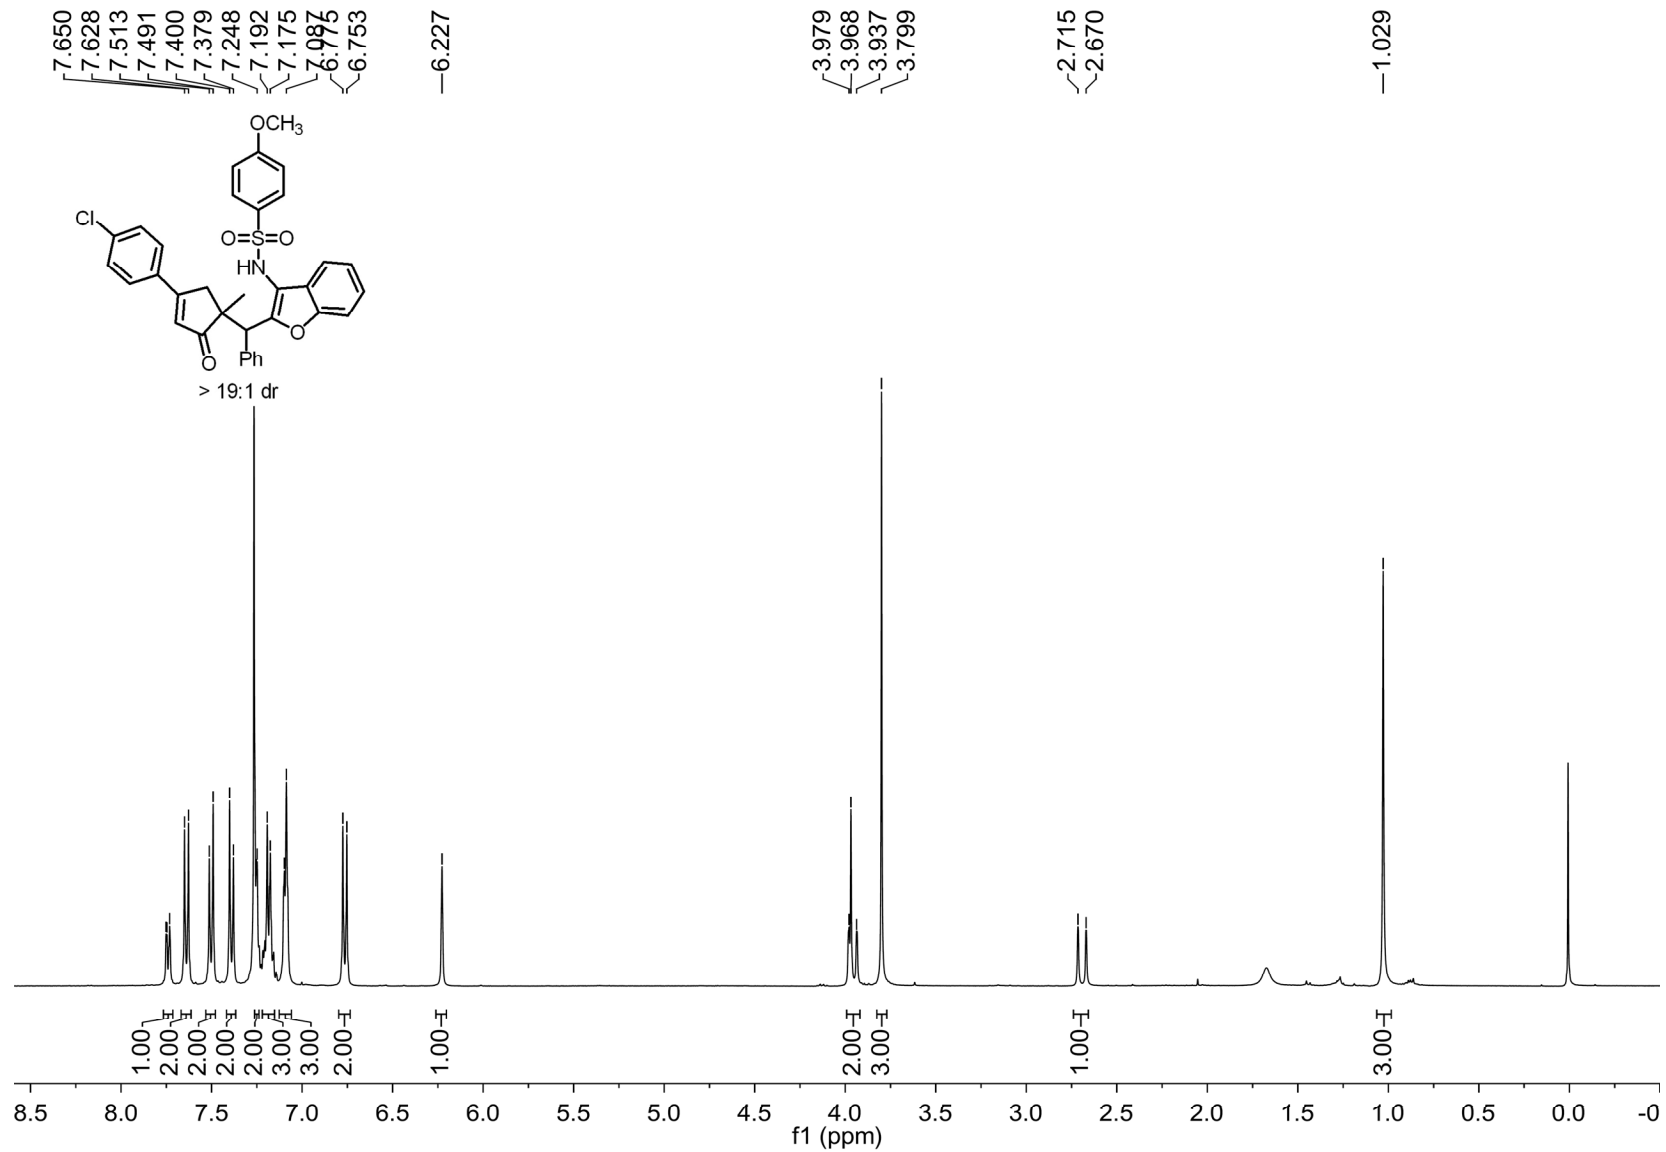

**<sup>1</sup>H NMR Spectrum of Compound 50**

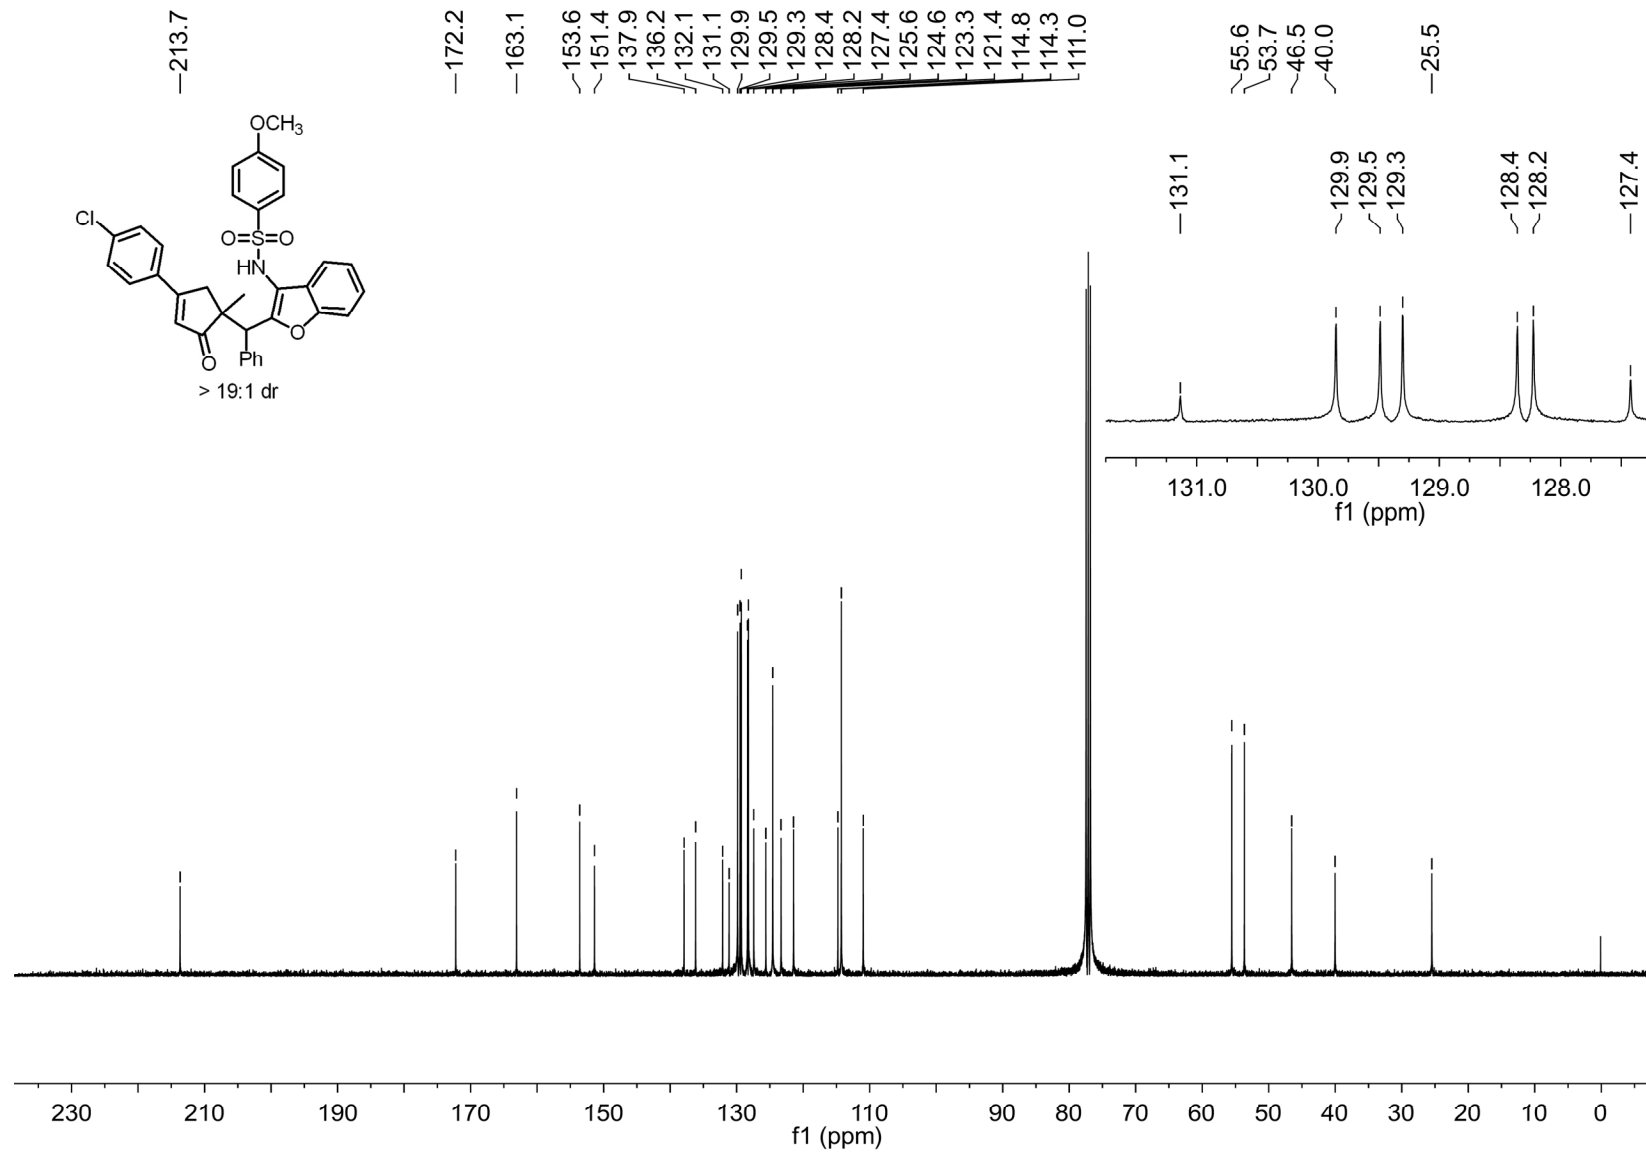

**<sup>13</sup>C NMR Spectrum of Compound 50**

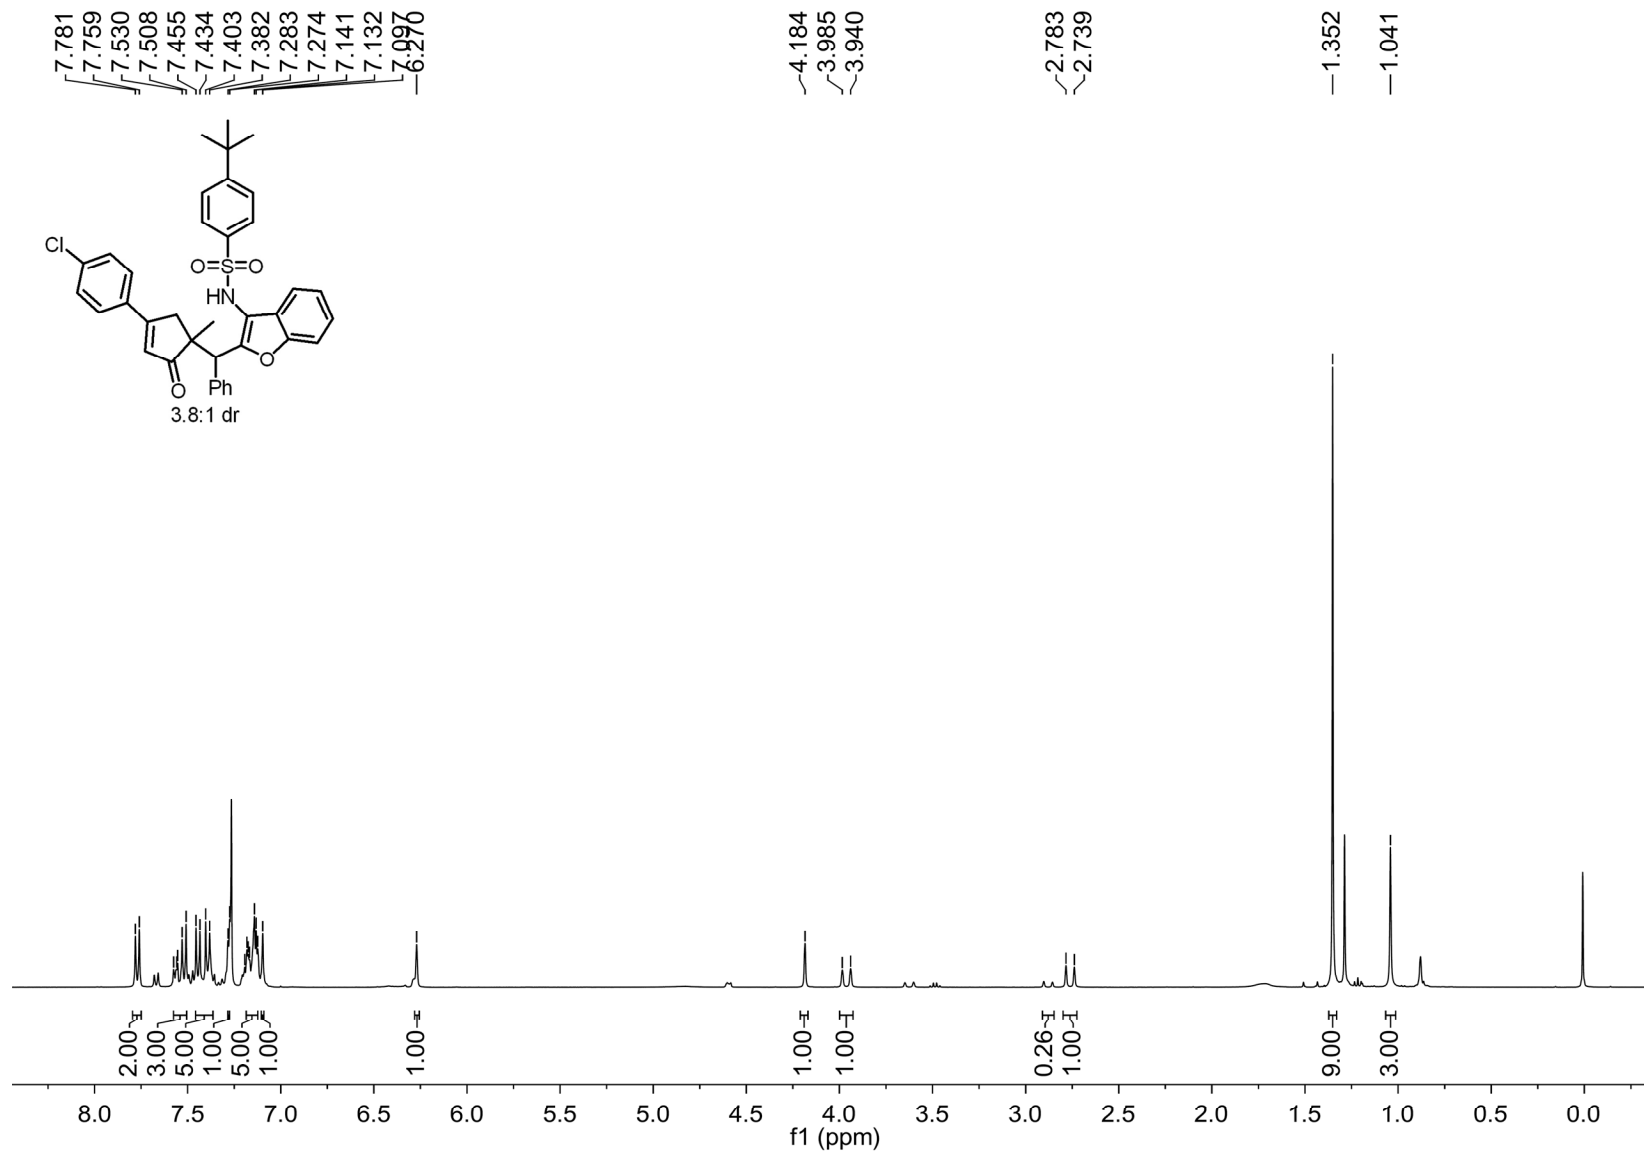

**<sup>1</sup>H NMR Spectrum of Compound 5p**

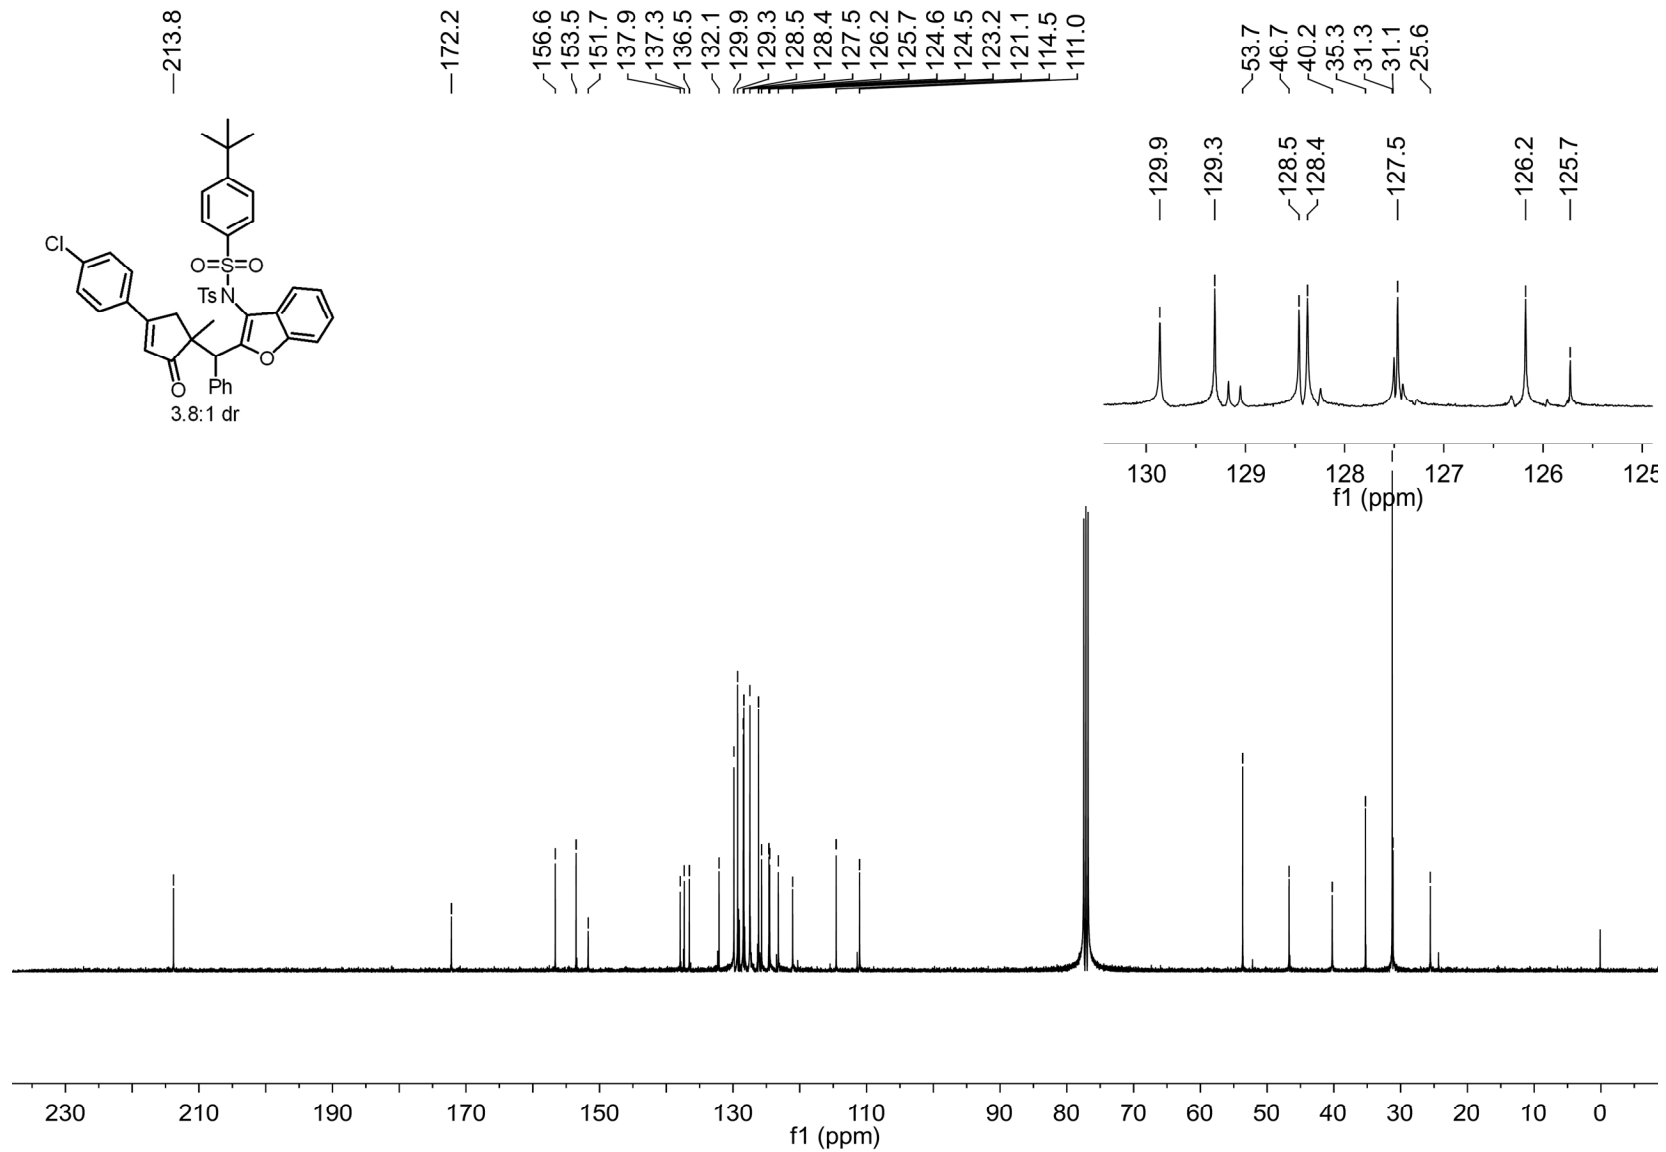

$^{13}\text{C}$  NMR Spectrum of Compound 5p



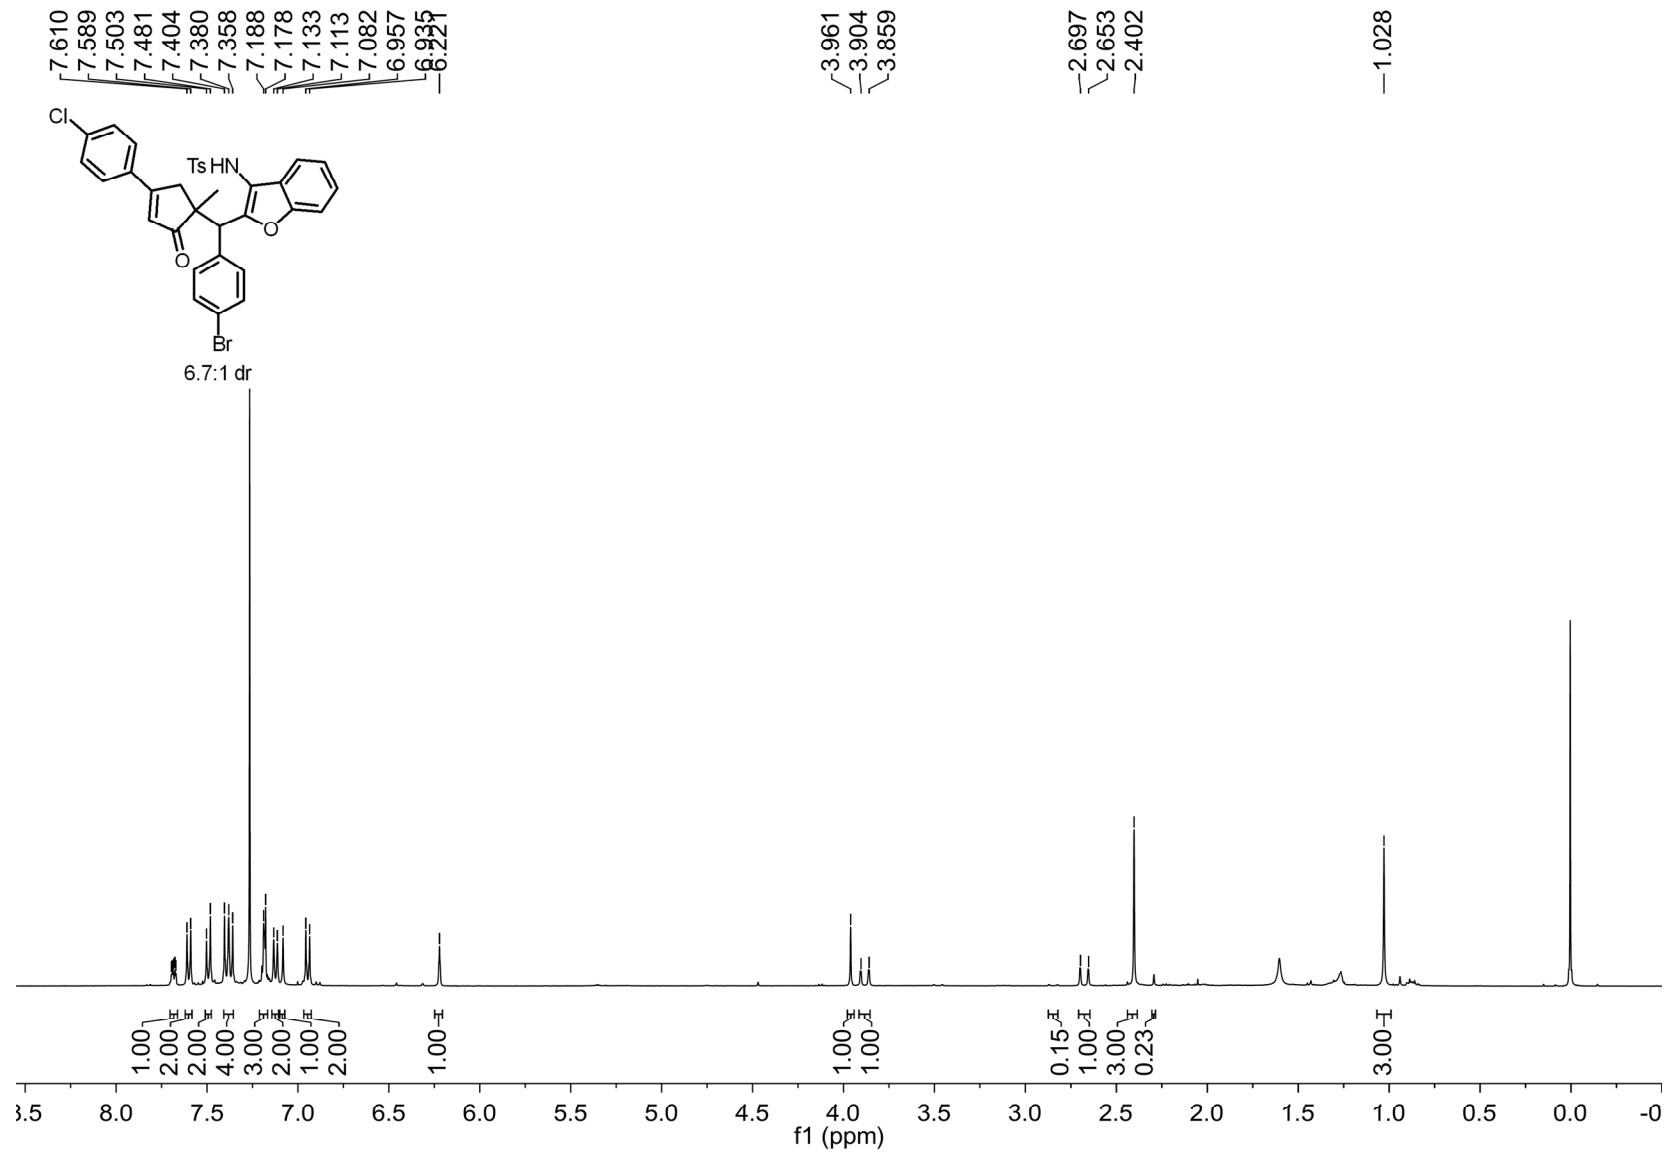

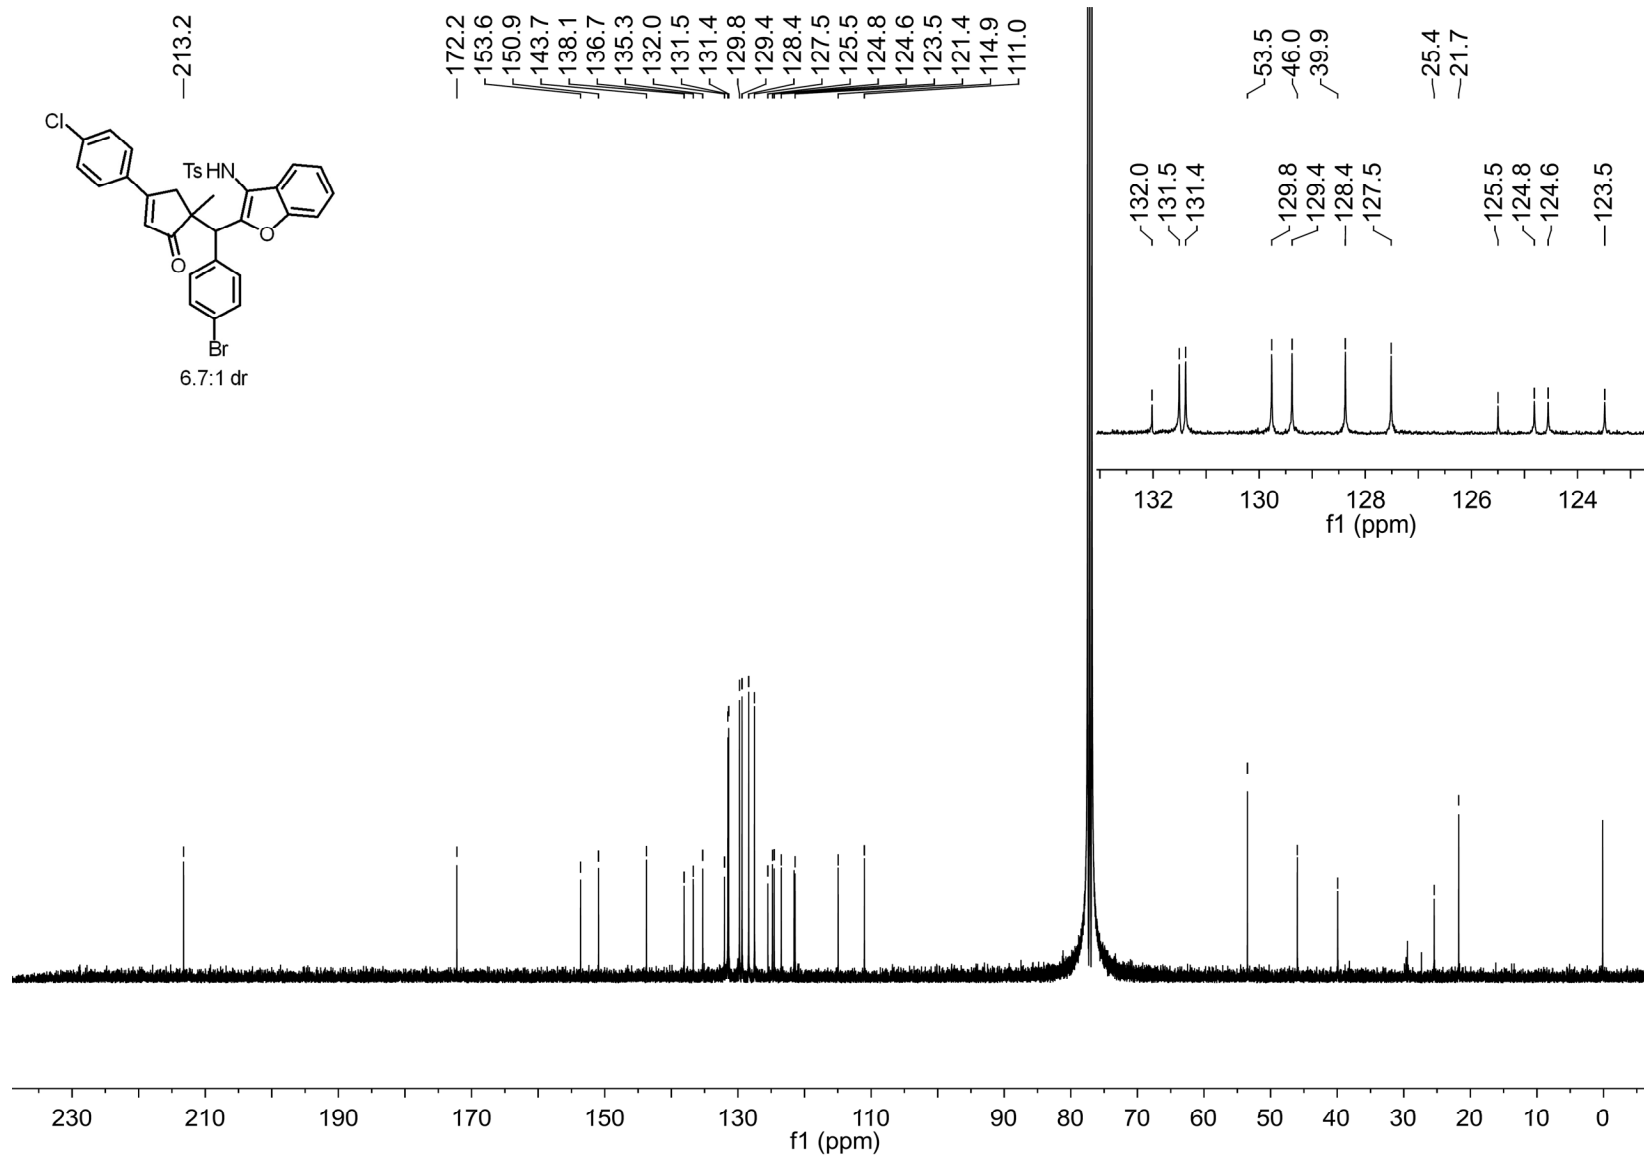

<sup>13</sup>C NMR Spectrum of Compound 5q

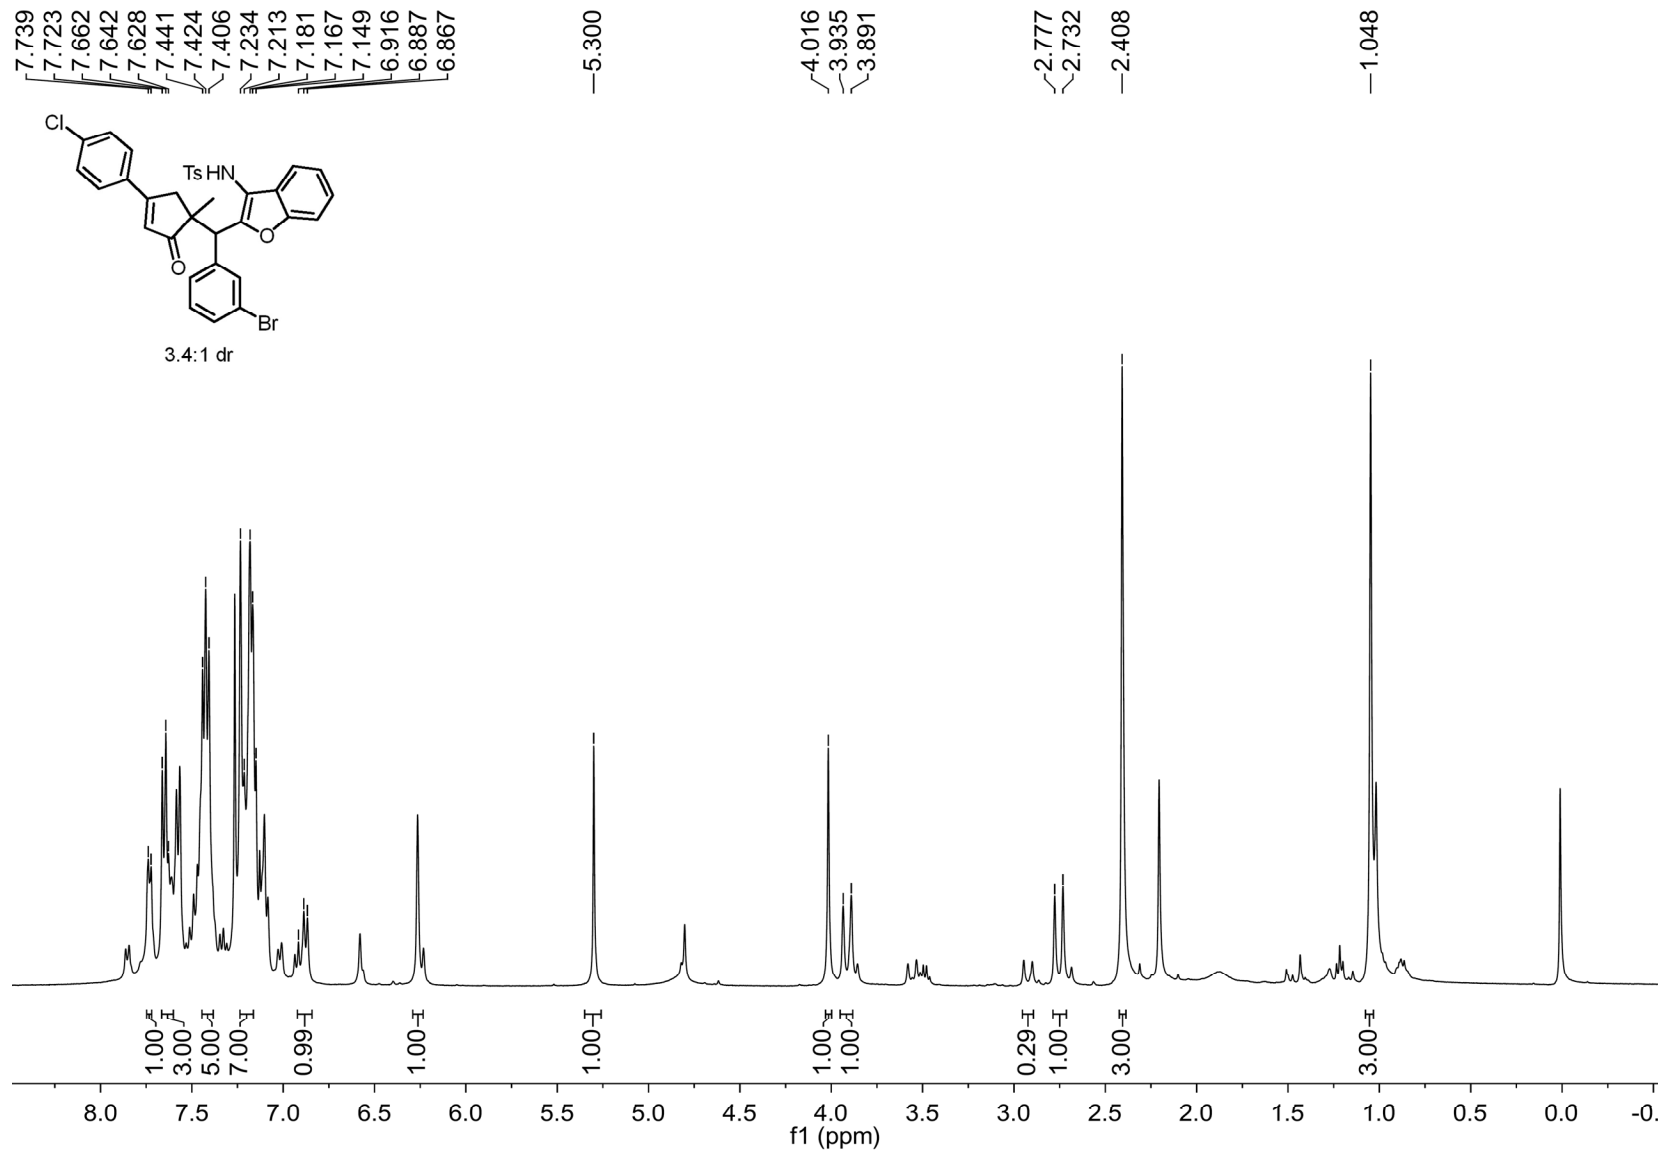

**<sup>1</sup>H NMR Spectrum of Compound 5r**

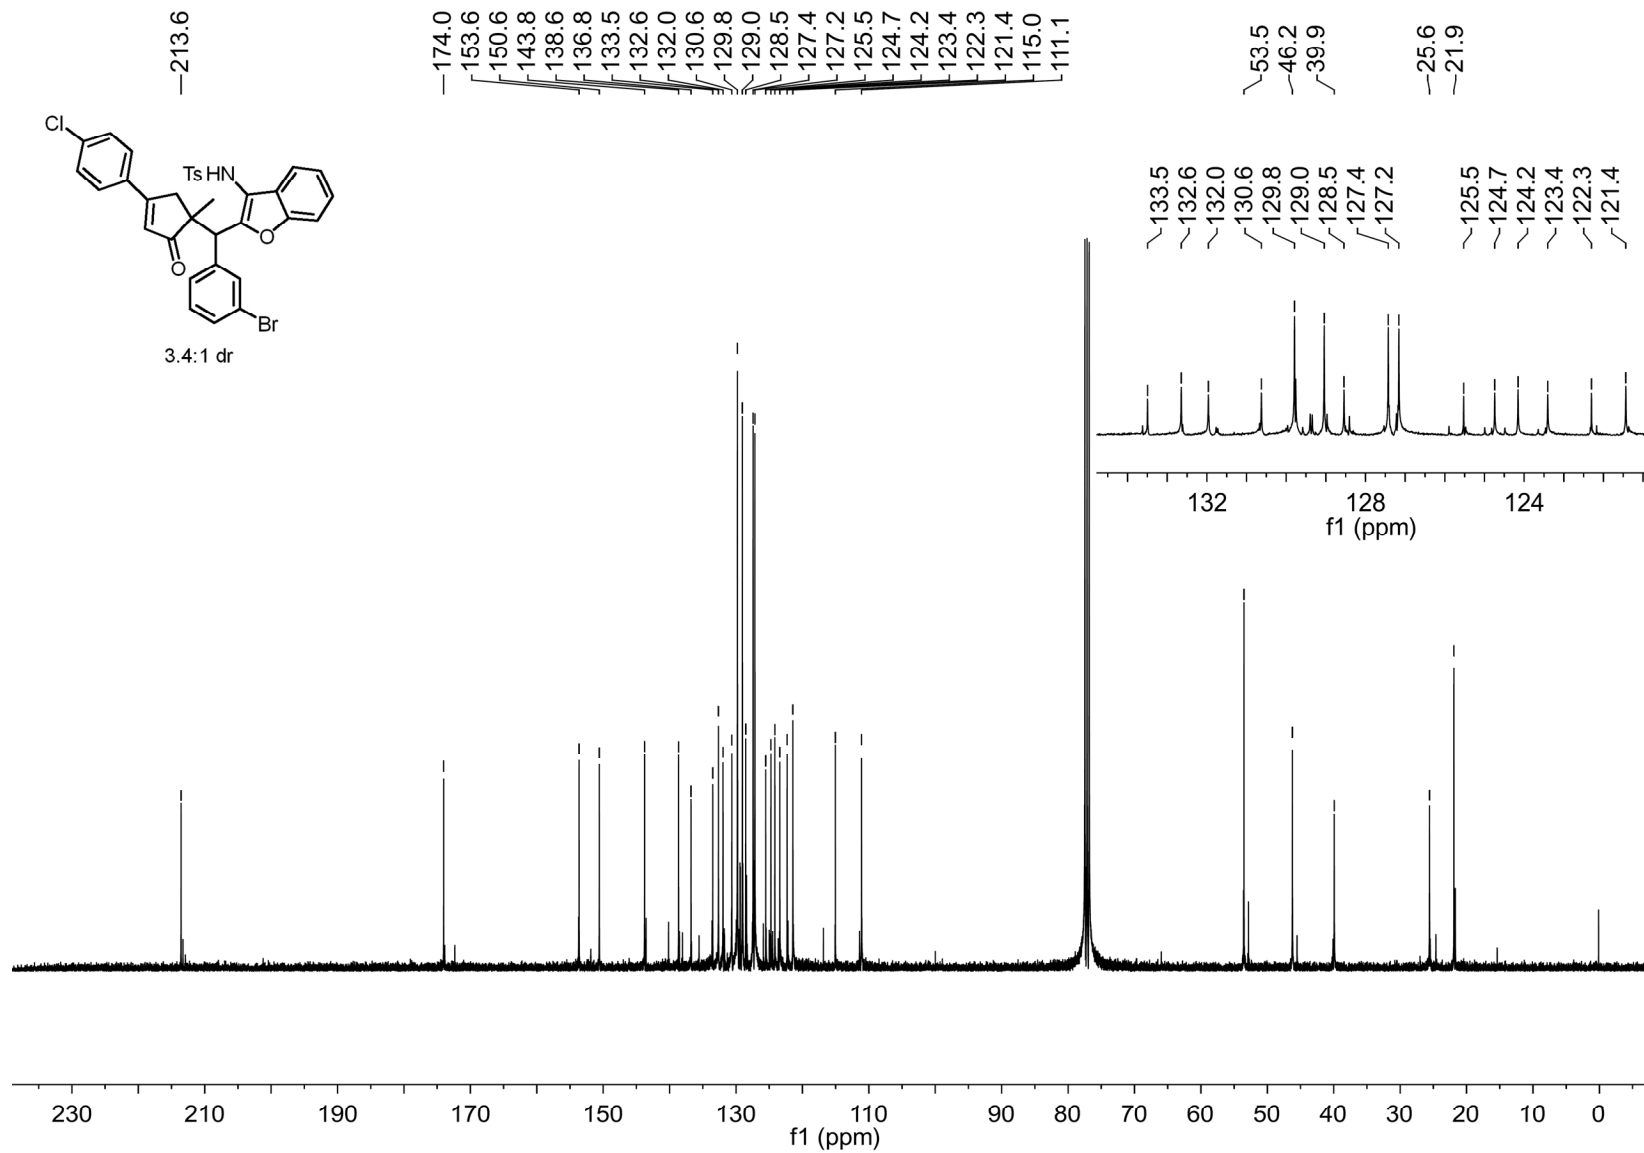

$^{13}\text{C}$  NMR Spectrum of Compound 5r

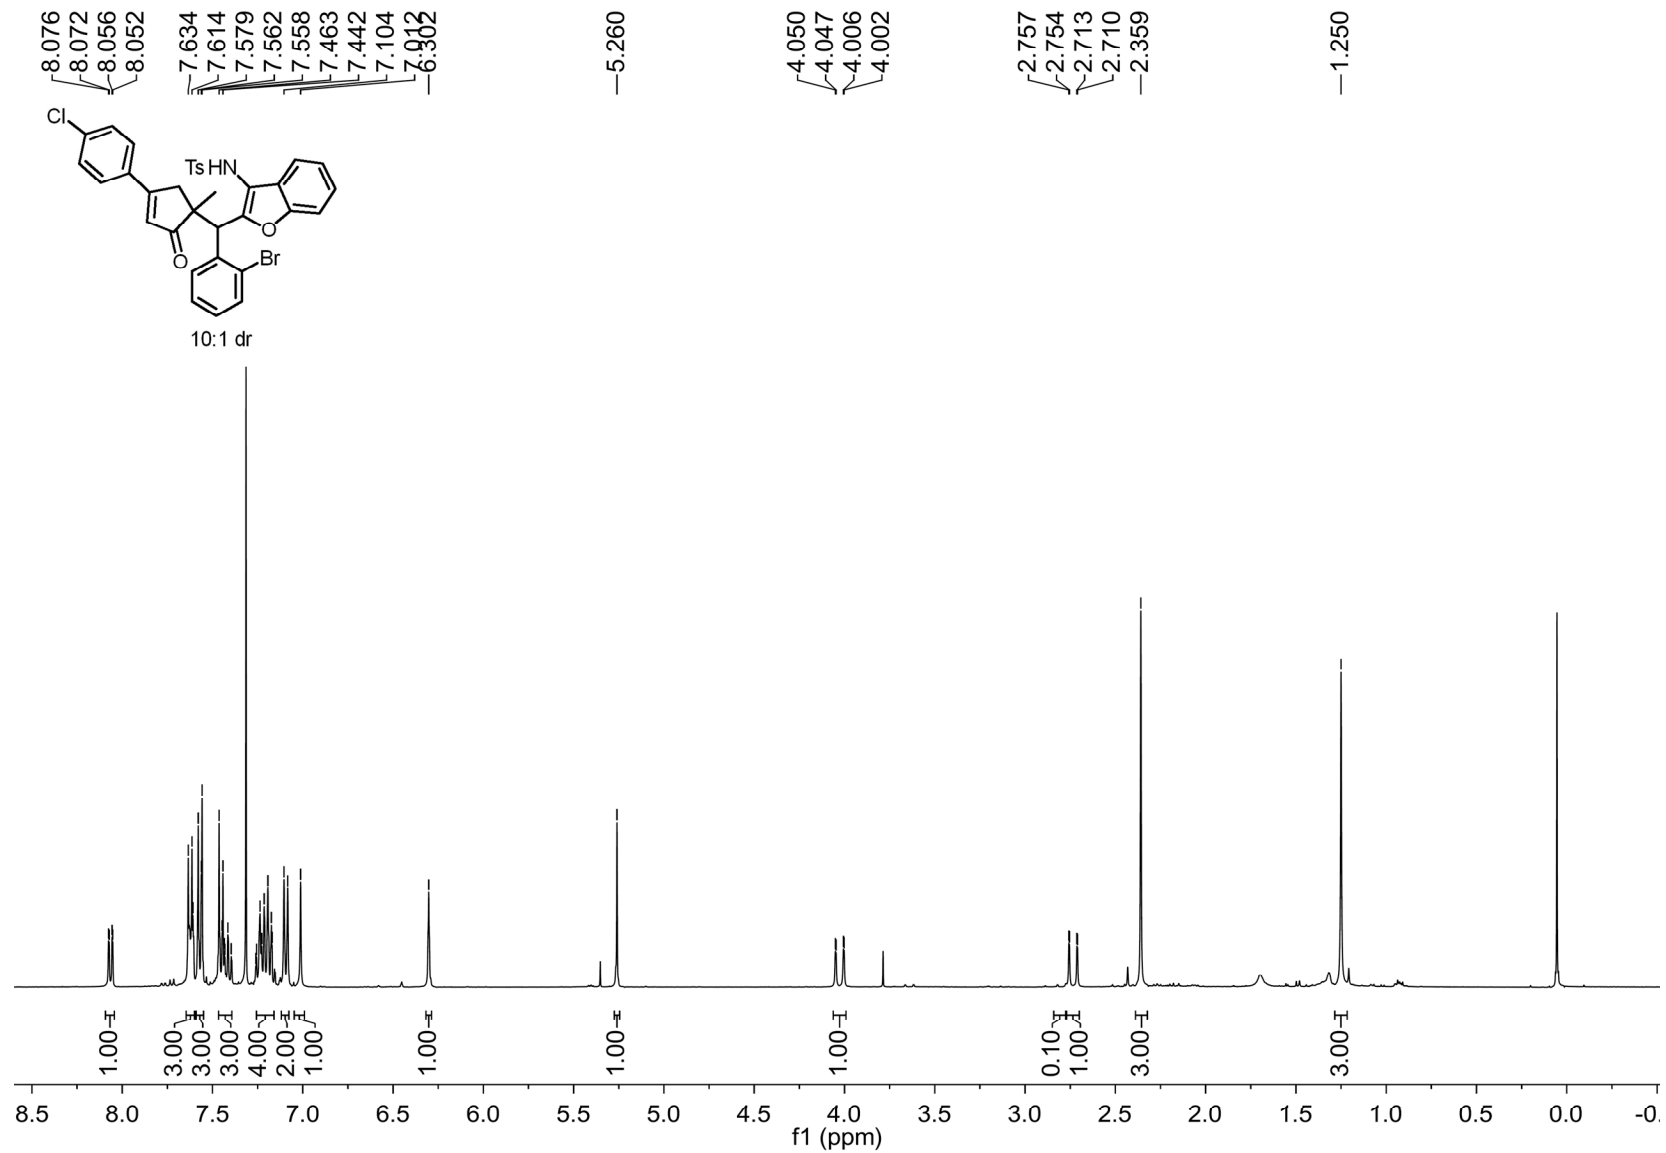

**<sup>1</sup>H NMR Spectrum of Compound 5s**

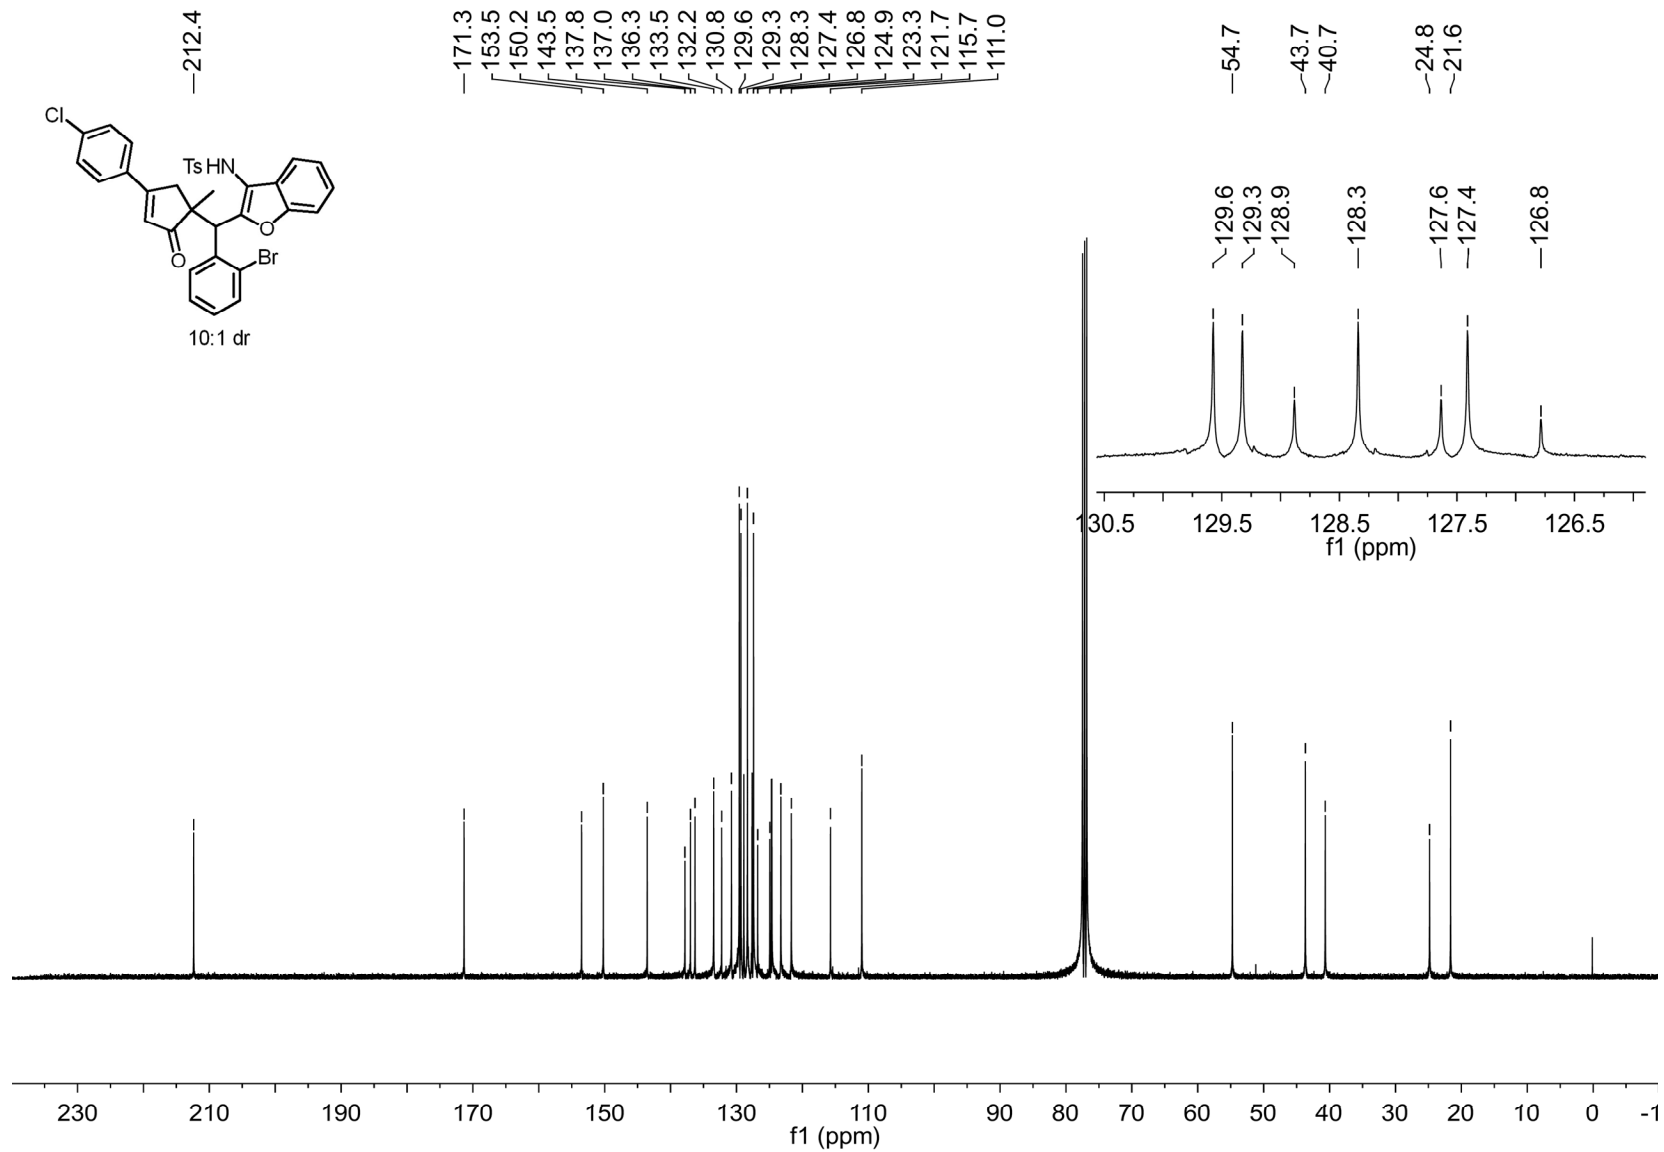

$^{13}\text{C}$  NMR Spectrum of Compound 5s

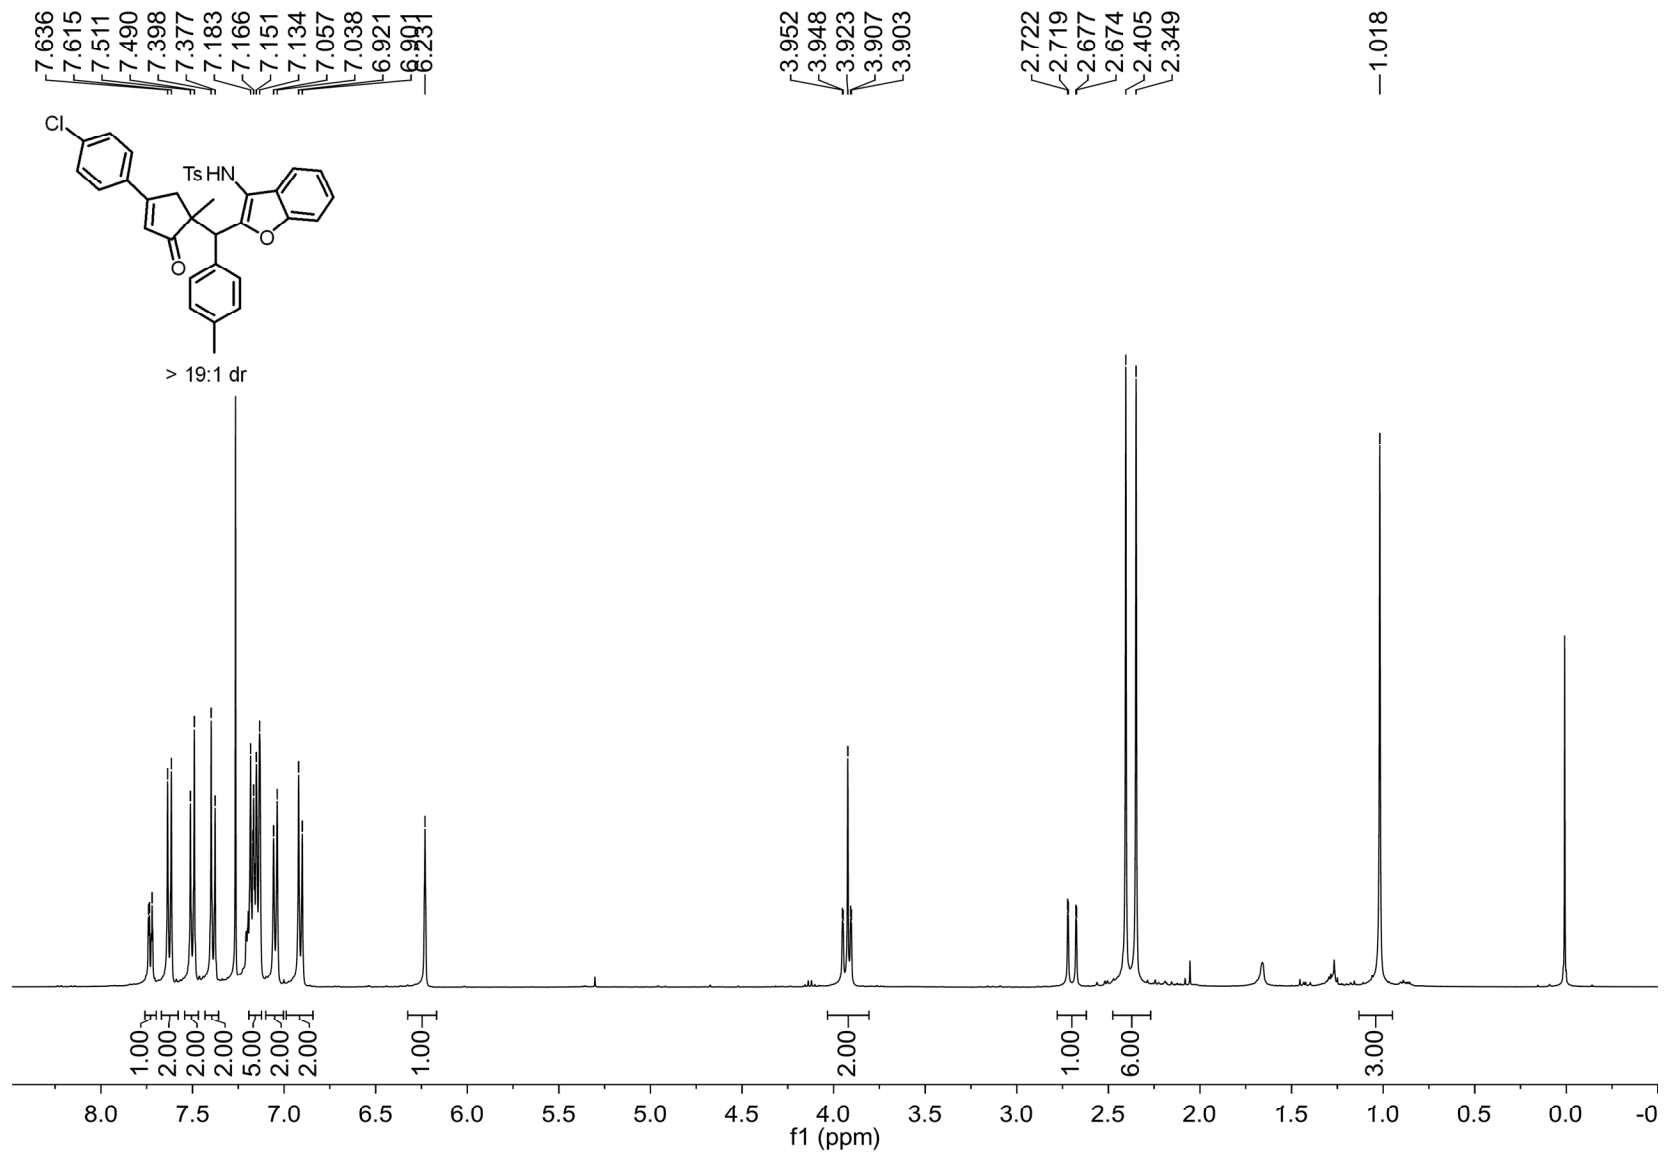

$^1\text{H}$  NMR Spectrum of Compound 5t

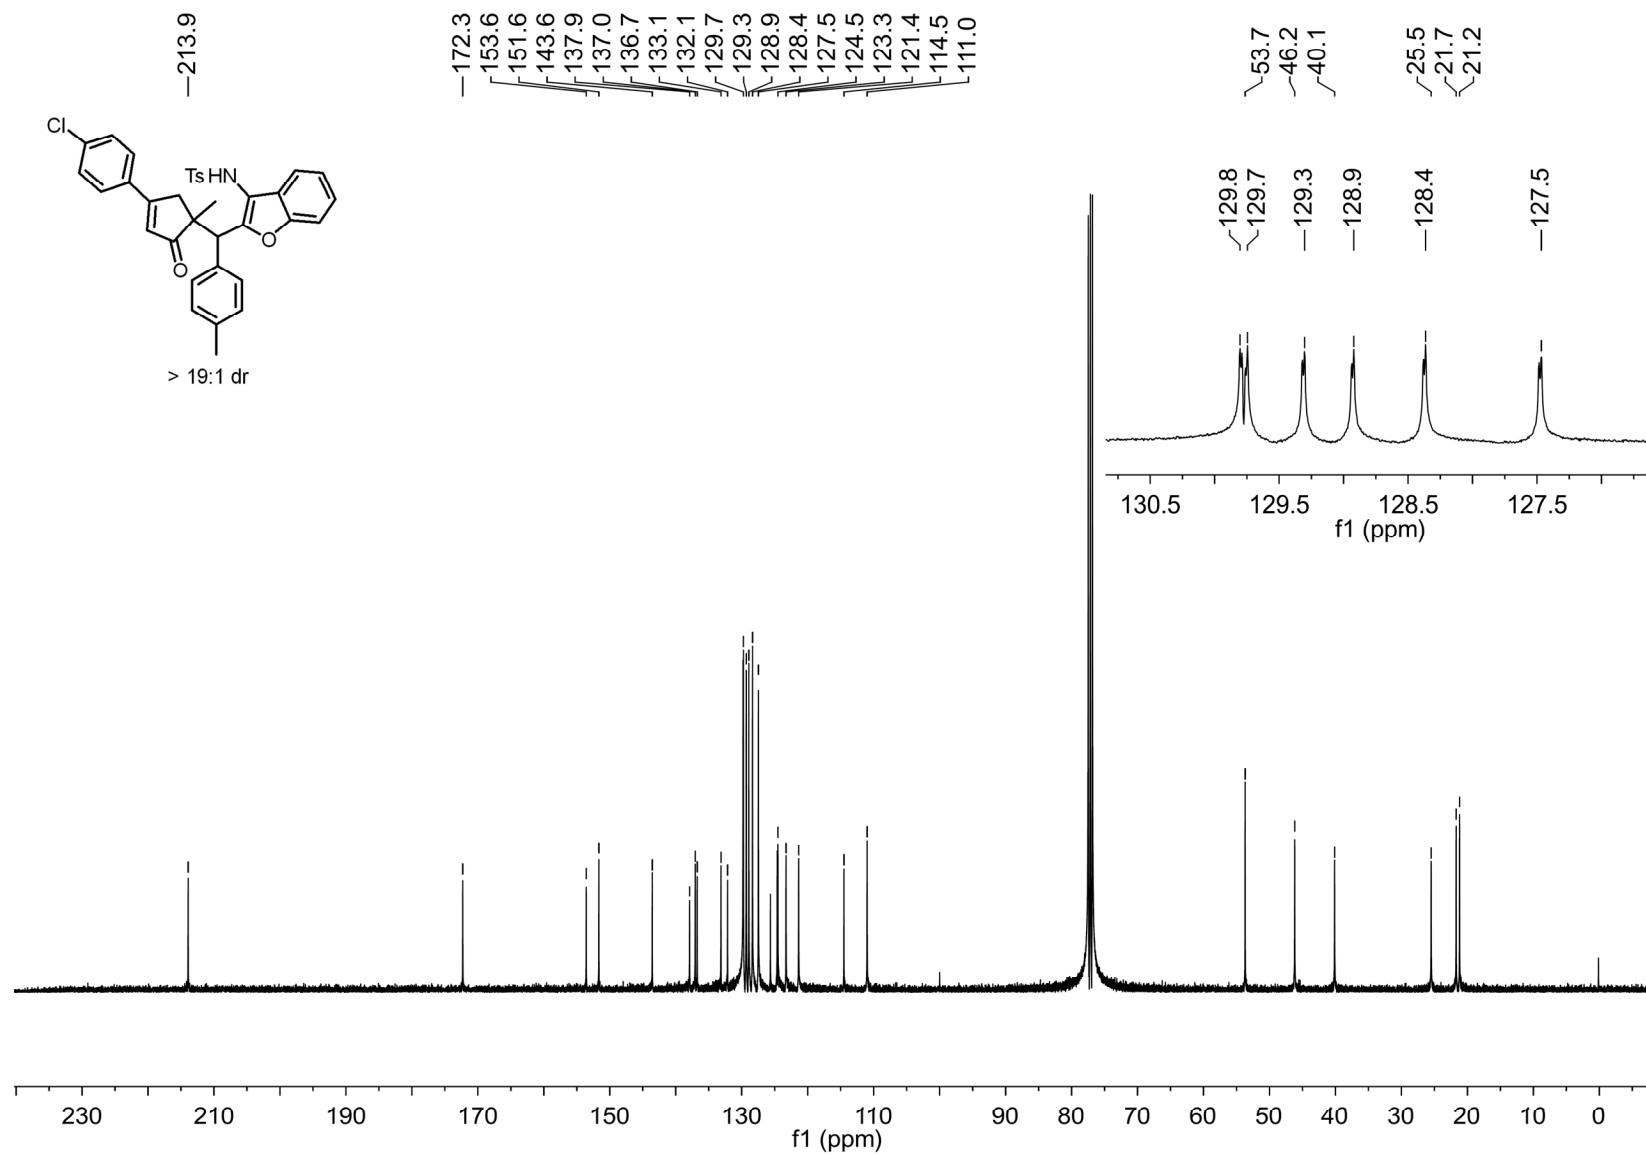

$^{13}\text{C}$  NMR Spectrum of Compound 5t



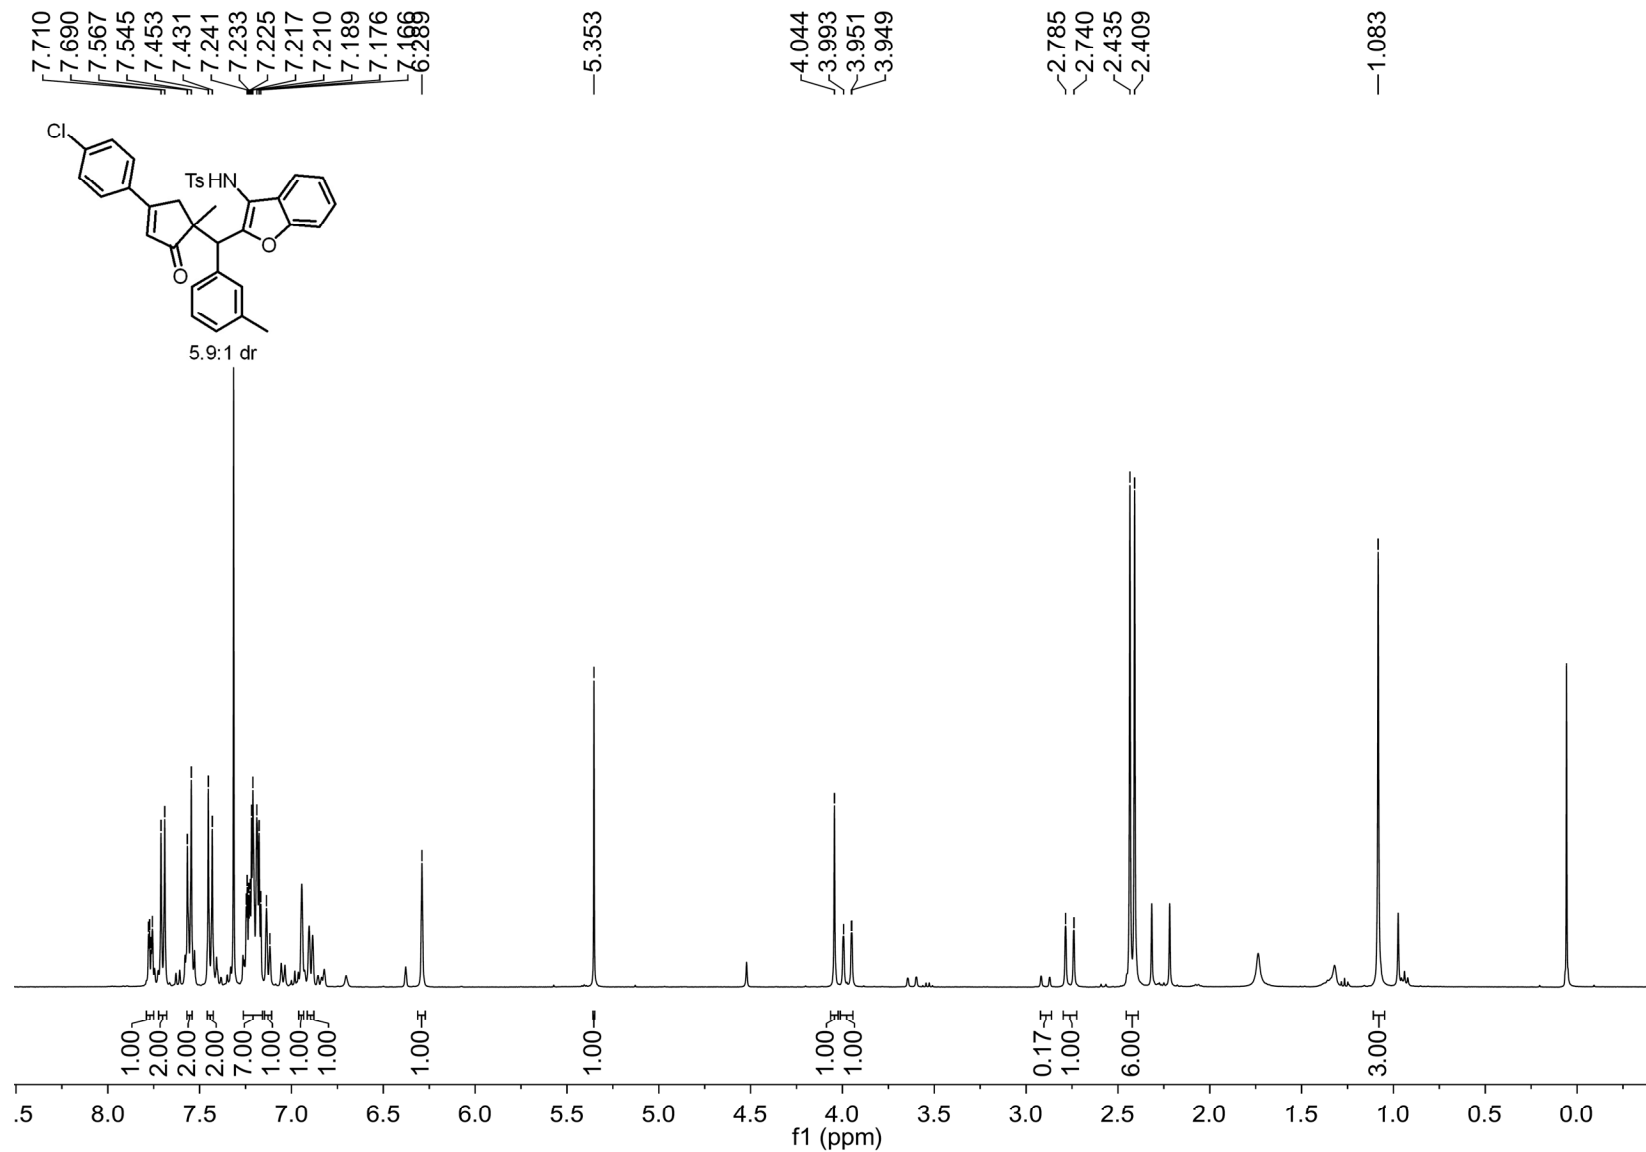

**<sup>1</sup>H NMR Spectrum of Compound 5u**

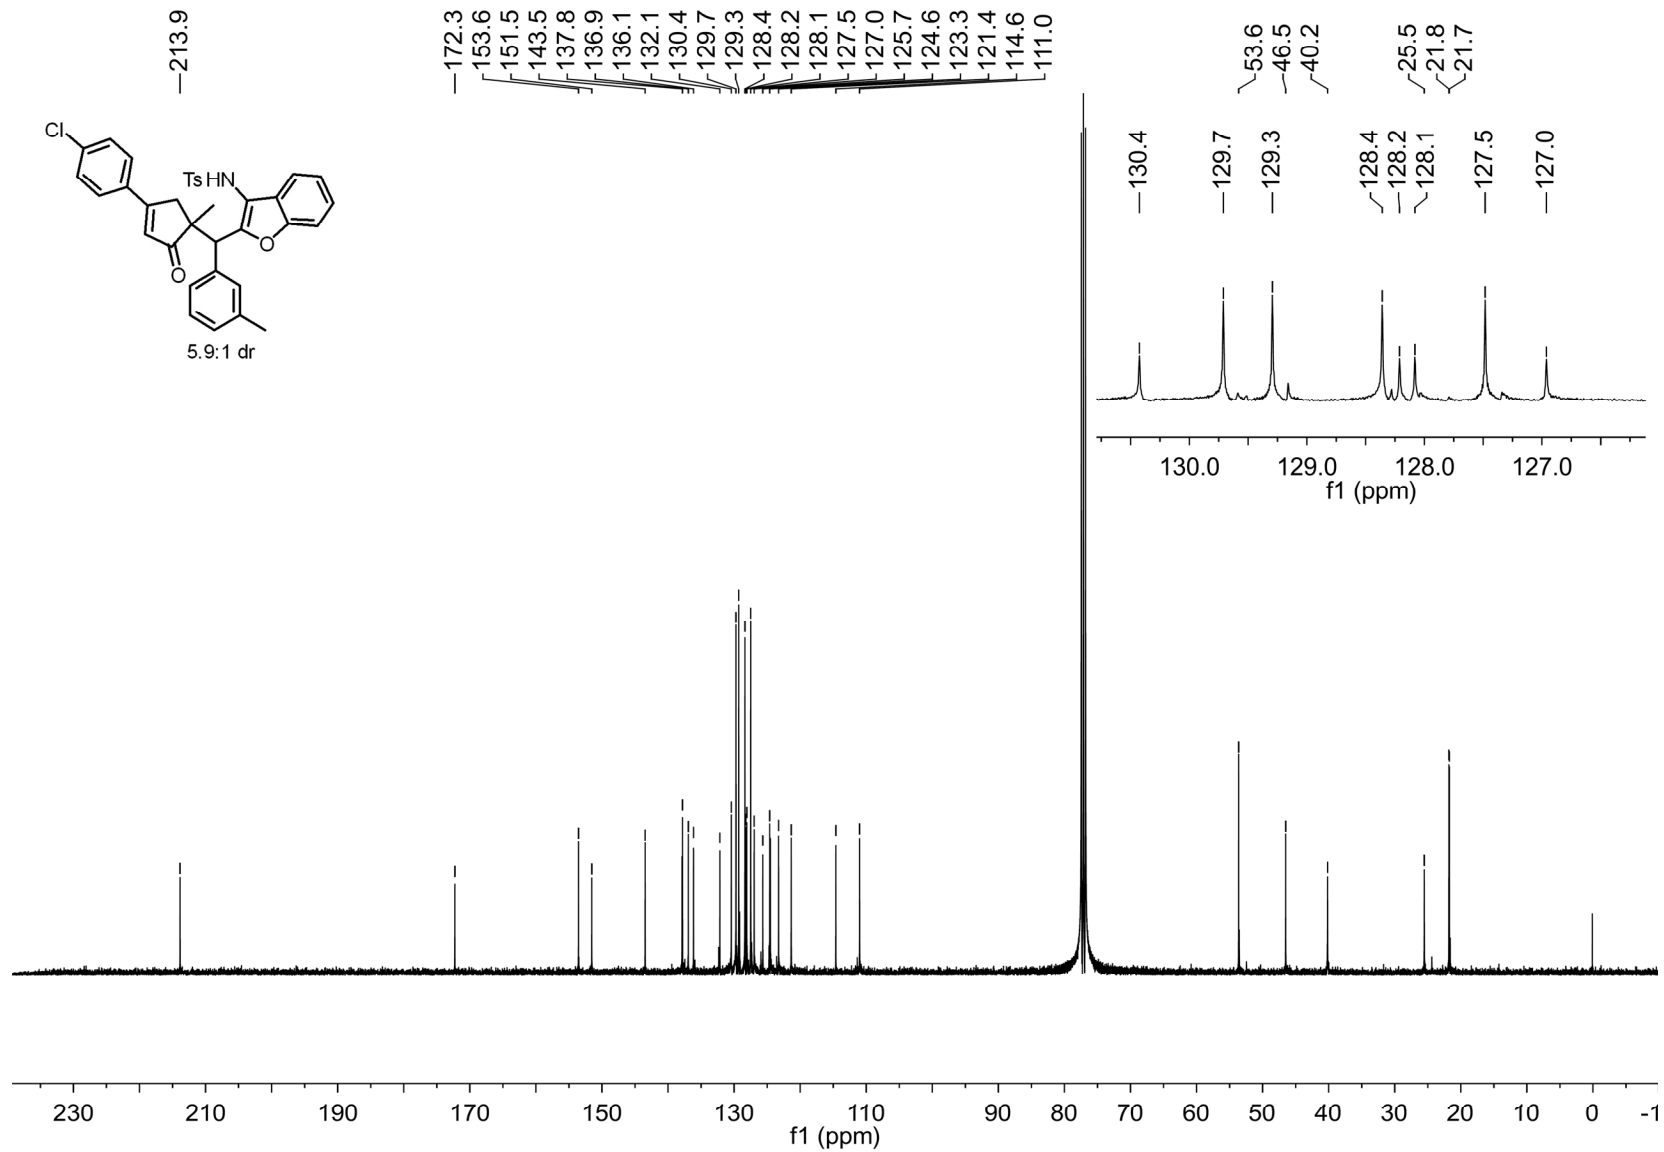

<sup>13</sup>C NMR Spectrum of Compound 5u

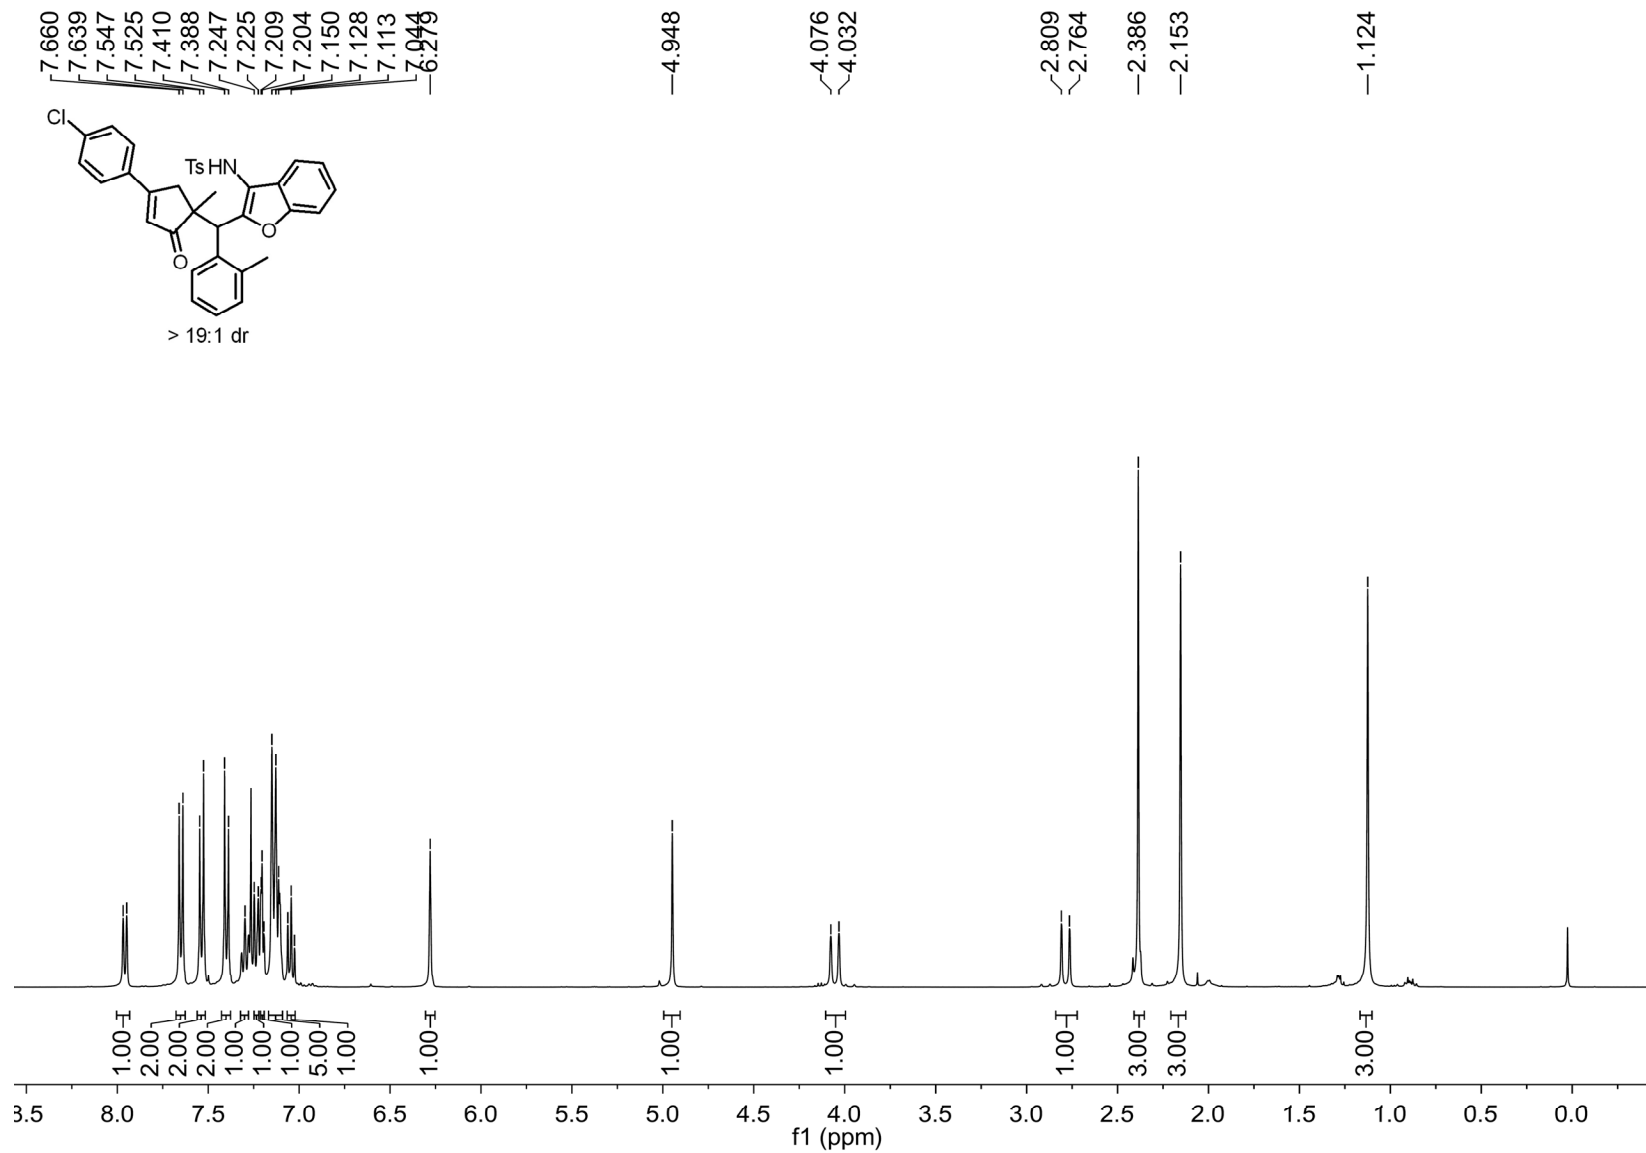

$^1\text{H}$  NMR Spectrum of Compound 5v

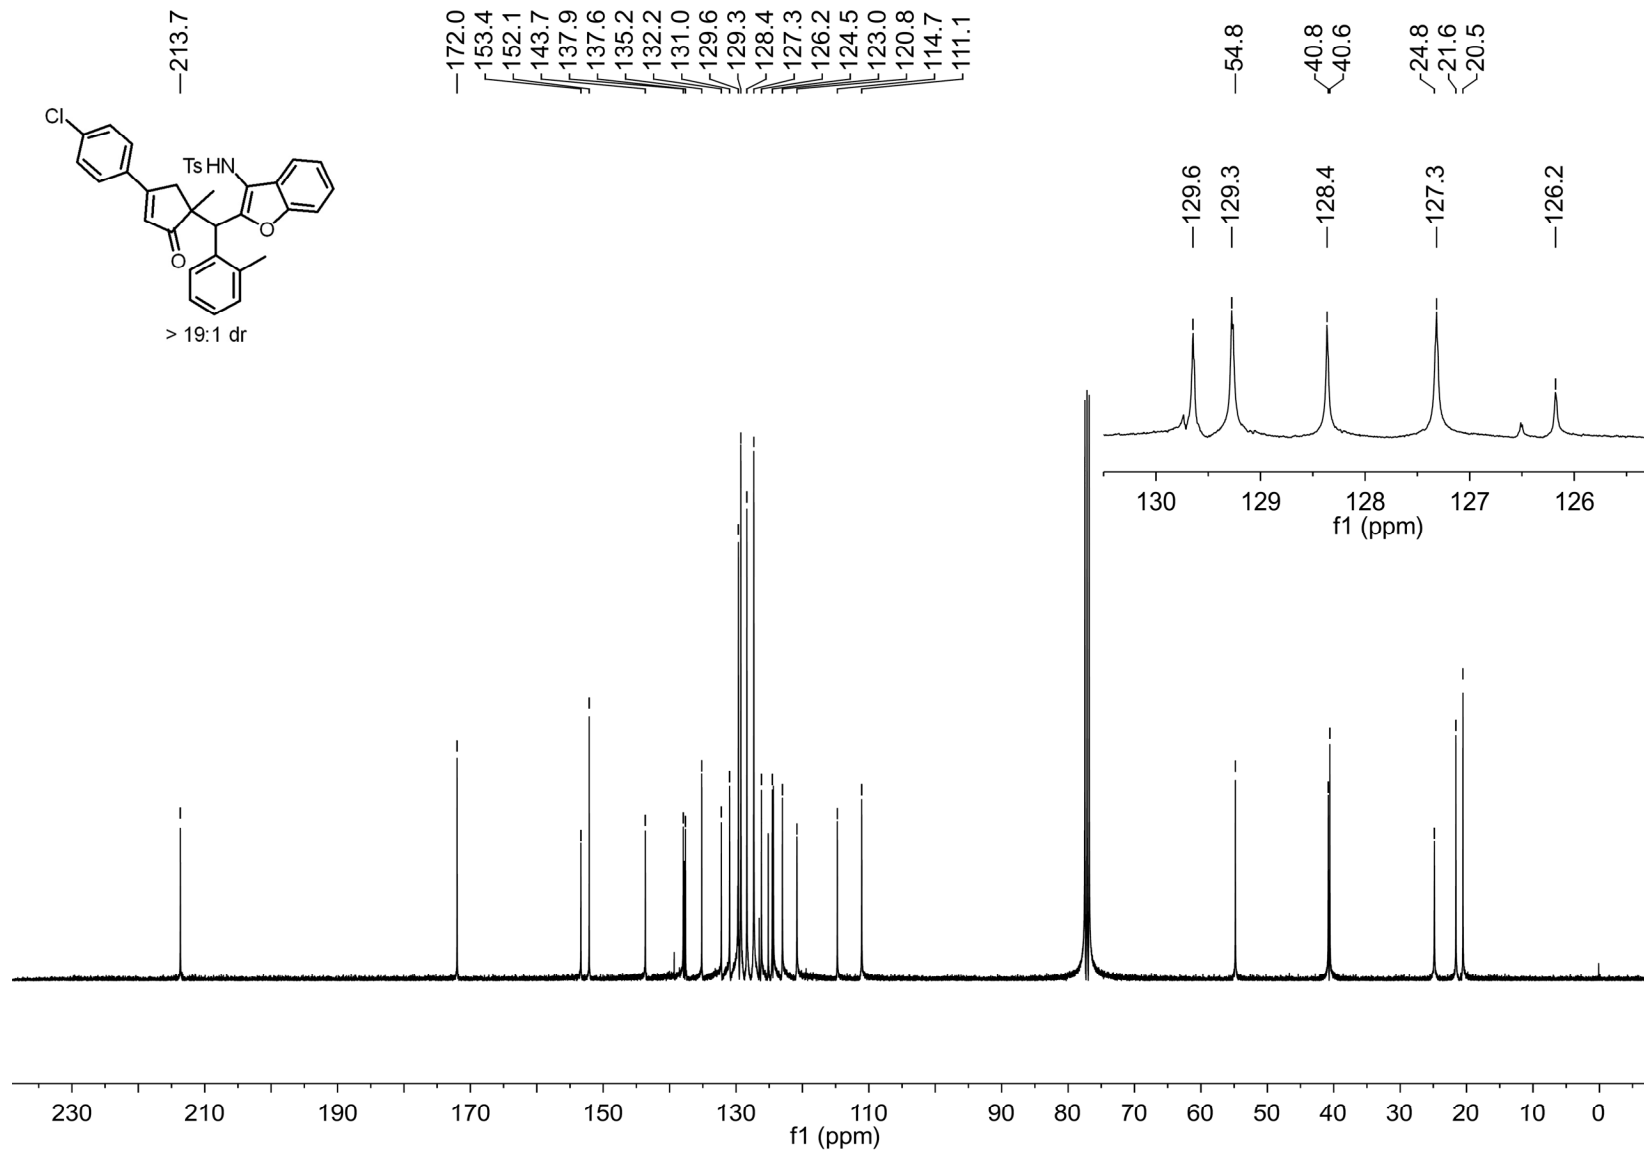

$^{13}\text{C}$  NMR Spectrum of Compound 5v
